# Supplementary material for: Perception of a conserved family of plant signalling peptides by the receptor kinase HSL3
Source: PubMed Central journal article supplement (PMC9191895; doi:10.7554/elife.74687), 2022-05-26

Figure1-figure supplement 2

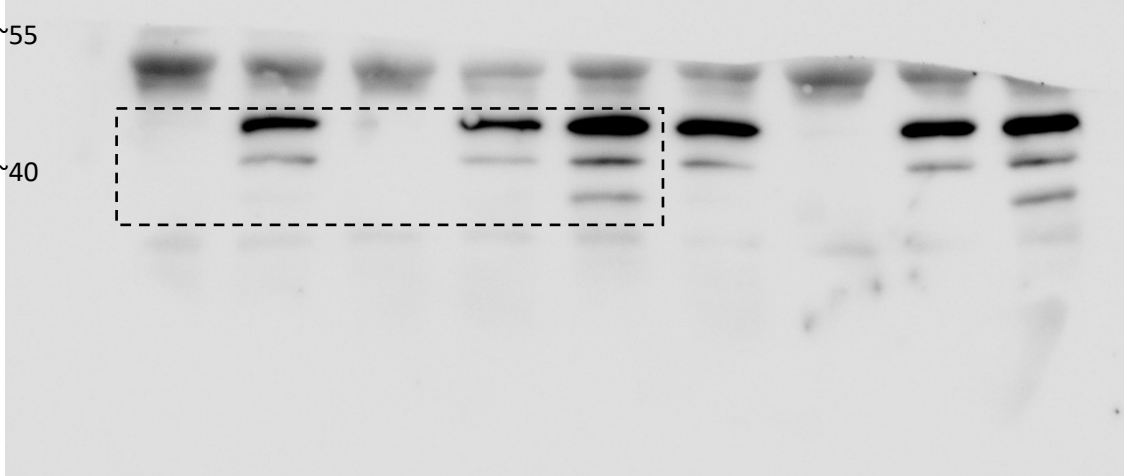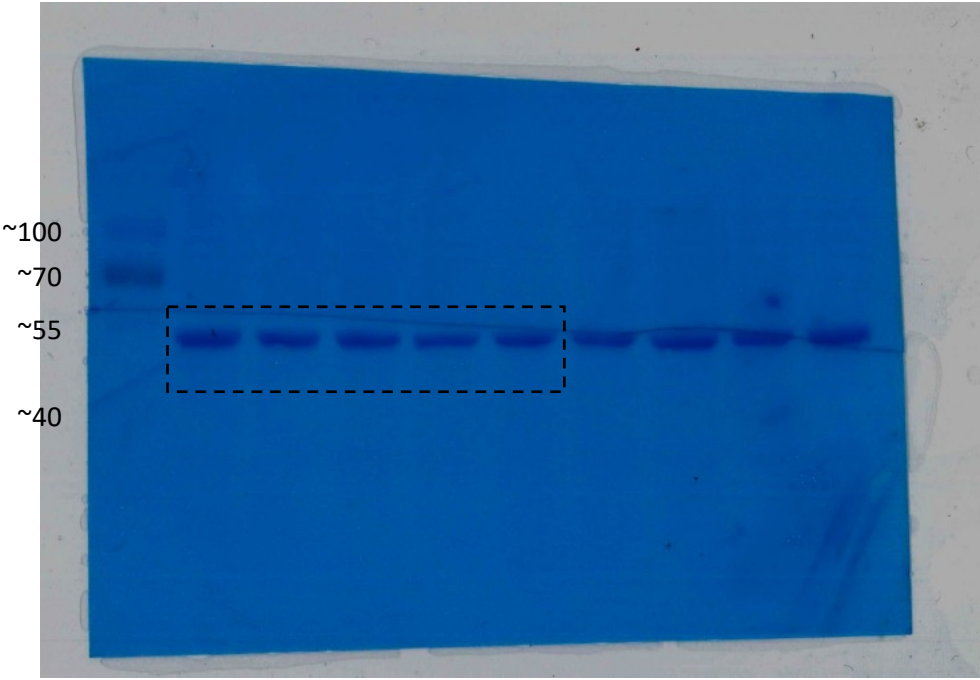

Supplement: elife-74687-fig1-figsupp2-data2.pdf [file elife-74687-fig1-figsupp2-data2.pdf]
