# Supplementary material for: Perception of a conserved family of plant signalling peptides by the receptor kinase HSL3
Source: PubMed Central journal article supplement (PMC9191895; doi:10.7554/elife.74687), 2022-05-26

Figure3-figure supplement 4

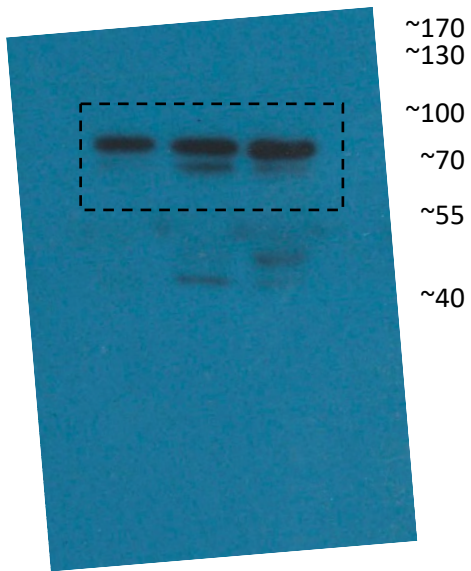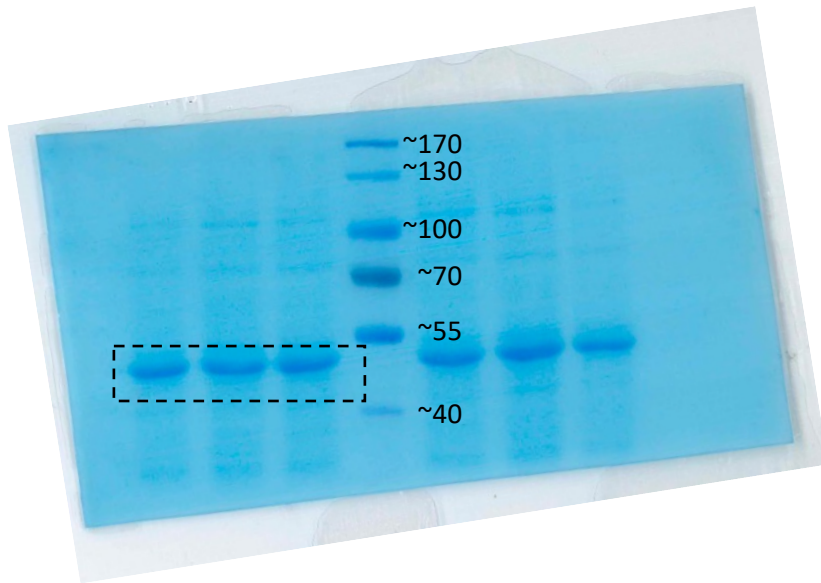

Supplement: elife-74687-fig3-figsupp4-data1.pdf [file elife-74687-fig3-figsupp4-data1.pdf]
