# Supplementary material for: Perception of a conserved family of plant signalling peptides by the receptor kinase HSL3
Source: eLife journal article supplement (doi:10.7554/elife.74687), 2022-05-26
Supplement: fig2-data2 [file elife-74687-fig2-data2-v2.pdf]

Figure 2c

IP-GFP

-HSL3-GFP

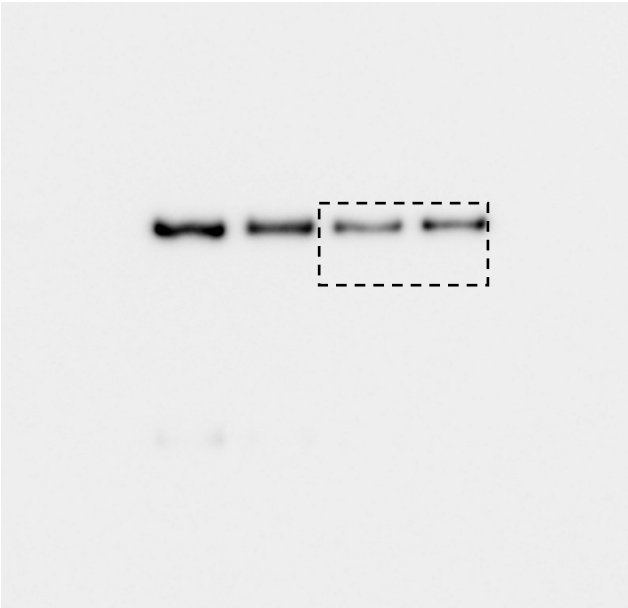

$\alpha$  GFP

-BAK1

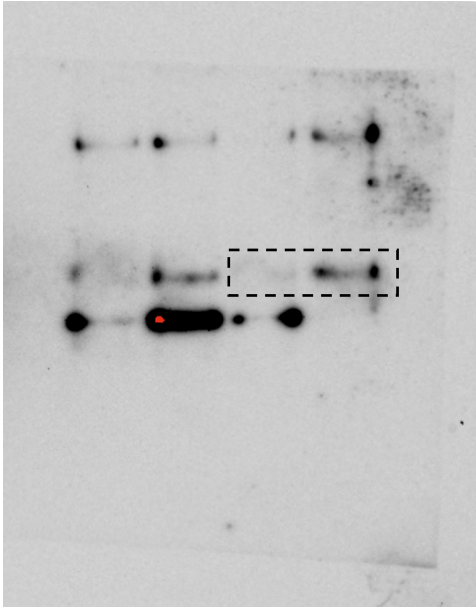

$\alpha$  BAK1

Input

-HSL3-GFP

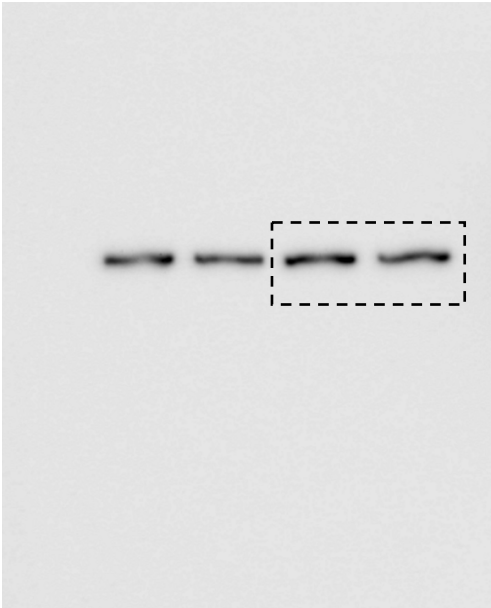

$\alpha$  GFP

-BAK1

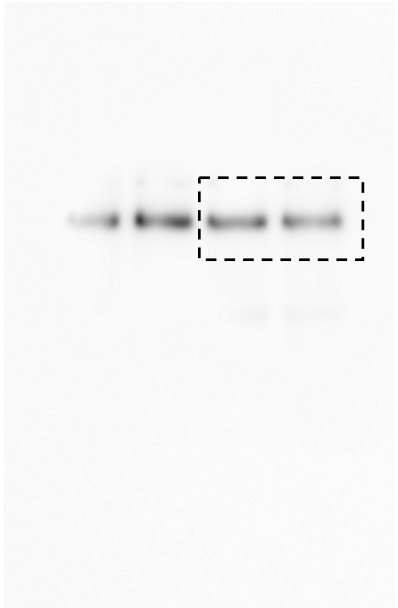

$\alpha$  BAK1
