# Supplementary material for: Perception of a conserved family of plant signalling peptides by the receptor kinase HSL3
Source: eLife journal article supplement (doi:10.7554/elife.74687), 2022-05-26

Figure 3 a

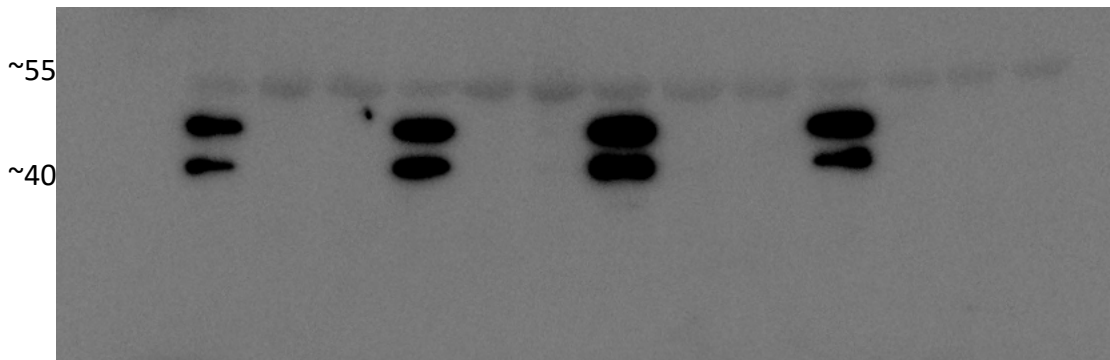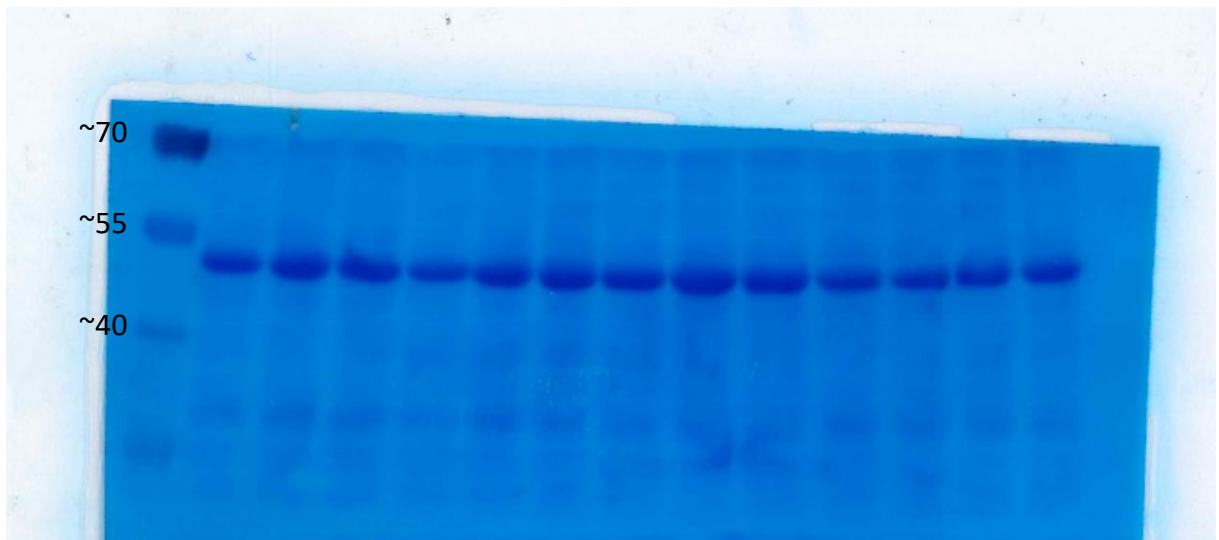

Supplement: fig3-data2 [file elife-74687-fig3-data2-v2.pdf]
