# Supplementary material for: Perception of a conserved family of plant signalling peptides by the receptor kinase HSL3
Source: eLife. 2022 May 26;11:e74687. doi: 10.7554/eLife.74687 (PMC9191895; doi:10.7554/eLife.74687)
Supplement: Figure 1—figure supplement 1—source data 1. [file elife-74687-fig1-figsupp1-data1.xlsx]

## Sheet: Sheet1
Time	CTNIP1	CTNIP2	CTNIP3	CTNIP4	Elicitor
5	0	0	0.1	0	flg22
10	0	0	0.2	0
30	0.4	0.7	1.2	0.4
90	4.5	3.2	6.2	6.8
180	2.5	1.5	5.1	5.3
5	0	0	0	0	elf18
10	0	0	0.1	0
30	0.4	0.6	1	0.5
90	1	1.5	7.1	3.2
180	0.2	0.1	3.9	0.5
5	0	0	0	0	pep1
10	0	0	0	0.1
30	0	0.1	0.4	0.3
90	1.9	0.2	2.8	5.8
180	0.7	0.1	0.2	2.7
5	0	0	0	0	nlp20
10	0	0	0	0
30	0.1	0.2	0.2	0.1
90	3.8	3.6	3.8	4.4
180	2.4	2.6	0.5	3
5	0	0	0	0	Ogs
10	0	0	0.1	0
30	0	0.1	0.1	0
90	0.9	0.5	4.3	2.5
180	0	0	0.2	0.1
5	0	0	0	0	CO8
10	0	0	0.1	0
30	0	0	0	0.1
90	0	0	1.2	0
180	0	0	0.1	0
5	0	0	0.2	0	3-OH-FA
10	0	0	0	0
30	0	0	0.1	0.1
90	0	0	1.4	0.2
180	0.1	0	0.5	0.3
