# Supplementary material for: Perception of a conserved family of plant signalling peptides by the receptor kinase HSL3
Source: eLife. 2022 May 26;11:e74687. doi: 10.7554/eLife.74687 (PMC9191895; doi:10.7554/eLife.74687)
Supplement: Figure 1—figure supplement 2—source data 1. [file elife-74687-fig1-figsupp2-data1.xlsx]

## Sheet: c
Mock	CTNIP4	CTNIP5	CTNIP4C58S	CTNIP4C68S	CTNIP4C58SC68S
-0.0569549	1.5762	-0.130035		0.0686514	-0.0981657
0.161792	2.0534	-0.187767	0.194218	0.0980534	0.073615
0.0833795	2.14596	0.514643	0.378718	0.246548	-0.110091
-0.0075329	2.58176	0.149763	0.148708	0.0293025	-0.0938076
-0.0726412	2.20376	-0.0068232	0.409827	0.131466	-0.148146
-0.102336	1.68307	-0.0610287	0.344721	0.172459	0.154039
0.131389	2.1329	-0.057287	0.416862	0.095091	0.0105363
0.160267	1.38384	-0.0112798	0.246996	-0.0485243	0.0930566
