# Supplementary material for: Perception of a conserved family of plant signalling peptides by the receptor kinase HSL3
Source: eLife. 2022 May 26;11:e74687. doi: 10.7554/eLife.74687 (PMC9191895; doi:10.7554/eLife.74687)
Supplement: Figure 1—source data 1. [file elife-74687-fig1-data1.xlsx]

## Sheet: a
Time	CTNIP1	CTNIP2	CTNIP3	CTNIP4	Elicitor
5	-0.10633	-0.00565	0.318393	0.054942	flg22
10	0.330126	0.008016	0.433146	1.64895
30	4.86221	0.488953	2.53703	7.28881
90	1.32294	0.029503	4.39195	5.37316
180	0.642609	0.014118	4.61913	4.44341
5	-0.08278	-6.4e-06	0.101321	0.103543	elf18
10	0.335595	0.002834	0.410163	1.94513
30	4.68669	0.415393	3.30531	7.24951
90	0.177891	0.016225	5.07008	1.80161
180	0.080215	2.13e-05	4.06357	0.848861
5	-0.04536	3.17e-05	0.012391	0.403547	pep1
10	0.399821	-0.00312	-0.11905	1.55799
30	2.72519	0.06012	1.64282	5.10745
90	0.469682	-0.00286	1.7658	3.47347
180	0.247203	-0.00244	0.619664	1.95134
5	0.106174	0.005651	0.172063	0.304444	nlp20
10	0.225074	0.005655	0.290105	0.850916
30	4.0875	0.314392	2.03815	5.94749
90	1.35923	0.057813	2.33968	3.31162
180	1.17441	0.067988	0.34276	2.6087
5	-0.09919	-0.00563	0.005101	0.266767	Ogs
10	1.07779	-0.00021	0.481016	1.94825
30	3.64286	0.177563	2.51534	5.14307
90	0.332828	0.005449	3.41099	0.442255
180	0.031456	-0.00562	1.45407	0.091588
5	0.005012	-0.00567	-0.42163	-0.1138	CO8
10	-0.05012	-0.00566	0.306741	0.690078
30	1.80333	0.052576	0.765959	3.87378
90	-0.09981	-0.00564	2.10085	0.161482
180	-0.08404	-0.0056	1.20677	0.10966
5	0.025993	0.005638	0.483464	0.290393	3-OH-FA
10	-0.06959	0.002446	-0.1401	0.030406
30	2.13895	0.039747	1.40129	3.96634
90	-0.01379	-2.9e-06	1.7162	0.314802
180	0.145311	7.3e-06	1.66438	0.427632

## Sheet: c
	mock								CTNIP1								CTNIP2								CTNIP3								CTNIP4
-5	0.158555	-0.214264	0.0647793	0.109522	-0.0295492	0.0168575	0.586902	-0.135424	0.0294833	0.384332	0.0449285	-0.0549514	0.101926	-0.0624559	0.27145	0.550056	-0.031415	0.0570704	-0.109851	0.0306166	-0.0416757	-0.0203803	0.186858	0.119172	0.0164315	-0.0554964	-0.0447612	0.0244413	-0.123104	-0.0624	0.196423	-0.067116	-0.0091348	-0.019013	0.0722138	0.110371	0.0292591	-0.114364	-0.0695179	-0.0247394
-4.5	-0.0902973	-0.0632096	-0.0023897	-0.0610089	0.239753	0.111503	0.160826	-0.0558916	0.0212753	-0.014289	-0.159259	0.0379791	-0.0605749	-0.174522	0.0959684	-0.0355718	-0.178109	0.0925948	-0.0691131	-0.0307143	-0.0368688	0.114639	-0.0171874	0.168806	-0.0924396	-0.0833004	-0.006146	0.0243281	0.066545	0.0286136	0.0775678	0.0757085	-0.0710874	0.135248	-0.0684771	0.0418453	-0.0364388	0.257172	0.201996	-0.228502
-4	-0.030045	0.0359796	-0.0648743	-0.0777416	0.0256614	0.0706945	-0.0115106	0.0866081	-0.0378086	0.00140911	0.306512	-0.0340934	0.0399403	0.0277523	0.0805535	-0.0254296	0.254553	-0.0550382	-0.0844581	0.118529	-0.0908998	-0.235565	-0.202912	0.173276	0.185149	1.02989	-0.110187	-0.0348629	0.0918661	0.0465251	0.0422004	-0.154475	0.0756393	-0.0799793	-0.196436	-0.0909822	-0.0630385	-0.0419646	0.184218	-0.209521
-3.5	-0.116151	-0.0116012	-0.181226	0.0121744	0.037293	-0.0361469	-0.133818	0.0895501	-0.0310721	-0.0216082	-0.0968348	0.0239599	-0.148096	-0.0354829	-0.0777411	0.252143	-0.210308	0.0163398	0.0888457	-0.0912475	-0.324146	-0.0171784	0.125115	-0.145832	-0.12704	-0.179765	0.104426	-0.051034	-0.0464092	-0.0009149	-0.106553	-0.067536	-0.0089849	-0.197006	0.149738	-0.101479	-0.128009	0.160983	-0.168036	0.102616
-3	-0.0396424	-0.0965779	0.0716288	0.00579976	-0.016154	-0.0599122	-0.141719	-0.142947	0.0282826	-0.0340081	0.025027	0.0199544	-0.115307	0.0569135	-0.253389	-0.167878	0.101594	-0.102989	0.0658986	-0.202303	0.260065	0.0268602	0.0633432	0.0591646	0.0578719	-0.197685	-0.139773	0.130269	0.170332	-0.0546494	0.118374	-0.101869	-0.0213051	0.0561633	0.0884756	0.0124212	0.0191696	0.0538373	0.0469007	0.187403
-2.5	-0.127765	0.105385	-0.107916	-0.0234962	-0.105054	0.0668001	-0.171688	-0.0949278	-0.0489883	-0.0240363	-0.0409244	-0.0639822	0.419459	-0.0668493	0.519715	-0.1303	-0.240733	-0.0679365	-0.068831	0.280033	-0.0754733	0.00854469	0.194369	0.148376	-0.0038678	-0.177842	-0.125055	-0.0415496	-0.0896824	-0.0330136	-0.0746008	0.180141	0.0513864	0.0921387	-0.0063381	-0.0641311	-0.173797	-0.130158	0.0646112	0.0627179
-2	-0.204248	-0.0227185	-0.0136648	-0.0862986	-0.0149915	-0.0149189	-0.0786859	-0.0826978	-0.0267754	-0.0538466	0.0528559	-0.0591514	0.0598262	0.228007	-0.121262	-0.297366	0.01026	-0.123254	0.194987	-0.0928366	0.286431	0.140959	-0.0547523	-0.106807	0.0214413	-0.0770921	-0.0263867	-0.0010066	-0.105777	0.142484	0.062554	0.0619456	-0.0541316	0.00066013	-0.0046385	0.0387362	0.0802761	0.0215362	-0.133722	0.128045
-1.5	0.217263	0.0386149	-0.0297201	-0.0102525	0.0234487	0.0837061	-0.123178	-0.0763742	0.0840921	-0.0237907	0.0625362	0.00328587	0.063453	-0.0367004	-0.183102	-0.236015	0.145222	0.227472	0.0897932	0.146297	0.0972264	-0.205579	-0.142908	-0.0697605	-0.10279	-0.0468395	-0.0623518	-0.0736955	0.103331	-0.0560122	-0.004453	0.155173	-0.110446	0.0345384	-0.213201	0.0578487	0.00761459	0.0428243	-0.0151131	0.147415
-1	0.249465	0.0145573	0.103211	0.190219	-0.0581974	-0.0852912	0.0474638	-0.0836064	0.0707019	-0.105193	-0.117295	-0.0788319	-0.189125	0.0636142	-0.178547	0.231744	-0.054725	0.053077	-0.0317552	-0.0140754	-0.0538933	0.228553	-0.0677294	-0.145736	0.0267482	-0.119765	0.479424	0.0514939	0.00533292	-0.002766	-0.21086	0.0081787	0.0435725	0.076805	0.0560107	0.112009	0.0795012	0.00138738	-0.0267545	-0.187056
-0.5	-0.017133	0.213835	0.160172	-0.0589173	-0.102211	-0.153291	-0.134593	0.49571	-0.0891909	-0.108969	-0.0775464	0.205831	-0.171502	-0.0002765	-0.153646	-0.141382	0.203662	-0.0973366	-0.0755164	-0.144299	-0.0207648	-0.0408527	-0.0841962	-0.20066	0.0184955	-0.092099	-0.0691892	-0.0283839	-0.072435	-0.0078664	-0.100653	-0.090151	0.104492	-0.0995555	0.122653	-0.116639	0.185462	-0.251253	-0.0845822	0.021622
0
0.5	-0.0009987	0.914156	0.109821	0.320579	1.07919	0.0243694	2.07607	0.0780707	0.8844	6.07993	0.584852	0.373961	0.463196	0.524892	2.32428	0.0177131	0.778406	1.2896	0.510871	0.222803	1.57813	0.110105	1.49168	1.50085	1.05049	-0.114062	2.70796	0.252336	0.0290399	0.0736272	0.102362	-0.165518	0.972242	0.0270915	2.02118	0.200837	0.508398	-0.12715	0.688913	0.0781759
1	-0.18664	0.984066	0.0224892	0.147906	0.048299	-0.0829293	0.0796983	-0.0866984	0.206419	3.07021	1.28096	0.898304	0.0472712	0.163379	0.4715	0.0309978	0.21186	0.73555	0.148198	0.654268	0.0693894	0.0831585	0.220362	1.17349	1.34559	2.16527	1.12557	0.159904	0.453819	0.251455	-0.0068341	-0.016853	0.656605	0.0241313	1.68112	0.0106249	0.355919	1.72008	0.674304	-0.0125435
1.5	-0.222917	0.0597217	0.0779441	0.0192839	-0.0218457	-0.185861	-0.108578	-0.0850682	0.259875	1.43763	0.678879	0.691605	-0.0412743	0.127053	0.693837	0.12249	0.492208	0.463217	0.235677	0.354227	0.276242	0.8068	0.354324	0.649635	2.53557	-0.0737892	0.588262	0.430723	1.12894	0.171768	1.11489	-0.0746541	1.08416	-0.0070979	0.749916	0.8034	0.519189	-0.178463	0.151779	-0.051176
2	0.0343799	0.196147	0.0415432	0.00951712	-0.0737368	-0.199851	-0.115975	0.0213172	0.582261	1.36039	0.501161	0.309135	0.0910185	0.267687	0.218634	-0.0637789	1.37343	0.880727	0.940649	0.927595	1.98541	1.04797	0.715137	0.386162	3.96793	0.160577	0.546124	0.784785	1.39776	0.495053	2.93288	0.767171	1.13161	-0.0884733	0.843489	1.06611	0.142658	-0.0182788	-0.031152	-0.0501153
2.5	0.477782	0.0411594	-0.0191682	0.13958	-0.112904	0.254831	0.0383055	-0.185267	1.0089	1.68942	0.671173	0.332209	0.384573	0.318035	0.199245	-0.105379	1.89912	0.739786	0.991986	1.60151	3.5652	1.70727	0.60451	0.588942	4.528	1.03953	0.411155	1.78505	4.0886	1.64097	4.82935	2.13532	1.34295	0.161285	1.07499	3.24743	0.59531	0.353553	0.447982	-0.164832
3	-0.125904	0.230638	-0.104505	0.345674	-0.0119514	-0.0332267	-0.133398	-0.139784	0.866113	1.45617	0.908	0.385094	0.44349	0.390986	0.233504	-0.0624912	4.18842	1.62705	1.638	2.52972	2.98227	1.71474	0.310922	1.252	3.99129	1.43619	0.812227	2.6204	4.19054	3.27203	5.69258	4.02446	1.1457	0.0470264	1.04318	2.45907	0.912145	0.51651	0.598122	-0.0116288
3.5	-0.138118	0.0601417	-0.186089	-0.0943353	-0.215339	-0.204213	-0.234365	-0.283241	1.0803	1.9475	0.713611	0.4068	0.431042	0.896761	0.537324	0.150766	6.84573	2.0745	2.07048	2.50893	4.3747	2.67273	0.394122	1.3528	4.33447	1.51081	1.11981	3.43677	5.64988	4.42804	5.86782	3.97803	1.81866	0.225436	1.39227	3.37057	1.09078	0.466458	0.549931	-0.0101558
4	-0.250879	0.00211039	-0.0810832	-0.0591111	-0.105559	-0.127631	-0.225892	-0.237611	1.1525	2.00274	0.885695	0.530297	1.02864	1.022	0.288028	-0.124249	7.20541	2.19602	2.36974	2.91435	4.16571	2.86873	0.623466	1.321	5.60054	1.55849	1.57382	3.67984	6.05055	4.89393	5.48551	3.75355	1.1678	0.192114	1.24544	3.70346	1.36461	0.646542	0.726482	0.2021
4.5	-0.0292157	0.175799	-0.244355	-0.158726	-0.0583714	0.0343608	-0.201733	0.17229	1.67534	1.82227	0.843374	0.856475	0.608288	0.83293	0.253466	0.281138	8.62352	2.42671	3.07083	3.03878	5.26977	3.58159	0.716201	1.58704	5.65981	1.74897	1.16119	4.21482	5.8613	4.71834	5.04603	3.37335	1.3786	0.473101	1.83748	5.16876	1.56747	0.913441	0.934114	0.34497
5	-0.22474	0.163825	-0.057641	0.215688	0.134197	-0.0592386	-0.267141	-0.149745	1.8732	1.53633	1.18229	0.731374	0.963105	0.878868	0.796264	0.597221	10.1245	2.65112	3.30471	3.79668	7.38922	4.06658	1.25696	1.56583	6.05707	1.52532	0.934882	4.71972	6.21604	4.71808	4.82992	2.55964	2.02971	0.363732	2.09685	6.72314	1.74757	1.20344	1.07874	0.197058
5.5	-0.233243	0.214541	-0.238283	-0.0250811	-0.0035058	-0.228714	-0.216591	-0.186764	2.45075	1.73681	1.23522	1.00826	1.76078	1.10504	1.14242	0.638079	10.7061	3.30595	3.70324	4.80795	10.1888	3.8964	1.69199	2.44415	6.70124	1.60769	1.35164	4.75608	5.38532	4.97554	4.24329	2.45841	1.86645	0.672161	2.55347	6.82126	2.07587	1.09373	1.54459	0.216963
6	-0.3444	0.185458	-0.08674	-0.0724459	-0.0797166	-0.182132	-0.0196754	-0.126129	2.70403	2.27337	1.7202	1.59409	1.83941	1.4958	1.25247	0.84803	10.557	3.51795	4.27812	4.69229	12.3467	4.36472	1.78028	2.51593	7.51984	1.3683	1.27629	5.01324	5.86204	4.94912	4.16283	2.12182	2.58815	0.778116	2.27761	5.98106	3.14863	1.82444	1.47773	0.472162
6.5	-0.0515577	-0.0721277	-0.224856	-0.122195	-0.177661	-0.257239	-0.0624993	-0.0468205	2.9699	2.8371	1.71099	1.84019	2.15162	1.80239	1.28201	1.56175	10.9757	3.49314	4.13952	5.24974	13.1649	4.85509	2.37848	2.64079	6.95357	1.62263	1.1647	4.53521	6.80189	4.6947	3.70849	1.94002	2.92953	0.950006	2.53497	5.02135	3.1354	2.06571	1.57069	0.912438
7	-0.30011	-0.0583165	-0.151654	-0.036498	-0.0181161	-0.110655	-0.114529	0.141331	3.03201	3.0048	1.74509	2.0222	2.37547	1.81762	1.3879	1.64122	10.5091	3.66257	4.44979	5.84505	12.7262	4.55039	2.30236	2.87025	6.69968	1.73656	1.4463	4.53459	6.65701	4.52116	3.98674	1.40849	3.40693	1.17269	3.3635	4.27579	3.06178	2.14254	1.84957	0.720066
7.5	-0.245467	-0.133632	-0.0131877	-0.0828424	0.480325	-0.075633	-0.158652	0.103097	3.29878	3.19203	2.32806	2.49665	3.02241	1.90841	1.40832	1.84779	11.3232	3.69902	4.5954	6.01093	11.7416	4.60975	2.8299	3.0548	5.90184	1.64176	1.4233	4.1012	5.30193	4.34189	3.14795	1.23872	3.53136	1.57459	3.24807	4.06521	3.14786	2.7963	1.72863	0.742147
8	-0.280728	-0.066325	-0.131729	-0.189879	-0.0918055	-0.152999	-0.0639455	-0.104389	2.83779	3.82974	2.40121	2.95168	2.98263	2.927	1.63141	1.9417	9.52233	3.34904	4.16656	5.46834	10.258	4.43393	2.62077	3.62165	5.38781	1.75009	1.31509	3.80846	5.4402	3.57949	3.32407	1.01852	3.86529	1.86482	3.76764	3.48672	3.36224	3.69566	2.06795	0.995986
8.5	-0.262058	-0.0144434	-0.185583	-0.245183	0.0886251	-0.12504	-0.0141548	0.0134872	3.2242	4.29867	3.09423	2.83882	3.49156	2.39893	1.98163	2.2736	8.39708	3.57955	3.7403	5.14893	7.96076	4.15403	2.38584	3.5383	4.75852	1.5306	1.41233	3.43912	4.87266	3.5663	2.91653	1.20271	3.65366	1.87872	3.77304	3.10903	3.63332	4.39145	2.05053	1.28971
9	-0.180734	-0.0965183	-0.171279	0.0526699	1.05104	-0.143184	-0.243896	-0.0470343	3.48293	4.49415	2.3866	3.15712	3.83225	2.76547	1.90849	2.39018	7.96682	3.55979	3.82873	4.6285	6.37387	3.83596	2.59168	3.12032	4.93269	1.36075	1.41632	3.22326	4.01675	3.42501	2.85638	1.1783	3.42707	1.93123	3.7881	3.10928	3.20361	3.86459	2.24367	1.24907
9.5	-0.188863	0.262051	-0.0213755	-0.0928082	-0.148289	-0.204135	-0.190971	-0.0977685	3.37146	5.79294	3.41705	3.15355	3.62363	2.89347	2.05077	2.52192	7.02221	3.80594	3.26781	4.3137	4.91611	4.01837	2.36341	3.18391	4.76248	1.51386	1.47709	2.95117	4.76208	2.92567	2.68702	0.799273	3.90301	1.84054	3.43917	2.85299	3.3078	3.24246	1.54606	1.54591
10	-0.174769	-0.039966	-0.136597	-0.0411697	-0.0830886	-0.0491745	-0.02415	0.106671	3.24849	5.38864	2.71582	3.19209	2.84148	2.89839	2.36137	2.01711	6.08164	3.9759	3.41532	3.77237	4.28335	3.66105	2.16755	2.83387	4.6546	1.34253	1.58049	2.65282	3.60673	2.62002	2.45176	0.872474	3.85208	2.29923	3.29957	2.90681	3.22912	3.04068	2.05217	1.41959
10.5	-0.144667	0.0461953	-0.131811	-0.0702783	-0.0463411	-0.0749164	-5.135e-05	-0.110308	3.10041	5.82834	2.88623	3.45988	3.41233	2.4283	1.81935	2.00551	4.86477	4.03719	2.95333	3.66906	3.77721	3.06039	2.26507	2.8734	4.04217	1.41767	1.49029	2.39073	3.74465	2.34866	2.12736	0.740629	3.49253	2.64409	3.45572	2.30291	3.17969	3.06021	2.28274	1.19266
11	-0.130624	-0.0766742	-0.160534	-0.127537	-0.0981705	0.0980068	-0.129426	-0.118279	3.24649	5.71487	3.35449	3.17891	3.0511	3.3184	1.66741	2.17646	5.16809	3.42533	2.86058	4.01898	3.47699	3.46746	2.4793	2.38228	3.28961	1.12879	1.2723	2.07847	3.32553	2.32693	1.77262	0.762063	3.50099	2.27928	3.26595	2.39466	3.22965	2.41031	1.60021	1.24921
11.5	-0.163475	-0.0334329	0.00601933	-0.0730864	0.0426398	-0.164891	-0.0549661	0.129433	3.34618	5.33827	3.27575	3.07565	3.27067	2.86952	1.85322	2.21575	4.52257	3.34885	2.91936	3.47414	2.82965	2.79988	1.9417	2.43828	3.23233	1.06603	1.39692	2.03071	3.1886	2.05647	1.936	0.50867	3.68653	2.30549	3.09306	2.20452	2.97105	2.07843	1.79154	1.40219
12	-0.260125	0.107236	-0.069808	0.178328	-0.0581248	-0.0622817	-0.127454	-0.0074705	3.00962	4.95044	3.35027	2.889	2.46505	2.68747	1.75405	2.05088	3.87417	3.1673	2.66842	2.59464	2.66779	2.70969	2.15924	2.27088	2.82781	1.22251	1.40128	1.74254	2.42444	1.7009	1.64623	0.484896	3.16562	2.25536	2.26176	2.10031	2.76035	1.59363	1.61063	0.99313
12.5	-0.181899	0.0585969	0.0846103	0.0145941	0.0271356	-0.0919704	-0.142468	0.0337435	2.83543	5.35851	3.36692	3.12875	2.3961	2.76124	1.65232	1.60717	2.82636	3.10964	2.11732	2.31011	2.13291	2.22932	1.6341	2.07792	3.13959	1.03286	1.27325	1.44878	2.56117	1.46118	1.40865	0.367021	3.08462	2.35345	3.1559	2.62742	2.90079	1.59128	1.79184	1.2641
13	-0.0807084	-0.166035	0.0250821	0.116232	0.0341695	0.0985728	-0.0674836	0.0373244	3.05255	5.16149	3.73368	2.74843	2.6503	2.28469	1.38792	1.54868	3.62245	2.34963	2.21139	2.10026	2.0608	1.78174	1.69017	2.00532	2.15445	0.980518	1.14425	1.43489	2.24166	1.27032	1.20171	0.29635	2.68863	2.09061	2.35206	2.07776	2.38161	1.72671	1.6807	1.24339
13.5	0.0433291	0.076133	-0.0147711	-0.121497	0.0457098	-0.0491381	0.0109407	-0.175854	2.58995	4.53671	3.75952	2.4287	2.46127	2.48408	1.60741	1.69221	3.06891	2.09215	2.22062	1.94703	1.80803	2.33212	1.09087	1.82317	2.34375	0.868014	1.09521	1.23859	2.01878	1.03689	0.86064	0.324049	2.8362	2.1079	2.46914	2.168	2.57458	1.52451	1.68552	1.21315
14	-0.0788757	-0.120818	-0.264809	-0.0546203	-0.0336295	0.0364484	-0.111569	-0.184372	2.5091	4.44892	3.9451	2.45511	2.29485	2.29488	1.31693	1.36969	3.03874	2.2348	1.86742	1.72881	1.79062	1.84422	1.38259	1.55887	2.10206	0.687805	1.00437	1.06062	1.93778	0.842941	1.04823	-0.0476638	2.58082	2.10263	2.06598	2.28916	2.21378	1.33578	1.51682	1.03008
14.5	-0.240114	-0.0656165	-0.0682364	-0.0440538	-0.0642093	-0.0032057	-0.0577075	-0.0327574	2.5066	4.01733	4.03796	2.52542	1.82237	2.61696	1.99664	1.1634	2.53948	1.86772	1.62934	1.87105	1.46389	1.70655	1.40737	1.22712	1.55081	0.641644	0.909865	1.06136	1.38352	0.807639	0.658021	-0.0370664	2.45668	1.8142	1.96455	1.80964	2.08791	1.10117	1.47196	0.878808
15	-0.12154	-0.0812208	-0.0137645	-0.017623	0.0198182	0.0389151	-0.0625786	-0.0022394	2.35816	3.66355	3.80496	2.33831	2.33888	2.38652	1.26926	1.01281	2.02888	1.75653	1.61902	1.20478	1.58005	1.73903	0.974333	1.27422	1.44944	0.515754	0.996732	1.12828	1.32481	0.807104	0.445883	-0.0727837	2.47625	1.78663	1.60423	2.19027	1.99901	1.13811	1.14005	0.989475
15.5	-0.0863829	-0.202863	-0.0389432	0.355267	0.0908259	0.00579907	-0.201215	-0.193678	2.08828	3.56934	3.01653	2.09404	1.77875	2.08773	1.19937	0.883138	1.76835	1.4763	1.56348	1.52946	1.25712	1.27487	1.11816	1.04871	0.950293	0.580618	0.913379	0.925703	1.4493	0.542345	0.7081	0.0494738	2.17616	1.53764	1.68154	1.85749	1.55668	0.871758	1.45202	0.701484
16	-0.155525	-0.121869	0.0483566	0.10564	0.00839505	-0.0544454	-0.0405795	0.11853	2.11712	3.19106	2.84895	1.97249	1.67889	2.34326	1.0744	1.41922	1.51262	1.4448	1.31987	1.56327	1.21482	1.06069	0.997836	1.04589	1.4228	0.418595	0.723241	0.702796	1.55358	0.584297	0.453064	-0.141535	2.11755	1.62741	1.36066	1.85049	2.10085	0.983414	1.53163	0.840408
16.5	-0.0111893	-0.088298	-0.111409	0.0266986	0.0567877	0.703484	-0.0480673	0.247984	1.68398	3.01684	2.78044	1.7734	1.42028	1.8658	1.07184	0.774811	1.4826	0.98167	1.04274	1.05764	0.723834	0.916392	0.890106	1.04815	1.29399	0.468335	0.804765	0.595614	1.10179	0.554911	0.418093	-0.177193	1.96386	1.23486	1.47998	1.71671	1.57654	0.761775	1.0329	0.783893
17	-0.186332	-0.0677309	-0.129221	0.0324342	0.00386093	-0.18826	-0.192372	-0.0187544	1.74656	3.35652	2.72937	1.4661	1.4682	1.46037	1.0585	1.20502	1.35174	1.01079	0.848157	1.17826	1.23892	1.2247	0.564157	0.981157	0.896023	0.380726	0.696798	0.265554	0.737798	0.386371	0.314815	-0.251861	1.84389	0.957975	1.7662	1.55811	1.47978	0.496686	1.29598	0.929697
17.5	-0.231251	-0.0190775	-0.135187	2.11642	0.102363	-0.0692923	0.0125153	0.083362	1.72687	2.91395	2.76969	1.43709	1.38605	2.15118	1.06841	1.24695	1.59784	0.743045	1.05531	0.943836	0.71426	0.861917	0.437258	0.644741	0.928656	0.319132	0.52529	0.593334	0.927886	0.296875	0.307789	-0.205685	1.91038	1.53624	1.48424	1.42143	1.33227	0.780505	1.12946	0.590258
18	-0.236061	-0.134508	-0.130828	-0.0943968	-0.0021928	-0.102154	-0.250568	-0.006936	1.21975	2.29917	1.98215	1.50898	1.13922	2.14334	0.971173	0.459092	0.84715	0.600371	0.685137	1.06162	0.679027	0.591478	0.161144	0.498943	0.671106	0.233437	0.59092	0.430073	1.03945	0.323854	0.213347	-0.12005	1.60866	1.01211	1.00795	1.6339	1.16993	0.33259	0.92771	0.805271
18.5	-0.282419	-0.0703456	-0.207448	-0.151214	-0.0757219	0.0514096	-0.113502	0.128691	1.1246	2.24517	2.02125	1.27983	1.4101	1.99213	0.843754	0.848077	1.24929	0.746903	0.770149	0.802766	0.818412	0.48986	0.279937	0.600175	0.945115	0.0971123	0.468598	0.350073	0.987329	0.26433	0.340416	-0.275865	1.3209	0.978346	1.26193	1.07864	1.11001	0.348717	0.978416	0.470809
19	-0.149812	-0.099312	-0.159515	-0.100552	0.0670642	0.0767309	-0.100845	0.231422	1.10327	2.04625	1.97668	1.12568	1.13003	1.61502	0.54819	0.276701	1.3791	0.712203	0.666651	0.857568	0.709668	0.346554	0.107271	0.621517	0.836544	0.181308	0.444501	0.254354	1.07022	0.325121	0.133442	-0.25431	1.53239	1.1017	0.887754	1.33955	1.10753	0.172994	1.06433	0.425138
19.5	0.00187491	0.448824	-0.140411	-0.0703905	-0.0023654	0.054676	1.49007	-0.0125479	1.07272	2.44141	1.70023	0.731179	0.817142	0.784498	0.707277	0.523297	0.971824	0.580731	0.548222	0.818338	0.627056	0.598638	0.0964131	0.422568	0.913903	0.0979479	0.46595	0.213108	0.777483	0.142819	0.170818	-0.193158	1.12065	1.06193	0.806475	1.17756	1.09358	0.3723	0.844024	0.562186
20	-0.202387	0.148724	-0.17821	0.0383725	-0.0808909	-0.0928791	-0.222663	-0.260968	0.953922	1.45945	1.60764	0.64685	0.813623	1.51693	0.616056	0.532899	0.964438	0.389465	0.394149	0.650922	0.467776	0.502165	-0.0230796	0.285935	0.574733	0.109869	0.165403	0.178432	0.865468	0.231352	0.212796	-0.294896	1.24683	0.815417	0.651344	0.939587	1.14519	0.0731642	0.92571	0.211096
20.5	-0.298118	-0.205387	-0.0693254	0.0331724	-0.0903352	-0.194356	-0.0720073	-0.142543	0.971476	1.7379	1.48043	0.690734	0.923724	1.31779	0.528369	0.287394	0.991424	0.496363	0.537642	0.94549	0.710586	0.356118	-0.0086173	0.499106	0.514016	-0.222492	0.117363	0.0484861	0.906195	0.225932	0.0478234	-0.337445	1.31103	0.945259	0.903404	0.80395	0.821979	0.0364284	0.647037	0.246972
21	-0.235812	-0.314197	-0.177498	0.0147172	-0.0237907	-0.0354597	-0.234913	0.130969	0.634382	1.62948	1.33662	0.552619	0.281462	1.00734	0.422062	0.411215	1.12761	0.307458	0.521146	0.5636	0.54043	0.410774	0.0921778	0.204839	0.567094	-0.138839	0.0837443	0.0724	0.816772	0.167195	-0.0986289	-0.239494	1.07205	0.901402	1.16819	0.895895	0.841836	0.188785	0.502352	0.204371
21.5	-0.0565441	-0.0929103	-0.190577	-0.117582	-0.0980226	0.0102391	-0.0340318	-0.194974	0.735381	1.11502	1.26933	0.556489	0.403465	1.08266	0.423829	0.549813	1.48389	0.55856	0.155846	0.802186	0.62384	0.336598	0.00920584	0.131312	0.473442	-0.161717	0.141831	-0.0840188	0.634653	0.136555	0.00751521	-0.492488	0.635267	0.648435	0.469165	0.783029	1.08204	-0.0167273	0.529164	0.27772
22	-0.196447	-0.0016546	0.0780795	-0.183644	-0.0076917	-0.0967999	-0.146637	-0.0183669	0.644576	1.35031	1.10433	0.328939	0.924384	0.95327	0.45048	0.167323	1.16054	0.149531	0.183464	0.62662	0.371325	0.375768	-0.223674	0.175701	0.446523	-0.223378	0.220074	-0.0649692	0.319149	0.00604062	-0.09288	-0.329372	0.673088	0.757608	1.06892	0.867538	0.781727	0.400959	0.382445	0.0613718
22.5	-0.0794773	-0.0736104	-0.161773	-0.0070347	0.00069846	-0.0988719	-0.0700174	0.138345	0.693378	1.28691	1.14453	0.187718	0.307906	0.624566	0.511824	-0.0850392	0.553358	0.332113	0.386578	0.72211	0.417732	0.198741	-0.0143581	0.0331402	0.43636	-0.165141	0.0646831	-0.133942	0.582155	0.187272	-0.181127	-0.30338	0.816142	0.698652	0.821064	0.565207	0.643848	0.11446	0.373139	0.0508548
23	-0.183839	0.0268844	-0.0478109	-0.105915	0.0221392	-0.127626	-0.119294	-0.0534078	0.647086	1.08635	0.916925	0.325434	0.469233	0.554742	0.246031	0.30013	0.601335	0.209249	0.31467	0.471191	0.44066	0.253383	0.109271	0.15582	0.404758	-0.302034	0.0482057	-0.12371	0.484565	0.141201	0.258134	-0.373003	1.08501	0.509841	0.433738	0.527795	1.11954	0.0178278	0.734317	0.120927
23.5	-0.200541	-0.0445381	-0.132774	0.0283777	0.0212484	-0.164751	-0.147668	-0.107088	0.573889	1.31419	0.999909	0.364536	0.39672	0.894091	0.450527	0.215948	0.981856	0.3002	0.171904	0.81332	0.516406	0.158089	-0.0082295	0.0168404	0.221913	-0.264865	0.113155	-0.197588	0.569297	0.330649	-0.0992023	-0.39611	0.541482	0.569806	0.554923	1.69661	1.11227	-0.181069	0.722868	0.0519542
24	-0.020965	-0.173999	-0.17741	-0.200091	0.24939	-0.110411	0.0183417	0.0650365	0.584872	0.776915	0.812622	0.244882	0.321413	0.697991	0.410459	0.00227463	0.720225	0.358983	0.15742	0.46022	0.43694	0.307876	-0.0351544	0.0377562	0.225587	-0.262118	0.00596971	-0.135557	0.576358	0.082516	-0.302225	-0.361575	0.680693	0.40846	0.551522	0.693732	1.10257	0.140447	0.497705	0.0402133
24.5	-0.215082	-0.079519	-0.195101	-0.0050046	-0.0185692	-0.113407	0.0332608	0.156664	0.486552	0.897943	0.965421	0.122282	0.390936	0.435454	0.345367	-0.154089	0.583643	0.259938	0.0556543	0.5598	0.669383	0.0617189	-0.282315	-0.0176841	0.207494	-0.260915	-0.0221472	-0.226219	0.397851	0.110925	-0.160655	-0.320125	0.730229	0.418256	0.259478	0.584087	0.808979	0.140542	0.532446	0.0798206
25	-0.143159	-0.288013	0.0460344	-0.121837	-0.0536	-0.1015	-0.207952	0.0240563	0.569907	0.963382	0.583716	0.171993	0.296867	0.504989	0.54757	0.347773	0.675579	-0.0890987	-0.0727186	0.480867	0.526616	0.444243	-0.212922	0.0324985	0.158506	-0.481071	0.144486	-0.204629	0.512212	0.047556	-0.237551	-0.375414	0.588913	0.614525	0.406103	0.450525	0.859561	-0.126417	0.33139	0.0516536
25.5	-0.17287	-0.231804	-0.277121	0.0275454	-0.0369307	-0.0319076	-0.0651274	-0.0052324	0.213594	0.551742	0.545272	0.0193168	-0.0014211	0.475539	0.334897	-0.141868	0.260684	-0.0314068	0.121075	0.57909	0.523425	0.203796	0.0992569	0.031718	0.53086	-0.293749	-0.103395	-0.0621932	0.221714	0.0692128	-0.281745	-0.50088	0.195541	0.379382	0.494643	0.267284	0.891733	-0.191615	0.356252	0.0107708
26	-0.205928	-0.192806	-0.0833377	0.103371	-0.076212	0.191487	-0.0764781	-0.254394	0.369046	0.583598	0.593134	0.206354	0.156982	0.0575082	0.393812	-0.196636	0.378772	-0.0514954	0.149956	0.357377	0.546647	-0.0904134	0.0345719	-0.0195708	0.301016	-0.361724	-0.15437	-0.253799	0.296489	-0.0941554	0.0385919	-0.464576	0.492926	0.400979	0.422793	0.484626	0.871356	-0.106541	0.42623	-0.291899
26.5	-0.073585	0.0471558	-0.0951015	-0.0620495	-0.002538	-0.127984	-0.168934	-0.0597012	0.670191	0.370688	0.252024	0.208666	-0.0756856	0.452314	0.414147	-0.181788	0.370409	0.0320793	-0.0383468	0.402231	0.430455	0.130103	-0.309392	0.0312535	-0.0222466	-0.371666	0.00626954	-0.200239	-0.0599885	-0.0669366	-0.255306	-0.462668	0.29231	0.234113	0.444295	0.405564	0.566717	-0.26131	0.352273	0.180688
27	-0.2499	-0.0009535	-0.167518	0.0577143	0.0326623	-0.15087	-0.159962	-0.18645	0.473237	0.403048	4.04572	0.0855733	-0.0491847	0.432001	0.327508	-0.210918	0.0165861	-0.0366013	0.0913632	0.41341	0.341163	0.142083	-0.244538	-0.221623	0.244659	-0.420103	-0.102304	-0.216241	0.212424	-0.131727	-0.307816	-0.36007	0.247419	0.0323497	0.341188	0.191542	0.580816	-0.389633	0.369967	-0.0980495
27.5	-0.107618	-0.141914	-0.152137	-0.0963256	-0.121772	-0.0524721	-0.100067	-0.0416763	0.264079	0.0921825	0.395365	0.0789205	-0.0107164	0.650219	0.253391	-0.0556858	0.323988	-0.178992	0.0146361	0.658389	0.3744	0.0966519	-0.143682	-0.240461	0.130895	-0.364995	-0.167479	-0.297947	0.21556	-0.015111	-0.358725	-0.35544	-0.0419343	0.38292	0.263172	0.310138	0.633719	-0.0609878	0.185832	-0.169448
28	-0.199555	-0.140852	-0.034605	-0.0136026	-0.093322	-0.0684199	-0.0003119	-0.054597	0.210379	0.450745	0.374885	0.155679	-0.0446552	0.41783	0.120952	-0.0285777	0.166767	-0.142909	-0.10479	0.138264	0.499438	0.15283	-0.328288	-0.17903	0.141906	-0.209907	-0.100016	-0.24068	0.218553	0.0312384	-0.317724	-0.36457	0.0603018	0.0331542	0.383827	0.1443	0.427138	-0.215033	0.471282	0.25237
28.5	-0.129718	-0.0372454	-0.0085758	0.0238435	-0.0174288	-0.138448	0.0427499	-0.0770446	0.429703	-0.0389267	0.33672	0.142322	0.247108	0.0803238	0.152045	-0.268865	0.00773967	-0.19645	-0.290888	0.561782	0.266218	0.269081	-0.25248	-0.246633	-0.117028	-0.439937	-0.255168	-0.309455	0.273638	-0.17749	-0.173185	-0.373561	0.0396191	-0.0441631	0.0731671	0.326798	0.562589	-0.185681	0.353658	-0.0800688
29	-0.142692	-0.125704	-0.0894948	-0.103798	-0.10509	-0.110613	-0.0024189	-0.0654467	0.393651	-0.0266553	0.131074	0.0418636	-0.0293884	0.271455	0.0959087	-0.033072	0.0487751	-0.316863	-0.176711	0.255203	0.262072	0.0426103	-0.138261	-0.182286	0.0581982	-0.440987	-0.277699	-0.278261	0.221121	-0.303359	-0.24582	-0.443305	0.0198465	-0.0445098	0.123504	0.362775	0.280382	-0.407348	0.166383	-0.0068019
29.5	-0.197543	-0.104702	-0.0207898	0.178477	0.084276	-0.0706062	-0.0115645	0.029087	0.385118	0.362243	0.146706	-0.0194418	0.39149	0.219767	0.630069	-0.298075	0.25405	-0.160348	-0.28152	0.36088	0.306768	-0.045113	-0.312652	-0.243736	-0.192341	-0.428409	-0.217999	-0.235779	0.00197279	0.224694	-0.313696	-0.463108	0.0297869	-5.734e-05	0.0853337	0.0658493	0.312737	-0.275966	0.299079	-0.289207
30	-0.182802	-0.0504139	-0.0386695	-0.0566504	-0.0490689	-0.185461	-0.131952	-0.0887961	0.248235	0.240281	0.311942	-0.0565654	-0.216703	0.41409	0.158073	-0.350896	-0.19138	-0.249897	-0.186775	0.317548	1.06975	0.0881005	-0.246556	-0.189129	0.0183271	-0.424052	-0.266828	-0.347653	0.151055	-0.0308719	-0.299873	-0.387702	-0.0817214	-0.19173	0.0153698	0.248789	0.176525	-0.391292	0.343356	-0.252623
30.5	-0.0679727	-0.0479453	-0.196469	-0.0381517	0.0236896	-0.0538378	-0.0877722	0.0881454	0.258586	0.0670696	0.134488	-0.132791	0.130489	0.25586	0.273866	-0.26349	0.0058742	-0.245028	-0.102546	0.0888784	0.401392	0.126489	-0.0433968	-0.197987	0.0339956	-0.442544	-0.185627	-0.136149	0.172209	-0.1138	-0.24933	-0.324684	0.130712	0.0066632	-0.166129	-0.0149907	0.169608	-0.227548	0.318982	-0.0025891
31	-0.239526	-0.0535326	-0.114467	-0.224297	0.0362686	-0.0529706	0.151685	0.0173488	0.647726	0.268601	0.270865	0.0501463	-0.322392	0.155107	0.103764	-0.24474	-0.193382	-0.270953	-0.251551	0.0970021	0.252073	0.131427	-0.163072	-0.211357	0.0523128	-0.316198	-0.233624	-0.274944	-0.0614699	-0.223279	-0.0361908	-0.514329	-0.14319	-0.0458877	0.0255179	-0.133586	0.301084	-0.156309	0.239169	-0.100029
31.5	-0.272778	-0.12188	0.151205	-0.107887	0.100036	-0.135659	-0.0137017	0.0448671	0.0730966	-0.0234656	0.272143	-0.213829	-0.0294373	-0.0390764	-0.0091808	-0.233821	-0.0188546	-0.201182	-0.320015	-0.0617098	0.750776	-0.0446974	-0.306004	-0.383232	-0.0838798	-0.243037	-0.217763	-0.298116	0.118	-0.217327	-0.412786	-0.545907	-0.0389241	-0.112315	0.335436	-0.0268578	0.205265	-0.345227	0.341188	-0.212032
32	-0.140234	-0.0515095	-0.193615	-0.108625	0.024078	-0.218172	-0.0359236	-0.18327	0.599719	-0.0172845	0.124801	0.00579585	0.0746031	0.210853	-0.0949521	-0.360068	-0.365754	-0.047897	-0.139355	-0.064121	0.124939	-0.0115442	-0.176249	-0.0641941	0.0109065	-0.242759	-0.25786	-0.156062	0.0953345	-0.121635	-0.461379	-0.353121	0.0102879	-0.022877	0.612875	-0.183895	0.196205	-0.199411	0.266633	-0.166713
32.5	-0.142606	0.0075005	-0.102445	-0.0533936	0.0511039	-0.0507532	-0.0514808	-0.0017718	0.866885	-0.158723	0.0480751	-0.206572	-0.22202	-0.0825441	-0.146264	-0.203021	-0.34689	-0.140845	-0.242694	-0.0423947	0.0968689	0.370668	-0.353808	-0.399886	-0.0955362	-0.348735	-0.34307	-0.26562	0.152734	-0.218402	0.209337	-0.385144	-0.191766	0.277814	0.0560563	-0.0699188	0.0751952	-0.454956	0.0398222	0.0707036
33	0.046054	0.0534588	-0.114944	-0.0977586	0.177803	-0.0225705	0.119543	-0.0549979	0.0216044	0.0507739	0.099078	-0.159823	-0.253173	0.177141	0.00754082	-0.104618	0.0678507	-0.21625	-0.325393	-0.0941983	0.108236	-0.0392313	-0.41558	-0.37593	-0.0316705	-0.4095	-0.314336	-0.121941	-0.054038	-0.325932	-0.195003	-0.301933	-0.177485	-0.29525	0.132336	-0.101056	-0.0202931	-0.394988	0.205534	-0.321565
33.5	-0.179236	-0.0144251	-0.167132	-0.218847	0.0582703	-0.0613937	0.0586206	-0.0800777	-0.109089	0.459637	-0.046288	-0.178228	-0.139017	-0.100294	-0.146515	-0.30986	-0.252915	-0.112512	-0.268029	-0.0813847	0.0912846	-0.137711	-0.0960983	-0.014653	-0.114806	-0.460286	-0.0903744	-0.132792	-0.0637106	-0.170361	-0.392977	-0.286434	-0.091299	-0.241348	0.393698	-0.306559	-0.170315	-0.327637	0.146206	-0.246026
34	-0.0965321	-0.218519	-0.051896	0.085589	0.0119027	-0.0843314	0.131943	0.223586	-0.0633468	-0.039753	0.0244392	-0.158577	-0.233638	0.332979	-0.264308	-0.407411	-0.203226	-0.25102	-0.145086	-0.1001	-0.0800985	-0.122708	-0.195852	-0.277116	-0.185597	-0.106455	-0.0557453	-0.379513	-0.229274	-0.148798	-0.288629	-0.378149	-0.0329803	-0.270839	-0.0647311	-0.159249	0.27004	-0.388667	0.21014	0.0254233
34.5	-0.152247	0.106261	-0.106545	-0.0158715	0.0142854	-0.109606	-0.200974	-0.0674242	0.0235653	-0.242482	0.142965	-0.11415	-0.241745	0.0151617	0.0366953	-0.358911	-0.516628	-0.225733	-0.202222	0.0505954	-0.0089693	-0.221025	-0.230259	-0.244311	0.075917	-0.521047	-0.31759	-0.363291	-0.0041443	-0.104175	-0.412278	-0.31768	-0.154582	-0.122694	-0.0046665	-0.0967197	0.136734	-0.297716	-0.013429	-0.311095
35	-0.182466	-0.266646	-0.0460568	0.0798461	-0.0382962	-0.0409279	-0.0532442	-0.113742	0.0695536	-0.184119	0.142419	-0.172103	-0.2445	0.06217	-0.153653	-0.415832	-0.247377	-0.160348	-0.269646	-0.127968	-0.133784	0.0623559	-0.242896	-0.204557	-0.146471	-0.492917	-0.160441	-0.304495	-0.011854	-0.347418	-0.444186	-0.222183	-0.123729	-0.1708	-0.0007234	-0.148788	0.0808062	-0.334671	0.215258	-0.321681
35.5	-0.0732046	-0.0161707	-0.147157	-0.113652	-0.0455859	0.0880465	-0.0623067	-0.0989844	-0.152166	-0.0389597	0.124265	-0.162744	-0.39027	0.375419	-0.266779	-0.285276	-0.452401	-0.193154	-0.243679	-0.0122922	0.294905	-0.0394301	-0.473675	-0.306608	-0.101885	-0.301566	-0.237367	-0.284236	0.00771954	-0.149569	-0.324331	-0.441229	-0.0236762	-0.263976	-0.201324	-0.0773834	-0.104831	-0.355243	0.278447	-0.278144
36	-0.125209	0.0278741	-0.17917	-0.0628094	-0.0578289	-0.0725172	-0.0565218	-0.0011638	-0.169621	-0.203435	-0.0372941	-0.315538	-0.156915	-0.0304601	-0.247475	-0.228157	-0.0619856	-0.277919	-0.237862	-0.245645	-0.0207125	-0.10687	-0.391491	-0.231262	-0.0387685	-0.199011	-0.122884	-0.114393	-0.161264	-0.324939	-0.443817	-0.320591	-0.229682	-0.200033	0.0754345	-0.0945984	-0.0682764	-0.429222	-0.012929	-0.373849
36.5	-0.0164039	-0.027747	-0.195186	0.466817	-0.0182949	0.741596	-0.0135318	0.104072	-0.0159977	-0.0619571	-0.230839	-0.288738	-0.011083	0.0378098	-0.235592	-0.243964	0.109156	-0.349867	-0.170589	-0.0976889	-0.0853852	-0.014101	-0.341278	-0.335932	-0.0719007	-0.325647	-0.197971	-0.254531	-0.101173	-0.243976	-0.0877621	-0.212575	0.0118534	-0.102434	-0.251058	-0.257497	-0.192393	-0.281737	0.0335321	-0.0060117
37	0.137414	-0.10869	-0.0764684	-0.219075	-0.0777593	-0.0032991	-0.0226395	0.00464183	-0.144784	-0.378707	-0.152118	0.106613	-0.23734	0.0674737	-0.282992	-0.109729	-0.131982	-0.405283	-0.244332	-0.0969314	-0.0680617	-0.0506829	-0.484289	-0.343436	-0.032883	-0.247726	-0.314333	-0.259163	-0.105321	-0.134617	-0.38069	-0.502763	-0.0989421	-0.264896	-0.065428	-0.268479	-0.1609	-0.289244	-0.121284	-0.246679
37.5	-0.0752517	0.00671901	-0.0639629	-0.0635078	0.0276627	-0.0786294	-0.0032459	0.034278	-0.217059	-0.137395	-0.154152	-0.172334	0.00673366	0.0662641	-0.340346	-0.378529	-0.307026	-0.305832	-0.316189	-0.0503227	-0.152249	-0.0754157	-0.400981	-0.121133	-0.07699	-0.302659	-0.200949	-0.247714	-0.0691611	-0.100586	-0.407903	-0.274402	-0.0210352	-0.505791	0.422821	-0.219337	-0.178477	-0.351895	0.0183127	-0.42412
38	-0.0087065	0.0317122	-0.11208	0.0154409	0.00480413	-0.0581429	-0.0520548	-0.236035	-0.204012	-0.121901	-0.120332	-0.262921	-0.334402	-0.129992	-0.344877	-0.298561	-0.249916	-0.34641	-0.234062	-0.0132327	-0.0121893	0.2463	-0.404531	-0.32999	0.3416	-0.476589	-0.339468	-0.31243	-0.101271	0.0608078	-0.0165696	-0.338359	-0.101488	-0.299406	-0.0729824	-0.393265	-0.108493	-0.281438	0.0177677	-0.453734
38.5	0.155807	0.0439202	0.0492071	-0.144356	-0.0286176	-0.160098	-0.0736272	0.0025307	-0.177928	-0.23906	-0.177758	-0.298835	-0.168777	-0.149365	-0.283855	-0.40021	-0.171497	-0.293261	-0.127842	-0.0447239	0.0675294	-0.0976864	-0.316176	-0.329128	-0.0922942	-0.338132	-0.241359	-0.282383	-0.0067183	-0.262456	-0.3694	-0.195754	-0.0711891	-0.32067	0.19333	-0.310515	-0.229379	-0.520917	-0.121833	-0.362057
39	0.031285	0.0250914	-0.0961581	-0.0637466	0.194778	-0.173423	-0.0507861	-0.0289694	-0.184932	-0.151245	-0.15621	-0.244182	-0.213063	-0.115533	-0.25608	-0.270954	-0.245878	-0.217648	-0.359275	0.0490553	-0.32154	-0.150951	-0.392299	-0.22768	-0.0915397	-0.455854	-0.318342	-0.382234	0.0581688	-0.295918	-0.411666	-0.310266	-0.120038	-0.18981	0.029544	-0.262906	-0.0267429	-0.458488	-0.112895	-0.384414
39.5	-0.0963177	0.0309599	-0.150898	0.0927938	-0.169554	-0.103935	-0.0750848	0.0272297	-0.270166	-0.191252	-0.0437176	-0.345902	-0.26201	-0.158522	-0.253428	-0.358346	-0.208072	-0.424979	-0.212007	-0.140883	-0.179294	-0.160094	-0.325097	-0.380158	-0.0712763	-0.438652	-0.296349	-0.177104	-0.106271	-0.154519	-0.377573	0.412724	0.0839818	-0.227364	-0.0584653	-0.0833475	0.433032	-0.252443	-0.12525	-0.36125

## Sheet: d
Mock	CTNP1	CTNP2	CTNP3	CTNP4
-0.183113	2.90705	6.60668	3.09629	4.30768
0.00423384	4.16205	3.14234	1.76502	1.26484
-0.0965213	2.83103	3.14078	2.84906	1.27538
-0.0399661	2.53401	3.7454	3.35797	2.82618
0.0486192	2.6213	5.9494	2.82627	3.95588
-0.0839335	2.33445	3.33889	2.23434	2.80838
-0.100903	1.59655	1.97114	1.70392	2.44859
-0.0392782	1.67244	2.44387	1.01035	0.958311
Table Analyzed	data2_average5-15min						Number of families	1
Data sets analyzed	A-E						Number of comparisons per family	4
							Alpha	0.05
ANOVA summary
F	14.19						Dunnett's multiple comparisons test	Mean Diff.	95.00% CI of diff.	Below threshold?	Summary	Adjusted P Value	A-?
P value	<0.0001						Mock vs. CTNP1	-2.644	-3.993 to -1.295	Yes	****	<0.0001	B	CTNP1
P value summary	****						Mock vs. CTNP2	-3.854	-5.203 to -2.505	Yes	****	<0.0001	C	CTNP2
Significant diff. among means (P < 0.05)?	Yes						Mock vs. CTNP4	-2.417	-3.766 to -1.068	Yes	***	0.0002	D	CTNP4
R squared	0.6186						Mock vs. CTNP3	-2.542	-3.891 to -1.193	Yes	***	0.0001	E	CTNP3
Brown-Forsythe test							Test details	Mean 1	Mean 2	Mean Diff.	SE of diff.	n1	n2	q	DF
F (DFn, DFd)	2.747 (4, 35)						Mock vs. CTNP1	-0.06136	2.582	-2.644	0.5273	8	8	5.013	35
P value	0.0436						Mock vs. CTNP2	-0.06136	3.792	-3.854	0.5273	8	8	7.308	35
P value summary	*						Mock vs. CTNP4	-0.06136	2.355	-2.417	0.5273	8	8	4.583	35
Are SDs significantly different (P < 0.05)?	Yes						Mock vs. CTNP3	-0.06136	2.481	-2.542	0.5273	8	8	4.82	35
Bartlett's test
Bartlett's statistic (corrected)	34.65
P value	<0.0001
P value summary	****
Are SDs significantly different (P < 0.05)?	Yes
ANOVA table	SS	DF	MS	F (DFn, DFd)	P value
Treatment (between columns)	63.15	4	15.79	F (4, 35) = 14.19	P<0.0001
Residual (within columns)	38.93	35	1.112
Total	102.1	39
Data summary
Number of treatments (columns)	5
Number of values (total)	40

## Sheet: f
Col-0																bak1-5
45	45	51	44	43	62	52	61	38	34	41	53	49	55	63	54	29	31	50	45	49	40	73	52
31	39	64	34	47	52	42	69	35	43	47	59	32	67	43	64	36	39	49	32	45	44	64	36
37	32	67	40	26	51	52	45	20	31	36	58	52	54	43	44	26	25	29	42	44	39	48	48
23	39	74	59	52	46	43	62	38	35	43	64	34	60	32	48	23	33	30	34	24	39	20	36
40	33	115	62	45	79	84	55	29	44	39	105	67	125	46	53	23	30	20	31	28	29	22	44
30	36	139	77	50	100	107	86	37	36	50	141	54	135	70	49	15	11	36	25	39	35	28	41
24	43	162	83	30	124	113	70	34	45	45	169	85	222	93	76	24	31	24	27	29	25	39	41
35	58	192	117	47	168	140	121	36	57	74	219	67	214	104	100	25	44	25	30	18	22	25	29
37	47	182	97	74	150	167	133	29	69	87	214	98	256	134	121	25	24	31	26	24	34	37	35
36	65	177	110	77	181	136	145	33	52	74	198	127	293	155	136	21	26	20	34	30	22	38	32
33	87	204	115	68	166	158	133	31	77	80	224	133	324	165	118	21	20	31	12	16	27	29	35
35	60	185	102	102	207	188	154	46	61	67	206	96	313	189	153	19	20	21	30	33	25	25	38
46	81	180	96	101	191	192	159	38	93	88	175	117	310	182	156	14	23	28	18	38	21	38	38
48	65	172	96	80	186	208	135	31	57	81	187	120	386	191	146	15	22	31	39	31	24	40	31
50	100	133	92	96	163	192	204	39	79	94	158	103	258	193	179	16	18	22	26	29	31	30	34
59	81	125	75	96	157	162	135	38	60	75	145	79	286	159	148	15	29	19	29	19	21	48	38
44	84	114	83	89	155	150	144	29	81	64	171	95	304	188	146	10	18	13	28	24	25	38	24
39	83	75	50	106	120	142	136	35	68	51	104	84	257	162	147	10	16	24	34	23	28	25	31
40	55	71	39	75	132	121	119	27	69	62	102	52	205	132	123	10	20	15	27	6	28	26	22
47	74	51	42	46	92	87	108	32	51	54	82	76	208	135	98	20	20	27	25	22	18	45	31
26	68	47	26	62	82	106	95	29	54	51	67	45	145	120	87	17	12	20	38	22	19	26	18
32	65	41	34	68	66	76	85	28	47	42	58	52	122	112	81	11	12	18	30	29	19	17	33
28	84	40	35	56	57	78	89	31	55	42	57	43	69	108	85	9	22	14	29	17	12	18	21
24	42	28	32	34	51	59	69	26	43	22	46	36	63	91	61	13	9	15	21	15	18	24	22
36	42	26	25	35	48	73	69	17	38	28	37	27	73	104	46	13	11	13	23	13	20	35	37
23	39	25	22	35	50	51	54	19	43	20	34	24	61	83	33	12	9	20	17	23	18	31	22
18	41	26	23	27	35	52	59	15	25	15	31	17	32	65	49	7	12	20	54	15	25	23	26
21	28	17	16	22	26	41	53	14	30	33	45	30	45	49	45	12	15	22	21	14	10	24	33
18	37	15	13	17	21	51	36	20	24	12	32	23	32	51	28	10	10	15	14	15	16	21	21
25	20	19	19	24	26	36	33	14	23	21	24	24	27	67	46	14	9	20	20	21	29	22	32
12	28	23	31	11	25	32	44	13	18	11	28	18	28	41	42	13	8	14	24	17	19	19	27
17	25	9	15	21	27	28	37	22	20	13	28	23	31	57	39	7	15	9	16	24	14	28	27
23	24	12	19	27	30	40	22	19	13	17	22	18	31	32	22	10	23	17	17	9	17	15	14
3	23	13	20	22	20	31	36	14	16	26	22	13	16	43	27	6	13	17	15	14	21	12	17
9	19	7	19	18	13	19	37	6	15	12	17	28	14	42	30	13	11	8	19	25	18	25	16
13	18	17	12	9	17	18	19	23	17	16	18	15	25	25	21	10	11	12	13	15	16	18	15
10	12	10	17	20	15	13	21	16	26	16	22	16	23	22	28	7	15	8	15	12	12	22	14
12	25	11	26	13	22	11	20	10	11	10	15	19	15	28	20	8	10	14	17	14	16	17	9
15	8	14	11	17	13	18	23	7	12	9	30	15	20	27	18	16	14	14	13	8	14	16	10
17	14	15	8	17	3	23	24	11	13	16	15	5	14	27	32	9	9	13	11	16	12	10	15

## Sheet: g
Col-0	bak1-5
1161	614
1869	750
2948	848
1936	1021
1905	909
3229	922
3392	1161
3199	1145
1029
1685
1684
3482
2111
5218
3673
2999
Table Analyzed	Data 2
Column B	bak1-5
vs.	vs.
Column A	Col-0
Unpaired t test
P value	0.0004
P value summary	***
Significantly different (P < 0.05)?	Yes
One- or two-tailed P value?	Two-tailed
t, df	t=4.203, df=22
How big is the difference?
Mean of column A	2595
Mean of column B	921.3
Difference between means (B - A) ± SEM	-1674 ± 398.2
95% confidence interval	-2500 to -848.0
R squared (eta squared)	0.4454
F test to compare variances
F, DFn, Dfd	34.72, 15, 7
P value	<0.0001
P value summary	****
Significantly different (P < 0.05)?	Yes
Data analyzed
Sample size, column A	16
Sample size, column B	8
