# Supplementary material for: Perception of a conserved family of plant signalling peptides by the receptor kinase HSL3
Source: eLife. 2022 May 26;11:e74687. doi: 10.7554/eLife.74687 (PMC9191895; doi:10.7554/eLife.74687)
Supplement: Figure 2—figure supplement 1—source data 1. [file elife-74687-fig2-figsupp1-data1.xlsx]

## Sheet: Sheet1
	flg22-induced expression (Bjornson et al. (2021); time (min))
	5	10	30	90	180
AT1G08590.1	-0.629155	-0.719438	-1.83424	-1.12359	-1.13949
AT1G09970.2	-0.208999	-0.0945161	0.63108	1.98238	1.286
AT1G17230.1	-0.0826038	-0.210343	-0.521924	0.638048	0.948962
AT1G17750.1	0.0964405	-0.0670005	2.31127	1.73178	0.580858
AT1G28440.1	-0.107775	-0.216416	-0.528532	-0.394293	-0.7821
AT1G34110.1	-0.131408	-0.308719	-0.960823	-0.640111	-0.392943
AT1G34420.1	-0.245679	-0.255947	2.86633	2.44354	1.71802
AT1G72180.1	-0.0358546	-0.128631	-0.620639	-2.18097	-2.47625
AT1G73080.1	-0.0700314	0.414503	2.89045	2.83925	1.5193
AT1G75820.1	-0.136877	-0.204819	-0.39078	-0.326912	-0.440711
AT2G31880.1	0.198138	2.03122	4.77924	3.30917	2.47923
AT2G33170.1	-0.113417	0.0753194	-0.171792	-0.0900015	0.0424092
AT2G41820.1	0.0659512	0.0407472	-0.538994	-1.00316	-1.37484
AT3G02130.1	0.116216	0.0184237	1.1733	-0.176185	-0.0852625
AT3G19700.1	-0.204405	0.145729	-0.172847	-0.160803	0.166267
AT3G24240.1	-0.226424	-0.47493	-0.589929	-0.0923145	-0.342802
AT3G49670.1	-0.0636634	-0.233385	-1.00949	-1.65312	-1.93647
AT4G20140.1	-0.553376	-0.282939	-0.250091	0.596562	-0.387046
AT4G20270.1	0.0210041	-0.148438	-0.733929	-0.20674	-0.116651
AT4G26540.1	-0.257601	-0.442116	-0.842948	-1.48938	-1.64785
AT4G28490.1	0.0451589	-0.0392806	0.70664	1.64213	1.17169
AT4G28650.1	-0.456951	-0.344995	-0.902797	-0.311236	-0.418433
AT5G25930.1	-0.0392159	0.430365	3.50945	4.30189	3.64382
AT5G44700.1	-0.805301	-0.164595	-0.319954	0.367329	-0.114791
AT5G48940.1	-0.0879168	-0.334429	-0.726409	-0.110443	-0.131696
AT5G49660.1	-0.0485692	-0.205561	-0.455969	-0.0183734	0.0195496
AT5G56040.2	-0.0620536	-0.127884	-1.35635	-1.23792	-0.985135
AT5G61480.1	0.0109169	-0.128799	-0.430638	-0.319365	-0.325176
AT5G63930.1	-0.292342	-0.512907	-0.296299	0.142565	-0.0411292
AT5G65700.1	-0.110517	-0.176629	-0.350014	-0.857245	-1.20126
AT5G65710.1	-0.0914638	-0.203793	-0.7182	-0.123849	-0.390317
