# Supplementary material for: Perception of a conserved family of plant signalling peptides by the receptor kinase HSL3
Source: eLife. 2022 May 26;11:e74687. doi: 10.7554/eLife.74687 (PMC9191895; doi:10.7554/eLife.74687)
Supplement: Figure 2—source data 1. [file elife-74687-fig2-data1.xlsx]

## Sheet: b
Mock	CTNIP4
0	0
0	5
0	5
1	7
