# Supplementary material for: Perception of a conserved family of plant signalling peptides by the receptor kinase HSL3
Source: eLife. 2022 May 26;11:e74687. doi: 10.7554/eLife.74687 (PMC9191895; doi:10.7554/eLife.74687)
Supplement: Figure 3—figure supplement 2—source data 1. [file elife-74687-fig3-figsupp2-data1.xlsx]

## Sheet: a
mock	CTNIP4	C58S	C68S	C58SC68S	CTNIP5
0.0443	0.0438	0.0548	0.0499	0.0514	0.0506
0.0473	0.0425	0.0572	0.0549	0.043	0.0435
0.0528	0.0541	0.0566	0.0449	0.052	0.057
0.0482	0.0472	0.0462	0.0417	0.0383	0.0569
0.0604	0.0527	0.048	0.0481	0.0456	0.051
0.0424	0.0247	0.0493	0.0506	0.0559	0.0521
0.0452	0.0544	0.0564	0.0527	0.052	0.0483
0.0538	0.0591	0.0685	0.0702	0.0563	0.061

## Sheet: b
mock	CTNIP4	C58S	C68S	C58SC68S	CTNIP5
31.3	3.6	30.1	23.4	26.5	35
23.9	7	25	24.9	25.8	18.3
22.5	2.3	35.5	25.1	18.9	24.5
23.4	3	24.5	22.6	29.2	31.9
26.4	2.6	17.2	23.5	22.6	25.9
27.1	2.6	29.7	22.3	24.1	24.8
21.1	3.1	24.3	30	22.6	22
34.7	1.4	27.1	18.4	30.5	26.3
