# Supplementary material for: Perception of a conserved family of plant signalling peptides by the receptor kinase HSL3
Source: eLife. 2022 May 26;11:e74687. doi: 10.7554/eLife.74687 (PMC9191895; doi:10.7554/eLife.74687)
Supplement: Figure 3—figure supplement 3—source data 1. [file elife-74687-fig3-figsupp3-data1.csv]

	CTNIP4	flg22	elf18	Pep1	nlp20	OGs	mock	CO8	3-OH-FA
CTNIP4	1	0.427313162	0.499751508	0.49605107	0.462859078	0.462713521	0.081948035	0.474099057	0.362563452
flg22	0.427313162	1	0.72080475	0.639325428	0.593170309	0.719295368	0.174239389	0.60209215	0.462058344
elf18	0.499751508	0.72080475	1	0.663894569	0.726257187	0.767434391	0.181638706	0.614651397	0.514992031
Pep1	0.49605107	0.639325428	0.663894569	1	0.579527745	0.645335419	0.094792206	0.523923183	0.484690584
nlp20	0.462859078	0.593170309	0.726257187	0.579527745	1	0.692227387	0.168609561	0.544099506	0.531056771
OGs	0.462713521	0.719295368	0.767434391	0.645335419	0.692227387	1	0.211803013	0.629019398	0.522513027
mock	0.081948035	0.174239389	0.181638706	0.094792206	0.168609561	0.211803013	1	0.298087543	0.181110906
CO8	0.474099057	0.60209215	0.614651397	0.523923183	0.544099506	0.629019398	0.298087543	1	0.49355347
3-OH-FA	0.362563452	0.462058344	0.514992031	0.484690584	0.531056771	0.522513027	0.181110906	0.49355347	1
