# Supplementary material for: Perception of a conserved family of plant signalling peptides by the receptor kinase HSL3
Source: eLife. 2022 May 26;11:e74687. doi: 10.7554/eLife.74687 (PMC9191895; doi:10.7554/eLife.74687)
Supplement: Figure 3—figure supplement 5—source data 1. [file elife-74687-fig3-figsupp5-data1.xlsx]

## Sheet: Sheet1
	Col-0	bak1-5	hsl3-1	hsl3-2	polyproctnip1-4
	198944	12599.8	119366	503991	232101
	86208.9	862089	13262.9	79577.5	318310
	13926.1	132629	27189	139261	59683.1
	19231.2	431045	37136.2	59683.1	205575
	16578.6	258627	72946	18568.1	58356.8
	145892	2.32101e+06	86208.9	62335.7	99471.8
	32494.1	2.85153e+06	185681	305047	86208.9
	55041.1	994718	13926.1	132629	6034.62
Number of values	8	8	8	8	8
							Table Analyzed	Data 1					Number of families	1
Minimum	13926	12600	13263	18568	6035		Data sets analyzed	A-E					Number of comparisons per family	4
25% Percentile	17242	164129	17242	60346	58688								Alpha	0.05
Median	43768	646567	55041	106103	92840		ANOVA summary
75% Percentile	130971	1989437	111077	263600	225470		F	5.326					Dunnett's multiple comparisons test	Mean Diff.	95.00% CI of diff.	Below threshold?	Summary	Adjusted P Value	A-?
Maximum	198944	2851526	185681	503991	318310		P value	0.0019					Col-0 vs. bak1-5	-911991	-1527870 to -296112	Yes	**	0.0021	B	bak1-5
Range	185018	2838926	172418	485423	312275		P value summary	**					Col-0 vs. hsl3-1	1575	-614304 to 617454	No	ns	>0.9999	C	hsl3-1
							Significant diff. among means (P < 0.05)?	Yes					Col-0 vs. hsl3-2	-91597	-707476 to 524282	No	ns	0.9864	D	hsl3-2
95% CI of median							R squared	0.3784					Col-0 vs. polyproctnip1-4	-62178	-678057 to 553701	No	ns	0.9968	E	polyproctnip1-4
Actual confidence level	99.22%	99.22%	99.22%	99.22%	99.22%
Lower confidence limit	13926	12600	13263	18568	6035		Brown-Forsythe test						Test details	Mean 1	Mean 2	Mean Diff.	SE of diff.	n1	n2	q	DF
Upper confidence limit	198944	2851526	185681	503991	318310		F (DFn, DFd)	6.811 (4, 35)					Col-0 vs. bak1-5	71039	983030	-911991	240760	8	8	3.788	35
							P value	0.0004					Col-0 vs. hsl3-1	71039	69465	1575	240760	8	8	0.006542	35
Mean	71039	983030	69465	162636	133218		P value summary	***					Col-0 vs. hsl3-2	71039	162636	-91597	240760	8	8	0.3804	35
Std. Deviation	68500	1054961	60195	163255	106776		Are SDs significantly different (P < 0.05)?	Yes					Col-0 vs. polyproctnip1-4	71039	133218	-62178	240760	8	8	0.2583	35
Std. Error of Mean	24219	372985	21282	57719	37751
							Bartlett's test
							Bartlett's statistic (corrected)	77.25
							P value	<0.0001
							P value summary	****
							Are SDs significantly different (P < 0.05)?	Yes
							ANOVA table	SS	DF	MS	F (DFn, DFd)	P value
							Treatment (between columns)	4939884717285	4	1234971179321	F (4, 35) = 5.326	P=0.0019
							Residual (within columns)	8115177828617	35	231862223675
							Total	13055062545902	39
							Data summary
							Number of treatments (columns)	5
							Number of values (total)	40
