# Supplementary material for: Perception of a conserved family of plant signalling peptides by the receptor kinase HSL3
Source: eLife. 2022 May 26;11:e74687. doi: 10.7554/eLife.74687 (PMC9191895; doi:10.7554/eLife.74687)
Supplement: Figure 3—source data 1. [file elife-74687-fig3-data1.xlsx]

## Sheet: c
CTNIP1		CTNIP2		CTNIP3		CTNIP4
GUS	HSL3	GUS	HSL3	GUS	HSL3	GUS	HSL3
-0.165925	0.89793	0.564624	6.40466	0.00798631	1.02521	0.00206888	5.97925
0.315288	3.56931	0.290732	5.50142	0.595964	1.05908	0.303949	16.3753
0.197926	3.65072	0.176964	6.27228	0.527646	0.676052	0.266156	8.50872
0.214411	3.67327	0.406453	2.34377	0.442185	1.10883	-0.130482	5.30338
0.501954	5.50112	0.366617	6.50436	0.0159503	1.02944	0.542695	6.16257
0.0940652	2.58989	0.464276	6.35302	0.332148	1.45145	0.34698	11.2647
0.0698275	0.206586	0.0859923	4.43647	0.575617	0.763539	0.381943	6.77827
0.0182891	3.39848	0.146383	7.03523	0.773347	2.25114	0.732298	15.2967
CTNIP1			CTNIP2			CTNIP3			CTNIP4
Table Analyzed	average5-15min		Table Analyzed	average5-15min		Table Analyzed	average5-15min		Table Analyzed	average5-15min
Column B	HSL3		Column D	HSL3		Column F	HSL3		Column H	HSL3
vs.	vs.		vs.	vs.		vs.	vs.		vs.	vs.
Column A	GUS		Column C	GUS		Column E	GUS		Column G	GUS
Unpaired t test			Unpaired t test			Unpaired t test			Unpaired t test
P value	0.0004		P value	<0.0001		P value	0.0019		P value	<0.0001
P value summary	***		P value summary	****		P value summary	**		P value summary	****
Significantly different (P < 0.05)?	Yes		Significantly different (P < 0.05)?	Yes		Significantly different (P < 0.05)?	Yes		Significantly different (P < 0.05)?	Yes
One- or two-tailed P value?	Two-tailed		One- or two-tailed P value?	Two-tailed		One- or two-tailed P value?	Two-tailed		One- or two-tailed P value?	Two-tailed
t, df	t=4.623, df=14		t, df	t=9.692, df=14		t, df	t=3.804, df=14		t, df	t=5.916, df=14
How big is the difference?			How big is the difference?			How big is the difference?			How big is the difference?
Mean of column A	0.1557		Mean of column C	0.3128		Mean of column E	0.4089		Mean of column G	0.3057
Mean of column B	2.936		Mean of column D	5.606		Mean of column F	1.171		Mean of column H	9.459
Difference between means (B - A) ± SEM	2.780 ± 0.6014		Difference between means (D - C) ± SEM	5.294 ± 0.5462		Difference between means (F - E) ± SEM	0.7617 ± 0.2003		Difference between means (H - G) ± SEM	9.153 ± 1.547
95% confidence interval	1.490 to 4.070		95% confidence interval	4.122 to 6.465		95% confidence interval	0.3322 to 1.191		95% confidence interval	5.835 to 12.47
R squared (eta squared)	0.6042		R squared (eta squared)	0.8703		R squared (eta squared)	0.5082		R squared (eta squared)	0.7143
F test to compare variances			F test to compare variances			F test to compare variances			F test to compare variances
F, DFn, Dfd	70.30, 7, 7		F, DFn, Dfd	84.19, 7, 7		F, DFn, Dfd	3.223, 7, 7		F, DFn, Dfd	252.1, 7, 7
P value	<0.0001		P value	<0.0001		P value	0.1454		P value	<0.0001
P value summary	****		P value summary	****		P value summary	ns		P value summary	****
Significantly different (P < 0.05)?	Yes		Significantly different (P < 0.05)?	Yes		Significantly different (P < 0.05)?	No		Significantly different (P < 0.05)?	Yes
Data analyzed			Data analyzed			Data analyzed			Data analyzed
Sample size, column A	8		Sample size, column C	8		Sample size, column E	8		Sample size, column G	8
Sample size, column B	8		Sample size, column D	8		Sample size, column F	8		Sample size, column H	8

## Sheet: d
Col-0	35S::HSL3-GFP
84.7634	7.40118
98.9313	10.4289
93.0687	10.7653
74.0153	5.04626
103.573	15.4752
94.5344	13.4567
111.389	10.0925
107.237	11.1018
Table Analyzed	210510_Col-0_relative
Column B	35S::HSL3-GFP
vs.	vs.
Column A	Col-0
Unpaired t test
P value	<0.0001
P value summary	****
Significantly different (P < 0.05)?	Yes
One- or two-tailed P value?	Two-tailed
t, df	t=19.09, df=14
How big is the difference?
Mean of column A	95.94
Mean of column B	10.47
Difference between means (B - A) ± SEM	-85.47 ± 4.478
95% confidence interval	-95.07 to -75.86
R squared (eta squared)	0.963
F test to compare variances
F, DFn, Dfd	14.29, 7, 7
P value	0.0023
P value summary	**
Significantly different (P < 0.05)?	Yes
Data analyzed
Sample size, column A	8
Sample size, column B	8

## Sheet: h
Col-0	hsl3-1	hsl3-2	ctnip1-4
-32.1337	-0.443667	-8.325	-34.3303
-13.4967	5.73333	2.814	-8.52126
-27.8117	-3.88167	1.822	-5.15526
-38.0777	0.322333	4.051	-24.5503
-27.3657	-6.58867	-12.571	-3.70026
-21.1287	-12.4997	-4.724	-11.7453
-20.7357	-4.26267	2.093	-7.12526
-18.8927	-4.93167	2.119	8.20274
-22.6167	-11.3067	1.332	-10.2363
-8.70275	0.913333	5.344	-19.3093
-14.9707	10.0763	6.372	-25.6763
-10.4797	6.69033	-0.869	-17.8343
Table Analyzed	relative_length_JRP4					Number of families	1
Data sets analyzed	A-D					Number of comparisons per family	3
						Alpha	0.05
ANOVA summary
F	16.67					Dunnett's multiple comparisons test	Mean Diff.	95.00% CI of diff.	Below threshold?	Summary	Adjusted P Value	A-?
P value	<0.0001					Col-0 vs. hsl3-1	-19.69	-28.19 to -11.18	Yes	****	<0.0001	B	hsl3-1
P value summary	****					Col-0 vs. hsl3-2	-21.32	-29.83 to -12.82	Yes	****	<0.0001	C	hsl3-2
Significant diff. among means (P < 0.05)?	Yes					Col-0 vs. polyproCTNIP	-8.036	-16.54 to 0.4664	No	ns	0.0677	D	polyproCTNIP
R squared	0.532
						Test details	Mean 1	Mean 2	Mean Diff.	SE of diff.	n1	n2	q	DF
Brown-Forsythe test						Col-0 vs. hsl3-1	-21.37	-1.682	-19.69	3.495	12	12	5.633	44
F (DFn, DFd)	1.872 (3, 44)					Col-0 vs. hsl3-2	-21.37	-0.04517	-21.32	3.495	12	12	6.101	44
P value	0.1482					Col-0 vs. polyproCTNIP	-21.37	-13.33	-8.036	3.495	12	12	2.3	44
P value summary	ns
Are SDs significantly different (P < 0.05)?	No
Bartlett's test
Bartlett's statistic (corrected)	5.918
P value	0.1157
P value summary	ns
Are SDs significantly different (P < 0.05)?	No
ANOVA table	SS	DF	MS	F (DFn, DFd)	P value
Treatment (between columns)	3665	3	1222	F (3, 44) = 16.67	P<0.0001
Residual (within columns)	3224	44	73.28
Total	6889	47
Data summary
Number of treatments (columns)	4
Number of values (total)	48

## Sheet: i
Col-0	hsl3-1	hsl3-2	ctnip1-4
80.7854	96.079	98.8406	82.8574
93.8663	94.728	100.44	55.1512
81.8185	114.564	117.263	65.1765
83.6514	106.315	108.41	73.8683
98.7986	114.287	107.043	65.7549
76.7765	105.276	109.896	49.2027
86.8889	107.473	106.212	72.7317
73.7726	107.943	97.5076	44.0455
67.8495	99.1493	107.039	74.9528
73.578	112.311	118.198	85.3878
89.7902	81.3238	91.1267	81.9175
87.9822	119.252	115.013	75.1336
Table Analyzed	relative_length_JRP4					Number of families	1
Data sets analyzed	A-D					Number of comparisons per family	3
						Alpha	0.05
ANOVA summary
F	35.72					Dunnett's multiple comparisons test	Mean Diff.	95.00% CI of diff.	Below threshold?	Summary	Adjusted P Value	A-?
P value	<0.0001					Col-0 vs. hsl3-1	-21.93	-32.36 to -11.49	Yes	****	<0.0001	B	hsl3-1
P value summary	****					Col-0 vs. hsl3-2	-23.45	-33.89 to -13.02	Yes	****	<0.0001	C	hsl3-2
Significant diff. among means (P < 0.05)?	Yes					Col-0 vs. polyproCTNIP	14.11	3.680 to 24.55	Yes	**	0.0055	D	polyproCTNIP
R squared	0.7089
						Test details	Mean 1	Mean 2	Mean Diff.	SE of diff.	n1	n2	q	DF
Brown-Forsythe test						Col-0 vs. hsl3-1	82.96	104.9	-21.93	4.289	12	12	5.113	44
F (DFn, DFd)	0.7103 (3, 44)					Col-0 vs. hsl3-2	82.96	106.4	-23.45	4.289	12	12	5.468	44
P value	0.551					Col-0 vs. polyproCTNIP	82.96	68.85	14.11	4.289	12	12	3.291	44
P value summary	ns
Are SDs significantly different (P < 0.05)?	No
Bartlett's test
Bartlett's statistic (corrected)	2.926
P value	0.4032
P value summary	ns
Are SDs significantly different (P < 0.05)?	No
ANOVA table	SS	DF	MS	F (DFn, DFd)	P value
Treatment (between columns)	11829	3	3943	F (3, 44) = 35.72	P<0.0001
Residual (within columns)	4856	44	110.4
Total	16685	47
Data summary
Number of treatments (columns)	4
Number of values (total)	48

## Sheet: j
Col-0	35S::CTNIP4-GFP	35S::CTNIP4#3
75.53	32.308	76.253
66.315	66.098	63.756
74.408	66.179	70.408
76.253	58.149	49.365
74.539	55.973	65.052
80.861	79.729	65.406
84.42	75.748	55.58
79.986	61.674	64.434
62.673	64.71	65.48
83.646	67.098	51.551
66.057	59.239	60.809
70.382	67.015	70.196
76.328	51.15	71.249
78.984	82.87	65.217
80.069	48.811	67.777
80.94	36.652	69.477
73.579	73.486	75.091
66.974	51.179	68.864
79.749	65.783	70.664
82.827	63.733	73.868
63.261	75.088	65.351
77.628	57.628
72.343	51.921
71.453
Table Analyzed	angle					Number of families	1
Data sets analyzed	A, B, D					Number of comparisons per family	2
						Alpha	0.05
ANOVA summary
F	13.5					Dunnett's multiple comparisons test	Mean Diff.	95.00% CI of diff.	Below threshold?	Summary	Adjusted P Value	A-?
P value	<0.0001					Col-0 vs. 35S::CTNIP4-GFP	13.57	7.548 to 19.58	Yes	****	<0.0001	B	35S::CTNIP4-GFP
P value summary	****					Col-0 vs. 35S::CTNIP4#3	8.974	2.812 to 15.14	Yes	**	0.0031	D	35S::CTNIP4#3
Significant diff. among means (P < 0.05)?	Yes
R squared	0.2935					Test details	Mean 1	Mean 2	Mean Diff.	SE of diff.	n1	n2	q	DF
						Col-0 vs. 35S::CTNIP4-GFP	74.97	61.4	13.57	2.658	24	23	5.104	65
Brown-Forsythe test						Col-0 vs. 35S::CTNIP4#3	74.97	65.99	8.974	2.722	24	21	3.297	65
F (DFn, DFd)	4.192 (2, 65)
P value	0.0194
P value summary	*
Are SDs significantly different (P < 0.05)?	Yes
Bartlett's test
Bartlett's statistic (corrected)	12.15
P value	0.0023
P value summary	**
Are SDs significantly different (P < 0.05)?	Yes
ANOVA table	SS	DF	MS	F (DFn, DFd)	P value
Treatment (between columns)	2241	2	1120	F (2, 65) = 13.50	P<0.0001
Residual (within columns)	5394	65	82.98
Total	7635	67
Data summary
Number of treatments (columns)	3
Number of values (total)	68

## Sheet: k
Col-0	35S::CTNIP4-GFP	35S::CTNIP4#3
24.507	14.008	13.813
25.581	18.101	19.1
26.708	27.064	22.673
24.343	22.642	18.473
24.635	12.671	26.426
25.044	16.84	20.391
23.171	12.708	24.688
23.599	12.161	25.551
24.328	17.857	25.084
28.034	17.947	27.371
24.949	21.339	21.459
23.986	20.715	19.537
26.827	18.984	25.784
26.688	13.487	24.88
23.152	27.067	18.195
22.97	17.251	23.814
21.62	16.868	19.933
26.014	19.375	18.236
24.889	16.886	22.37
25.043	15.657
19.181
Table Analyzed	length					Number of families	1
Data sets analyzed	A, B, D					Number of comparisons per family	2
						Alpha	0.05
ANOVA summary
F	19.43					Dunnett's multiple comparisons test	Mean Diff.	95.00% CI of diff.	Below threshold?	Summary	Adjusted P Value	A-?
P value	<0.0001					Col-0 vs. 35S::CTNIP4-GFP	6.555	4.153 to 8.957	Yes	****	<0.0001	B	35S::CTNIP4-GFP
P value summary	****					Col-0 vs. 35S::CTNIP4#3	2.548	0.1139 to 4.983	Yes	*	0.0389	D	35S::CTNIP4#3
Significant diff. among means (P < 0.05)?	Yes
R squared	0.4054					Test details	Mean 1	Mean 2	Mean Diff.	SE of diff.	n1	n2	q	DF
						Col-0 vs. 35S::CTNIP4-GFP	24.54	17.98	6.555	1.058	21	20	6.196	57
Brown-Forsythe test						Col-0 vs. 35S::CTNIP4#3	24.54	21.99	2.548	1.072	21	19	2.377	57
F (DFn, DFd)	4.417 (2, 57)
P value	0.0165
P value summary	*
Are SDs significantly different (P < 0.05)?	Yes
Bartlett's test
Bartlett's statistic (corrected)	11
P value	0.0041
P value summary	**
Are SDs significantly different (P < 0.05)?	Yes
ANOVA table	SS	DF	MS	F (DFn, DFd)	P value
Treatment (between columns)	445.7	2	222.8	F (2, 57) = 19.43	P<0.0001
Residual (within columns)	653.7	57	11.47
Total	1099	59
Data summary
Number of treatments (columns)	3
Number of values (total)	60
