# Supplementary material for: Perception of a conserved family of plant signalling peptides by the receptor kinase HSL3
Source: eLife. 2022 May 26;11:e74687. doi: 10.7554/eLife.74687 (PMC9191895; doi:10.7554/eLife.74687)
Supplement: Figure 4—source data 1. [file elife-74687-fig4-data1.xlsx]

## Sheet: g
	Mock																								AtCTNIP4																								MtCTNIP
	mock								AtCTNIP4								MtCTNIP								mock								CTNIP4								MtCTNIP								mock
-5	0.128431	0.182178	0.976236	0.286449	1.28167	0.908839	0.643294	0.718995	0.476171	0.448542	-0.0871299	-0.453266	0.143842	0.196868	0.171329	0.792228	0.030478	0.0593321	-0.243832	-0.424189	-0.298999	-0.265099	-0.466692	0.110112	0.0778495	0.557921	-0.130591	0.193866	0.36676	0.483867	0.460013	0.586126	0.0999078	0.0480771	-0.0954395	-0.186266	0.108453	-0.0758329	0.314639	-0.295261	-0.316045	0.00438798	-0.0004773	0.0230043	-0.133966	0.591528	-0.049858	-0.171119	0.575363
-4.5	-0.251264	-0.245339	0.0193137	0.320298	-0.190144	0.0274808	0.120258	-0.0218343	0.323444	0.481614	-0.363301	-0.0329477	-0.302718	0.0758352	0.00268063	-0.217484	-0.19962	0.348623	-0.451409	0.00032654	0.22735	0.152258	-0.245764	-0.0506557	-0.20067	0.651305	0.0303352	-0.0338445	-0.393843	0.0356992	0.34762	0.579011	-0.0568903	-0.0723135	-0.168932	0.246169	-0.252987	0.130348	-0.33343	-0.314405	-0.144926	-0.438357	-0.51005	0.275248	0.194928	-0.0638362	-0.314665	0.00067973	-0.157297
-4	-0.0662059	-0.149311	0.015298	-0.265933	-0.19145	-0.529362	-0.131694	-0.106896	-0.295252	-0.377674	-0.500595	-0.0968037	-0.0661389	-0.18867	0.382797	-0.183842	-0.0699632	0.39066	1.54103	0.175773	-0.212258	-0.099346	0.0908751	0.0578	-0.0816502	0.469135	-0.0624294	-0.256814	-0.3829	0.0882146	0.0180225	0.209147	-0.273541	-0.111264	-0.210735	-0.0187309	-0.0110972	0.00010448	0.300152	-0.0852543	-0.331288	0.144222	-0.407907	-0.215834	0.160719	-0.151043	0.247231	-0.0122144	-0.122606
-3.5	-0.300171	0.0428373	-0.184958	-0.204202	-0.0755545	-0.37772	-0.019553	-0.15542	-0.326236	-0.220898	-0.457867	0.0247104	0.173983	-0.369312	-0.172163	-0.201979	-0.499212	-0.114056	-0.181813	-0.243133	-0.0263211	0.113488	-0.296351	0.152818	0.497137	0.166343	-0.161266	0.0734046	-0.13762	-0.0333922	-0.0087026	0.0260324	-0.189308	0.0949634	-0.184009	0.0119878	-0.693234	0.101224	-0.291384	-0.244637	0.661887	0.0443876	0.334126	-0.01038	-0.0028551	-0.0472569	-0.116377	0.118589	0.0071794
-3	-0.0843129	-0.0305311	-0.234816	-0.123862	-0.173835	0.243181	-0.317273	0.0749843	0.314725	0.0282356	0.0963613	-0.534755	0.401079	-0.208283	-0.0951271	-0.253937	-0.187709	-0.340618	-0.295184	0.530091	-0.095428	-0.3532	1.70316	-0.0571311	-0.0786324	-0.247009	-0.231197	-0.270326	-0.416339	-0.25936	-0.143234	-0.327627	-0.345494	-0.12142	0.16261	-0.228926	0.0771059	0.103629	0.234103	-0.081738	-0.111887	0.273385	-0.117264	0.132094	-0.0568889	-0.0695376	-0.0044027	-0.0810562	-0.262889
-2.5	-0.0861761	7.3113e-05	-0.248146	0.343622	-0.0149622	-0.148013	-0.224506	-0.342049	-0.423688	0.577631	-0.198359	-0.287526	-0.470144	-0.310111	0.020753	0.211428	-0.324964	-0.218201	0.0357693	0.0461946	0.0991968	0.219632	-0.139273	-0.0293181	-0.398273	-0.003414	0.249135	0.174026	0.217043	-0.159617	-0.0933303	-0.171157	-0.112231	-0.225131	0.631447	0.305829	0.225003	0.0555039	-0.118541	0.0491501	0.443841	-0.336615	-0.0373462	-0.318999	-0.345427	0.149533	0.124816	-0.0990505	0.0660916
-2	0.362132	-0.142481	-0.147378	-0.274191	-0.389439	-0.162135	-0.186974	-0.0930324	0.254569	-0.190914	0.00209113	-0.0567501	0.254562	0.197281	-0.223235	0.257399	0.270062	0.0173821	-0.0460265	0.247542	-0.206155	0.144068	-0.10212	0.349089	0.271633	-0.438727	-0.285532	0.013672	0.158454	-0.168073	-0.117029	0.0442875	0.642378	0.253771	0.126882	0.155826	-0.246103	0.230381	-0.435372	-0.0156854	0.208351	0.371534	-0.106071	-0.310836	-0.0549009	-0.45119	0.240395	0.113802	-0.0132454
-1.5	-0.0546539	-0.152634	-0.112074	0.159282	-0.246075	-0.119814	0.33524	0.103777	0.0692206	0.0175339	1.54392	1.40558	0.267963	0.318567	0.232992	-0.293521	0.98688	-0.0819165	-0.294981	-0.102767	0.147585	-0.0991906	0.134055	-0.20577	-0.171166	-0.39858	-0.150254	-0.18831	0.328741	-0.177799	-0.249395	-0.194353	-0.0305166	-0.158239	0.20645	-0.221052	0.402747	-0.151114	-0.300862	0.0846094	-0.244375	0.0416385	0.0735181	0.0433562	0.112652	-0.132751	-0.0878859	-0.116387	-0.251362
-1	0.158968	0.00314052	0.134716	0.0523996	-0.253584	0.224067	0.0269492	-0.174871	-0.584242	-0.514376	0.157965	0.146875	-0.243006	0.550764	-0.235912	-0.0218463	0.164676	0.0045824	0.0219669	0.0769756	0.0680711	0.402386	-0.678896	-0.16063	0.242336	-0.427572	0.614834	0.0025142	0.13213	-0.0275251	-0.0820605	-0.483681	0.0652493	0.607447	-0.370641	-0.0406153	0.160938	-0.612977	0.601581	-0.219592	-0.211632	-0.0776264	0.00560777	0.145784	0.058769	0.276257	0.031793	-0.150058	0.0427938
-0.5	0.193253	0.492067	-0.21819	-0.293863	0.253371	-0.0665225	-0.245741	-0.0036541	0.191288	-0.249695	-0.193085	-0.115113	-0.159421	-0.262938	-0.0841148	-0.0884467	-0.170627	-0.0657892	-0.085518	-0.306813	0.296958	-0.214998	0.0010085	-0.166314	-0.158564	-0.329403	0.126965	0.291811	0.127572	0.217987	-0.131903	-0.267785	0.200446	-0.315892	-0.0976338	-0.0242214	0.229174	0.218734	0.029113	1.12281	0.0460747	-0.0269571	0.765863	0.236561	0.066969	-0.101704	-0.0710462	0.396813	0.115972
0
0.5
1	0.155421	0.172633	2.04807	0.187262	-0.000585	0.548417	0.0788274	0.14444	0.0999444	-0.319882	-0.240551	-0.0752034	-0.379471	-0.0500063	0.159393	0.11698	0.489623	0.661479	-0.0935127	-0.0669957	-0.141354	-0.235208	-0.154975	0.0607958	0.46624	0.359292	0.543447	0.417796	-0.101955	0.446725	0.204992	-0.0084737	0.236213	-0.0799158	0.355451	-0.448195	0.076921	-0.357524	-0.402747	-0.125421	-0.088287	-0.159542	0.680687	-0.104301	0.00241199	-0.279888	-0.137412	0.0338576	0.291132
1.5	-0.045672	0.0180454	0.534535	-0.139213	0.107026	-0.203715	0.11779	-0.199327	0.0224517	-0.141231	-0.533971	-0.273874	-0.230735	-0.394987	0.0704609	-0.139596	0.673308	-0.0434152	-0.113518	-0.110094	0.308059	-0.182741	-0.510495	0.00295047	0.0662886	-0.0136574	0.20072	0.0993186	0.0639803	0.469216	0.0457551	-0.102006	-0.368478	-0.100333	0.329237	-0.149837	-0.152525	-0.293013	0.227698	-0.204353	-0.422694	-0.574112	-0.0710408	-0.603266	-0.211519	-0.186268	0.211059	-0.0212206	-0.287062
2	-0.137468	-0.0759899	0.084342	-0.488734	-0.554866	-0.0609346	-0.133042	-0.148763	-0.116358	0.42271	-0.416364	-0.380032	-0.276983	-0.379547	1.05028	0.421787	0.0506156	-0.176091	-0.315212	-0.3414	-0.259985	-0.0293332	-0.317178	0.0129618	-0.0940295	0.262716	0.0771604	0.146063	0.039801	-0.241354	0.2274	-0.189689	0.0215411	0.254596	-0.0503432	-0.0041181	-0.383062	-0.410352	-0.140203	0.0373652	-0.250485	-0.401478	0.369332	-0.300531	0.309844	-0.373137	-0.150639	-0.227805	-0.15394
2.5	-0.264693	-0.364256	0.231054	-0.0074334	-0.183484	-0.223128	-0.217369	-0.357261	-0.397593	1.37434	-0.127769	-0.142883	0.464655	0.0155906	-0.0410418	-0.495916	-0.0971214	0.24243	-0.138968	-0.204917	-0.423313	0.268821	-0.299148	-0.350016	-0.342614	-0.125391	-0.447142	-0.191234	-0.156187	0.0141054	-0.0465888	0.437618	-0.0154701	0.61409	0.0564277	-0.312273	-0.349479	-0.160509	-0.381642	0.193117	-0.23397	-0.279908	0.13485	0.4409	0.149704	0.575061	-0.152538	-0.205216	-0.240296
3	-0.342444	-0.110339	0.463983	-0.369764	-0.219858	-0.516745	-0.199063	-0.304169	-0.0168497	-0.32914	-0.0894267	-0.250843	0.146864	-0.189283	-0.163331	-0.390915	-0.139019	-0.0455645	-0.149524	0.046278	-0.144583	0.416401	-0.344562	-0.39391	-0.26046	-0.111425	-0.168247	-0.237067	-0.332196	-0.0840789	0.918159	-0.192712	-0.399981	0.107214	0.181311	-0.173947	-0.0721542	-0.420397	0.166	0.0632729	-0.215553	-0.40708	-0.289626	0.00798111	-0.0090293	-0.221543	-0.639193	-0.483294	-0.422619
3.5	-0.0783784	-0.0016419	0.434305	-0.0244163	0.207713	-0.151683	-0.298149	-0.33427	-0.0427217	0.0502713	-0.496651	-0.367129	0.269059	-0.282987	0.112752	-0.344976	2.84748	0.0341868	-0.467062	0.295085	-0.113908	-0.620872	-0.130297	-0.517042	0.0280263	-0.260381	0.222364	0.0427912	-0.2468	0.60504	1.12268	0.367299	1.31918	0.852997	-0.370433	0.0109855	-0.32641	0.0621946	0.300152	0.0857746	-0.414479	-0.442767	0.0116285	0.99813	0.159437	-0.0373758	-0.526524	-0.346821	-0.156584
4	-0.409644	0.017247	0.425471	0.0118683	-0.209841	0.148835	-0.109941	-0.21869	-0.146898	-0.308682	-0.370884	-0.466734	-0.0343933	0.0581607	-0.378475	-0.374932	-0.207117	-0.254698	-0.141575	-0.512023	0.178665	0.0251331	-0.340131	-0.267116	0.32825	-0.173468	0.591833	-0.241631	-0.201127	0.350154	0.701157	0.00349435	1.6819	3.77662	0.72445	0.35706	1.93934	0.758412	1.23227	-0.022881	-0.515133	0.0378539	-0.198799	0.22479	0.0606322	0.10874	-0.0333265	-0.326615	0.0812082
4.5	-0.0629632	-0.207514	-0.378063	0.0823686	0.136632	-0.357282	-0.219738	-0.158728	-0.048595	-0.470743	0.449551	-0.420775	-0.383312	0.173241	-0.423333	0.0923152	-0.0502334	-0.118929	-0.291646	-0.401133	-0.196216	0.253492	-0.453934	0.199363	0.138749	0.321433	0.300043	0.1448	-0.0918376	0.180881	1.44616	0.125083	6.31787	5.80418	2.63705	0.625184	2.22479	1.11719	2.12094	0.178401	-0.584546	-0.339964	-0.21439	0.139841	-0.205739	-0.161139	0.214232	-0.211943	-0.240183
5	-0.263999	-0.0007246	-0.356559	-0.0776818	0.189882	0.484333	-0.0259125	0.0225411	-0.193881	-0.497191	-0.289306	-0.221332	-0.249255	-0.339083	-0.41946	0.034734	-0.0792061	-0.213484	-0.534767	0.0912654	0.0496899	-0.328451	-0.0155759	0.259041	0.00850992	-0.144715	-0.0056913	-0.145029	-0.353946	0.926824	0.798881	-0.278925	7.33633	8.97522	4.41251	0.729966	4.27917	1.1042	3.34134	1.70489	-0.2838	-0.507865	0.116291	1.09838	-0.171478	-0.22598	-0.625653	-0.265874	-0.187847
5.5	0.141489	-0.0967629	0.0648458	-0.16879	-0.215829	2.2469	0.0539147	-0.115052	-0.305073	-0.249976	-0.374021	0.208241	-0.197094	-0.0894958	-0.365383	-0.0743954	-0.138516	-0.081422	-0.0784916	0.226238	-0.305041	-0.233728	-0.543934	-0.0208052	0.25712	0.331413	0.0454821	0.11306	-0.300524	1.15485	0.467956	-0.146935	12.8218	14.8904	7.0193	1.67777	8.06561	2.20512	5.24787	0.294197	-0.0830994	-0.153437	-0.153481	0.957742	0.17474	-0.198149	-0.423884	-0.313969	-0.37336
6	0.186926	0.601858	-0.0788469	-0.117767	-0.0035467	1.46833	0.0813083	-0.167147	-0.0370293	-0.688271	-0.383872	-0.125045	0.0261629	0.0166437	0.221881	0.317419	-0.188224	-0.0245108	-0.101334	0.180755	0.274276	-0.0715247	-0.302174	-0.260534	0.0546765	-0.0537081	0.292701	0.046114	-0.169559	1.41756	1.14722	0.147823	12.2398	20.2483	9.65527	2.04665	10.3992	3.756	9.13579	0.504622	-0.215529	-0.491704	0.246144	0.485687	-0.212206	-0.345677	-0.432924	-0.0784494	-0.366677
6.5	-0.24787	0.196459	0.334609	0.0846893	0.0392618	0.587854	0.112509	-0.39996	0.0796743	-0.400382	-0.281768	1.1829	-0.0637175	-0.054516	-0.103577	-0.155896	-0.414212	0.0596177	-0.24028	-0.197162	-0.103085	-0.59005	-0.273531	-0.308994	0.289757	-0.193215	0.305834	-0.17705	-0.316112	1.76806	12.9739	0.107875	17.7139	20.8038	15.1083	2.05546	11.0425	3.9689	12.0952	0.600711	-0.21432	0.0201508	-0.244804	0.089128	0.254676	-0.160169	-0.391753	-0.238195	-0.0632792
7	0.513329	0.0190801	0.201606	-0.0459996	-0.198687	-0.135066	-0.21664	-0.04001	-0.19165	-0.477611	-0.372138	0.148065	-0.299139	-0.283138	-0.240979	0.229426	-0.497385	-0.19324	0.038384	0.216976	0.0597644	-0.231858	-0.212048	-0.209642	0.33375	0.124845	0.390736	-0.279691	-0.424458	2.49349	4.1521	0.490968	18.4597	21.3699	16.2005	4.04406	14.1364	5.33498	11.7636	0.542406	-0.081262	-0.295006	0.233072	-0.469179	0.936299	-0.0780609	-0.284328	0.259285	-0.107571
7.5	-0.252319	0.0953986	-0.0118266	-0.235644	0.693496	0.126541	-0.131586	-0.530706	-0.218758	-0.0437909	-0.227229	0.246642	0.163241	-0.283852	-0.154778	0.0920005	0.296143	-0.136329	0.0861626	0.0896794	0.271466	0.0576963	-0.311422	-0.0270393	0.190339	-0.242535	0.0780887	-0.120546	-0.386683	0.867008	2.48675	-0.173973	19.5319	26.3874	15.4576	3.91193	14.3102	4.57364	14.1802	1.0794	-0.429116	0.0442979	0.226555	0.089153	-0.108013	0.277835	0.154087	-0.188567	-0.156187
8	-0.242951	0.344106	0.371649	-0.476022	0.0334296	0.128419	-0.0398335	-0.152697	0.335251	0.804448	-0.291917	0.276871	0.0993914	-0.324354	0.0854054	0.0122942	-0.0210912	-0.18125	0.380597	0.0227211	0.561228	-0.550916	-0.234042	0.108862	0.316945	-0.435742	-0.037131	-0.328003	-0.0221956	0.702471	1.75891	-0.131436	16.7617	21.356	15.6372	4.60965	12.1466	4.86238	13.857	1.83186	-0.160404	-0.304642	-0.386475	-0.122456	-0.466299	0.202315	-0.195634	-0.467666	-0.24394
8.5	-0.371171	-0.0672504	0.702294	-0.0193278	-0.0079082	0.0130216	-0.0705112	-0.226089	0.0756702	-0.428731	-0.551323	0.0813628	0.296889	-0.0244219	-0.114649	-0.135435	-0.0096969	-0.137638	0.208821	-0.297204	-0.262556	-0.0712667	-0.20118	-0.300813	-0.0842841	-0.0496429	-0.428623	-0.0901159	-0.221992	0.388966	0.65215	0.142506	16.0088	20.1535	14.7743	4.40673	12.6331	6.30053	14.4305	0.699536	-0.479961	-0.244894	-0.228645	-0.194027	-0.178335	-0.243086	-0.253856	-0.482337	-0.413197
9	0.0430465	-0.282694	-0.148942	-0.174366	0.523599	-0.0992122	-0.213562	-0.299235	0.163734	0.0790072	0.0996422	-0.0920918	-0.136572	0.0473395	-0.18329	-0.0394306	0.0741432	0.00236902	-0.0010561	-0.142042	0.272214	-0.343525	-0.184918	-0.116891	0.0481548	0.635745	-0.343746	0.305841	-0.410457	0.160655	0.801871	1.06171	13.5059	22.341	14.5411	6.3681	12.5062	5.86031	14.8453	1.37869	-0.229992	-0.359041	-0.0551105	0.130064	0.239283	-0.0300722	-0.185317	-0.038807	0.0305528
9.5	-0.0577997	-0.295355	0.425445	-0.459293	-0.0045697	-0.298697	-0.143809	-0.22079	-0.0001041	0.111124	0.190277	-0.0135631	-0.214086	0.264576	0.0103496	0.164894	0.215861	0.169345	-0.425997	-0.105064	-0.302231	-0.10589	-0.250814	-0.153857	0.0221679	-0.0264102	-0.538264	-0.326949	-0.177143	1.54614	0.430806	0.946561	13.1205	20.5448	13.4544	4.34952	11.0801	8.04925	13.5215	1.41281	-0.431535	-0.193297	-0.271521	-0.242789	-0.177825	-0.293919	0.0698659	-0.627837	0.242667
10	-0.510509	-0.34905	0.0299865	-0.125877	0.197896	-0.30313	-0.148343	-0.122695	-0.1094	-0.0016372	-0.557405	0.0493357	-0.660155	0.221107	0.0521412	-0.0948574	-0.140069	-0.0107626	0.0613044	-0.0674499	-0.125629	-0.0950047	0.640329	-0.0862998	-0.262787	0.253027	-0.222711	-0.18557	-0.271053	0.40833	0.433224	0.488594	11.8999	19.9865	13.7857	4.80351	8.00612	6.89445	13.109	0.956909	-0.397229	-0.0794279	-0.240916	-0.165192	0.00378832	-0.167704	-0.543286	-0.184626	0.948576
10.5	-0.249297	0.00552073	0.413665	-0.22964	-0.0551694	-0.246272	0.0540641	-0.335515	-0.351755	-0.55896	-0.147404	-0.240637	-0.0232456	-0.0754813	-0.118831	-0.0631386	0.0886176	0.0692654	0.398926	0.229906	0.278281	-0.0004074	-0.200263	-0.14556	3.78983	0.284522	-0.0602027	-0.152916	-0.262795	0.559307	0.425815	0.308398	10.8366	17.7995	13.0962	5.07258	10.8848	6.38155	13.6123	0.760074	-0.296727	-0.369992	0.0484456	0.0189838	-0.178365	-0.351016	-0.393149	-0.0404248	0.507419
11	-0.292238	-0.295491	0.0838338	-0.114218	-0.312219	-0.125677	0.149904	-0.199695	-0.121418	-0.256354	-0.306957	0.0186184	-0.0490044	-0.338669	-0.19068	-0.43357	0.0849398	-0.0570518	-0.270506	0.238637	0.182822	-0.475774	-0.479807	-0.252121	-0.0868677	-0.320419	0.175646	0.110039	-0.278969	0.475619	0.451786	0.192166	12.6515	22.0435	14.7474	5.20432	10.7056	6.78182	12.2943	1.54623	-0.197458	-0.152456	0.00015504	-0.469351	-0.350036	0.757632	-0.409284	-0.210453	0.337689
11.5	0.387323	-0.472581	0.190563	-0.106302	-0.220703	-0.438858	-0.150359	-0.33364	-0.271039	0.106686	-0.201117	0.0837276	-0.293057	0.405131	-0.235561	-0.112677	0.0653291	0.199627	-0.195031	0.0965981	0.0580286	-0.132208	-0.052509	0.178946	0.0239089	0.132714	0.292796	-0.309395	-0.479124	0.48845	0.103679	0.484257	13.6221	17.761	14.3759	4.23505	11.8817	6.06209	11.7369	1.76294	-0.45443	-0.286462	-0.0351394	-0.344294	-0.234879	0.0694203	-0.222016	-0.53056	-0.304129
12	-0.164898	0.43534	-0.295959	-0.368732	-0.131103	-0.170744	0.0950425	-0.278203	-0.171953	-0.407602	-0.171104	-0.307084	-0.121995	-0.273633	-0.416775	0.34674	-0.181942	-0.0793032	0.10023	-0.0894894	0.450879	-0.0239226	0.294593	-0.0501686	0.295257	0.560185	0.0222672	-0.273207	-0.319651	0.0969331	-0.02449	0.235253	12.7697	16.9176	13.1828	5.43227	10.5544	6.28506	11.2416	1.22537	-0.48543	-0.294726	-0.113882	-0.0881713	-0.136494	0.158925	-0.290219	-0.410161	0.234418
12.5	-0.367998	0.0424831	-0.180068	-0.457109	0.155954	0.284323	-0.159914	-0.604403	-0.379252	-0.252934	-0.306526	-0.497271	-0.417088	-0.110571	-0.273766	0.632742	-0.0447623	0.446321	0.110605	0.145745	-0.0394929	-0.0917191	-0.0364628	-0.311938	-0.411749	-0.0004841	0.82792	-0.259091	-0.377345	-0.139967	0.213466	-0.042653	13.5271	19.7898	14.5795	5.18644	10.1497	6.45898	12.07	1.17708	-0.103118	0.587916	0.16275	-0.335965	0.407119	-0.333956	-0.0962645	-0.349886	-0.136438
13	-0.261671	-0.115533	-0.156356	-0.377466	-0.0524548	-0.0930327	-0.0740007	-0.145439	-0.321457	-0.203952	-0.550201	-0.0585981	-0.0056103	-0.459234	0.150293	-0.147712	0.0326525	0.0377825	-0.0409612	0.265067	0.198487	-0.145831	-0.236876	-0.0656507	0.490155	0.0893621	0.564898	0.384629	-0.638301	0.303639	0.5596	0.339655	11.5593	18.3473	13.56	5.85673	10.8584	5.5499	10.6624	1.61104	-0.0877027	-0.133323	0.100322	0.214736	0.220595	0.111237	-0.191786	-0.314884	-0.434946
13.5	0.176018	-0.329025	0.0190452	-0.491756	-0.323217	-0.0773989	-0.383296	-0.240681	-0.295404	-0.38376	-0.385593	-0.211721	0.0763538	0.697025	-0.0355543	-0.496693	-0.364146	0.0789129	0.0599373	-0.20053	-0.17762	-0.305261	-0.150543	-0.279538	-0.177667	0.268365	0.701689	0.472641	-0.12477	0.395394	0.457533	0.361373	15.0086	17.7361	15.057	4.65053	11.0048	7.39965	10.8674	0.903908	-0.242984	-0.526101	0.184476	-0.294305	-0.215501	-0.235875	-0.204195	-0.347672	-0.0416986
14	-0.395881	-0.393361	-0.151989	-0.394154	0.310982	0.0154875	0.0353851	-0.285255	-0.21183	-0.65598	-0.629761	-0.0344865	0.0178045	-0.151599	-0.167658	0.174632	0.341886	0.152026	-0.247224	-0.0096777	-0.362354	0.314397	-0.396009	-0.182084	-0.0342049	0.162179	0.97851	-0.24568	-0.330203	0.373815	-0.388587	-0.056544	14.8064	17.9633	14.6746	5.67812	11.2581	5.765	12.0027	1.24986	-0.106901	-0.179346	-0.0801488	0.42467	0.264828	-0.103072	-0.0784657	-0.193655	-0.168837
14.5	-0.474591	-0.376933	-0.0704191	-0.15914	0.00575967	0.167658	-0.0370537	-0.365108	0.104582	-0.0063224	-0.231064	-0.0814231	0.0220842	-0.279418	0.0765191	0.00707355	0.0389343	0.376611	-0.0497366	0.153307	-0.0918435	-0.199169	-0.0159619	-0.0989537	-0.0969203	0.14095	0.723283	-0.107576	-0.494744	0.16344	0.093201	-0.0678854	14.1018	16.0404	13.7884	5.35985	10.1251	5.99029	13.6392	1.47047	-0.308314	-0.288088	0.444301	-0.103452	-0.203193	-0.0894812	-0.426936	-0.503734	-0.246772
15	-0.184068	-0.232105	0.345222	-0.158476	0.197873	-0.187034	-0.124477	-0.169267	0.207072	-0.258254	-0.0753797	-0.335512	-0.376447	-0.588592	0.186407	0.0198458	0.588415	0.334894	-0.12903	-0.218864	-0.316522	-0.0427307	-0.533958	-0.150379	0.0988484	0.318052	-0.168868	-0.0669196	-0.356315	0.0149913	-0.0117502	0.336043	10.4662	17.0202	14.5633	6.78724	11.2485	6.18157	12.2755	1.96539	-0.0154129	-0.255789	-0.445933	-0.31201	0.154525	0.233198	-0.123511	-0.288804	-0.0710586
15.5	-0.228831	-0.402933	-0.221195	-0.241454	0.292839	-0.108142	-0.351742	-0.336268	0.08808	-0.052312	-0.0501583	-0.304051	-0.206779	-0.0873897	-0.592501	-0.169128	-0.156932	-0.10139	-0.408214	0.103782	-0.395152	-0.237591	-0.135944	0.566141	-0.234065	0.115843	0.450251	-0.0602014	-0.434485	0.44001	0.526193	0.226109	8.83598	14.7693	14.2841	4.84163	10.4783	4.98076	10.9698	1.0699	-0.2651	-0.218114	0.0910965	-0.206629	1.454	-0.105153	-0.031788	-0.18861	-0.26603
16	-0.526844	-0.453692	-0.513351	-0.0342028	-0.011826	0.27037	0.0629655	-0.421787	-0.272456	-0.141689	0.157915	-0.122423	-0.319153	-0.0870546	-0.224798	-0.0604577	0.768375	0.163739	-0.249288	0.0266536	-0.0092692	-0.252891	-0.431812	-0.273513	-0.0317238	-0.0028338	0.604036	0.164601	-0.18924	-0.142127	-0.161862	0.600981	10.8268	14.9715	12.8012	5.08298	9.5197	6.21036	11.8515	1.46205	-0.321846	-0.552012	-0.0900997	-0.160193	0.550097	0.209249	-0.706193	-0.498218	-0.0905981
16.5	-0.3689	-0.280404	-0.459961	-0.348103	0.101192	-0.353942	0.180115	-0.0872117	0.233574	0.0569978	-0.0608033	0.0771992	0.0285409	-0.50218	-0.04646	0.216509	0.770357	0.11798	-0.506761	-0.285709	-0.0236805	0.114801	0.0242759	-0.0465306	0.103887	0.239323	0.2027	-0.167475	-0.46496	0.0662959	0.307577	-0.0123	9.99089	14.2533	12.9243	4.78293	10.0732	6.45107	9.8473	1.1442	-0.152773	-0.510498	0.497319	-0.369949	0.211879	0.0535383	-0.49858	-0.0758319	0.309276
17	-0.395637	0.00798087	-0.247952	-0.0958729	-0.192099	0.107895	0.514265	0.166084	0.0283852	-0.393835	-0.618656	0.390049	-0.139089	0.0250237	-0.149742	-0.233766	-0.0474381	0.243795	-0.191496	-0.188203	-0.120576	-0.374834	0.0155371	-0.218099	0.0980547	-0.0664873	0.181676	-0.0576262	-0.22514	0.48892	0.113246	-0.110521	9.49895	12.7054	12.6896	6.0029	10.7424	5.04553	11.9034	1.93095	-0.46139	0.149395	0.445293	-0.17447	0.0177152	-0.0856653	0.0328065	-0.256163	-0.0385649
17.5	-0.459551	-0.218155	-0.147166	-0.396241	-0.0400106	0.2141	-0.224236	-0.0125143	-0.259597	-0.321501	-0.478706	-0.115303	0.351156	-0.0540647	-0.061997	-0.509041	0.122633	0.358932	-0.257472	0.328279	0.53761	0.274554	-0.140591	0.141355	-0.118557	0.0219582	-0.348155	0.051731	-0.365188	0.433633	0.448798	1.97537	9.21063	12.7161	11.5689	6.57649	9.11048	6.80779	9.93249	1.81993	-0.0240608	-0.610977	0.109545	-0.141988	-0.185432	-0.010469	-0.149748	-0.15316	-0.11182
18	-0.0490687	0.0400724	-0.293141	-0.291503	0.170447	-0.192011	0.0749456	0.0796691	-0.16301	-0.305654	-0.224221	-0.307468	0.102824	0.0836732	-0.271556	0.670917	1.23552	0.365847	-0.109208	1.00457	0.273618	0.164756	-0.0837733	0.64976	-0.380777	-0.0237433	0.328479	0.0147255	-0.339121	0.89905	0.101678	0.688331	10.8827	10.6484	12.3925	8.004	8.79166	4.93805	10.3515	1.33591	-0.286696	-0.227357	0.081111	0.368906	-0.424548	-0.170525	-0.215258	-0.163485	-0.42715
18.5	-0.274139	-0.208974	-0.319926	-0.225428	-0.030615	-0.268805	-0.483782	0.0135737	-0.0238987	-0.218142	-0.58081	0.099664	-0.214185	-0.557222	0.0946009	-0.390103	0.0600036	-0.0461228	-0.414689	0.146086	0.182882	0.136317	-0.203779	-0.242365	0.0416586	-0.0615764	0.294035	0.0604174	-0.187577	0.681439	0.213674	0.634374	9.01519	9.35399	11.1004	6.93115	8.80753	5.18444	8.95104	2.21367	0.0783001	-0.0903812	-0.282194	-0.155166	-0.566929	-0.189249	-0.347841	-0.166722	0.0996723
19	-0.314506	-0.349781	-0.274608	0.0314627	0.0404631	-0.0706511	0.186702	0.108344	0.113889	0.017097	-0.451568	-0.304642	0.207519	-0.0278033	-0.193199	-0.26231	0.257783	0.30383	0.232721	-0.177882	0.152685	-0.382982	0.104472	0.176929	0.187858	2.20033	-0.073503	0.0862805	-0.459804	-0.165763	0.0650718	0.230682	8.74373	11.0395	10.0703	7.13857	7.80579	4.32449	7.5568	1.40713	-0.0119545	0.112786	0.33804	-0.169045	0.179771	-0.113035	-0.30347	-0.163591	-0.171914
19.5	-0.240867	-0.238588	0.0292773	0.236121	-0.276268	0.0985482	-0.120111	-0.327974	0.212825	0.0722807	-0.0273522	-0.0050558	0.246869	-0.479074	0.083933	-0.222439	0.356886	0.369861	-0.352846	-0.257315	0.120247	-0.0458229	-0.0896981	-0.0760796	0.0806378	-0.0181718	0.201674	-0.0779916	-0.203946	0.516513	-0.217756	0.082998	9.73224	8.52187	9.0156	6.10956	7.62689	4.80785	8.97715	1.27792	-0.453023	0.0519451	-0.331362	-0.295855	0.0995075	-0.209521	-0.346613	-0.20794	0.18244
20	0.00650762	-0.197366	-0.0561002	-0.295266	-0.232925	-0.23197	0.147496	-0.0991967	0.641785	-0.0331547	-0.32877	-0.0614518	-0.256936	-0.294486	-0.491783	0.0288423	-0.0342288	0.128186	-0.478626	-0.149753	-0.210923	-0.452584	0.3243	-0.26758	-0.289081	0.0307228	0.237285	0.207366	-0.60889	0.113879	0.134252	0.112467	6.26144	9.57363	8.79685	6.06979	7.65743	4.90413	6.6874	1.35081	-0.131112	-0.27299	-0.0416947	-0.444647	0.0689884	-0.129609	-0.0918394	-0.0455978	-0.0347903
20.5	0.03837	-0.181515	-0.468618	-0.191581	0.0502152	-0.381061	0.312809	-0.505289	-0.301639	-0.493845	-0.503461	-0.384787	0.0195702	-0.230051	0.073503	0.0602079	0.0650182	0.106574	-0.0533515	0.213536	0.0102242	-0.0811881	-0.167315	-0.4042	-0.191095	0.00917898	1.90575	0.0285347	-0.360587	0.625996	0.468919	0.149177	6.22404	6.24534	8.67858	6.49394	6.64814	5.16616	7.57603	2.15629	0.0286649	-0.345455	0.269736	-0.331764	-0.0260713	-0.138208	0.00750795	-0.304642	0.160239
21	-0.321228	-0.309203	-0.420636	-0.0967493	0.0854534	0.0323869	0.292208	-0.161909	-0.371962	-0.511384	0.669559	0.00753803	0.136057	0.261458	-0.129001	-0.0769704	-0.0824557	-0.0707721	-0.253007	-0.264158	-0.14793	-0.0557765	-0.163521	-0.549999	0.497573	0.378671	0.273037	-0.123283	-0.246695	0.281851	0.320603	-0.0741435	6.67966	4.77475	7.53196	4.69935	5.5133	3.4028	6.61617	0.944903	0.076506	-0.437949	-0.378473	0.0860263	0.00699341	-0.155222	-0.136906	-0.205216	-0.154337
21.5	-0.29404	-0.369467	0.183962	-0.180411	0.0406657	-0.327433	-0.11567	0.0649948	0.26065	-0.014773	-0.55582	-0.225753	0.311092	0.150361	-0.172765	-0.0323028	0.298532	-0.295913	-0.238937	-0.380301	-0.0168326	-0.155975	-0.432217	-0.0545026	-0.0562001	0.3792	-0.314453	0.259214	-0.289835	0.241374	0.328557	0.121139	5.06607	6.18128	6.69765	5.64415	5.77424	4.99913	5.90101	1.74668	0.199013	-0.0040219	-0.404809	0.237144	-0.2394	-0.0740157	-0.225263	-0.353207	0.185141
22	-0.0973236	-0.0973559	-0.187123	0.00063748	0.0316713	-0.0714379	-0.238155	-0.233854	0.160028	-0.509763	-0.137752	-0.349111	0.0460401	-0.488428	-0.263574	0.208219	0.167897	0.451703	-0.442051	0.232665	-0.131818	-0.200617	-0.197451	-0.114527	-0.32911	0.905781	0.725595	0.154677	-0.473099	0.178513	-0.038971	0.00178744	5.18264	4.62893	5.04581	5.55377	5.02579	3.04437	5.05257	1.19281	-0.32896	0.175615	-0.363722	-0.323288	0.259767	-0.302217	0.0686885	-0.362406	0.271685
22.5	-0.291261	-0.0273182	-0.15082	0.248052	0.0867236	0.0554898	-0.0675446	-0.178234	-0.295615	1.48858	-0.412694	-0.183446	0.0445806	-0.0232937	-0.442982	0.0248546	0.00714242	-0.0788008	-0.119893	-0.45894	-0.511541	-0.605092	-0.32698	-0.287092	-0.185264	-0.0282049	0.00811013	0.150276	-0.336213	0.189939	0.208891	-0.0805998	4.50854	5.28357	5.97002	6.06756	4.92536	3.83717	5.05312	0.984074	-0.222751	-0.0677762	-0.538855	0.238694	-0.255843	-0.314054	0.241023	-0.0204127	0.0150147
23	0.0725236	-0.134318	0.0549695	-0.0825946	-0.0726902	-0.145285	-0.0148104	-0.142281	-0.347447	0.188564	0.122349	0.0194675	-0.0331008	-0.111436	-0.475176	-0.270073	-0.0500182	0.163572	0.00472689	0.384272	0.202283	-0.384914	0.0756377	-0.093831	0.0326557	0.0510796	-0.0815826	-0.0902097	-0.259647	0.505243	0.159573	-0.316438	4.22561	4.00058	4.54395	5.23014	3.59707	3.28098	4.86433	0.549692	0.11157	-0.145818	-0.167279	-0.0866967	-0.220475	0.129915	1.27508	-0.178859	-0.133531
23.5	-0.292088	0.0511037	0.540907	-0.147206	0.385044	0.0975666	0.112528	0.0240285	-0.197041	-0.347666	0.331054	-0.268527	0.16715	-0.535129	-0.113581	-0.487202	-0.228521	0.0214993	-0.477388	0.225973	0.241748	-0.0060437	-0.423395	-0.0362409	0.171207	0.281567	0.5669	0.161465	-0.448141	0.505138	0.0980627	0.149078	4.16962	3.86034	3.93962	4.82493	3.27831	3.27891	4.35973	1.39934	-0.408469	-0.0348629	0.245458	-0.139512	-0.118585	-0.341467	0.0817952	-0.19442	-0.305413
24	-0.271547	0.122059	0.436158	0.125651	-0.26231	0.231852	0.404058	-0.0889644	-0.16042	-0.310829	-0.0752474	-0.362683	0.0563034	0.0379475	-0.303988	-0.135258	0.167993	0.00362508	-0.10895	-0.0036672	-0.230148	-0.0264345	-0.511752	-0.08491	-0.15475	0.338647	0.186778	-0.0388071	-0.172062	0.0695244	-0.310282	-0.0516786	4.32288	3.3148	4.20019	4.51426	3.85893	3.56978	3.81893	0.61831	-0.490877	-0.166825	0.295236	-0.0027235	-0.168272	-0.164562	0.0629395	-0.20924	0.0398991
24.5	-0.230051	0.253989	0.225826	-0.111138	-0.200445	-0.0114781	0.0365619	-0.0067481	0.421418	-0.284067	-0.265703	-0.413449	-0.139497	0.0924259	0.0805126	-0.221418	-0.0046801	-0.11006	-0.455705	0.148016	-0.384626	-0.0839901	-0.145641	0.0192424	-0.0672745	0.459381	0.113771	-0.0173659	-0.199238	0.225627	0.286467	0.0822713	4.16924	3.7301	3.54524	3.77231	3.29866	2.46984	3.68776	0.966065	-0.0668422	-0.252065	0.356523	0.269502	-0.136374	0.0665762	-0.148017	-0.0134495	-0.0716427
25	0.703435	0.242671	-0.286286	0.38804	0.158091	-0.215027	-0.0700832	-0.292612	0.0312766	-0.593576	0.0456651	0.0841908	0.0572218	-0.360158	-0.165139	0.0375209	-0.246626	-0.0955052	-0.0568091	1.18208	-0.0029002	0.0907108	-0.167742	-0.0454635	0.0923266	0.272034	0.0312057	0.202707	-0.107503	0.169661	-0.0692578	0.172643	2.45758	3.91166	2.93359	3.4644	3.0875	1.72645	3.39996	0.828504	-0.615267	-0.147217	-0.126993	0.152746	-0.129877	0.0172707	0.113397	0.880337	0.0377086
25.5	0.0753599	0.039955	0.107343	0.112647	3.18552	-0.0110628	0.19747	-0.102641	0.387565	-0.30657	-0.51133	-0.435965	-0.253844	-0.410991	-0.108828	0.0774623	0.0878308	-0.0666157	-0.076582	0.596597	0.126015	0.246824	-0.198665	-0.0978866	0.077747	0.0898642	0.50512	0.240723	-0.422284	0.399142	0.0856873	0.476567	2.72643	2.93001	2.56066	3.79006	2.74725	1.98068	2.45397	0.812431	-0.0601398	-0.433188	0.167592	-0.134911	-0.0186146	-0.111834	-0.029024	0.062346	-0.13929
26	-0.0409767	0.13258	-0.065824	-0.303962	0.0477883	-0.287715	0.267183	-0.0620195	4.96747	-0.365978	-0.0883679	-0.262487	0.118693	-0.379246	-0.134893	-0.0137416	0.0493722	-0.0529537	-0.383975	-0.0068427	0.109454	-0.300367	-0.287768	-0.119139	-0.0752044	-0.0066875	-0.0438267	-0.0577433	-0.366808	0.233619	-0.239621	0.535213	2.17261	2.08243	2.77538	2.98397	1.62549	1.57482	1.47694	0.984264	0.0720955	-0.326854	-0.0501541	0.295059	-0.076178	-0.0836311	-0.373501	-0.136403	-0.245318
26.5	-0.0624574	0.500678	-0.284052	-0.0379269	0.525491	-0.205811	-0.0963187	-0.0694809	-0.203608	-0.0873514	-0.478736	-0.0628131	0.520449	-0.79084	0.13713	-0.169304	0.305436	0.219704	-0.206233	0.740755	-0.561587	0.208495	-0.0332221	-0.0212691	0.268886	0.0894149	0.0609276	0.0939594	-0.47854	0.0765004	0.0124779	0.397377	2.59912	2.75337	2.24467	2.41004	2.5533	1.05659	1.82605	0.383691	-0.161962	-0.044975	0.0952898	0.0588438	-0.107174	-0.0985875	-0.279132	-0.131464	-0.383763
27	0.332497	-0.252793	-0.15369	0.151602	-0.0215558	0.0950332	-0.116808	-0.0120265	-0.187465	0.187894	-0.0675772	-0.20473	0.0442064	-0.659565	-0.0120326	0.17696	-0.0267514	0.061904	-0.272157	2.06151	0.755022	0.0985366	-0.137371	-0.292331	0.206452	-0.0504358	-0.0171566	0.581133	-0.15932	-0.415338	-0.444612	0.243259	2.23084	1.54287	0.964015	2.71461	1.67524	1.80264	1.68845	0.664445	-0.0335291	-0.487557	0.299773	-0.0718413	-0.21697	-0.238348	-0.0151711	-0.1624	0.1056
27.5	0.118901	0.144053	-0.224646	0.350178	-0.0486241	-0.0966351	0.0659694	-0.331642	-0.389793	-0.438838	-0.28385	-0.444372	0.493571	0.0591009	0.0133658	-0.569515	0.139138	-0.143522	-0.0994765	0.545482	0.291049	0.102529	0.0781298	0.256514	0.0661861	0.187101	-0.227216	0.268437	-0.469696	0.385346	-0.119408	0.0846853	2.19781	1.11368	1.95113	2.26625	1.4132	1.42991	2.01139	0.635365	-0.0251841	-0.0908579	0.147583	-0.286652	-0.303644	-0.191515	-0.0287111	-0.343115	0.0356881
28	0.00140056	0.286184	0.309857	-0.0420023	-0.0096017	-0.0715691	0.591967	0.426514	0.152831	-0.293787	-0.0767995	-0.0267768	0.554635	-0.0356568	0.0892064	-0.145031	-0.2622	0.225393	-0.124307	0.247751	0.490641	-0.344364	0.207107	0.0928482	-0.0151238	0.330279	0.93146	0.0919699	-0.320655	0.681517	-0.232888	0.293957	1.7838	1.15452	1.69291	1.53761	1.08564	1.44507	1.7591	0.641377	-0.218514	-0.304754	-0.237333	-0.108777	-0.408648	-0.224802	-0.432132	-0.0953984	-0.146652
28.5	-0.0698353	-0.387948	0.164362	0.150939	0.400517	-0.0727255	0.483195	0.0614282	0.170388	-0.134681	-0.126184	-0.39268	0.337225	-0.0686809	-0.512051	-0.370274	0.510212	0.175199	-0.4444	-0.0953107	-0.141144	-0.201842	-0.147879	-0.0803672	-0.319698	0.79104	0.130336	-0.155679	-0.432851	-0.0135639	-0.114936	0.124044	0.965802	3.62356	1.32451	1.3207	1.38979	0.792941	1.61729	-0.0097504	-0.25055	-0.196266	0.245499	-0.176821	0.445605	-0.0542969	0.0689293	-0.203832	0.0100306
29	-0.26259	-0.014267	-0.209847	0.0184577	-0.0939041	-0.024493	0.0140758	0.0535199	-0.384462	-0.514166	-0.0921369	-0.390752	-0.113704	-0.0829211	-0.172883	-0.11363	0.172149	0.41785	-0.217024	0.1186	-0.0617668	-0.122609	-0.350551	-0.367373	0.129746	0.23877	-0.12308	0.135576	-0.410728	0.579609	-0.0942926	-0.223907	2.18012	1.37327	0.722756	1.60312	1.04328	0.229369	1.02064	0.78454	-0.318128	-0.0876384	0.305565	-0.0922242	0.531919	-0.0407983	0.140619	-0.253674	-0.503877
29.5	0.0458623	-0.248279	0.56038	-0.163526	0.188768	-0.0250811	0.252145	-0.176175	-0.221828	-0.631186	-0.192457	0.174233	-0.435778	-0.209985	-0.250482	0.351081	-0.0925828	0.30347	-0.0394626	-0.0085836	-0.411535	-0.202774	-0.255076	-0.0668085	0.529851	0.820346	-0.180736	-0.0719977	-0.0970688	-0.0019286	-0.0172364	0.154435	0.557088	1.00231	0.708692	1.12089	0.56435	0.634068	1.32276	0.146524	-0.323554	-0.314109	-0.149062	-0.152665	-0.0647667	-0.138231	-0.151889	-0.162762	-0.0465521
30	-0.181629	0.503614	0.468552	0.0709817	-0.152228	-0.0906959	0.181738	-0.11654	0.415334	-0.256773	-0.0359128	0.012808	-0.301994	-0.160392	-0.5317	-0.278681	-0.007095	0.541633	-0.0781041	0.160567	0.274037	-0.121738	-0.145769	-0.449185	-0.369213	0.327953	0.366185	0.360425	-0.510618	0.134054	-0.0909403	-0.267937	1.03704	0.770256	1.06972	1.78615	0.503267	0.286252	0.607401	0.93284	-0.0698914	0.177631	-0.0820183	0.0009767	0.215201	0.0741133	-0.029094	-0.35161	-0.07506
30.5	-0.189984	-0.099223	0.0835034	-0.0708777	-0.304383	-0.195025	0.25289	0.142116	-0.0831988	0.184372	-0.144628	0.0816201	0.383303	0.178503	-0.170246	0.156353	0.136845	-0.0715232	0.0904986	-0.182609	-0.173283	-0.370904	-0.155615	-0.24065	0.0844223	-0.424073	0.131646	-0.103506	-0.177758	4.99308	-0.128767	0.401773	1.10498	0.606932	0.491762	1.02662	0.137498	0.471776	0.63885	0.457778	-0.215077	-0.390693	0.280485	-0.266797	-0.0970519	-0.204576	0.110847	-0.105448	0.093592
31	-0.0941507	-0.151376	0.150475	-0.264033	-0.063005	-0.248981	-0.0609951	-0.0797726	0.444064	-0.551811	0.184589	-0.0065972	0.426766	-0.301583	-0.248344	0.229214	-0.107392	-0.006497	0.12475	0.101284	0.147813	-0.375444	0.0120424	-0.149222	0.151742	-0.207287	-0.167675	0.211417	-0.178224	0.537389	0.126895	-0.158925	0.755697	1.36022	0.555898	1.46282	0.387829	1.49514	1.02418	0.464373	-0.0607024	-0.299628	0.117547	0.0398377	0.0140604	-0.389227	-0.431554	-0.448036	-0.173878
31.5	-0.182155	-0.091909	-0.0972018	0.378839	0.0420007	-0.194107	0.346173	-0.0537254	0.261614	0.062984	-0.166772	0.142591	0.78095	-0.318306	-0.268992	0.280445	-0.0168395	0.0234786	-0.179209	0.250208	-0.356015	0.0832691	-0.337231	-0.0561476	0.0688465	-0.0495636	0.0336849	0.363094	-0.437439	0.462449	-0.0095405	-0.0188741	0.283094	0.218189	0.499672	1.19922	0.392145	1.64571	0.596581	0.291129	-0.272687	-0.391982	-0.381293	-0.255943	-0.0151097	0.07624	0.114237	-0.291933	0.148627
32	-0.30433	0.0249007	0.0714185	-0.269258	0.32436	-0.235725	0.346845	-0.164333	-0.38913	-0.171835	-0.256282	-0.151725	0.523307	0.113316	-0.267208	-0.412543	0.393456	0.639228	-0.122164	-0.0058966	0.318821	0.11828	0.130556	0.27195	-0.265883	0.0572302	-0.0432801	0.432472	-0.561733	0.452531	-0.204941	0.368221	0.937399	0.753307	0.339785	1.07466	-0.213186	0.260998	0.243519	0.41446	-0.328051	-0.10604	0.0316759	0.0830771	-0.386333	0.325616	-0.210209	-0.275391	0.393121
32.5	-0.140659	-0.0504834	0.0954867	0.140293	-0.0231805	0.0885039	0.186515	-0.132336	-0.201651	0.0660124	0.537575	-0.269015	-0.171879	-0.335514	-0.376432	0.19467	-0.0677183	0.0829273	-0.101851	0.171493	-0.305817	-0.154882	0.0753391	-0.316989	-0.503086	-0.151106	0.018311	-0.402391	-0.447617	0.312228	-0.239647	-0.283614	0.521285	0.606537	0.719302	0.957311	-0.155971	-0.281764	0.516027	0.497253	-0.297051	-0.364756	-0.0577014	0.0263364	-0.113704	-0.273853	-0.0285666	-0.227719	8.20695
33	-0.0548524	-0.106114	0.0914252	-0.339037	0.0995669	-0.432373	-0.205221	-0.102131	-0.206439	-0.382706	-0.224254	-0.173678	0.120629	0.447551	-0.0782021	0.0273589	-0.0741676	0.820452	-0.451318	-0.499699	-0.416498	0.0234889	-0.214393	-0.346538	-0.294579	0.0888071	0.223746	-0.0143008	-0.255165	0.367152	-0.0211873	-0.355367	0.521758	0.268955	0.399621	1.27589	0.323578	0.438696	0.640085	0.0434195	-0.199079	-0.421029	-0.36856	-0.226835	0.0715939	0.193161	0.133957	-0.225526	1.12284
33.5	0.142203	0.186532	0.103281	0.111556	0.151925	-0.223585	0.0297135	-0.0159992	-0.0286867	0.0784079	-0.151203	-0.233671	0.107005	0.104714	-0.181627	-0.0331472	0.629045	-0.153728	0.019593	0.263629	0.407199	0.188139	-0.226816	-0.402834	0.0115031	0.428596	-0.119267	0.0534649	-0.45667	0.667461	-0.292058	0.00916502	0.375495	0.360124	0.364116	0.462886	0.594737	-0.0927635	0.550799	1.40459	0.598772	0.0356974	0.644972	-0.150715	0.265728	0.0138251	0.255717	-0.401942	0.58509
34	0.0622719	0.757729	0.0740591	-0.146914	-0.118815	0.26585	0.165243	0.042351	0.136086	0.388023	-0.399805	0.283991	-0.237158	-0.225729	-0.0916029	0.445566	0.343581	-0.231917	0.0594981	0.292061	0.109514	-0.459349	-0.43339	0.0503901	-0.127893	0.0136934	-0.0680675	-0.0903034	-0.449415	0.547799	-0.0329122	-0.341847	1.11532	0.709607	0.730227	0.840215	-0.141816	0.182144	0.0213157	6.25906	0.063536	-0.0286457	-0.0806101	-0.013551	0.364892	-0.0203621	-0.182623	-0.0509646	0.381246
34.5	-0.286605	0.26363	-0.0832895	-0.160951	0.435223	-0.201314	0.0966472	0.0672983	-0.044769	-0.0341418	0.0674785	-0.218533	0.174389	0.101291	-0.153424	0.0450725	0.179507	0.364286	-0.0669022	0.606464	0.408336	0.0773749	0.132496	-0.109522	-0.255344	-0.101497	-0.118909	0.216823	-0.289761	0.285573	-0.161081	0.602668	1.67539	0.536492	0.0020852	0.398542	0.393408	-0.0674615	0.00752156	1.05214	-0.0934765	-0.252766	0.212834	-0.0269795	0.193131	-0.184255	-0.0549244	-0.393936	0.260565
35	0.157242	0.592437	-0.0973034	0.128479	-0.147198	-0.223956	-0.101039	-0.123775	-0.0336555	-0.0889377	0.0873789	-0.0453096	0.149786	0.242486	0.150198	-0.164649	0.198257	-0.0107093	-0.389575	0.166391	0.179084	0.308503	-0.209106	-0.0669013	-0.347218	-0.037498	0.197766	-0.178852	-0.237912	0.134416	-0.141999	0.237824	0.089004	-0.0538275	0.325186	0.713886	0.105992	-0.0771156	0.762179	0.836563	-0.0294648	-0.549266	-0.239241	-0.148289	-0.254316	-0.0470627	1.60764	0.400614	0.164448
35.5	0.753643	0.205555	-0.271944	0.672266	-0.17883	0.227747	-0.145881	0.0251896	0.0787123	-0.105522	0.460097	0.0984804	0.0891281	-0.182558	0.0103972	0.14972	-0.0045845	0.899754	0.245551	0.239848	-0.148678	-0.0074623	-0.279072	0.0140754	-0.0909082	0.185623	-0.0007351	0.0962066	-0.263784	0.565397	-0.0561821	0.90878	0.643661	0.673332	0.321955	0.169476	-0.043729	0.00144878	0.113576	0.495163	-0.334191	-0.29299	-0.0197397	0.173199	0.294688	0.143485	-0.0222179	0.465189	0.302799
36	0.291058	0.0436877	-0.290805	0.0846307	-0.0300134	-0.18402	-0.150377	0.439517	-0.0085071	-0.233883	-0.15385	-0.0981829	0.361623	0.259807	-0.253809	-0.389503	0.591306	0.0380616	0.165534	0.119357	-0.151698	-0.27927	-0.0199666	-0.293375	0.101202	0.0448738	0.22949	0.360144	-0.263259	-0.262386	0.0911735	0.0225061	0.692224	0.607416	0.388539	0.198052	-0.166764	0.281954	0.722853	0.0406023	-0.254398	-0.347191	-0.161677	0.155322	-0.24671	0.426703	-0.213141	-0.114283	0.283919
36.5	0.0265976	0.0611851	0.133948	-0.165163	0.0279317	-0.0216536	0.196648	-0.470315	0.173641	-0.337171	0.143176	-0.139412	-0.235661	0.159941	-0.0256929	0.363638	-0.122918	-0.0018686	-0.108355	-0.10877	0.0583578	-0.339243	-0.231207	-0.339402	0.134888	0.316628	0.155505	0.116101	-0.148259	0.15709	-0.167944	0.955703	0.82316	0.253805	-0.338725	0.566171	-0.0570169	0.139889	-0.120936	0.125231	-0.432682	-0.285203	0.264364	-0.272197	0.0828253	-0.0200403	0.045841	-0.417292	-0.181542
37	-0.216796	0.0507469	0.0242248	-0.158964	0.137212	0.161216	0.183885	0.0356055	0.0713043	-0.244378	0.425123	-0.157793	0.122633	0.203974	0.0222283	0.0598194	0.350915	0.123583	0.366478	0.433309	-0.173972	1.23959	-0.141122	-0.139048	0.28395	0.178785	0.0559237	0.123077	-0.258523	0.316108	0.885715	0.600588	0.61736	0.817513	0.770191	0.332407	0.00843805	-0.130716	0.403359	0.290481	-0.0744081	-0.199374	0.241799	-0.276348	0.00573427	0.0234889	0.0216257	-0.454658	-0.175991
37.5	-0.218711	0.264427	-0.163947	0.0325734	0.290101	0.0523007	-0.0213226	-0.165149	0.142321	0.461694	5.91506	-0.0880054	0.320811	-0.0796525	0.0864995	0.22713	-0.137012	-0.0726397	0.413068	-0.0662767	0.0104037	-0.136393	-0.285445	-0.0388834	-0.297188	0.172817	-0.0289777	-0.250665	-0.322858	0.0825644	0.391499	0.772758	0.219988	0.359641	0.248366	0.485544	-0.0270508	0.567096	-0.241734	0.506542	-0.0508447	0.00370938	0.0377352	-0.0887721	0.384507	-0.0220976	-0.26766	0.0999464	0.0221515
38	0.0913372	0.0168068	0.121331	0.0613317	0.17461	0.0124513	-0.432148	0.163536	0.0945233	-0.123554	0.54184	-0.0168542	0.403181	0.0698092	-0.202371	0.0749933	-0.001863	-0.0345213	-0.113725	0.0651041	0.335864	0.337007	-0.0770186	-0.086323	0.354493	-0.008218	0.183726	0.0384608	-0.253876	0.665118	0.839672	0.232546	0.26708	0.111474	0.364462	0.0987131	0.273569	-0.0830566	0.00372393	-0.297727	0.131459	-0.294025	0.408129	-0.362023	0.0674321	-0.336846	-0.282452	-0.403327	0.00935193
38.5	-0.136659	-0.149915	0.0601468	-0.0378489	-0.216696	0.436186	0.0619025	-0.110935	0.102836	0.262443	0.107442	0.254972	0.168204	0.047001	-0.0204671	-0.145558	0.190445	0.370671	0.0697721	-0.33841	-0.0569839	-0.113622	-0.0944087	0.182375	-0.115922	0.347649	0.158652	0.0720496	-0.173231	0.729543	0.0943721	0.0283142	0.0933085	0.393546	0.0446233	0.129944	-0.0434228	0.377951	0.00264711	0.18531	-0.153011	-0.409181	0.143008	-0.113128	-0.0173854	0.224043	0.00594539	-0.278115	0.203134
39	-0.0290163	0.023951	0.0780974	-0.104705	-0.202738	-0.0747562	-0.265082	-0.0433911	0.26598	-0.553323	0.24984	-0.0231511	-0.16991	0.327096	-0.0927186	0.529045	0.110022	-0.340946	-0.353337	0.258485	-0.0311242	-0.0566441	0.0532595	-0.461491	0.41529	-0.167183	-0.0940001	0.0516373	-0.364723	0.140665	0.143377	-0.0812657	-0.261277	0.452261	0.136922	0.0756017	-0.192891	0.200687	-0.0722115	-0.319355	-0.17731	1.14509	0.102456	-0.388805	-0.15794	0.0868252	-0.116608	-0.0748516	-0.143575
39.5	-0.0455387	0.0437387	0.333213	0.528925	0.105111	0.0928713	-0.0241041	-0.104251	0.389009	0.0745335	0.0849666	-0.175579	-0.0278006	-0.0932157	0.076971	0.00926006	-0.0469599	-0.346049	-0.155953	0.297507	-0.476382	-0.153979	-0.23061	0.33895	1.22795	-0.35424	-0.035129	-0.0727943	-0.198473	0.407421	0.266112	-0.172737	0.441855	0.132068	0.369641	0.719669	-0.143609	0.227435	0.0212207	0.0442743	0.239981	0.299313	0.628012	0.351775	0.176836	-0.0155555	-0.20737	-0.0784281	0.0318173
[truncated: 23 more columns]
