# Supplementary material for: Perception of a conserved family of plant signalling peptides by the receptor kinase HSL3
Source: eLife. 2022 May 26;11:e74687. doi: 10.7554/eLife.74687 (PMC9191895; doi:10.7554/eLife.74687)
Supplement: Supplementary file 1. [file elife-74687-supp1.xlsx]

## Sheet: Sheet1
Gene model	Amino acid sequence	Protein length	Cysteine residues	Signal peptide prediction (SignalP5.0)	SP(Sec/SPI) (SignalP5.0)	Gene description	Gene symbol	Col_flg22_005	Col_flg22_010	Col_flg22_030	Col_flg22_090	Col_flg22_180	Col_elf18_005	Col_elf18_010	Col_elf18_030	Col_elf18_090	Col_elf18_180	Col_Pep1_005	Col_Pep1_010	Col_Pep1_030	Col_Pep1_090	Col_Pep1_180	Col_nlp20_005	Col_nlp20_010	Col_nlp20_030	Col_nlp20_090	Col_nlp20_180	Col_OGs_005	Col_OGs_010	Col_OGs_030	Col_OGs_090	Col_OGs_180	Col_ch8_005	Col_ch8_010	Col_ch8_030	Col_ch8_090	Col_ch8_180	Col_3-OH-FA_005	Col_3-OH-FA_010	Col_3-OH-FA_030	Col_3-OH-FA_090	Col_3-OH-FA_180	Col_mock_005	Col_mock_010	Col_mock_030	Col_mock_090	Col_mock_180
AT5G64905.1	MENLRNGEDNGSLIPFTFFDQSSVTIPLLKCSGLESSSSSSSSCDLSSSHSEEDESIDIKEEEEEEEEDGMTIEIKARGKNKTKPTPSSGKGGKHN	96	2		9.1e-05	elicitor peptide 3 precursor;(source:Araport11)	ELICITOR PEPTIDE 3 PRECURSOR (PROPEP3)	0.286535	2.10688	6.62287	6.89967	6.99875	0.237001	2.11275	6.96203	5.13574	2.76607	1.43021	3.38959	5.81164	5.43192	3.77181	0.18319	0.959343	5.72725	5.95771	5.87278	1.14711	3.02685	5.28934	3.75758	1.59395	0.17416	1.74062	4.55405	1.49173	0.33645	-0.415792	-0.00498345	3.38341	1.60424	2.1518	0.316612	0.40315	0.144019	-0.162598	0.389779
AT5G36925.1	MAMKTSHVLLLCLMFVIGFVEARRSDTGPDISTPPSGSCGASIAEFNSSQILAKRAPPCRRPRLQNSEDVTHTTLP	76	3	SP	0.998184	hypothetical protein;(source:Araport11)	ARACIN1 (ARACIN1)	0.901385	2.50833	6.03189	6.7087	6.78297	-0.0996834	2.44265	6.01082	6.00822	4.11977	-0.445867	1.29769	4.52538	4.10975	2.2416	-0.263336	0.756373	4.51294	4.06977	2.27446	0.778589	2.98554	5.79625	5.19889	2.67023	0.366152	1.12407	4.29856	3.08917	1.13966	-0.102623	0.644243	3.18454	2.86665	3.04903	0.0703293	0.417609	0.733824	0.358012	1.0027
AT1G53625.1	MCRILCCCFCRKKKKPLDVKKGKKGKKDGGLVVLKQTKPKKKRRDDVGAVSIDSCCCCGGGDGGGDGGGDGGGGGCGGGGGCGGGGGGG	89	11		0.001345	hypothetical protein;(source:Araport11)		0.301516	1.91036	5.17503	6.30535	5.91198	-0.100426	1.50423	5.36146	3.91867	3.49322	0.0360085	0.976714	3.91846	3.14196	1.70794	0.0916701	0.529023	4.41194	3.94164	3.2905	0.172494	1.74077	4.53376	2.9521	1.78275	0.0989241	0.372236	3.86554	1.2344	1.01731	-0.481026	0.630794	3.09444	1.25626	2.67142	-0.0650595	0.764058	0.366203	0.469724	1.20295
AT5G64890.1	MEKLDKRREEETYLWIPVQFLDQALIAVLKCIGLLCQPAKKTAPSPVTFNQPEEQEEDYGVALKDDDVVVLLRDNKAKSKKRDKEKPSSGRPGQTNSVPNAAIQVYKED	109	2		0.002707	elicitor peptide 2 precursor;(source:Araport11)	ELICITOR PEPTIDE 2 PRECURSOR (PROPEP2)	-0.00815825	1.50864	4.21558	6.12005	6.87977	-0.443876	0.988597	3.97554	4.92756	3.26646	0.603094	2.67339	4.56175	5.46862	3.82623	0.318621	0.732868	2.9021	5.17492	5.47596	0.384452	1.8792	3.67296	4.02502	2.60191	0.459026	0.89679	3.04602	1.42023	0.897704	0.161244	0.489495	2.76891	2.1813	3.03186	0.325796	0.780987	0.634229	0.532509	0.933896
AT1G22810.1	MDYRESTGESQSKYKGIRRRKWGKWVSEIRVPGTRDRLWLGSFSTAEGAAVAHDVAFFCLHQPDSLESLNFPHLLNPSLVSRTSPRSIQQAASNAGMAIDAGIVHSTSVNSGCGDTTTYYENGADQVEPLNISVYDYLGGHDHV	144	2		0.001542	encodes a member of the DREB subfamily A-5 of ERF/AP2 transcription factor family. The protein contains one AP2 domain. There are 16 members in this subfamily including RAP2.1, RAP2.9 and RAP2.10. Overexpression leands to delayed senescence and delayed flowering. Negatively regulates plant resistance to P. parasitica by suppressing PAMP-triggered immunity.	(ATERF19)	0.00364893	1.8879	6.60691	5.93634	2.83056	-0.00970749	2.16597	6.88817	4.30614	0.516979	0.1667	1.68847	5.5124	2.0523	0.0851841	0.0890203	0.689486	4.46661	1.12446	0.819068	0.271922	1.51836	5.72504	3.24239	0.050887	-0.0262888	0.717111	4.37531	0.228301	-0.123318	0.184944	0.922902	4.10031	0.206406	0.29869	0.0204529	0.13557	0.777166	0.134315	0.397186
AT1G51920.1	MASFHSGKSIFLKLFVLFLLLVLPLSQSNATRIPRAPISSRRPICPACVCCEPAPLGSCCRCCASPIVTQTHHHSQSP	78	8	SP	0.999207	transmembrane protein;(source:Araport11)		0.389033	1.0371	2.93135	5.65545	6.0202	-0.124755	1.03277	3.27753	4.81412	2.58547	-0.257618	0.516608	1.78447	3.82939	2.57626	0.169853	0.411314	2.11603	5.0771	5.5443	0.200354	1.28735	2.86217	4.1738	2.02556	0.354175	0.863014	2.77108	2.98317	0.913073	0.154821	0.56094	1.71645	2.77489	3.16205	0.0234026	-0.303778	0.416421	-0.0174113	0.496677
AT3G01830.2	MKSENVNKRDEYQRVFSCFDKSHQGKVSVSTIERCVDAIKSGKRAVVDQEDTTNPNPEESTDDKSLELEDFVKLVEEGEEADKEKDLKEAFKLYEESEGITPKSLKRMLSLLGKKGVIGAVEVCRQEGVAMNPEVRL	137	3		0.000326	Calcium-binding EF-hand family protein;(source:Araport11)		0.139063	2.63613	6.34848	5.61162	4.54043	0.286831	3.02538	6.54666	4.35451	2.09638	0.0799774	2.10286	5.58783	3.49378	1.03632	0.0919925	1.15546	6.20143	4.17687	2.3786	0.801006	3.68217	6.74996	3.81164	1.56161	-0.0376684	1.05544	4.87312	1.50371	0.349425	-0.0304779	0.422552	4.25391	1.2855	1.3331	0.0793756	-0.113089	0.611016	-0.0241952	0.323439
AT3G01830.1	MKSENVNKRDEYQRVFSCFDKSHQGKVSVSTIERCVDAIKSGKRAVVDQEDTTNPNPEESTDDKSLELEDFVKLVEEGEEADKEKDLKEAFKLYEESEGITPKSLKRMLSLLGESKSLKDCEVMISQFDINRDGIINFDEFRAMMQ	146	3		0.000326	Calcium-binding EF-hand family protein;(source:Araport11)		0.139063	2.63613	6.34848	5.61162	4.54043	0.286831	3.02538	6.54666	4.35451	2.09638	0.0799774	2.10286	5.58783	3.49378	1.03632	0.0919925	1.15546	6.20143	4.17687	2.3786	0.801006	3.68217	6.74996	3.81164	1.56161	-0.0376684	1.05544	4.87312	1.50371	0.349425	-0.0304779	0.422552	4.25391	1.2855	1.3331	0.0793756	-0.113089	0.611016	-0.0241952	0.323439
AT1G71520.1	MDSRDTGETDQSKYKGIRRRKWGKWVSEIRVPGTRQRLWLGSFSTAEGAAVAHDVAFYCLHRPSSLDDESFNFPHLLTTSLASNISPKSIQKAASDAGMAVDAGFHGAVSGSGGCEERSSMANMEEEDKLSISVYDYLEDDLV	143	2		0.000768	encodes a member of the DREB subfamily A-5 of ERF/AP2 transcription factor family. The protein contains one AP2 domain. There are 16 members in this subfamily including RAP2.1, RAP2.9 and RAP2.10.		-0.205976	0.222336	6.25073	5.59299	3.54042	0.212339	0.907527	6.96446	3.04864	1.11501	0.451849	1.0249	5.82833	3.72098	2.32663	0.187801	0.492758	5.62831	4.14745	3.5582	0.0349914	0.597136	5.54263	1.78973	1.39903	-0.364753	0.170391	4.91796	0.732524	0.239045	0.11485	0.713482	4.39644	0.653072	0.922362	0.145856	1.14968	1.06672	0.127997	0.628676
AT4G14450.1	MFFDTKVLNYPTIHKSISMASTMQRTSSSAASNERQLSQLQRRAPSLMIKPTSFSNWNVAIPLLSPLAPSLTSSFDQSHVPPPQNKTEIPVEEEVKKTPVFKKWQHPASPFCYEPTTFVPPFIQV	125	1		0.000549	A member of a small family of proline/serine rich proteins of unknown function. It interacts with defense related MAP kinase MPK6. It's expression is induced by PAMP elicitors. May play a role in response to pathogens.	(PH1)	0.439993	2.96372	6.10482	5.50184	5.36884	0.878709	3.87014	7.10232	4.9508	3.20077	0.612678	3.04619	5.3536	3.93001	2.47085	0.411539	1.65134	5.62186	4.27375	3.91815	1.14401	3.69086	5.86107	3.44783	1.44491	-0.258873	1.61425	4.68316	1.20774	0.705655	-0.00040505	0.89638	3.9957	1.70084	2.49563	-0.279481	0.079417	0.531756	0.157661	0.512562
AT1G19020.1	MNGTSWADQWDNSGDSAKGGRIGSGAVVRSSGSGATSNTTKYKEKMGQGLDKTKAVASSGFKKLKTGSAIGFRWVKDKYHKTTHKQ	86	0		0.001403	Modulates defense against bacterial pathogens and tolerance to oxidative stress.	SMALL DEFENSE-ASSOCIATED PROTEIN 1 (SDA1)	0.618029	2.18567	5.26999	5.46814	4.1926	0.346742	2.41315	5.39126	3.91551	1.60423	0.613198	1.99832	4.67223	3.89101	2.6085	-0.154081	0.848006	4.65413	4.48216	3.88971	1.16102	2.96852	5.38915	3.48251	2.11597	0.318963	1.32549	4.45687	1.98702	1.03147	0.122589	0.864098	3.34396	1.59078	1.94884	0.198327	0.802173	0.671189	0.112656	0.758002
AT2G22880.1	MEATSQPCFSHNSSLHSTRKQPAKPWKKPVTGLPQRMHPKVYRVEPVNFKELVQRLTGAEDVEQEVHQVEAKPVKISDDTTTAKDNPFAFDLSPSSSRFWEAFPLLSPANLSRW	114	1		0.000314	VQ motif-containing protein;(source:Araport11)	(VQ12)	0.880285	3.14417	6.09117	5.39768	5.93768	0.725195	3.51015	6.2767	4.67412	3.59583	0.811621	2.78389	5.10552	3.74927	2.70966	-0.0590011	1.41798	5.16262	3.90847	3.90862	1.60817	3.92676	5.73148	3.81093	2.39693	0.145344	1.77955	4.60412	1.64412	0.739691	0.0610082	1.08178	3.92427	1.47984	2.04185	-0.13661	0.386839	0.865404	0.25612	0.723859
AT1G36622.1	MNKVVVYVLALSILLFFGLPNTTLARVQYGSPVSRKEIGKGVWDQKVFNEIKIAVGGSDSVRAHSKDHKSNPNG	74	0	SP	0.980422	transmembrane protein;(source:Araport11)		0.226996	1.21718	4.27279	5.39761	5.28266	-0.117774	1.46325	4.61262	4.85822	3.74907	-0.52039	0.429939	2.87919	2.58313	1.69979	-0.322222	0.178018	3.28854	3.84708	3.45991	0.188031	1.41538	4.14942	3.66272	1.83842	0.257264	0.523675	3.11365	2.51373	0.683601	-0.441667	-0.0107487	1.90637	1.84923	2.07292	-0.318301	-0.180422	0.139868	-0.610103	-0.170959
AT3G18250.1	MARHLLEDVMSMATTTTHFDASYLFHVVFLAVIGCCILSALLFSCADGVSDNRATSGTSTGGGGCGGAGCGGGCGG	76	6		0.017823	Putative membrane lipoprotein;(source:Araport11)		-0.167259	0.21964	1.79504	5.39723	6.10709	0.0235262	0.804089	2.46605	5.17452	4.4636	-0.412122	-0.304634	1.45474	2.41659	1.65281	-0.146743	0.0933963	1.52621	4.48385	4.36882	0.211065	0.578011	2.02969	3.97445	2.26306	0.14736	0.513862	1.88678	2.71793	0.700091	-0.634324	-0.148037	0.780415	2.31381	2.42903	-0.294889	0.0585218	0.260437	-0.487609	-0.490958
AT2G31345.1	MMKKQLVVVVMLVVMFVVFLDATQVEAMRPFPDPVDEIRLLFQALQRGPVRGSGRNGCTNIPRGSGRCHN	70	2	SP	0.990681	transmembrane protein;(source:Araport11)	CTNIP4	0.0549419	1.64895	7.28881	5.37316	4.44341	0.103543	1.94513	7.24951	1.80161	0.848861	0.403547	1.55799	5.10745	3.47347	1.95134	0.304444	0.850916	5.9475	3.31162	2.6087	0.266767	1.94825	5.14307	0.442255	0.0915878	-0.113801	0.690078	3.87378	0.161482	0.10966	0.290393	0.0304063	3.96634	0.314802	0.427632	0.0265694	-0.0822577	-0.000955825	-0.0981785	-0.102466
AT1G51913.1	MANERSSSILFLSVLVLVLVFSPTLQCQAARVHLDVEGHMLLRAPVPIRFCPACACCAPAPKGSCCPCRCTNNPQRM	77	9	SP	0.998216	transmembrane protein;(source:Araport11)		0.135306	0.537885	3.58006	5.29456	5.64856	-0.18767	0.914559	4.23326	4.63804	2.93996	-0.206134	0.603274	2.70513	2.75023	1.90287	-0.0854535	0.453174	3.45938	4.39983	4.19523	-0.00732473	0.671204	3.93392	4.03238	2.44229	-0.204563	0.187676	2.83095	2.07565	0.32118	-0.486539	0.177563	2.18574	2.40676	2.76369	-0.271751	-0.38108	-0.131111	-0.491886	-0.040596
AT5G22530.1	MSTGCLSCFKVMCFKKKQSKKEAKPVKTEILPEPVGEKEDVERKEGIQAKPLRTEGLPEPVEKKKKDVKYSACKKMPEKCMFKPKPEWISHVGSNDVGPKVGDFYGDHYAETDDSSSSMTNEFNKVKTFDIRGVKLATS	139	5		0.000563	Unknown protein, knockout shows increased sensitivity to Al stress.		-0.412599	0.330541	4.28853	5.18888	2.70133	0.204901	1.05437	5.01529	4.92064	1.82868	-0.29265	0.580704	4.40391	5.3696	3.02258	-0.114551	0.0862363	4.35265	5.34165	4.0908	-0.31027	0.499592	4.4646	3.54282	1.02966	-0.339749	0.15455	3.78263	2.93854	0.986675	0.344734	-0.268541	2.96348	2.08082	1.54337	-0.0488371	0.45078	0.947614	0.563609	0.866794
AT1G56060.1	MAQYHQQHEMKQTMAETQYVTAPPPMGYPVMMKDSPQTVQPPHEGQSKGSGGFLRGW	57	0		0.002865	CYSTM3 is a mitochondrial protein that is induced by salt stress and is a negative regulator of salt stress.	CYSTEINE-RICH TRANSMEMBRANE MODULE 3 (ATHCYSTM3)	0.00625366	1.32907	5.75761	5.17277	2.85703	-0.273146	1.55678	6.02242	3.14742	0.494245	-0.257022	0.821383	4.63385	4.13369	2.11437	0.16499	0.544918	5.81881	4.33984	3.02886	0.384395	1.76567	6.03789	3.00097	1.32252	-0.576367	0.172412	4.6008	1.20624	0.249265	-0.223402	-0.114676	3.8212	0.923738	0.992198	-0.0519307	0.532527	0.130848	0.229548	0.911978
AT1G56060.2	MAQYHQQHEMKQTMAETQYVTAPPPMGYPVMMKDSPQTVQPPHEGQSKGSGGFLRGCLAAMCCCCVLDCVF	71	6		0.002278	CYSTM3 is a mitochondrial protein that is induced by salt stress and is a negative regulator of salt stress.	CYSTEINE-RICH TRANSMEMBRANE MODULE 3 (ATHCYSTM3)	0.00625366	1.32907	5.75761	5.17277	2.85703	-0.273146	1.55678	6.02242	3.14742	0.494245	-0.257022	0.821383	4.63385	4.13369	2.11437	0.16499	0.544918	5.81881	4.33984	3.02886	0.384395	1.76567	6.03789	3.00097	1.32252	-0.576367	0.172412	4.6008	1.20624	0.249265	-0.223402	-0.114676	3.8212	0.923738	0.992198	-0.0519307	0.532527	0.130848	0.229548	0.911978
AT2G25735.1	MMLESSSKKRWNVNVLSSASSHRETIVLGRYSKSCREQKQHQRRERLLPKWKVLLMKLKL3-OH-FARASSTKVVAYEPCDYSLNFDQGPGWHDHDEPENLSRSFSCRFADPTRIRETRFLLY	123	3		0.000531	hypothetical protein;(source:Araport11)		0.880347	2.96676	6.13153	5.1593	4.3714	0.802051	3.15235	6.28723	3.47929	2.04019	0.568213	2.40362	4.81234	3.36663	1.49832	-0.326906	1.15989	4.77527	3.3608	3.40302	1.1117	3.25227	5.44576	2.37922	1.16418	0.115624	1.84464	4.3641	1.02712	0.342675	0.0266252	1.00547	3.56054	0.859143	1.0517	0.219566	0.683629	0.501324	-0.245307	-0.0313077
AT3G15518.1	MQVSRRIPSGEGVEMPGRSETNRIRRRSHGSGLRVRVACTCSGRPGSTKCARHGFVVPSDERLMRKASDGSREVLRRALTPPIRRMNLRWLNFRPTPSRLCKMSSV	106	4		0.000945	hypothetical protein;(source:Araport11)		-0.206915	1.11942	4.94605	5.15279	4.46508	-0.334045	1.52303	5.21135	4.58101	2.07462	0.0440137	1.60765	4.34633	3.81923	2.14337	0.108293	0.444982	4.24423	4.32347	3.60697	0.12343	1.54175	4.394	3.06507	0.988471	0.462937	1.12521	4.09927	1.62942	1.04277	0.246666	0.115493	2.61603	1.93854	1.72266	-0.259982	-0.042287	-0.138433	-0.223342	0.234919
AT4G21920.1	MGNCICVTEKTTTSWSGDDNGSYNKRRRRRRSTVVHDDNDDGEKLLGETSNVTSTSSSSSSERREIKIRITKKELEDLMRNIGLKSLTAEEILSKLIFEGGDQIGFSAVDVTNHHQPWKPVLQSIPEMD	129	2		0.000897	hypothetical protein;(source:Araport11)		0.111779	1.11796	4.90438	5.10377	4.32457	0.422604	1.4597	4.94385	2.78774	0.640953	-0.485012	0.8396	3.55166	3.52195	1.51969	0.263021	0.705188	3.65961	3.15016	2.29043	-0.256303	0.69967	3.6164	1.84189	0.574378	0.205023	0.372721	3.08567	0.318351	0.390044	0.316259	0.618645	2.6157	0.550349	0.580858	-0.226703	0.0186995	0.343218	0.234672	-0.181451
AT3G19615.1	MEGLIPYLIHAIKKDHKPDHQRYRSISVGSSRSYRPLMMGQDGSSSMQGSSHRRTRSDYNPHVIMDKFDQRSSGFGQEFVNKDSSSQKIATKT	93	0		0.000249	beta-1,4-xylosidase;(source:Araport11)		-0.149134	0.0854447	2.5628	5.0188	5.136	-0.476616	0.387723	2.29454	2.27516	1.55124	0.282116	0.460776	1.46763	3.34391	3.3175	-0.340045	-0.391699	0.620669	3.08117	3.68966	-0.115082	0.699472	1.93563	1.71852	1.67881	0.231729	0.666735	1.34762	0.722608	0.610371	-0.690983	-0.341651	-0.521815	-0.284122	-0.200565	-0.00378648	0.572663	0.239056	-0.249795	-0.367784
AT1G58225.2	MKARSSKGGLVAILALVVYCFFENMDGNSIDVPSYEPVGSYSTGGFFAVENKDKMLKSFPSYNEYLKRFNLASVEIWQTVRRKCRDSFISLSIKSLHFFVSKFTQFRYSISTVAPTSVVTLSDMYNVVR	129	2	SP	0.954031	hypothetical protein;(source:Araport11)		0.00574018	0.807366	5.38861	4.98595	2.09095	-1.00433	0.127266	5.02142	3.79687	1.41033	0.592774	0.0600732	3.92033	3.24722	2.14967	0.0232387	0.709102	4.4321	3.84921	2.7669	0.0506709	0.616768	3.81722	2.40367	0.871523	0.272316	-0.321925	2.657	2.99388	1.39986	0.0278108	-0.548403	1.5011	0.844545	-0.217763	-0.416061	-0.412853	-0.201412	-0.633747	-0.0592605
AT1G58225.1	MKARSSKGGLVAILALVVYCFFENMDGNSIDVPSYEPVGSYSTGGFFAVENKDKMLKSFPSYNEYLKRFNLASVEIWQTVRRKCRDSFISLSIKSLHFFVSKFTQFRYSISTVAPTSRSWTSRIIFWVTLTRSVSSMANDTTL	143	2	SP	0.954031	hypothetical protein;(source:Araport11)		0.00574018	0.807366	5.38861	4.98595	2.09095	-1.00433	0.127266	5.02142	3.79687	1.41033	0.592774	0.0600732	3.92033	3.24722	2.14967	0.0232387	0.709102	4.4321	3.84921	2.7669	0.0506709	0.616768	3.81722	2.40367	0.871523	0.272316	-0.321925	2.657	2.99388	1.39986	0.0278108	-0.548403	1.5011	0.844545	-0.217763	-0.416061	-0.412853	-0.201412	-0.633747	-0.0592605
AT3G48630.1	MYNVGTRGSEIRSEVDPAFIANSTFIVTSFTWVMEFQKGRLQNLYWKRDVCAKAGEVQWAVVLGFSWRFPALISTWRFSTRGMKLIILSSILFMVCIQTSRAHLQISSIISSELLVELYLFVCLYHVS	128	3		0.001982	hypothetical protein;(source:Araport11)		-0.442232	0.311362	4.33412	4.97296	3.04857	-0.00915399	0.518477	5.29532	4.28017	0.564408	0.0850864	0.395848	3.96764	3.52045	1.31027	-0.11179	-0.0629289	3.95669	4.40115	3.0142	-0.125154	0.434165	4.31043	2.34014	0.706598	-0.0626245	-0.184549	2.53307	0.574288	0.296001	-0.231036	-0.202314	2.01379	0.784499	1.14217	0.0200669	0.024696	0.383495	0.00899754	0.00446862
AT1G17147.1	MSAGVRSEPMKVVFINTQYVQTDARSFKTIVQELTGKNAVVADGPYEFSGQGYGGKDSSQRFCGVGKEAERGVETTEFDSFFREMPPVGELYNLWSDH	98	1		0.001033	VQ motif-containing protein;(source:Araport11)		0.548632	2.46458	6.33489	4.90257	2.40254	0.625245	2.26873	6.40721	2.33243	-0.672	0.540479	2.24472	5.54365	3.56589	1.37877	0.404144	1.70123	5.75696	4.53251	4.28888	0.418894	2.23901	5.2707	1.43667	-0.0174888	-0.347574	1.26456	4.48053	-0.112577	-0.513775	0.258886	0.944161	4.02261	0.389554	0.626601	0.335162	0.804513	1.1526	-0.514682	-0.387158
AT3G23230.1	MESSNRSSNNQSQDDKQARFRGVRRRPWGKFAAEIRDPSRNGARLWLGTFETAEEAARAYDRAAFNLRGHLAILNFPNEYYPRMDDYSLRPPYASSSSSSSSGSTSTNVSRQNQREVFEFEYLDDKVLEELLDSEERKR	139	0		0.001074	encodes a member of the ERF (ethylene response factor) subfamily B-3 of ERF/AP2 transcription factor family. The protein contains one AP2 domain. There are 18 members in this subfamily including ATERF-1, ATERF-2, AND ATERF-5.	TRANSCRIPTIONAL REGULATOR OF DEFENSE RESPONSE 1 (TDR1)	0.194616	1.74662	6.4808	4.89688	2.27299	-0.195021	1.86859	6.36462	3.02386	-0.326354	0.23706	2.05016	6.31476	4.97817	1.63154	0.364518	1.41454	6.2606	4.66373	2.95708	0.669061	1.37473	5.87342	2.18627	0.385627	0.107374	1.14189	5.19904	0.474712	0.088107	-0.554142	0.142267	4.16795	-0.0539303	-0.873067	-0.371412	-0.0318606	0.150866	-0.931663	-0.820404
AT1G36640.1	MYKLTLCILTLSFLLLSGLSNTVLARVQYESPSQRNKIGKEVWDQTLLRDLKIGASGSNSGRAPSCNNSCKPNRP	75	3	SP	0.994161	transmembrane protein;(source:Araport11)		0.121782	0.248097	3.77385	4.70578	5.28083	-0.183529	0.153796	3.04944	2.67815	1.53167	0.983964	1.47522	3.43063	2.40574	1.54329	0.111474	-0.165549	2.35319	3.30229	2.89826	0.759154	1.81697	3.67958	3.43162	2.54882	-0.193357	0.347316	2.88845	1.45833	0.0252676	-0.294364	-0.420077	1.21577	0.545264	0.782141	0.686005	1.12466	0.0760647	0.426712	0.111965
AT1G68765.1	MAPCRTMMVLLCFVLFLAASSSCVAAARIGATMEMKKNIKRLTFKNSHIFGYLPKGVPIPPSAPSKRHNSFVNSLPH	77	3	SP	0.984611	Encodes a small protein of 77 amino acids. Loss of function mutations are defective in the process of ethylene independent floral organ abscission. Although the mutants have a normal appearing abscission zone, the floral organs do not abscisce. The peptide appears to be secreted and may function as a ligand. Arabidopsis 35S:IDA lines constitutively overexpressing IDA exhibit earlier abscission of…	INFLORESCENCE DEFICIENT IN ABSCISSION (IDA)	0.121645	1.51006	3.06444	4.62769	4.05044	0.25306	1.79069	3.42551	3.53706	2.51731	-0.18614	0.971638	1.05161	1.30616	0.696114	0.246071	0.594699	3.06678	3.2342	2.2684	0.252845	0.745264	2.32483	1.10097	0.363562	0.0756197	-0.000166672	2.08564	0.831174	0.598395	0.155442	0.496043	1.53417	1.416	1.30001	-0.339927	0.206838	-0.19434	-0.0633812	0.248534
AT1G51915.1	MATERFSTMLISVLVLALVLSPILPCQATRAHLDAETRMLRRVCPSCVCCAPAPRGACCPCRCPKNP	67	9	SP	0.998233	cryptdin protein-like protein;(source:Araport11)		-0.0908633	1.15026	3.93371	4.61511	5.03791	-0.121426	1.25525	4.3736	3.59273	2.09792	0.296791	1.1057	3.34812	2.96729	1.22027	-0.00803335	0.680311	3.45279	3.18101	3.39766	0.178624	1.71828	3.75922	3.15136	1.22239	-0.153779	0.802711	2.85356	0.605552	0.420024	-0.403989	0.232556	2.22948	1.44427	2.27648	-0.0347163	-0.392661	-0.352134	-0.5495	-0.293789
AT4G31960.1	MLTGLVVDISMTSTAPTSPSRSESRQLQDPFGEVETKTQNDSVVSNKDKGLLGQKPNDNKTIKELKPKSAVSSYISQRSIPPVQANKTRVDTRKRSVMKGCTDPIITTNRFDCLATCET	119	3		0.00491	hypothetical protein;(source:Araport11)		0.18174	-0.011014	0.559856	4.59933	4.38617	-0.00795358	0.163546	0.240861	3.26444	1.26891	0.059734	-0.0779004	-0.0295395	1.42594	1.23892	-0.0400249	-0.0194363	0.468363	2.13475	1.23995	0.178326	0.0975847	0.385063	1.74579	1.54059	-0.426011	-0.563553	-0.328662	-0.103223	-0.635599	-0.298226	0.711309	-0.544411	0.807192	0.263942	0.17182	0.596145	0.142848	0.321495	0.295383
AT4G08555.1	MYGVGGSSTAGFAEAYAMRKIYKEKMKMKLAEAKVEEEKENVGGKSKIWKTKKSKKTLHTNPRVSSADI	69	0		0.001427	hypothetical protein;(source:Araport11)		0.0430248	1.00139	3.40128	4.55997	4.27269	-0.024241	1.02503	3.50499	2.25649	2.7761	0.24126	0.89545	2.75126	1.55967	2.27664	-0.390519	0.381176	3.0325	1.41054	1.85815	0.165519	1.16773	3.26246	1.90348	2.24115	0.23157	0.358207	3.18056	0.933326	1.05535	-1.05157	0.0163176	1.9428	0.396596	1.63349	-0.306087	-0.078382	-0.00858496	-0.391403	0.549149
AT1G67920.1	MENKTDNGNEDGPIIHSQVEKIKKEFEKIRQPSLQQPEMRRVLSEIKRRQRSRSPLGLGERSISVGN	67	0		0.00043	hypothetical protein;(source:Araport11)		-0.334438	0.0363875	1.31316	4.50925	3.02548	0.191407	0.244092	1.61132	3.30004	0.76345	0.427752	0.639734	1.75184	3.2638	1.71122	0.0428043	0.460997	0.994201	3.45501	1.86547	0.352321	0.329142	1.05592	1.58069	0.715591	0.0601049	0.127956	0.643094	0.530471	-0.123759	-0.00318148	-0.242946	0.481218	0.116705	0.509041	0.446417	0.522401	0.101179	0.457572	0.49808
AT4G23271.1	MSSLRTTVKILNRPPVTFLAHIPCSVVVLLLML	33	1		0.078946	transmembrane protein;(source:Araport11)		0.00706625	0.842844	3.11323	4.44769	3.66423	0.327327	1.33844	3.24313	3.27753	1.94652	-0.203739	0.106424	2.6912	2.69758	1.15014	-0.320662	-0.420386	1.32173	1.86569	1.93152	-0.15066	0.361848	2.13569	2.003	0.635575	-0.0888701	-0.2135	1.58194	1.18547	-0.0715596	0.219205	0.317228	0.979568	1.01341	0.481548	-0.495091	-0.338771	-0.480541	-0.690534	-0.472301
AT2G31335.1	MLAIFVVFLDSTKVEATRMLRITFDSDIRFVFESLQKGTVPGSGPNRCSHIPKGSGSCHG	60	2		0.382882	hypothetical protein;(source:Araport11)	CTNIP3	0.318393	0.433146	2.53703	4.39195	4.61912	0.101321	0.410163	3.30531	5.07008	4.06357	0.0123912	-0.119045	1.64282	1.7658	0.619664	0.172063	0.290105	2.03815	2.33968	0.34276	0.0051011	0.481016	2.51534	3.41099	1.45407	-0.421633	0.306741	0.765959	2.10085	1.20677	0.483464	-0.140104	1.40129	1.7162	1.66438	0.144108	0.0458775	0.0944867	0.2028	0.498323
AT1G22890.1	MAAKTSNLVALLLSLFLLLLSISSQVGLGEAKRNLRNNLRLDCVSHPSPPPPHRSMAPPIFVPPSTSHKGQGP	73	1	SP	0.974398	Secreted peptide which functions in plant growth and pathogen defense.	(STMP2)	0.05469	0.582154	2.29335	4.33871	3.92706	0.268089	0.6205	2.40808	3.21497	1.11946	0.194905	0.37239	1.69125	1.91996	1.2171	0.00261939	0.130939	1.28687	3.46064	3.93601	-0.100312	0.803218	2.01173	1.87356	0.755394	-0.651626	-0.234499	0.647215	0.168205	-0.896047	-0.101761	0.0726452	0.738775	0.591947	0.397561	-0.52589	-0.228724	-0.636219	-0.922203	-1.37005
AT1G15415.1	MASGQDEEFSVRAGQIVGQAHVKENDCNNSSQASGFLQQKGEKVKSMAHDASEAVKNKLGINNDNNEEYKNKNPLDKKNPNNTTSPSMPGHPPSDI	96	1		0.00075	The protein encoded by this gene was identified as a part of pollen proteome by mass spec analysis. It has weak homology to LEA (late embryo abundant) proteins. Encodes protein phosphatase 2A (PP2A) B'gamma subunit. Targeted to nucleus and cytosol.		0.137255	0.0871416	0.344327	4.2376	4.31054	0.538779	0.410042	0.563577	2.59704	2.43547	0.134315	0.18661	0.633967	2.28221	2.90334	-0.447347	-0.308561	0.0466921	3.20051	3.13966	-0.208914	-0.326226	0.238197	2.08799	2.17654	-0.284341	-0.713282	-0.11996	0.420411	0.394262	0.0928844	-0.971076	-0.710432	0.592293	0.828041	0.0514958	0.0625801	-0.388259	-0.528475	0.257646
AT5G27760.2	MAEPKTKVAEIREWIIEHKLRTVGCLWLSGISGSIAYNWSKPAMKTSVRIIHARSYQWLKLLKNLVLISV	70	1		0.00273	Hypoxia-responsive family protein;(source:Araport11)	HYPOXIA-INDUCED GENE DOMAIN 2 (ATHIGD2)	0.0245413	0.218584	1.86821	4.18036	3.30818	0.0334998	0.181609	1.78931	2.7903	1.42043	0.0558998	0.130697	1.50054	2.64201	2.32247	-0.08854	-0.0294529	1.14245	3.52771	2.85156	0.269598	0.434285	1.90084	2.56142	1.80256	0.145506	0.110515	1.10481	1.38181	0.750181	-0.090984	-0.0998887	0.509457	1.15397	1.22776	0.168618	0.266972	0.241063	0.482341	0.750823
AT5G27760.1	MAEPKTKVAEIREWIIEHKLRTVGCLWLSGISGSIAYNWSKPAMKTSVRIIHARLHAQALTLAALAGAAAVEYYDHKSGATDRIPKFLKPDNLNKD	96	1		0.002634	Hypoxia-responsive family protein;(source:Araport11)	HYPOXIA-INDUCED GENE DOMAIN 2 (ATHIGD2)	0.0245413	0.218584	1.86821	4.18036	3.30818	0.0334998	0.181609	1.78931	2.7903	1.42043	0.0558998	0.130697	1.50054	2.64201	2.32247	-0.08854	-0.0294529	1.14245	3.52771	2.85156	0.269598	0.434285	1.90084	2.56142	1.80256	0.145506	0.110515	1.10481	1.38181	0.750181	-0.090984	-0.0998887	0.509457	1.15397	1.22776	0.168618	0.266972	0.241063	0.482341	0.750823
AT5G05300.1	MARIGALILVLFISISQLASFSTARKFPVGIPSVIDGVIFSGEISAVSKKVTVVGCEGEDDHLTAGYSSYITGKFGSLVLNALPKGSVPASGPSKRINDVKT	102	1	SP	0.988569	IDL6 peptide is induced in response to Pathogen-Associated Molecular Patterns (PAMPs). Overexpression of IDL6 results in increased susceptibility to pathogens.	(IDL6)	0.665997	3.63146	7.20239	4.16453	2.73969	0.871439	4.07894	7.42641	2.3575	0.348322	0.193617	2.98012	5.81631	3.47072	1.39075	0.476745	1.60155	6.24146	2.89272	2.92932	0.697393	3.67535	6.08367	1.18443	0.663087	-0.0393921	1.37978	5.11402	1.4008	0.362443	0.134591	0.0175838	4.07718	0.551945	0.828409	0.113498	0.49772	0.64911	0.0201786	0.169475
AT1G24145.1	MAVSIVSSIIFFLLFIILSQYVDGNGFAAQMEHRKLGGPKKTMTMRRNLEENGRQGSKIATPGSTSRHSGQKNIEKEPSKTIYGHQLRPDQIKRGSPCKIYTRCKHSSSLPQPPP3-OH-FASSIDTQGLGH	132	2	SP	0.955894	transmembrane protein;(source:Araport11)		0.0733912	1.61794	5.53474	4.15566	3.70246	0.154704	2.42982	5.76398	3.47529	2.62218	-0.886249	-0.0880256	3.47278	2.91528	1.74036	0.127669	0.505728	4.90327	3.5831	2.34435	0.329469	1.84482	4.87803	3.16421	2.44035	0.343922	0.471613	4.6093	2.72109	1.53823	0.345571	0.723061	3.54486	1.70161	2.03914	-0.0867064	-0.0484657	0.299809	0.0641582	0.340875
AT5G13080.1	MEGYDNGSLYAPFLSLKSHSKPELHQGEEESSKVRSEGCSKSVESSKKKGKKQRYAFQTRSQVDILDDGYRWRKYGQKAVKNNKFPRSYYRCTYGGCNVKKQVQRLTVDQEVVVTTYEGVHSHPIEKSTENFEHILTQMQIYSSF	145	3		0.001362	WRKY75 is one of several transcription factors induced during Pi deprivation. It is nuclear localized and regulated differentially during Pi starvation. RNAi mediated suppression of WRKY75 made the plants more susceptible to Pi stress as indicated by the higher accumulation of anthocyanin during Pi starvation.	WRKY DNA-BINDING PROTEIN 75 (WRKY75)	-0.134167	0.679063	2.04002	4.13722	4.67433	0.21366	1.14775	1.57015	1.84515	1.8893	0.304583	1.08794	2.07509	3.29347	3.46924	-0.24276	2.40858e-05	1.08336	3.03813	3.8569	0.410316	1.26291	1.92035	1.93846	2.1188	0.277744	0.42884	0.929761	-0.0934495	-0.152345	-0.327352	-0.368776	-0.122213	-0.538445	0.459845	0.8045	1.16562	0.238308	-0.212816	0.170859
AT4G28085.1	MGEMIKARRILLFSIVFLFFFSQAFLLCSAEGEHGSRNLAVVMKKRVKYRGPRNTTTSSAASTIMFPGSFHIGAASSLLLALLL	84	1	SP	0.727294	transmembrane protein;(source:Araport11)		-0.0261264	1.20846	4.65522	4.10685	3.49931	0.680293	1.87703	4.88388	2.51966	1.20241	0.40023	1.59989	4.38183	4.43235	2.58577	-0.190874	0.403772	3.22157	3.22576	2.41296	0.432498	1.85252	4.33936	2.19441	1.16974	-0.255088	0.80485	3.21559	0.393918	-0.0549963	0.0298432	0.416169	2.44158	0.516158	0.500583	-0.187502	0.151221	0.256507	-0.097415	-0.044889
AT4G28085.2	MGEMIKARRILLFSIVFLFFFSQAFLLCSAEGEHGSRNLAVVMKKRVKYRGPRNTTTSSAASTIMFPGSFHIGAASSLLLALLL	84	1	SP	0.727294	transmembrane protein;(source:Araport11)		-0.0261264	1.20846	4.65522	4.10685	3.49931	0.680293	1.87703	4.88388	2.51966	1.20241	0.40023	1.59989	4.38183	4.43235	2.58577	-0.190874	0.403772	3.22157	3.22576	2.41296	0.432498	1.85252	4.33936	2.19441	1.16974	-0.255088	0.80485	3.21559	0.393918	-0.0549963	0.0298432	0.416169	2.44158	0.516158	0.500583	-0.187502	0.151221	0.256507	-0.097415	-0.044889
AT3G02242.1	MKKWSYAKLMTSALLLVFLSIILLAFHGGSRGDNHLYDHVAIGTKDILMGRKLKDLKPKTESLKMINPKKKNGFEYSDQVSSDLSRQEVFVDMMARDYQGPKPRSKPLKNN	111	0	SP	0.668278	root meristem growth factor-like protein;(source:Araport11)	GOLVEN 8 (GLV8)	0.112866	0.25902	-0.0736612	4.05234	5.10505	0.177034	0.680514	0.679627	2.70783	3.4486	0.0855664	0.240909	0.280652	1.81858	2.86915	-0.229369	0.106449	-0.426239	2.64122	3.1273	0.450484	0.20287	0.225795	2.78966	2.4482	0.141693	-0.206375	0.0574178	0.884443	0.652686	0.7788	0.723938	0.565707	1.64855	2.51234	0.124509	-0.078985	-0.234687	1.01154	0.397767
AT2G41100.5	MADKLTDDQITEYRESFRLFDKNGDGYITVNELRTTMRSLGETQTKAELQDMINEADADGDGTISFSEFVCVMTGKMIDTQSKKETYRVVNQGQGQVQRHTRNDRAGGTNWERDIAVGVASNIIASPISDFMKDRFKDLFEALLS	145	1		0.000335	encodes a calmodulin-like protein, with six potential calcium binding domains. Calcium binding shown by Ca(2+)-specific shift in electrophoretic mobility. Expression induced by touch and darkness. Expression may also be developmentally controlled. Expression in growing regions of roots, vascular tissue, root/shoot junctions, trichomes, branch points of the shoot, and regions of siliques and flowe…	TOUCH 3 (TCH3)	0.338722	1.4828	3.95384	4.04921	2.57291	0.155975	1.70521	3.96291	3.17201	1.11338	-0.235668	0.915802	3.49154	3.38542	2.05609	0.0248147	0.768878	3.69998	3.6154	2.96389	0.303203	1.82931	4.11335	2.64919	1.50834	0.0737049	0.664649	3.62385	1.98238	1.01365	-0.0871159	0.341146	2.63425	1.58679	1.12289	-0.0162626	0.0936602	0.466546	-0.00192573	0.400649
AT3G02240.1	MEMKKWSYANLITLALLFLFFIILLLAFQGGSRDDDHQHVHVAIRTKDISMGRKLKSLKPINPTKKNGFEYPDQGSHDVQEREVYVELRDYGQRKYKPPVHN	102	0		0.13775	Encodes a root meristem growth factor (RGF). Belongs to a family of functionally redundant homologous peptides that are secreted, tyrosine-sulfated, and expressed mainly in the stem cell area and the innermost layer of central columella cells. RGFs are required for maintenance of the root stem cell niche and transit amplifying cell proliferation. Members of this family include: At5g60810 (RGF1), …	ROOT MERISTEM GROWTH FACTOR 7 (RGF7)	-0.39984	-0.218387	0.479643	4.03794	6.39766	-0.163421	0.0346321	0.721737	3.58748	4.52921	-0.174349	-0.120876	0.335305	1.40987	1.9201	0.001778	0.0940323	0.0966552	2.27899	3.22638	0.555603	0.742919	1.06419	3.1899	2.60213	0.568529	0.104682	0.815183	2.15067	1.1125	-0.1442	-0.398998	-0.20128	1.41179	1.85681	-0.159235	0.168404	-0.363089	-0.149013	-0.504587
AT1G14642.1	MLPCLFSAGSSLSKKLFGSTLMLPPPETRSPCLG	34	2		0.035931	hypothetical protein;(source:Araport11)		0.225133	0.0304744	0.70967	4.02403	1.36919	0.523939	0.147334	0.809087	1.99561	0.146058	-0.278679	0.0235197	0.8152	2.25799	0.899093	-0.668807	0.374084	-0.467664	2.10995	0.452131	-0.0282753	-0.135135	0.385772	0.643102	-0.452748	-0.636698	-0.336032	0.0831779	0.269896	-0.711042	0.302854	0.239131	0.599166	0.672322	-0.303933	0.34661	0.494799	0.156862	0.0949722	0.312113
AT1G50740.1	MHDFCFTIPYGILLIVGGFIGYLKKGSIASLAGGAGTGLLVVLAGFISLKAFEKKKTSLLATLLETVIAAALTFVMGQRFLQTQKIMPAALVAGISALMTCFYVYKIATGGNHIPPKAE	119	2		0.015301	Transmembrane proteins 14C;(source:Araport11)		-0.0696663	0.48084	4.46951	3.98953	1.82549	0.21044	0.626784	4.6071	2.56928	0.695878	-0.0500704	0.591664	4.02199	2.45675	1.1224	-0.164929	0.36713	3.55148	3.12869	1.62521	0.213849	1.00901	4.24939	1.627	0.288113	0.0123413	0.165617	3.12271	0.919158	-0.00310336	0.0293877	0.151583	2.18892	0.605294	0.345701	0.253082	0.302797	0.148326	-0.058139	-0.0476111
AT3G49570.1	MGKGGGYVTVAAEEVEELRRRNGELEREMEEMKKEMVQLWRRTVVAEEAEERLCSQLAELEVESLDQARDYHSRIVFLMDQISRLSSSSLEVVVTNS	97	1		0.000539	response to low sulfur 3;(source:Araport11)	RESPONSE TO LOW SULFUR 3 (LSU3)	-0.486251	-0.0239502	0.569341	3.94898	2.44632	0.0183759	0.0226438	0.00383455	2.05411	1.49421	0.0805433	0.163136	0.573327	2.57862	1.91525	-0.748939	-0.648076	-0.119113	2.56074	2.2879	0.327417	-0.174579	0.928053	2.28571	1.85984	-0.0875476	-0.261662	-0.298173	1.25275	0.0536456	-0.320702	-0.689739	-0.203514	1.71838	0.593357	0.396045	0.119432	0.704771	1.40465	0.811121
AT1G19380.1	MKFDESKTLLPVRKPVNGNRKTAGYKLWVLIAVLLLAFGSMLTGSVSLKGIGLFHSADGVNAFSFGDDLDVLEIEEREKVVRQMWDVYGRSGGVKVPRFWREAFEAAYEFLISDSAAVRNAAVSDIAKLSLVRFVKSESTSAQPNLH	147	0		0.057297	sugar, putative (DUF1195);(source:Araport11)		0.139254	1.06938	3.02121	3.93466	2.80494	0.120003	1.30646	3.2419	3.91214	2.25205	-0.40647	0.454593	2.38407	3.10399	1.68575	-0.267714	0.279767	2.10207	2.75467	1.226	0.369283	1.49503	3.32423	3.33187	1.65594	0.0669758	0.465631	2.10117	2.16608	0.49274	-0.171216	0.12654	1.15415	1.52339	0.792684	-0.241344	0.00367171	0.147928	-0.358367	0.0533532
AT4G36500.1	MQMLRSLSTRTRSRRGGYERVSDDSTFSLLGAKLRRSTSVPYYAPSIKLGAGGVPTILEELPRQKSKKVKPTGKFSHPIFSLFYGKKKKSTTTKPEFSRYLEYLKEGGMWDARANAPVIYYK	122	0		0.000706	hypothetical protein;(source:Araport11)		0.63671	2.25165	5.04031	3.93252	2.76467	0.480514	2.08051	4.72142	1.89596	0.328537	0.336126	1.83134	4.04785	2.66758	1.10254	-0.373622	0.90467	3.87693	2.33195	2.16157	0.728113	2.20292	4.24932	1.42787	0.428814	0.0191324	1.11184	3.52996	0.278312	-0.0723424	-0.111903	0.623979	2.76951	0.246959	0.569906	0.399949	0.737152	0.746893	0.0706838	0.3004
AT4G37290.1	MMMNKNVLSSILFFMLIGSVLVESRPLGLTKTEEKFVASLFDGLSLGSIKDSGPSPGEGHKVVDRKDTFRFVKHSGPSPSGPGH	84	0	SP	0.957314	Encoding a precursor protein of a secreted peptide that is responsive to flg22 stimulus.	PRECURSOR OF PAMP-INDUCED PEPTIDE 2 (PREPIP2)	0.711031	1.77932	4.63616	3.93005	4.26038	0.559106	1.9413	4.62925	2.10227	1.15266	0.4795	1.92785	3.81485	3.51517	3.22045	0.166928	1.08608	4.29089	3.96079	4.9394	0.622523	2.60565	4.40219	1.76258	2.49382	0.0326998	1.48058	3.7389	0.798516	0.985141	-0.426879	-0.081891	2.38974	0.115398	1.22768	-0.17513	0.462583	0.147003	0.105424	0.612651
AT4G28460.1	MRRVSWSTVLIVVVMVSLFFVEHVVVPAAAGRVLTEKSGDGSATMTVEKMKSTVDSWFQRLASGPSPRGRGH	72	0	SP	0.836873	Activates immune responses through RECEPTOR-LIKE KINASE7 (RLK7). Induces stomatal closure is dependent on RLK7 and the transcription of genes involved in SA production and SA-dependent stomatal closure. SA promotes the flg22-induced expression of PIP1 preligand, prePIP1.	PRECURSOR OF PAMP-INDUCED PEPTIDE 1 (PREPIP1)	-0.165493	1.56124	7.14479	3.90466	4.14646	0.100396	2.083	7.11685	1.66441	1.0889	0.489906	1.10353	3.71971	1.62434	1.24294	0.2193	0.667776	5.97736	3.91349	5.01811	-0.274526	1.96227	5.13764	1.40928	1.07419	-0.455699	-0.148984	4.70555	1.01799	0.326846	-0.786899	-1.05775	2.22109	-0.59733	0.634315	0.118272	0.804879	0.169396	0.101266	0.536831
AT5G57510.1	MTKSKDGSLLNRLRQAVNKVKFVLSFKINSLWGLVPMLGSSSSSSSLRLSFNDRPGLTAAFTENEPDSTGSSRGALYRTVSYDQSSDEDIDNKAEMFIANFYRQLKIERQISLELKYCQGNNQSFNYRSP	130	1		0.000967	cotton fiber protein;(source:Araport11)		0.0670005	2.48639	5.10006	3.87132	3.13065	0.326742	2.40501	4.86454	1.08985	0.874908	0.493825	1.43596	2.80482	2.15458	2.22179	-0.178366	0.787694	4.38368	2.63287	2.34106	1.09774	3.12599	4.38532	0.964333	0.332908	0.225042	0.985626	2.83674	0.0868346	-0.146553	-0.0583204	0.104805	2.52099	0.26275	0.0511581	0.418843	0.597691	0.405018	0.0984109	0.00711327
AT1G14870.2	MEAQHLHAKPHAEGEWSTGFCDCFSDCKNCCITFWCPCITFGQVAEIVDRGSTSCGTAGALYALIAVVTGCACIYSCFYRGKMRAQYNIKGDDCTDCLKHFCCELCSLTQQYRELKHRGYDMSLGNLFLRYTVFFLFHFVNN	142	16		0.007579	PCR2 encodes a membrane protein involved in zinc transport and detoxification.	PLANT CADMIUM RESISTANCE 2 (PCR2)	-0.29778	0.44811	2.82384	3.84938	4.27139	0.128422	0.820939	3.15066	2.85619	2.14613	0.267427	0.74606	2.82964	2.88774	2.66804	-0.123747	0.0568582	2.25366	2.91243	2.78586	0.408401	1.31556	3.33787	2.63802	2.09393	0.0538772	0.31253	2.22375	1.34537	0.512461	0.0076451	-0.0338175	1.04328	0.591112	1.07397	0.279093	0.681358	0.204168	-0.236335	-0.0562547
AT2G38870.1	MSTECPRKNSWPELTGTNGDYAAVVIERENPTVNAAVILDGSPVTADFRCDRVRVFVDGNRIVVKTPKSG	70	2		0.001937	Predicted to encode a PR (pathogenesis-related) peptide that belongs to the PR-6 proteinase inhibitor family. Six putative PR-6-type protein encoding genes are found in Arabidopsis: At2g38900, At2g38870, At5g43570, At5g43580, At3g50020 and At3g46860.		-0.222919	0.170453	1.58474	3.84268	4.5686	-0.203055	0.111692	2.08118	3.84756	3.61057	-0.100013	-0.331612	1.08404	1.96426	1.90485	-0.316517	-0.147357	0.933021	2.77212	2.68635	-0.0237702	0.238074	1.83798	2.71831	2.42333	0.0338527	0.0810877	0.998714	1.57161	1.08613	0.0166078	-0.0723253	0.644712	1.32616	1.59322	-0.126321	0.0255229	0.130232	-0.360758	-0.0330197
AT2G36210.1	MLGKRIASFKNLAKKMKSINTTTRSGGEGGSESTYNESLLMNEADEAAMMASKTPTGTFAVYVGEERVKRVVPTSYLNHPLFRMLLDKSHDEFLCFEQKVMLVVPCSLSVFQDVVNAVESCNGNFDFGEFVEEFL	135	3		0.000854	SAUR-like auxin-responsive protein family;(source:Araport11)	SMALL AUXIN UPREGULATED RNA 45 (SAUR45)	0.208147	-0.0714064	1.4739	3.84102	4.74969	0.00422109	0.405722	1.5112	4.09386	2.39615	-0.27015	-0.221115	0.0699242	0.515684	-0.171222	0.224264	0.377206	0.617467	0.978173	0.218573	0.257022	-0.0739996	1.00575	1.73478	0.786622	0.529121	0.520472	0.929478	0.858906	0.61504	-0.0192426	-0.568391	0.592712	0.420124	0.294865	-0.0820972	-0.0352187	-0.506312	-0.0168457	0.0532262
AT5G28610.1	MEKQLYQTMEAAHIERGIDSSPEKEMAKTHKHRGLFHLHHHSKDEKDEDKKKEGSKREKIAAAMVGLGATLKKVKHPRHHGSGGQEEQEGAAEEEEVEEEEEEEEEDDGGDEEEGGKFSAFISMIAEAFEE	131	0		0.000821	LOW protein: ATP-dependent RNA helicase DRS1-like protein;(source:Araport11)		0.312983	2.11515	5.51422	3.82656	2.70383	0.355625	1.70073	5.61825	2.32677	1.45003	0.692315	2.81624	5.38374	4.04509	2.12758	0.273514	0.585574	4.3467	2.74275	2.251	1.26392	3.24866	5.68599	2.21311	1.28868	-0.149524	0.931088	4.20985	0.868141	0.542534	-0.0451704	0.244928	2.60053	0.289378	0.531762	0.0787788	0.435551	0.620094	0.187353	0.194613
AT1G28480.1	MQGTISCARNYNMTTTVGESLRPLSLKTQGNGERVRMVVEENAVIVIGRRGCCMCHVVRRLLLGLGVNPAVLEIDEEREDEVLSELENIGVQGGGGTVKLPAVYVGGRLFGGLDRVMATHISGELVPILKEVGALWL	137	4		0.001842	Encodes GRX480, a member of the glutaredoxin family that regulates protein redox state. GRX480 interacts with TGA factors and suppresses JA-responsive PDF1.2 transcription. GRX480 transcription is SA-inducible and requires NPR1. Maybe involved in SA/JA cross-talk. It has also been shown to interact with the transcription factor TGA2 and suppress ORA59 promoter activity.	(GRX48)	0.119496	1.21915	4.03077	3.80973	3.13157	-0.00937619	0.489121	3.89434	1.33943	1.34643	0.353064	1.44946	3.60136	2.32788	2.53127	-0.194683	0.171134	2.99411	0.889005	1.56929	0.361865	1.3219	3.41282	1.11742	1.31884	-0.15138	0.243917	2.82785	0.827357	0.327013	0.236962	-0.180947	0.872755	0.0345293	0.868725	0.643693	0.712092	1.20389	0.200659	0.910577
AT5G52670.1	MPEKVVFKLEVFEERIKRRAMKVVCDFPGVTLIDVKEKGKLKVNGEFDKFEMTKKLKKVYEFVDIIAVGPDGEPAQNQKLVKKPEPKVKKAPSYRGWNLGFFK	103	1		0.000762	Member of plant specific copper transport protein family.		0.255322	0.784518	4.25856	3.8029	3.35217	0.759984	1.03616	1.75314	1.53687	1.3443	0.605807	1.80771	4.50059	4.43195	3.99989	0.420041	0.671185	1.47419	2.46867	1.29606	0.281618	1.30668	3.68896	2.4648	1.58167	-0.145678	0.652656	1.92028	0.858724	0.472181	0.222295	-0.677704	0.509101	-0.467428	0.139113	0.614317	1.35571	1.36374	0.62381	0.532011
AT2G20562.1	MGDCRPLGFLIGLPFALVALVLALVGAVIWIIGTVLSCLCPCCFCFAALANFAVDLIKLPIKVLRWFTHSIPC	73	7		0.005043	Encodes a putative signalling peptide with similarity to TAX1. No known function has been demonstrated yet.	TAXIMIN 2 (TAX2)	0.0745722	1.41138	4.60019	3.74678	2.94579	0.00321882	1.15682	4.4452	1.21741	0.597834	0.245333	1.00685	3.50551	2.70901	1.21261	0.0353134	0.839626	4.26837	2.64537	2.78905	0.473225	1.60902	4.23449	1.49953	0.809013	0.00680583	0.555943	3.37125	0.480764	0.422045	0.0884532	0.337032	2.81054	0.98597	1.3357	-0.00203092	0.29982	0.457875	0.18894	0.269929
AT1G11925.1	MNTFKISYFIMVLIMVLAIAITFSEPLTVEAKHQHKYGWGIAASARNKGRKHLGATLTCDKSSKVCRLKGSPGRNCCRKKCVDLRTNKLNCGRCGKSCQYSEVCCNGYCVNPMFDRRHCGGCFKKCKKGRSCAYGMCSYA	140	16	SP	0.952683	Encodes a Stigma-specific Stig1 family protein		0.515276	0.273513	1.93773	3.66666	2.56836	-0.248202	0.571808	2.26578	2.98406	0.502842	0.263118	-0.560533	2.13498	4.84481	3.72803	0.0512157	0.185629	0.841877	1.3256	-0.317682	0.457679	0.350176	1.53509	0.781554	0.143552	0.221924	0.330942	0.862741	0.683725	0.466439	0.577947	0.192458	-0.125675	0.710808	0.0913553	-0.304026	0.356046	0.0949582	0.567442	0.163435
AT3G49580.2	MANRGGCVTVAAEEMDELRRRNIELSREEAEEQLCSQLAELEVESLEQARDYHDRMLFLMDQISRLSSSSVVSSS	75	2		0.001138	response to low sulfur 1;(source:Araport11)	RESPONSE TO LOW SULFUR 1 (LSU1)	-0.279363	-0.000691192	0.698012	3.66403	3.38462	0.257859	0.477571	0.657085	1.30783	1.42203	-0.128833	0.102183	0.908194	2.14936	1.2834	-0.415522	0.229946	0.914331	2.78521	3.06149	-0.0986006	-0.19744	0.941102	1.35151	1.06713	-0.464042	-0.387708	-0.167861	0.927828	-0.282011	-0.403851	-0.743486	-0.410749	1.26098	0.879526	0.399515	0.882338	0.28381	1.41017	0.971629
AT3G49580.3	MANRGGCVTVAAEEMDELRRRNIELSREVAEMKTEMIKLWQRTVVAEEAEEQLCSQLAELEVESLEQVLETRRGSKNFEV	80	2		0.000625	response to low sulfur 1;(source:Araport11)	RESPONSE TO LOW SULFUR 1 (LSU1)	-0.279363	-0.000691192	0.698012	3.66403	3.38462	0.257859	0.477571	0.657085	1.30783	1.42203	-0.128833	0.102183	0.908194	2.14936	1.2834	-0.415522	0.229946	0.914331	2.78521	3.06149	-0.0986006	-0.19744	0.941102	1.35151	1.06713	-0.464042	-0.387708	-0.167861	0.927828	-0.282011	-0.403851	-0.743486	-0.410749	1.26098	0.879526	0.399515	0.882338	0.28381	1.41017	0.971629
AT3G49580.1	MANRGGCVTVAAEEMDELRRRNIELSREVAEMKTEMIKLWQRTVVAEEAEEQLCSQLAELEVESLEQARDYHDRMLFLMDQISRLSSSSVVSSS	94	2		0.000562	response to low sulfur 1;(source:Araport11)	RESPONSE TO LOW SULFUR 1 (LSU1)	-0.279363	-0.000691192	0.698012	3.66403	3.38462	0.257859	0.477571	0.657085	1.30783	1.42203	-0.128833	0.102183	0.908194	2.14936	1.2834	-0.415522	0.229946	0.914331	2.78521	3.06149	-0.0986006	-0.19744	0.941102	1.35151	1.06713	-0.464042	-0.387708	-0.167861	0.927828	-0.282011	-0.403851	-0.743486	-0.410749	1.26098	0.879526	0.399515	0.882338	0.28381	1.41017	0.971629
AT5G54490.1	MASPKSSTRPNQENQEPQFQDFFPTMAGKLGGEGLIEEICKGFELLMDKDKGVITFESLRRNASTVLGLGDLTDDDVRYMINEGDFDRDGALNQMEFCVLMFRLSPELMEASRCVVTEVIEEEFYRH	127	3		0.000755	Encodes a PINOID (PID)-binding protein containing putative EF-hand calcium-binding motifs. The interaction is dependent on the presence of calcium. mRNA expression is up-regulated by auxin. Not a phosphorylation target of PID, likely acts upstream of PID to regulate the activity of this protein in response to changes in calcium levels.	PINOID-BINDING PROTEIN 1 (PBP1)	1.02643	2.76598	4.64426	3.66243	3.32998	0.634736	2.39484	4.18172	2.05493	1.03824	0.456084	1.96313	3.5029	2.30553	1.16905	0.223954	1.60577	4.891	2.32827	2.50606	1.60795	2.73982	4.44966	1.6996	0.696902	0.0833156	1.52135	4.18156	0.384466	0.58443	0.346033	0.932625	3.39866	0.602713	0.769019	0.225053	0.201538	0.187278	-0.0475254	-0.0334386
AT3G52520.1	MEAENLMNLSLLQRRNGAVSQTLDLELVSVNKSSEDPLPCYTSLKDI3-OH-FASSTTVDSPAISFAVASAVSGPTITIRNRLVKQAACSYLQPSTPTPSSNPSFLRRVSSSFIRLVSAFFDALLRIFPSPQKIFRA	137	2		0.001595	hypothetical protein;(source:Araport11)		0.354841	1.31742	4.39771	3.65714	2.14305	-0.260229	1.15908	4.36586	1.94691	0.625286	0.176643	1.09409	3.42922	2.77517	1.40661	-0.476282	-0.19919	2.72204	2.45653	1.86557	0.217232	1.43929	3.67625	1.63172	0.506306	-0.165661	0.837377	2.69945	0.200746	-0.169999	-0.286774	0.454399	2.10417	0.520147	0.578278	-0.23086	0.160414	0.342778	0.4218	0.326115
AT3G57450.1	MGKYTEMLDVGVRIAARFHSHCPQTARLYYHPPSDNHHHHGGVKDLIGGGGVLGSGQNSTGLVGGLGTGTGTTGGCGIKSSQVYDDARDLLLFSVV	96	2		0.002999	hypothetical protein;(source:Araport11)		0.422822	1.54732	3.99557	3.63077	3.08863	0.254128	1.49013	4.01178	1.99706	1.31365	0.324203	1.23587	3.14935	2.53141	1.07031	-0.300521	0.606184	3.15488	1.95536	1.82288	0.834222	1.79152	3.79992	1.51135	0.864694	0.159698	0.592074	2.7703	0.372506	0.349821	-0.266431	0.11516	1.96953	0.566645	1.03157	0.00580819	0.0938309	0.228363	0.0746278	0.439414
AT1G35230.1	MASKSVVVFLFLALVASSVVAQAPGPAPTISPLPATPTPSQSPRATAPAPSPSANPPPSAPTTAPPVSQPPTESPPAPPTSTSPSGAPGTNVPSGEAGPAQSPLSGSPNAAAVSRVSLVGTFAGVAVIAALLL	133	0	SP	0.987916	Encodes arabinogalactan-protein (AGP5). The mRNA is cell-to-cell mobile.	ARABINOGALACTAN PROTEIN 5 (AGP5)	-0.185325	-0.394992	2.18095	3.62876	2.89005	-0.568229	0.419746	2.3912	2.40649	1.37149	-0.663685	-0.393893	1.77844	2.26252	2.17983	-0.358871	-0.246583	2.03583	3.2669	2.81018	0.114944	0.279609	2.71231	2.54742	2.56954	-0.38597	-0.125764	1.95877	2.27139	1.01982	-0.211644	-0.161308	0.616243	1.25297	2.50455	-0.446592	0.258435	-0.113979	-0.295421	0.784776
AT1G02440.2	MGTTLGKPFAGFFHQEEARIVLFGLGGTGKSSIMHKFKTGETLTTTMPTVGLNVESVKYKDSNLCFWEMGGQQCYMIQGSVPDNAPVLVYGNKHEVPGAMSASEISNKLDLTSLRKKNWQRNW	123	2		0.003163	A member of ARF GTPase family. A thaliana has 21 members of this family, known to be essential for vesicle coating and uncoating and functions in GTP-binding. Gene encoding ADP-ribosylation factor and similar to other ARFs and ARF-like proteins.	ADP-RIBOSYLATION FACTOR D1A (ARFD1A)	-0.0569383	-0.183692	0.964098	3.6279	4.01119	0.0565339	-0.421729	0.567222	2.99009	1.54834	-0.263078	0.386336	0.83518	0.460819	-0.0225745	0.0528718	-0.399203	-0.41177	0.543938	0.673128	-0.487665	0.265252	0.113756	1.04119	0.720816	-0.297239	-0.468927	-0.206779	1.32336	0.405989	0.294119	-0.3064	1.15912	1.31021	1.59891	0.289873	0.0525254	0.759154	0.210357	0.258876
AT5G28630.1	MEKELHESKVATYTERGIGSHDSSPEKEKEKSHKHRGLFHLHHSKDEKDGDKKKEGSKREKIAAAMVGLGATFMKKKHKGGGKKEKRGGGGGKEEEGGGEEEGEEEEESSSSEEEEEEEEGGGGGGDEEEGGGKFSAFITMIAEAFEE	148	0		0.000687	glycine-rich protein;(source:Araport11)		0.256034	1.69968	4.19207	3.60943	2.40324	0.488569	1.23634	4.05857	2.36619	0.448432	0.620148	2.17842	4.25074	3.0522	1.11921	0.0602016	0.44616	2.53316	1.99687	0.593125	0.813886	2.23419	4.25901	2.26438	0.739167	-0.0245941	1.24456	3.47194	1.46835	0.303469	0.178799	0.520336	2.18703	0.459725	-0.04157	-0.103184	0.360516	0.647394	0.116954	-0.179289
AT1G78410.1	MSGRGKVKSEPMKVVFINTQYVETDARSFKTVVQELTGKNAIVAAGPFDSPSAFDGRCYDGGSKIGEDTRQLHGGGGGGGRMGTTTEFDRLFKEMPHMEELYKLWSEY	108	1		0.000963	VQ motif-containing protein;(source:Araport11)		0.633628	1.52341	4.5901	3.6006	1.89805	0.547216	2.21093	5.40288	2.38513	1.19295	-0.369686	1.31846	4.17145	3.5876	1.77878	0.205809	1.31503	5.27218	3.73687	4.73471	0.441463	1.52592	4.7593	1.95547	1.68201	0.308421	1.27008	4.84207	0.599036	1.19274	-0.492623	0.975232	3.83526	0.365519	2.15437	0.492544	1.09871	1.50883	0.329865	0.918836
AT1G78410.2	MSGRGKVKSEPMKVVFINTQYVETDARSFKTVVQELTGKNAIVAAGPFDSPSAFDGRCYDGGSKIGEDTRQLHGGGGGGGRMGTTTEFDRLFKEMPHMEELYKLWSEY	108	1		0.000963	VQ motif-containing protein;(source:Araport11)		0.633628	1.52341	4.5901	3.6006	1.89805	0.547216	2.21093	5.40288	2.38513	1.19295	-0.369686	1.31846	4.17145	3.5876	1.77878	0.205809	1.31503	5.27218	3.73687	4.73471	0.441463	1.52592	4.7593	1.95547	1.68201	0.308421	1.27008	4.84207	0.599036	1.19274	-0.492623	0.975232	3.83526	0.365519	2.15437	0.492544	1.09871	1.50883	0.329865	0.918836
AT2G23270.1	MMMNKVVLGSFLFFMLVSSNFVVEARPLGLTKAEENLVAKFFDGLSLGAIKESGPSSGGEGHRFVDRTETLEYGKHSGPSTSGPGH	86	0	SP	0.977394	Encoding a precursor protein of a secreted peptide that is responsive to flg22 stimulus. Finetuning role in modulation of immunity through the regulation of SA and JA biosynthesis and signalling pathways.	PRECURSOR OF PAMP-INDUCED PEPTIDE 3 (PREPIP3)	-0.125059	1.12219	4.66914	3.60016	3.83765	-0.100771	1.48337	4.80852	1.16131	1.46688	0.672002	2.22118	3.71712	3.06068	2.37445	-0.059735	9.72623e-05	4.24246	3.50242	4.55638	-0.0335241	1.92823	3.96337	1.26913	1.97613	-0.249914	0.302072	3.76776	-0.138594	0.57794	-0.555919	-0.082942	2.55237	-0.539001	0.675683	0.46693	0.700366	-0.0697945	0.0238771	0.419017
AT5G46295.1	MMRKGKLSIWKTTKERTRLKFLGLGGGLKWKRLNLKMTFLETLRYRIMSIIEAMVLVSKLAFFFLCCGCKF	71	3		0.000684	transmembrane protein;(source:Araport11)		0.515145	2.78958	5.9738	3.59881	3.62858	0.767015	3.19737	6.43286	1.6335	1.0753	1.24824	3.0376	4.90887	3.27384	1.59028	0.0927576	1.74607	5.41012	2.25721	2.62117	1.37451	3.24993	5.37791	1.28031	0.502028	0.202945	1.36397	3.87421	0.259483	-0.517961	0.0260891	1.45157	3.85693	0.851093	1.24011	0.211939	0.614075	0.639847	0.263392	0.964465
AT5G60630.1	MKFDFIIVALVMVSGVALLMVSGEISTEEISPAIEHSSSLPQSETEMSPSPTMSNDYDYPSSSQLTESNDLNYTDSTRPGGEEASVGGENGGGGGKKTGIAVVGSIAAASMVGFGGYVLKKRRENIRRSRYGYASTEFF	139	0	SP	0.90223	transmembrane protein;(source:Araport11)		0.160704	0.116764	0.538477	3.52069	5.21555	-0.0951728	-0.297993	0.204995	2.87255	2.91612	-0.517279	0.0334388	0.188491	2.13264	2.29438	0.0042028	0.294382	0.476385	2.57009	3.72204	0.20313	-0.263741	0.246479	2.22551	1.28188	0.105768	0.0664717	0.531662	1.12636	0.862587	0.297642	0.230964	0.424666	1.21953	1.53962	0.102433	-0.243283	0.0391796	0.0548055	-0.144815
AT3G50900.1	MFRAMSTRKIHGGYEKLGDEEARLKRVSSVPASVYGHSRNPVQEVKKTPTAKPTGGSVHPLFSFFDVHFQRKKKNTAKKKSLATAKPEFARYMEYVREGGVWDPSSNAPVIHYR	114	0		0.002248	hypothetical protein;(source:Araport11)		0.0324624	0.421516	1.73701	3.46126	2.87728	0.453635	0.590769	2.10576	3.37795	1.5796	0.279372	0.614441	1.55382	1.99757	1.1271	-0.248569	-0.0520182	0.922003	2.59646	1.78125	0.24794	0.659774	2.06305	2.45819	1.21886	-0.221295	0.116998	1.22035	1.3798	0.0627658	-0.108279	0.132849	1.08876	1.10713	0.69204	0.172745	0.587909	0.690476	0.168265	0.440548
AT3G59880.1	MDGLIPMAFKAMRKNRTRKRYECLSSSAGTTKDSYDDSDFFPFAAKSDHSVVSRPSSSFDHIEMNNVDVQQRHHRGWSVGDFSSMSCREGKRSGVDGGDIGFSPSRRGQLVRNRSHRLFSCVSGE	125	3		0.000391	hypothetical protein;(source:Araport11)		0.144727	0.411911	1.38047	3.38448	3.42025	-0.18632	0.687087	2.17999	3.81422	2.30018	-0.482179	0.199351	2.12349	3.08617	1.75215	-0.29717	-0.170452	1.25154	2.89379	1.75209	-0.308385	0.253288	2.13206	3.20798	1.40452	0.0687078	0.479261	1.87124	2.10284	0.767702	-0.0775931	0.294969	1.05175	1.73905	1.40608	-0.334685	-0.258786	0.130923	0.0682276	0.201101
AT5G22270.1	MNQEAASNLGLDLKLNISPSLDSSLLTESSSSSLCSEEAEGGGGEAKSMVVVGCPNCIMYIITSLENDPRCPRCNSHVLLDFLTGNHSKKSTS	93	5		0.001281	hypothetical protein;(source:Araport11)	SALT-INDUCED AND EIN3/EIL1-DEPENDENT 1 (SIED1)	0.126802	0.584581	0.915761	3.38439	4.33554	-0.10296	0.443759	0.914895	1.69659	1.82175	0.16281	0.146548	0.593721	0.756726	1.01903	-0.266636	-0.0353634	0.244467	1.62898	2.14655	0.15284	0.475986	0.360963	1.224	0.869303	-0.15608	0.0758972	0.18363	-0.599888	-0.46905	-0.152884	0.0435406	0.234935	-0.217423	0.702587	-0.0170928	0.248113	0.10586	-0.136212	0.118106
AT1G05340.1	MSQYDHNQSAGANPPPPMSTCTSPPPPIGYPTNQPSHGSVAQGKVETKSKGDGFFKGCLAAMCCCCALDICF	72	7		0.003351	cysteine-rich TM module stress tolerance protein;(source:Araport11)	CYSTEINE-RICH TRANSMEMBRANE MODULE 1 (ATHCYSTM1)	-0.049528	0.266996	3.13104	3.37908	2.6016	0.302936	0.701957	3.40055	1.91165	0.685068	0.979878	0.448899	2.63092	1.78372	1.63184	0.345229	0.752742	2.60014	2.33795	1.83134	0.115588	1.17168	3.56095	2.68408	1.73038	-0.00588833	0.242385	1.46392	0.506812	0.0145247	-0.147199	-0.187443	0.845433	-0.455736	-0.0723224	-0.371157	0.0592031	-0.387799	-0.358096	-0.551722
AT3G26980.1	MPEEDLVELKFRLYDGSDVGPFQYSPTATVSMLKERIVSEWPKDKKIVPKSASDIKLINAGKILENGKTVAQCKAPFDDLPKSVITMHVVVQLSPTKARPEKKIEKEEAPQRSFCSCTIM	120	3		0.000447	membrane-anchored ubiquitin-fold protein 4 precursor;(source:Araport11)	MEMBRANE-ANCHORED UBIQUITIN-FOLD PROTEIN 4 PRECURSOR (MUB4)	0.0968722	0.382871	3.4471	3.34278	1.76467	0.0345575	0.461606	3.56761	2.75684	0.299547	-0.142331	0.301973	3.08943	2.51599	0.866394	-0.0291138	0.149235	2.45443	2.86315	2.14111	0.17205	0.720237	3.47978	2.1878	0.424126	0.059749	0.0502069	2.23761	1.056	0.147483	-0.0544305	0.0684961	1.42646	0.775605	0.624683	-0.226603	-0.0926493	0.11039	0.052352	0.338333
AT3G29034.1	MVRERRKTEKVEEKREQEVVDQEEKVKPRQRSVSRRNMQSLVIGLVGGALTLGAYSQTYVDPGKSIGAGLFVLFFGLLVSEGFISL	86	0		0.002793	transmembrane protein;(source:Araport11)		-0.12535	0.158202	1.55883	3.3376	3.9338	-0.125785	0.120174	1.66023	3.1051	2.92817	0.0135594	0.083132	1.09747	2.086	1.7448	-0.428715	-0.0797715	0.756924	2.09206	2.15277	0.277692	0.35631	1.35664	2.50665	1.77545	0.0179244	0.223015	1.04195	1.56318	0.760997	-0.37538	-0.118455	0.226975	0.961224	1.12026	-0.192941	0.237577	-0.0167229	-0.0596596	0.171227
AT2G23680.2	MILDQTKWKYSNNIMASLLAPYLFSSLPIVIFQVLRNGVGKWIALLTVILRLFLPNHFHESLEIPGATILLIVVTPSDIGAIFRDDLRYTGGDVCLLTSFYLINKHTKACGGIKNSFTQKDKVTYSICLWILFVYPILSSFAALFYL	147	3		0.001531	Cold acclimation protein WCOR413 family;(source:Araport11)		0.275294	0.842291	3.46956	3.32053	2.79464	-0.0610721	0.898472	3.20244	2.47192	1.62369	-0.371823	0.165038	2.37362	2.25005	1.56912	-0.2749	0.146563	2.88832	2.59675	2.14534	0.10789	0.90429	3.19948	2.27735	1.41903	-0.121461	0.257465	2.78691	1.946	1.13467	-0.173064	-0.174736	1.81511	1.34029	1.27998	-0.048053	0.127234	0.118446	0.0882411	0.683288
AT1G05575.1	MEGSFEGMLMKVSIFALIQGLVYLILSKSSSVFSTSKTMKRAYSFRSARSISIRRILAVLQDMPAGGEMSPSAMGPSLASSLSSPSEII	89	0		0.006575	transmembrane protein;(source:Araport11)	HYPOXIA RESPONSE UNKNOWN PROTEIN 17 (HUP17)	0.490731	2.8052	6.04703	3.30678	1.8771	0.931638	3.17681	6.38544	2.06289	0.554133	1.18837	3.26497	5.46479	3.09264	1.30095	0.380455	1.73266	5.53401	2.29659	1.62167	1.41155	3.21394	5.27537	1.2501	0.328229	0.0237919	1.66399	4.47492	-0.134825	-0.379151	0.138875	0.973833	3.8105	-0.00459737	0.216443	0.390019	1.1735	0.788812	0.0325381	-0.011421
AT5G03210.1	MCFFDNRCDQNLTVVVDVAWWMEAVPPQIISPAKPSVSPILETILEGGETEEDNQEQENEDV	62	2		0.001131	Encodes a small polypeptide contributing to resistance to potyvirus.	DBP-INTERACTING PROTEIN 2 (DIP2)	0.0691451	2.66987	5.99558	3.27647	2.86665	0.047505	2.54484	5.09492	3.1302	0.938607	-0.141663	1.66496	3.79266	2.65033	1.05733	0.402403	0.634705	4.82266	2.96925	1.03788	1.18423	2.82155	4.88265	2.4299	1.36607	-0.124918	-0.0573864	2.88837	1.74045	0.982569	0.189539	0.511711	1.89128	0.806158	1.15344	0.249469	0.178104	0.255065	0.798194	0.19219
AT5G03210.2	MNTYQFNSKSNNLNYFRKSKIISSEANMCFFDNRCDQNLTVVVDVAWWMEAVPPQIISPAKPSVSPILETILEGGETEEDNQEQENEDV	89	2		0.000629	Encodes a small polypeptide contributing to resistance to potyvirus.	DBP-INTERACTING PROTEIN 2 (DIP2)	0.0691451	2.66987	5.99558	3.27647	2.86665	0.047505	2.54484	5.09492	3.1302	0.938607	-0.141663	1.66496	3.79266	2.65033	1.05733	0.402403	0.634705	4.82266	2.96925	1.03788	1.18423	2.82155	4.88265	2.4299	1.36607	-0.124918	-0.0573864	2.88837	1.74045	0.982569	0.189539	0.511711	1.89128	0.806158	1.15344	0.249469	0.178104	0.255065	0.798194	0.19219
AT2G41280.1	MGNLMSLVLVALLFSLSLAVIADTSNDATHVKEEVKPSTEATDAIEAEVEVNDAVVEPQQGLPGGGCRFGCCGGYWWNGLCIYCCRSQAEANEVVKTVEPQKEEAKP	107	6	SP	0.994278	Encodes a hydrophilic protein similar to Late Embryogenesis Activated (LEA) proteins expressed during embryogenesis, which are thought to be involved in the acquisition of desiccation tolerance.	(M1)	0.358677	0.820067	2.92567	3.25012	2.98614	-0.0153578	0.707022	2.41447	2.14939	0.946021	0.183736	-0.00645831	2.08005	1.84451	1.73608	-0.553876	-0.136044	1.689	2.071	1.89363	-0.193348	0.00532221	2.03096	1.53853	1.30099	-0.535933	0.135271	1.10583	1.26523	1.01633	-0.289695	0.217198	0.508147	1.13359	0.452355	0.602116	0.421451	0.474804	-0.108569	0.579015
AT3G21351.1	MKTGSARSTILLYVLFLALVLSPTLPCQAASVPLGGRKMMAPPPPILMCTQCACCAPAPPGSCCRCGCSGGP	72	9	SP	0.999603	transmembrane protein;(source:Araport11)		-0.00760306	0.0215941	0.281774	3.20858	3.5895	-0.0211279	-0.351097	0.602318	3.39054	3.52607	-0.107859	-0.124793	-0.0596979	0.776576	0.222541	-0.287562	-0.171267	-0.0333415	0.448209	-0.599763	0.186066	0.256668	0.280272	2.11257	1.8432	-0.0191655	0.0296721	0.0970622	0.57544	0.489227	0.280488	0.306569	0.259188	1.10236	1.41524	0.104698	0.503292	-0.120819	-0.346927	-0.316408
AT4G01535.1	MVNGSFGMKLMLIESLNLLKNTTVLEDQGKWNCEFGSKLWLCTRSVKDKITGVAREVTPELQYKTQCDAIRYKWGLATLDGLHSDFDSTENFIGFIELGPDLRNRTVEPDTHPTSLRAGDGSYKVITNASEFHFLPP	137	3		0.002799	hypothetical protein;(source:Araport11)		0.43304	2.43634	4.53804	3.19799	3.19993	0.224542	2.11306	2.55087	0.823463	2.39743	-0.205057	1.33868	2.25212	1.16033	1.14339	0.172108	0.157257	1.89321	0.444958	1.22463	-0.575425	2.73688	1.61936	-0.164182	0.296239	-0.206418	0.0433301	0.502049	0.425746	0.371856	0.261072	0.282948	0.397976	0.754499	0.761392	-0.0970445	0.0326757	0.00759575	0.457316	0.473336
AT5G44585.1	MRNTISSKMGQVLIVLLLLCTVLCRTESA3-OH-FAGQHSVLLTGRRLMGSGASGPVRSSQSSQAGGRFNDADPIAIDYGKY	82	2	SP	0.972881	Precursor of serine-rich endogenous peptide which regulates defense response and root elongation. Has properties of phytocytokines, activates the phospholipid signaling pathway, regulates reactive oxygen species response, and is perceived in a BAK1 co-receptor-dependent manner.	PRECURSOR OF SERINE-RICH ENDOGENOUS PEPTIDE 12 (PROSCOOP12)	0.18853	0.7306	2.89337	3.19523	4.52549	-0.446409	0.669538	3.16198	3.25509	2.7398	-0.340536	-0.103207	2.72045	2.63251	1.59738	-0.188692	0.116211	2.74785	1.99108	1.1087	-0.109255	0.756236	3.14504	2.78418	1.84512	0.459484	0.520613	3.72063	2.95984	1.61814	-0.476152	0.0311809	2.10533	1.61637	1.17367	-0.347918	-0.105026	0.219382	-0.187201	0.308443
AT1G02450.1	MYPKQFSLYNYSLETMSKDENVESKETIRVDKRVREDEEEEEEKKIDTFFKLIKHYQEARKRRREELAENSGVVRRKSNGGERSGIVVPAFQPEDFSQCRTGLKPPLMFVSDHKEENTKVEQEEDQTEERNEDKALDLNLAL	142	1		0.000275	NIMIN1 modulates PR gene expression according the following model: NPR1 forms a ternary complex with NIMIN1 and TGA factors upon SAR induction that binds to a positive regulatory cis-element of the PR-1 promoter, termed LS7. This leads to PR-1 gene induction. NIMIN1 decreases transcriptional activation, possibly through its EAR motif, which results in fine-tuning of PR-1 gene expression.	NIM1-INTERACTING 1 (NIMIN1)	0.658397	0.217052	1.17144	3.17601	4.51816	-0.111706	0.602395	1.44533	1.69535	2.78921	0.139808	0.242725	2.06466	0.346649	1.45306	0.0182586	-0.137524	1.08902	0.512756	1.08586	0.190629	0.36185	1.99726	1.16282	2.06362	0.607091	0.318048	1.76501	1.00504	0.900238	0.361036	0.238066	1.22999	0.577724	1.45647	-0.250825	-0.417146	-0.113374	-0.270833	0.701844
AT5G40180.1	MNFIGDSVARNHMESLLCLLSMEETPKDIYLMAKFLVAGLERTHAKKTGTGIYDLDIDKRAMGN	64	1		0.002512	Pmr5/Cas1p GDSL/SGNH-like acyl-esterase family protein;(source:Araport11)		0.0270278	0.309554	2.74092	3.17264	1.7766	-0.115495	0.669843	3.75161	1.52249	0.478888	-0.06791	0.848597	2.45717	1.76525	0.69079	-0.322488	-0.155926	1.58448	1.98594	1.56394	0.320871	0.657771	2.43666	1.16928	-0.0278452	-0.332725	0.462951	1.0059	0.0809869	-0.330742	0.0863152	0.760475	1.23654	0.0976032	-0.212046	-0.181754	0.236336	-0.457253	0.0260125	-0.198295
AT5G10695.2	MCLVFVCDQDERVIGRFCFVPLSNKSKRRHLCSTCGKRLIVHG	43	5		0.004703	methionyl-tRNA synthetase;(source:Araport11)		0.196682	1.65644	4.31215	3.11881	2.20851	0.327059	1.75054	4.26334	2.7613	0.997994	0.266211	1.23926	3.23465	1.88319	1.28551	-0.185038	0.70049	3.00696	2.00872	1.01599	0.845225	2.45731	4.28339	1.70301	0.788787	-0.269804	0.414746	1.72225	0.468639	-0.0835305	-0.183937	0.223463	1.40498	0.30598	0.302372	-0.230908	0.539749	0.204454	-0.0889815	-0.115476
AT5G10695.1	MCLVFVCDQDERVIGRYAAPGACPYCGGAVQVVDVNSQWRFCFVPLSNKSKRRHLCSTCGKRLIVHG	67	7		0.004517	methionyl-tRNA synthetase;(source:Araport11)		0.196682	1.65644	4.31215	3.11881	2.20851	0.327059	1.75054	4.26334	2.7613	0.997994	0.266211	1.23926	3.23465	1.88319	1.28551	-0.185038	0.70049	3.00696	2.00872	1.01599	0.845225	2.45731	4.28339	1.70301	0.788787	-0.269804	0.414746	1.72225	0.468639	-0.0835305	-0.183937	0.223463	1.40498	0.30598	0.302372	-0.230908	0.539749	0.204454	-0.0889815	-0.115476
AT4G15610.2	MNCLFTCGSSWNFETKVVESQKYFVVALSVACFYSIVSTFVTVSAFKKHSCSAVLLLNLAIMDAVMVGIVASATGAGGGVAYLGLKGNKEVRWGKICHIYDKFCRHVGGAIAVSLFASVVLLLLSIISVLSLYKKIR	137	6		0.001593	Uncharacterized protein family (UPF0497);(source:Araport11)	CASP-LIKE PROTEIN 1D1 (CASPL1D1)	-0.518297	-0.340884	0.361955	3.11684	3.33896	0.00348125	0.228416	0.449406	2.55584	1.82348	0.262609	0.0811508	0.666235	1.75747	1.82313	-0.26893	-0.218396	0.319899	2.30163	2.08063	0.0217625	0.0925341	0.513084	2.28444	1.6334	0.0634044	-0.142859	0.0505968	0.281453	-0.299771	0.00181951	-0.0722688	-0.362048	0.33116	0.438455	0.0225975	0.195265	-0.0636367	-0.614142	-0.512713
AT2G32210.2	MSQYSQNQSSGAYPTPPVSTGPYVAPPPLGYPTNDTSHATVATVETKSKGDGFLKGWLVFFF	62	0		0.007625	cysteine-rich/transmembrane domain A-like protein;(source:Araport11)	CYSTEINE-RICH TRANSMEMBRANE MODULE 6 (ATHCYSTM6)	0.427148	1.97172	5.27584	3.05034	2.27148	-0.0584012	1.71075	5.19771	0.85218	0.993502	0.383861	1.43654	4.01752	2.1266	1.44741	0.287542	0.729709	4.40172	1.74339	0.955615	0.713276	2.33799	5.33294	1.43599	1.67243	-0.104405	1.02977	3.51899	0.47191	0.37066	-0.015015	0.317148	2.66101	0.419521	1.33794	-0.0484342	0.432419	0.521392	-0.0339484	0.37909
AT2G32210.3	MSQYSQNQSSGAYPTPPVSTGPYVAPPPLGYPTNDTSHATVATVETKSKGDGFLKGWLVFFF	62	0		0.007625	cysteine-rich/transmembrane domain A-like protein;(source:Araport11)	CYSTEINE-RICH TRANSMEMBRANE MODULE 6 (ATHCYSTM6)	0.427148	1.97172	5.27584	3.05034	2.27148	-0.0584012	1.71075	5.19771	0.85218	0.993502	0.383861	1.43654	4.01752	2.1266	1.44741	0.287542	0.729709	4.40172	1.74339	0.955615	0.713276	2.33799	5.33294	1.43599	1.67243	-0.104405	1.02977	3.51899	0.47191	0.37066	-0.015015	0.317148	2.66101	0.419521	1.33794	-0.0484342	0.432419	0.521392	-0.0339484	0.37909
AT1G06135.1	MKRQVMIFVMLVAFFVVFLDVKQVEAMRPFPTAADEIRFVFQALQRGPVSGSGPNGCTNIPRGTPRCHG	69	2		0.9904	transmembrane protein;(source:Araport11)	CTNIP1	-0.106333	0.330126	4.86221	1.32294	0.642609	-0.0827829	0.335595	4.68669	0.177891	0.0802148	-0.0453559	0.399821	2.72519	0.469682	0.247203	0.106174	0.225074	4.0875	1.35923	1.17441	-0.099191	1.07779	3.64286	0.332828	0.0314556	0.00501159	-0.0501242	1.80333	-0.0998064	-0.0840388	0.0259927	-0.0695948	2.13895	-0.0137942	0.145311	0.00556065	0.0766471	-0.00255633	0.00491116	0.0644513
AT1G06137.1	MKKQLILGVILLGLFVIFLNTTQVEAARPLQADSEIRFVFQLLQRGQVIGSGPNGCTNIPGGSGTCRP	68	2		0.9946	transmembrane protein;(source:Araport11)	CTNIP2	-0.00564649	0.00801565	0.488953	0.0295025	0.0141178	-6.39469e-06	0.00283422	0.415393	0.0162248	2.12932e-05	3.16863e-05	-0.00311982	0.0601203	-0.00286442	-0.00243926	0.00565099	0.00565523	0.314392	0.0578126	0.0679879	-0.00563079	-0.000210331	0.177563	0.00544888	-0.00562233	-0.00566884	-0.00565846	0.0525758	-0.00563657	-0.00559738	0.00563829	0.00244649	0.0397472	-2.93523e-06	7.30342e-06	1.14041e-05	1.82069e-05	-6.87841e-06	1.18614e-05	0.00245295
