# Supplementary material for: Perception of a conserved family of plant signalling peptides by the receptor kinase HSL3
Source: eLife. 2022 May 26;11:e74687. doi: 10.7554/eLife.74687 (PMC9191895; doi:10.7554/eLife.74687)
Supplement: Supplementary file 2. [file elife-74687-supp2.xlsx]

## Sheet: 95%_2_pep
Results for total spectrum count
Peptide threshold set at 95%
Protein threshold set at 99%
Minimum peptides set at 2
0.06% decoy FDR
			Rep 1		Rep 2		Rep 3		Rep 4		Spectral count				Ratio
Accession Number	Bio View: Identified Proteins (1178)<BR>Including 0 Decoys	Molecular Weight	Mock	CTNIP4	Mock	CTNIP4	Mock	CTNIP4	Mock	CTNIP4	Count mock	Count CTNIP4	Sum mock	Sum CTNIP4	CTNIP4/mock
Above are unique to CTNIP4 treatment; below present also in mock, ratio of counts for CTNIP4/mock in column P ranked high-to-low, 2-fold higher/lower differentials are highlighted
AT5G25930.1	| kinase family with leucine-rich repeat domain-containing protein (HSL3) | Chr5:9050880-9053978 FORWARD LENGTH=1005 | 201606	112 kDa				5		5	1	7	1	3	1	17	17
AT3G13930.1	| Dihydrolipoamide acetyltransferase%2C long form protein | Chr3:4596240-4600143 FORWARD LENGTH=539 | 201606	58 kDa		3		2	1	5		1	1	4	1	11	11
AT1G58080.1	| ATP phosphoribosyl transferase 1 | Chr1:21504562-21507429 REVERSE LENGTH=411 | 201606	45 kDa				2		1	1	3	1	3	1	6	6
AT5G53650.1	| ABC transporter A family protein | Chr5:21791265-21792242 FORWARD LENGTH=72 | 201606	8 kDa		2	1	3				1	1	3	1	6	6
AT1G01750.2	| actin depolymerizing factor 11 | Chr1:275614-276126 FORWARD LENGTH=145 | 201606	17 kDa				5	2	5			1	2	2	10	5
AT1G12350.1	| 4-phospho-panto-thenoylcysteine synthetase | Chr1:4198870-4200633 FORWARD LENGTH=317 | 201606	35 kDa				2	2	4		4	1	3	2	10	5
AT3G25230.1	| rotamase FKBP 1 | Chr3:9188257-9191137 FORWARD LENGTH=551 | 201606	61 kDa				3		1	1	1	1	3	1	5	5
AT5G62200.1	| Embryo-specific protein 3%2C (ATS3) | Chr5:24984463-24985674 REVERSE LENGTH=190 | 201606	21 kDa	1	5							1	1	1	5	5
AT1G45474.1	| photosystem I light harvesting complex protein 5 | Chr1:17179353-17180439 FORWARD LENGTH=256 | 201606	28 kDa	1	3				1			1	2	1	4	4
AT1G53670.1	| methionine sulfoxide reductase B 1 | Chr1:20036687-20038074 FORWARD LENGTH=202 | 201606	23 kDa	1	4							1	1	1	4	4
AT2G43030.1	| Ribosomal protein L3 family protein | Chr2:17894898-17895713 FORWARD LENGTH=271 | 201606	29 kDa	1	4							1	1	1	4	4
AT4G14930.1	| Survival protein SurE-like phosphatase/nucleotidase | Chr4:8538831-8541205 FORWARD LENGTH=315 | 201606	34 kDa				1	1	3			1	2	1	4	4
AT4G36750.1	| Quinone reductase family protein | Chr4:17324642-17326215 FORWARD LENGTH=273 | 201606	29 kDa			2	6		2			1	2	2	8	4
ATCG00900.1	| Ribosomal protein S7p/S5e family protein | ChrC:97478-97945 REVERSE LENGTH=155 | 201606	17 kDa	1	4							1	1	1	4	4
AT3G15890.1	| Protein kinase superfamily protein | Chr3:5374389-5376114 FORWARD LENGTH=361 | 201606	41 kDa	3	4		2		3		2	1	4	3	11	3.66667
AT1G51710.1	| ubiquitin-specific protease 6 | Chr1:19175805-19179894 REVERSE LENGTH=482 | 201606	54 kDa			2	2				5	1	2	2	7	3.5
AT5G57110.1	| autoinhibited Ca2+ -ATPase%2C isoform 8 | Chr5:23109729-23116857 REVERSE LENGTH=1074 | 201606	116 kDa	2	7							1	1	2	7	3.5
AT1G04510.1	| MOS4-associated complex 3A | Chr1:1226749-1230592 FORWARD LENGTH=523 | 201606	57 kDa					1	3			1	1	1	3	3
AT2G27530.1	| Ribosomal protein L1p/L10e family | Chr2:11763443-11764570 REVERSE LENGTH=216 | 201606	24 kDa	1	3							1	1	1	3	3
AT2G27600.1	| AAA-type ATPase family protein | Chr2:11781226-11783730 FORWARD LENGTH=435 | 201606	49 kDa						2	1	1	1	2	1	3	3
AT3G18490.1	| Eukaryotic aspartyl protease family protein | Chr3:6349090-6350592 REVERSE LENGTH=500 | 201606	53 kDa	1	3							1	1	1	3	3
AT3G54640.1	| tryptophan synthase alpha chain | Chr3:20223331-20225303 REVERSE LENGTH=312 | 201606	33 kDa				2		3	2	1	1	3	2	6	3
AT4G04950.1	| thioredoxin family protein | Chr4:2517882-2519924 REVERSE LENGTH=488 | 201606	53 kDa				3	2	3			1	2	2	6	3
AT5G17560.1	| BolA-like family protein | Chr5:5788474-5789671 FORWARD LENGTH=177 | 201606	20 kDa				3	2	3			1	2	2	6	3
AT5G43960.1	| Nuclear transport factor 2 (NTF2) family protein with RNA binding (RRM-RBD-RNP motifs) domain-containing protein | Chr5:17689154-17691653 REVERSE LENGTH=450 | 201606	50 kDa				1	2	2		3	1	3	2	6	3
AT5G60600.1	| 4-hydroxy-3-methylbut-2-enyl diphosphate synthase | Chr5:24359447-24363274 FORWARD LENGTH=741 | 201606	82 kDa						3	1		1	1	1	3	3
AT5G01220.1	| sulfoquinovosyldiacylglycerol 2 | Chr5:86907-89885 REVERSE LENGTH=510 | 201606	57 kDa	1	1				5	2	2	2	3	3	8	2.66667
AT1G14610.1	| valyl-tRNA synthetase / valine-tRNA ligase (VALRS) | Chr1:5008502-5014486 REVERSE LENGTH=1108 | 201606	126 kDa			2	6	2	3	1	4	3	3	5	13	2.6
AT1G09795.1	| ATP phosphoribosyl transferase 2 | Chr1:3173588-3176690 FORWARD LENGTH=413 | 201606	45 kDa				2	2	3			1	2	2	5	2.5
AT1G63660.1	| GMP synthase (glutamine-hydrolyzing)%2C putative / glutamine amidotransferase | Chr1:23604127-23607080 REVERSE LENGTH=534 | 201606	59 kDa				3		2	2		1	2	2	5	2.5
AT4G01610.1	| Cysteine proteinases superfamily protein | Chr4:694857-696937 FORWARD LENGTH=359 | 201606	39 kDa		1	2	4		4	2	1	2	4	4	10	2.5
AT4G26970.1	| aconitase 2 | Chr4:13543077-13548427 FORWARD LENGTH=995 | 201606	108 kDa			1	3	1	2			2	2	2	5	2.5
AT5G36210.1	| alpha/beta-Hydrolases superfamily protein | Chr5:14248202-14253272 REVERSE LENGTH=730 | 201606	81 kDa			1	2		1	1	2	2	3	2	5	2.5
ATCG00500.1	| acetyl-CoA carboxylase carboxyl transferase subunit beta | ChrC:57075-58541 FORWARD LENGTH=488 | 201606	56 kDa	1	3		3	2	1	1	3	3	4	4	10	2.5
AT3G02880.1	| Leucine-rich repeat protein kinase family protein | Chr3:634819-636982 FORWARD LENGTH=627 | 201606	68 kDa	2	2		3	1	1		1	2	4	3	7	2.33333
AT3G05840.1	| Protein kinase superfamily protein | Chr3:1740793-1742927 FORWARD LENGTH=409 | 201606	47 kDa			2	2		3	1	2	2	3	3	7	2.33333
AT5G04260.1	| WCRKC thioredoxin 2 | Chr5:1178901-1180022 REVERSE LENGTH=192 | 201606	22 kDa			1	2	2	4		1	2	3	3	7	2.33333
AT5G52810.1	| NAD(P)-binding Rossmann-fold superfamily protein | Chr5:21399524-21400501 FORWARD LENGTH=325 | 201606	35 kDa			2	3	3	6		2	2	3	5	11	2.2
AT1G77510.1	| PDI-like 1-2 | Chr1:29126742-29129433 FORWARD LENGTH=508 | 201606	56 kDa				5	7	10			1	2	7	15	2.14286
AT1G67800.1	| Copine (Calcium-dependent phospholipid-binding protein) family | Chr1:25421029-25423237 REVERSE LENGTH=433 | 201606	47 kDa			2	6	7	17	10	16	3	3	19	39	2.05263
AT1G02305.1	| Cysteine proteinases superfamily protein | Chr1:455816-457974 FORWARD LENGTH=362 | 201606	40 kDa			1			2			1	1	1	2	2
AT2G19730.1	| Ribosomal L28e protein family | Chr2:8511752-8512995 FORWARD LENGTH=143 | 201606	16 kDa					1	4	1		2	1	2	4	2
AT2G37690.1	| phosphoribosylaminoimidazole carboxylase%2C putative / AIR carboxylase | Chr2:15806111-15810240 FORWARD LENGTH=642 | 201606	70 kDa			2	8	6	5	1	5	3	3	9	18	2
AT2G38040.1	| acetyl Co-enzyme a carboxylase carboxyltransferase alpha subunit | Chr2:15917612-15920749 FORWARD LENGTH=769 | 201606	85 kDa	2	4	1	2		4	3	2	3	4	6	12	2
AT2G41090.1	| Calcium-binding EF-hand family protein | Chr2:17135823-17136618 FORWARD LENGTH=191 | 201606	22 kDa				4	2	2	2	2	2	3	4	8	2
AT2G42490.1	| Copper amine oxidase family protein | Chr2:17691600-17695526 REVERSE LENGTH=776 | 201606	87 kDa			2	2		2			1	2	2	4	2
AT3G22330.1	| putative mitochondrial RNA helicase 2 | Chr3:7892641-7895145 FORWARD LENGTH=616 | 201606	65 kDa				2	2	2			1	2	2	4	2
AT4G12130.1	| Glycine cleavage T-protein family | Chr4:7263640-7265425 FORWARD LENGTH=393 | 201606	44 kDa			1	5	2	3	1		3	2	4	8	2
AT4G30810.1	| serine carboxypeptidase-like 29 | Chr4:15003474-15006017 FORWARD LENGTH=479 | 201606	53 kDa	2	3						1	1	2	2	4	2
AT4G34920.1	| PLC-like phosphodiesterases superfamily protein | Chr4:16635745-16636701 FORWARD LENGTH=318 | 201606	36 kDa			1	2	2	4	2	4	3	3	5	10	2
AT5G52470.1	| fibrillarin 1 | Chr5:21294290-21296509 FORWARD LENGTH=308 | 201606	33 kDa		1		1		1	2	1	1	4	2	4	2
AT2G01540.1	| Calcium-dependent lipid-binding (CaLB domain) family protein | Chr2:242297-243233 REVERSE LENGTH=180 | 201606	20 kDa				3	4	4	2	4	2	3	6	11	1.83333
AT5G45510.1	| Leucine-rich repeat (LRR) family protein | Chr5:18444798-18449071 FORWARD LENGTH=1222 | 201606	138 kDa			5	5	6	15	5	9	3	3	16	29	1.8125
AT2G47250.1	| RNA helicase family protein | Chr2:19399923-19402981 REVERSE LENGTH=729 | 201606	83 kDa			4	4	1	5			2	2	5	9	1.8
AT2G34430.1	| light-harvesting chlorophyll-protein complex II subunit B1 | Chr2:14524818-14525618 FORWARD LENGTH=266 | 201606	28 kDa		21		28	28	33	31	23	2	4	59	105	1.77966
AT1G03630.1	| protochlorophyllide oxidoreductase C | Chr1:907699-909245 FORWARD LENGTH=401 | 201606	44 kDa			5	4	1	5	2	5	3	3	8	14	1.75
AT1G52760.1	| lysophospholipase 2 | Chr1:19651378-19652576 FORWARD LENGTH=332 | 201606	37 kDa				2	1	2	3	3	2	3	4	7	1.75
AT5G14260.1	| Rubisco methyltransferase family protein | Chr5:4601139-4603873 FORWARD LENGTH=514 | 201606	58 kDa			1	5	4	6	3	3	3	3	8	14	1.75
AT1G11720.2	| starch synthase 3 | Chr1:3951597-3956840 FORWARD LENGTH=1094 | 201606	124 kDa			9	13	6	16	8	11	3	3	23	40	1.73913
AT1G30630.1	| Coatomer epsilon subunit | Chr1:10858546-10860173 REVERSE LENGTH=292 | 201606	33 kDa	2	2	4	2		4	1	4	3	4	7	12	1.71429
AT5G42650.1	| allene oxide synthase | Chr5:17097803-17099359 REVERSE LENGTH=518 | 201606	58 kDa			2	3	2	5	3	4	3	3	7	12	1.71429
AT5G44720.1	| Molybdenum cofactor sulfurase family protein | Chr5:18043086-18045275 FORWARD LENGTH=308 | 201606	35 kDa			1	5	2	6	4	1	3	3	7	12	1.71429
AT5G52920.1	| plastidic pyruvate kinase beta subunit 1 | Chr5:21463680-21466612 FORWARD LENGTH=579 | 201606	64 kDa			4	5	1	4	2	3	3	3	7	12	1.71429
AT1G25220.1	| anthranilate synthase beta subunit 1 | Chr1:8837430-8839478 REVERSE LENGTH=276 | 201606	30 kDa			5	8	3	6	4	6	3	3	12	20	1.66667
AT1G63000.1	| nucleotide-rhamnose synthase/epimerase-reductase | Chr1:23342510-23343859 FORWARD LENGTH=301 | 201606	34 kDa	3	4		2	3	5	3	4	3	4	9	15	1.66667
AT2G05990.1	| NAD(P)-binding Rossmann-fold superfamily protein | Chr2:2322876-2324867 FORWARD LENGTH=390 | 201606	41 kDa			2	4	3	6	4	5	3	3	9	15	1.66667
AT2G25970.1	| KH domain-containing protein | Chr2:11071844-11075604 REVERSE LENGTH=632 | 201606	65 kDa			1	3	2	2			2	2	3	5	1.66667
AT3G02770.1	| Ribonuclease E inhibitor RraA/Dimethylmenaquinone methyltransferase | Chr3:601017-601884 REVERSE LENGTH=166 | 201606	18 kDa			5	11	7	9	3	5	3	3	15	25	1.66667
AT5G19820.1	| ARM repeat superfamily protein | Chr5:6695731-6701247 REVERSE LENGTH=1116 | 201606	124 kDa			2	2	1	1		2	2	3	3	5	1.66667
AT5G64050.1	| glutamate tRNA synthetase | Chr5:25630196-25633099 REVERSE LENGTH=570 | 201606	63 kDa			2	4	5	5	2	6	3	3	9	15	1.66667
AT5G64130.1	| cAMP-regulated phosphoprotein 19-related protein | Chr5:25664547-25665339 REVERSE LENGTH=115 | 201606	12 kDa				1	3	3		1	1	3	3	5	1.66667
AT5G67500.2	| voltage dependent anion channel 2 | Chr5:26935223-26937123 FORWARD LENGTH=303 | 201606	33 kDa			2	5		2	4	3	2	3	6	10	1.66667
AT4G27440.1	| protochlorophyllide oxidoreductase B | Chr4:13725648-13727107 FORWARD LENGTH=401 | 201606	43 kDa	2	5	2	3	1	2	3	3	4	4	8	13	1.625
AT5G59890.1	| actin depolymerizing factor 4 | Chr5:24122545-24123596 FORWARD LENGTH=139 | 201606	16 kDa			4	5	5	10	4	6	3	3	13	21	1.61538
AT1G34430.1	| 2-oxoacid dehydrogenases acyltransferase family protein | Chr1:12588027-12590084 REVERSE LENGTH=465 | 201606	48 kDa	2	5		1		1	3	1	2	4	5	8	1.6
AT2G44640.1	| TRIGALACTOSYLDIACYLGLYCEROL-like protein | Chr2:18417286-18419063 FORWARD LENGTH=451 | 201606	50 kDa	6	3		4	1	5	3	4	3	4	10	16	1.6
AT5G03430.1	| phosphoadenosine phosphosulfate (PAPS) reductase family protein | Chr5:849237-852867 REVERSE LENGTH=497 | 201606	55 kDa			1	3	2	3	2	2	3	3	5	8	1.6
AT5G11920.1	| 6-%261-fructan exohydrolase | Chr5:3839490-3842206 FORWARD LENGTH=550 | 201606	62 kDa			2	2	1	4	2	2	3	3	5	8	1.6
AT1G56050.1	| GTP-binding protein-like protein | Chr1:20963793-20966181 FORWARD LENGTH=421 | 201606	46 kDa			1	4	2	4	4	3	3	3	7	11	1.57143
AT5G51980.1	| Transducin/WD40 repeat-like superfamily protein | Chr5:21113650-21115902 REVERSE LENGTH=437 | 201606	47 kDa			2	6	5	5	2	3	3	3	9	14	1.55556
AT1G20510.1	| OPC-8:0 CoA ligase1 | Chr1:7103645-7105856 REVERSE LENGTH=546 | 201606	59 kDa			2	8	5	8	6	4	3	3	13	20	1.53846
AT3G09810.1	| isocitrate dehydrogenase VI | Chr3:3008753-3011070 FORWARD LENGTH=374 | 201606	41 kDa			6	15	8	12	7	5	3	3	21	32	1.52381
AT1G01800.1	| NAD(P)-binding Rossmann-fold superfamily protein | Chr1:293396-294888 FORWARD LENGTH=295 | 201606	32 kDa			2	2	2	2		2	2	3	4	6	1.5
AT1G21230.1	| wall associated kinase 5 | Chr1:7429980-7432346 FORWARD LENGTH=733 | 201606	82 kDa				4			4	2	1	2	4	6	1.5
AT1G31730.1	| Adaptin family protein | Chr1:11359907-11363916 FORWARD LENGTH=938 | 201606	104 kDa			2	4	3	4	1	1	3	3	6	9	1.5
AT1G70770.1	| transmembrane protein (Protein of unknown function DUF2359%2C transmembrane) | Chr1:26688622-26691185 REVERSE LENGTH=610 | 201606	67 kDa	2			1	1	3	1	2	3	3	4	6	1.5
AT1G76850.1	| exocyst complex component sec5 | Chr1:28848013-28854282 FORWARD LENGTH=1090 | 201606	122 kDa	4	6							1	1	4	6	1.5
AT2G29570.1	| proliferating cell nuclear antigen 2 | Chr2:12650139-12651598 REVERSE LENGTH=264 | 201606	29 kDa			2	2	1	4	3	3	3	3	6	9	1.5
AT3G13110.1	| serine acetyltransferase 2%3B2 | Chr3:4214939-4216114 REVERSE LENGTH=391 | 201606	43 kDa			2	2	2	5	2	2	3	3	6	9	1.5
AT3G42050.1	| vacuolar ATP synthase subunit H family protein | Chr3:14228846-14232228 REVERSE LENGTH=441 | 201606	50 kDa	2	4		2	2				2	2	4	6	1.5
AT3G51160.1	| NAD(P)-binding Rossmann-fold superfamily protein | Chr3:19007232-19008353 REVERSE LENGTH=373 | 201606	42 kDa	2	1		2	2	4	2	2	3	4	6	9	1.5
AT4G09020.1	| isoamylase 3 | Chr4:5784099-5788839 FORWARD LENGTH=764 | 201606	86 kDa			2	9	8	10	4	2	3	3	14	21	1.5
AT4G13310.1	| cytochrome P450%2C family 71%2C subfamily A%2C polypeptide 20 | Chr4:7750453-7753049 FORWARD LENGTH=497 | 201606	57 kDa			1	3	2	3	1		3	2	4	6	1.5
AT4G23670.1	| Polyketide cyclase/dehydrase and lipid transport superfamily protein | Chr4:12332846-12333656 REVERSE LENGTH=151 | 201606	18 kDa				3	2				1	1	2	3	1.5
AT5G04280.1	| RNA-binding (RRM/RBD/RNP motifs) family protein with retrovirus zinc finger-like domain-containing protein | Chr5:1192461-1195413 FORWARD LENGTH=310 | 201606	33 kDa				3	3	4	3	2	2	3	6	9	1.5
AT5G45390.1	| CLP protease P4 | Chr5:18396351-18397586 FORWARD LENGTH=292 | 201606	32 kDa	2		2	5		1			2	2	4	6	1.5
AT5G45680.1	| FK506-binding protein 13 | Chr5:18530894-18532128 FORWARD LENGTH=208 | 201606	22 kDa	4	6							1	1	4	6	1.5
AT5G52520.1	| Class II aaRS and biotin synthetases superfamily protein | Chr5:21311112-21313875 FORWARD LENGTH=543 | 201606	61 kDa					1	3	1		2	1	2	3	1.5
AT3G55440.1	| triosephosphate isomerase | Chr3:20553794-20556078 FORWARD LENGTH=254 | 201606	27 kDa	1	2	8	8	7	12	4	7	4	4	20	29	1.45
AT2G31880.1	| Leucine-rich repeat protein kinase family protein | Chr2:13554920-13556845 FORWARD LENGTH=641 | 201606	71 kDa	2	2	2	4	3	4	2	3	4	4	9	13	1.44444
AT5G13430.1	| Ubiquinol-cytochrome C reductase iron-sulfur subunit | Chr5:4305414-4307399 REVERSE LENGTH=272 | 201606	30 kDa	2	3	3	4	2	2	2	4	4	4	9	13	1.44444
AT1G13280.1	| allene oxide cyclase 4 | Chr1:4547624-4548552 FORWARD LENGTH=254 | 201606	28 kDa			4	4		4	3	2	2	3	7	10	1.42857
AT1G24100.1	| UDP-glucosyl transferase 74B1 | Chr1:8525547-8527010 REVERSE LENGTH=460 | 201606	51 kDa			5	9	5	7	4	4	3	3	14	20	1.42857
AT5G58220.3	| transthyretin-like protein | Chr5:23554546-23555861 REVERSE LENGTH=311 | 201606	34 kDa			2	2	2	4	3	4	3	3	7	10	1.42857
AT1G06620.1	| 2-oxoglutarate (2OG) and Fe(II)-dependent oxygenase superfamily protein | Chr1:2025618-2027094 FORWARD LENGTH=365 | 201606	40 kDa			5	5	5	6	2	6	3	3	12	17	1.41667
AT3G13860.1	| heat shock protein 60-3A | Chr3:4561704-4565133 REVERSE LENGTH=572 | 201606	60 kDa	2	3	7	14	5	9	10	8	4	4	24	34	1.41667
AT2G19520.1	| Transducin family protein / WD-40 repeat family protein | Chr2:8456006-8459235 FORWARD LENGTH=507 | 201606	56 kDa			1	4	4	9	5	1	3	3	10	14	1.4
AT3G46510.1	| plant U-box 13 | Chr3:17124106-17126539 REVERSE LENGTH=660 | 201606	72 kDa			3	2		2	2	3	2	3	5	7	1.4
AT3G52400.1	| syntaxin of plants 122 | Chr3:19425835-19427032 REVERSE LENGTH=341 | 201606	38 kDa		1	3	5	4	4	3	4	3	4	10	14	1.4
AT4G11150.1	| vacuolar ATP synthase subunit E1 | Chr4:6800091-6801696 FORWARD LENGTH=230 | 201606	26 kDa	2	3		1	2	2	1	1	3	4	5	7	1.4
AT4G26900.1	| HIS HF | Chr4:13515514-13519608 FORWARD LENGTH=592 | 201606	64 kDa				2	3	3	2	2	2	3	5	7	1.4
AT5G10290.1	| leucine-rich repeat transmembrane protein kinase family protein | Chr5:3235462-3238171 REVERSE LENGTH=613 | 201606	69 kDa	3	2	1			2	1	3	3	3	5	7	1.4
AT4G34740.1	| GLN phosphoribosyl pyrophosphate amidotransferase 2 | Chr4:16574894-16576579 REVERSE LENGTH=561 | 201606	61 kDa			11	14	8	16	10	10	3	3	29	40	1.37931
AT1G48030.1	| mitochondrial lipoamide dehydrogenase 1 | Chr1:17717432-17719141 REVERSE LENGTH=507 | 201606	54 kDa			4	2	4	2		7	2	3	8	11	1.375
AT5G40810.1	| Cytochrome C1 family | Chr5:16340200-16342327 FORWARD LENGTH=307 | 201606	34 kDa	2	1	2	3	2	5	2	2	4	4	8	11	1.375
AT5G13030.1	| selenoprotein O | Chr5:4133216-4136461 FORWARD LENGTH=633 | 201606	71 kDa			14	21	22	34	23	26	3	3	59	81	1.37288
AT4G16130.1	| arabinose kinase | Chr4:9120875-9127656 FORWARD LENGTH=1039 | 201606	114 kDa			3	6	5	5	3	4	3	3	11	15	1.36364
AT1G21750.2	| PDI-like 1-1 | Chr1:7645767-7648695 FORWARD LENGTH=487 | 201606	54 kDa			16	14	17	30	17	24	3	3	50	68	1.36
AT1G01080.1	| RNA-binding (RRM/RBD/RNP motifs) family protein | Chr1:45503-46789 REVERSE LENGTH=293 | 201606	33 kDa				2	3	2			1	2	3	4	1.33333
AT1G06130.1	| glyoxalase 2-4 | Chr1:1858034-1860640 REVERSE LENGTH=331 | 201606	37 kDa					1	3	2	1	2	2	3	4	1.33333
AT1G16460.1	| rhodanese homologue 2 | Chr1:5619848-5621981 REVERSE LENGTH=318 | 201606	35 kDa			4	4	2	4	3	4	3	3	9	12	1.33333
AT1G63500.1	| kinase with tetratricopeptide repeat domain-containing protein | Chr1:23556015-23558403 FORWARD LENGTH=487 | 201606	55 kDa	1		1	3	2	3	2	2	4	3	6	8	1.33333
AT1G70810.1	| Calcium-dependent lipid-binding (CaLB domain) family protein | Chr1:26704207-26705091 FORWARD LENGTH=165 | 201606	19 kDa					2	4	1		2	1	3	4	1.33333
AT2G03820.1	| nonsense-mediated mRNA decay NMD3 family protein | Chr2:1165149-1166699 REVERSE LENGTH=516 | 201606	59 kDa			3	2	1	4	2	2	3	3	6	8	1.33333
AT2G23610.1	| methyl esterase 3 | Chr2:10044410-10046403 REVERSE LENGTH=263 | 201606	30 kDa			2	2	2	4	2	2	3	3	6	8	1.33333
AT2G45770.1	| signal recognition particle receptor protein%2C chloroplast (FTSY) | Chr2:18851248-18853402 FORWARD LENGTH=366 | 201606	40 kDa			2	2		4	4	2	2	3	6	8	1.33333
AT3G02080.1	| Ribosomal protein S19e family protein | Chr3:364138-365161 REVERSE LENGTH=143 | 201606	16 kDa		5	4	9	8	7	6	3	3	4	18	24	1.33333
AT3G13490.1	| Lysyl-tRNA synthetase%2C class II | Chr3:4395984-4399302 REVERSE LENGTH=602 | 201606	68 kDa				3	3	3	3	2	2	3	6	8	1.33333
AT3G14010.5	| CTC-interacting domain 4 | Chr3:4637054-4640691 FORWARD LENGTH=603 | 201606	67 kDa			1		2	3		1	2	2	3	4	1.33333
AT3G63170.1	| Chalcone-flavanone isomerase family protein | Chr3:23334675-23335993 FORWARD LENGTH=279 | 201606	30 kDa			3	6	6	7	3	3	3	3	12	16	1.33333
AT4G11260.1	| phosphatase-like protein | Chr4:6851515-6853719 REVERSE LENGTH=358 | 201606	40 kDa						2	3	2	1	2	3	4	1.33333
AT4G32470.1	| Cytochrome bd ubiquinol oxidase%2C 14kDa subunit | Chr4:15669641-15671095 REVERSE LENGTH=122 | 201606	15 kDa			2	4	2	2	2	2	3	3	6	8	1.33333
AT4G35100.1	| plasma membrane intrinsic protein 3 | Chr4:16708672-16709958 FORWARD LENGTH=280 | 201606	30 kDa	8	8	1	2	2	2	1	4	4	4	12	16	1.33333
AT5G10870.1	| chorismate mutase 2 | Chr5:3430691-3432272 REVERSE LENGTH=265 | 201606	30 kDa			1	1		3	2		2	2	3	4	1.33333
AT5G13420.1	| Aldolase-type TIM barrel family protein | Chr5:4302080-4304212 REVERSE LENGTH=438 | 201606	48 kDa			3	4			3	4	2	2	6	8	1.33333
AT5G66680.1	| dolichyl-diphosphooligosaccharide-protein glycosyltransferase 48kDa subunit family protein | Chr5:26617840-26620581 REVERSE LENGTH=437 | 201606	49 kDa	4		2	2		4		2	2	3	6	8	1.33333
AT5G35530.1	| Ribosomal protein S3 family protein | Chr5:13710355-13712192 REVERSE LENGTH=248 | 201606	27 kDa	28	37							1	1	28	37	1.32143
AT1G76080.1	| chloroplastic drought-induced stress protein of 32 kD | Chr1:28548063-28549348 REVERSE LENGTH=302 | 201606	34 kDa	1	1	4	12	8	8	9	8	4	4	22	29	1.31818
AT1G79500.1	| Aldolase-type TIM barrel family protein | Chr1:29903604-29905989 FORWARD LENGTH=290 | 201606	32 kDa			10	17	13	17	12	12	3	3	35	46	1.31429
AT2G04030.1	| Chaperone protein htpG family protein | Chr2:1281983-1285909 FORWARD LENGTH=780 | 201606	89 kDa	5		6	10	5	13	10	11	4	3	26	34	1.30769
AT5G26710.1	| Glutamyl/glutaminyl-tRNA synthetase%2C class Ic | Chr5:9305673-9308247 FORWARD LENGTH=719 | 201606	81 kDa	2		2	6	2	7	7	4	4	3	13	17	1.30769
AT3G63410.1	| S-adenosyl-L-methionine-dependent methyltransferases superfamily protein | Chr3:23415816-23417002 REVERSE LENGTH=338 | 201606	38 kDa			3	2	3	8	4	3	3	3	10	13	1.3
AT1G03030.1	| P-loop containing nucleoside triphosphate hydrolases superfamily protein | Chr1:701621-703568 FORWARD LENGTH=301 | 201606	34 kDa			4	7	7	8	6	7	3	3	17	22	1.29412
AT1G79380.1	| Ca(2)-dependent phospholipid-binding protein (Copine) family | Chr1:29860812-29863023 FORWARD LENGTH=401 | 201606	44 kDa			6	8	6	6	5	8	3	3	17	22	1.29412
AT4G21450.1	| PapD-like superfamily protein | Chr4:11426136-11428125 FORWARD LENGTH=295 | 201606	33 kDa	3	2	4	7	4	7	6	6	4	4	17	22	1.29412
AT1G60420.1	| DC1 domain-containing protein | Chr1:22261978-22264243 FORWARD LENGTH=578 | 201606	65 kDa			2	2	2	3	3	4	3	3	7	9	1.28571
AT3G62240.1	| RING/U-box superfamily protein | Chr3:23033592-23036653 REVERSE LENGTH=812 | 201606	90 kDa				5	5	4	2		2	2	7	9	1.28571
AT3G63160.1	| outer envelope membrane protein | Chr3:23333773-23333982 REVERSE LENGTH=69 | 201606	7 kDa	2	4	1	3	2	1	2	1	4	4	7	9	1.28571
AT4G39080.1	| vacuolar proton ATPase A3 | Chr4:18209513-18214752 FORWARD LENGTH=821 | 201606	93 kDa	12	15		2		1	2		2	3	14	18	1.28571
AT5G40390.1	| Raffinose synthase family protein | Chr5:16161720-16165085 FORWARD LENGTH=783 | 201606	86 kDa			5	10	7	8	9	9	3	3	21	27	1.28571
ATCG00800.1	| structural constituent of ribosome | ChrC:82826-83482 REVERSE LENGTH=218 | 201606	25 kDa	25	31	1	3		1	2	1	3	4	28	36	1.28571
AT2G47730.1	| glutathione S-transferase phi 8 | Chr2:19558213-19559266 FORWARD LENGTH=263 | 201606	29 kDa	8	10	4	13	14	19	14	9	4	4	40	51	1.275
AT2G20580.1	| 26S proteasome regulatory subunit S2 1A | Chr2:8859211-8864699 FORWARD LENGTH=891 | 201606	98 kDa	4	4	10	13	10	18	9	7	4	4	33	42	1.27273
AT2G42210.2	| Mitochondrial import inner membrane translocase subunit Tim17/Tim22/Tim23 family protein | Chr2:17590600-17591591 FORWARD LENGTH=173 | 201606	19 kDa	5	6	4	6	2	3	4	4	4	4	15	19	1.26667
AT1G08050.1	| Zinc finger (C3HC4-type RING finger) family protein | Chr1:2499088-2501311 REVERSE LENGTH=641 | 201606	70 kDa			6	6	6	10	7	8	3	3	19	24	1.26316
AT1G55090.1	| carbon-nitrogen hydrolase family protein | Chr1:20554857-20558188 FORWARD LENGTH=725 | 201606	81 kDa			6	13	11	14	6	2	3	3	23	29	1.26087
AT1G29670.2	| GDSL-like Lipase/Acylhydrolase superfamily protein | Chr1:10375639-10377717 FORWARD LENGTH=431 | 201606	48 kDa	8	10							1	1	8	10	1.25
AT1G54080.1	| oligouridylate-binding protein 1A | Chr1:20183923-20186824 REVERSE LENGTH=426 | 201606	47 kDa			4	7	3	3	5	5	3	3	12	15	1.25
AT2G30140.1	| UDP-Glycosyltransferase superfamily protein | Chr2:12872200-12873691 FORWARD LENGTH=455 | 201606	52 kDa			2	3	3	3	3	4	3	3	8	10	1.25
AT2G45240.1	| methionine aminopeptidase 1A | Chr2:18656059-18658906 FORWARD LENGTH=398 | 201606	44 kDa				2	4	6	4	2	2	3	8	10	1.25
AT3G11820.1	| syntaxin of plants 121 | Chr3:3729540-3730868 REVERSE LENGTH=346 | 201606	38 kDa	1		4	9	3	6	8	5	4	3	16	20	1.25
AT3G15810.1	| LURP-one-like protein (DUF567) | Chr3:5348054-5349178 REVERSE LENGTH=220 | 201606	25 kDa				2	3	2	1	1	2	3	4	5	1.25
AT3G53110.1	| P-loop containing nucleoside triphosphate hydrolases superfamily protein | Chr3:19687968-19690423 FORWARD LENGTH=496 | 201606	55 kDa			3	4	5	4		2	2	3	8	10	1.25
AT3G55120.1	| Chalcone-flavanone isomerase family protein | Chr3:20430248-20431415 REVERSE LENGTH=246 | 201606	27 kDa			4	4	4	6	4	5	3	3	12	15	1.25
AT3G56150.1	| eukaryotic translation initiation factor 3C | Chr3:20833790-20836820 REVERSE LENGTH=900 | 201606	103 kDa				3	4	2			1	2	4	5	1.25
AT3G62530.1	| ARM repeat superfamily protein | Chr3:23132219-23133121 FORWARD LENGTH=221 | 201606	25 kDa			4	4	4	6	4	5	3	3	12	15	1.25
AT4G02860.1	| Phenazine biosynthesis PhzC/PhzF protein | Chr4:1268952-1270508 REVERSE LENGTH=313 | 201606	34 kDa			2			2	2	3	2	2	4	5	1.25
AT4G10790.1	| UBX domain-containing protein | Chr4:6640752-6643035 REVERSE LENGTH=480 | 201606	53 kDa			2	2			2	3	2	2	4	5	1.25
AT4G17100.1	| poly(U)-specific endoribonuclease-B protein | Chr4:9610164-9612513 REVERSE LENGTH=435 | 201606	50 kDa			2	4	4	4	2	2	3	3	8	10	1.25
AT4G39200.1	| Ribosomal protein S25 family protein | Chr4:18257464-18258464 FORWARD LENGTH=108 | 201606	12 kDa	3	3		1	1	1			2	3	4	5	1.25
AT5G13520.1	| peptidase M1 family protein | Chr5:4342117-4344571 REVERSE LENGTH=616 | 201606	69 kDa			2	8	3	3	7	4	3	3	12	15	1.25
AT5G22770.1	| alpha-adaptin | Chr5:7579844-7588026 REVERSE LENGTH=1012 | 201606	112 kDa			4	5	3	6	5	4	3	3	12	15	1.25
AT5G61060.1	| histone deacetylase 5 | Chr5:24567137-24570917 REVERSE LENGTH=660 | 201606	73 kDa			2	4	6	9	4	2	3	3	12	15	1.25
AT5G65020.1	| annexin 2 | Chr5:25973915-25975554 FORWARD LENGTH=317 | 201606	36 kDa	2		2	2	3	4	1	4	4	3	8	10	1.25
AT3G57890.1	| Tubulin binding cofactor C domain-containing protein | Chr3:21438271-21441695 FORWARD LENGTH=573 | 201606	63 kDa		1	4	8	8	10	9	7	3	4	21	26	1.2381
ATCG00020.1	| photosystem II reaction center protein A | ChrC:383-1444 REVERSE LENGTH=353 | 201606	39 kDa	15	17	6	10	5	8	8	7	4	4	34	42	1.23529
AT4G33470.1	| histone deacetylase 14 | Chr4:16102774-16105439 REVERSE LENGTH=423 | 201606	46 kDa	41	38	10	26	21	28	26	28	4	4	98	120	1.22449
AT3G14240.1	| Subtilase family protein | Chr3:4741637-4743964 REVERSE LENGTH=775 | 201606	83 kDa	7	7	7	5	1	5	3	5	4	4	18	22	1.22222
AT5G24530.1	| 2-oxoglutarate (2OG) and Fe(II)-dependent oxygenase superfamily protein | Chr5:8378964-8383154 FORWARD LENGTH=341 | 201606	39 kDa			2	6	4	4	3	1	3	3	9	11	1.22222
AT1G73080.1	| PEP1 receptor 1 | Chr1:27484513-27488021 FORWARD LENGTH=1123 | 201606	123 kDa	21	5	4	13	7	22	14	16	4	4	46	56	1.21739
AT1G20200.1	| PAM domain (PCI/PINT associated module) protein | Chr1:7001409-7004154 REVERSE LENGTH=488 | 201606	56 kDa			2	7	6	6	6	4	3	3	14	17	1.21429
AT2G41820.1	| Leucine-rich repeat protein kinase family protein | Chr2:17447170-17449914 FORWARD LENGTH=890 | 201606	97 kDa	14	17							1	1	14	17	1.21429
AT4G14570.1	| acylaminoacyl-peptidase-like protein | Chr4:8362125-8366525 FORWARD LENGTH=819 | 201606	90 kDa			8	10	9	11	7	8	3	3	24	29	1.20833
AT5G58290.1	| regulatory particle triple-A ATPase 3 | Chr5:23569155-23571116 FORWARD LENGTH=408 | 201606	46 kDa	2	2	15	14	7	14	10	11	4	4	34	41	1.20588
AT1G04690.1	| potassium channel beta subunit 1 | Chr1:1313662-1315420 FORWARD LENGTH=328 | 201606	37 kDa			3	4	3	5	4	3	3	3	10	12	1.2
AT1G32200.1	| phospholipid/glycerol acyltransferase family protein | Chr1:11602223-11605001 REVERSE LENGTH=459 | 201606	50 kDa				2	2	3	3	1	2	3	5	6	1.2
AT1G57660.1	| Translation protein SH3-like family protein | Chr1:21355567-21356364 FORWARD LENGTH=164 | 201606	19 kDa	5	6							1	1	5	6	1.2
AT2G25830.1	| YebC-like protein | Chr2:11019091-11021665 REVERSE LENGTH=331 | 201606	37 kDa			4	2	1	2		2	2	3	5	6	1.2
AT2G42810.1	| protein phosphatase 5.2 | Chr2:17812336-17815896 REVERSE LENGTH=484 | 201606	55 kDa			5	8	8	10	7	6	3	3	20	24	1.2
AT3G10670.1	| non-intrinsic ABC protein 7 | Chr3:3335325-3337304 REVERSE LENGTH=338 | 201606	37 kDa		1	2	1	1	2	2	2	3	4	5	6	1.2
AT3G21220.1	| MAP kinase kinase 5 | Chr3:7445917-7446963 FORWARD LENGTH=348 | 201606	38 kDa			5	11	8	9	7	4	3	3	20	24	1.2
AT3G55800.1	| sedoheptulose-bisphosphatase | Chr3:20709640-20711421 FORWARD LENGTH=393 | 201606	42 kDa	6	2	3	8	3	5	3	3	4	4	15	18	1.2
AT3G58560.1	| DNAse I-like superfamily protein | Chr3:21650880-21653896 REVERSE LENGTH=602 | 201606	67 kDa			1			4	4	2	2	2	5	6	1.2
AT3G60240.2	| eukaryotic translation initiation factor 4G | Chr3:22261842-22268295 FORWARD LENGTH=1723 | 201606	188 kDa			1	6	4	3	5	3	3	3	10	12	1.2
AT4G13780.1	| methionine-tRNA ligase%2C putative / methionyl-tRNA synthetase%2C putative / MetRS | Chr4:7993366-7998433 REVERSE LENGTH=797 | 201606	90 kDa			5	6	4	4	1	2	3	3	10	12	1.2
AT5G37600.1	| hypothetical protein | Chr5:14933574-14935656 REVERSE LENGTH=356 | 201606	39 kDa	1		3	3	3	6	3	3	4	3	10	12	1.2
AT5G46110.1	| Glucose-6-phosphate/phosphate translocator-like protein | Chr5:18697606-18700212 FORWARD LENGTH=410 | 201606	45 kDa	7	8	6	5	4	5	3	6	4	4	20	24	1.2
AT5G56680.1	| Class II aminoacyl-tRNA and biotin synthetases superfamily protein | Chr5:22936645-22938841 FORWARD LENGTH=572 | 201606	64 kDa			3	5	2	1			2	2	5	6	1.2
AT3G14067.1	| Subtilase family protein | Chr3:4658421-4660754 REVERSE LENGTH=777 | 201606	82 kDa	11	11	10	11	13	19	12	14	4	4	46	55	1.19565
AT3G56240.2	| copper chaperone | Chr3:20863460-20863909 REVERSE LENGTH=111 | 201606	12 kDa	2	2	6	14	12	8	6	7	4	4	26	31	1.19231
AT5G60790.1	| ABC transporter family protein | Chr5:24453760-24455767 REVERSE LENGTH=595 | 201606	67 kDa	6		5	12	10	11	5	8	4	3	26	31	1.19231
AT5G54160.1	| O-methyltransferase 1 | Chr5:21982075-21984167 FORWARD LENGTH=363 | 201606	40 kDa	2		8	9	8	8	3	8	4	3	21	25	1.19048
AT1G45145.1	| thioredoxin H-type 5 | Chr1:17075264-17076256 REVERSE LENGTH=118 | 201606	13 kDa	3	2	3	5	5	7	5	5	4	4	16	19	1.1875
AT5G03290.1	| isocitrate dehydrogenase V | Chr5:794043-795939 FORWARD LENGTH=374 | 201606	41 kDa			15	23	17	23	16	11	3	3	48	57	1.1875
AT1G10200.1	| GATA type zinc finger transcription factor family protein | Chr1:3346677-3347763 REVERSE LENGTH=190 | 201606	21 kDa		3	4	4	4	2	3	4	3	4	11	13	1.18182
ATCG00780.1	| ribosomal protein L14 | ChrC:80696-81064 REVERSE LENGTH=122 | 201606	14 kDa	5	7	2	2	2	2	2	2	4	4	11	13	1.18182
AT3G25800.1	| protein phosphatase 2A subunit A2 | Chr3:9422822-9425783 REVERSE LENGTH=587 | 201606	66 kDa			4	9	10	11	9	7	3	3	23	27	1.17391
AT4G29040.1	| regulatory particle AAA-ATPase 2A | Chr4:14312369-14314386 FORWARD LENGTH=443 | 201606	49 kDa			7	11	6	9	10	7	3	3	23	27	1.17391
AT2G42520.1	| P-loop containing nucleoside triphosphate hydrolases superfamily protein | Chr2:17705382-17708744 FORWARD LENGTH=633 | 201606	68 kDa			28	34	28	27	21	29	3	3	77	90	1.16883
AT1G11750.1	| CLP protease proteolytic subunit 6 | Chr1:3967609-3969535 FORWARD LENGTH=271 | 201606	29 kDa	2		2	2	2	3		2	3	3	6	7	1.16667
AT1G13270.1	| methionine aminopeptidase 1B | Chr1:4544999-4547155 FORWARD LENGTH=369 | 201606	40 kDa			4	6	3	4	5	4	3	3	12	14	1.16667
AT1G60730.1	| NAD(P)-linked oxidoreductase superfamily protein | Chr1:22358327-22360082 REVERSE LENGTH=345 | 201606	38 kDa			14	13	8	14	8	8	3	3	30	35	1.16667
AT1G69840.1	| SPFH/Band 7/PHB domain-containing membrane-associated protein family | Chr1:26293932-26295150 REVERSE LENGTH=286 | 201606	31 kDa			2	3	2	4	2		3	2	6	7	1.16667
AT2G14170.1	| aldehyde dehydrogenase 6B2 | Chr2:5977727-5981899 REVERSE LENGTH=607 | 201606	66 kDa			2	2	2	3	2	2	3	3	6	7	1.16667
AT2G27680.1	| NAD(P)-linked oxidoreductase superfamily protein | Chr2:11803981-11805965 REVERSE LENGTH=384 | 201606	43 kDa			6	6	5	6	7	9	3	3	18	21	1.16667
AT2G30520.1	| Phototropic-responsive NPH3 family protein | Chr2:13002920-13005573 REVERSE LENGTH=593 | 201606	66 kDa			2	4	2	2	2	1	3	3	6	7	1.16667
AT2G38700.1	| mevalonate diphosphate decarboxylase 1 | Chr2:16180918-16183785 REVERSE LENGTH=412 | 201606	46 kDa			3	5	1	2	2		3	2	6	7	1.16667
AT3G47560.2	| alpha/beta-Hydrolases superfamily protein | Chr3:17525575-17526977 REVERSE LENGTH=318 | 201606	36 kDa			2	2	2	3	2	2	3	3	6	7	1.16667
AT4G34490.1	| cyclase associated protein 1 | Chr4:16484896-16487355 REVERSE LENGTH=476 | 201606	51 kDa			2	3	1	2	3	2	3	3	6	7	1.16667
AT5G57655.2	| xylose isomerase family protein | Chr5:23347030-23349805 FORWARD LENGTH=477 | 201606	54 kDa			1	2	2	3	3	2	3	3	6	7	1.16667
AT5G59290.2	| UDP-glucuronic acid decarboxylase 3 | Chr5:23915814-23917998 REVERSE LENGTH=357 | 201606	40 kDa		1	7	3	5	9	6	8	3	4	18	21	1.16667
AT3G14840.2	| Leucine-rich repeat transmembrane protein kinase | Chr3:4988271-4993891 FORWARD LENGTH=1020 | 201606	112 kDa	17	7	4	19	9	12	7	5	4	4	37	43	1.16216
AT2G39770.1	| Glucose-1-phosphate adenylyltransferase family protein | Chr2:16589401-16590741 FORWARD LENGTH=361 | 201606	40 kDa			12	12	9	13	11	12	3	3	32	37	1.15625
AT3G09740.1	| syntaxin of plants 71 | Chr3:2989615-2991354 FORWARD LENGTH=266 | 201606	30 kDa	2	3	3	5	4	5	4	2	4	4	13	15	1.15385
AT4G09570.1	| calcium-dependent protein kinase 4 | Chr4:6049560-6052184 FORWARD LENGTH=501 | 201606	56 kDa			6	12	11	11	9	7	3	3	26	30	1.15385
AT1G74910.1	| ADP-glucose pyrophosphorylase family protein | Chr1:28135770-28138456 REVERSE LENGTH=415 | 201606	46 kDa			6	8	8	7	6	8	3	3	20	23	1.15
AT2G47470.1	| thioredoxin family protein | Chr2:19481503-19483683 FORWARD LENGTH=361 | 201606	39 kDa	1		21	29	24	33	30	25	4	3	76	87	1.14474
AT1G03860.1	| prohibitin 2 | Chr1:979611-981157 REVERSE LENGTH=286 | 201606	32 kDa	2	2	4	2	4	6	4	6	4	4	14	16	1.14286
AT1G47128.1	| Granulin repeat cysteine protease family protein | Chr1:17283139-17285609 REVERSE LENGTH=462 | 201606	51 kDa	6	6	3	10	10	8	9	8	4	4	28	32	1.14286
AT1G52360.1	| Coatomer%2C beta' subunit | Chr1:19499282-19505397 FORWARD LENGTH=926 | 201606	104 kDa	1	6	4	2	2				3	2	7	8	1.14286
AT1G80410.1	| tetratricopeptide repeat (TPR)-containing protein | Chr1:30227963-30234832 REVERSE LENGTH=897 | 201606	102 kDa			2	4	2	4	3		3	2	7	8	1.14286
AT2G34970.1	| Trimeric LpxA-like enzyme | Chr2:14746340-14748532 FORWARD LENGTH=730 | 201606	82 kDa	2	2		2	2	2	3	2	3	4	7	8	1.14286
AT2G47710.1	| Adenine nucleotide alpha hydrolases-like superfamily protein | Chr2:19555045-19555956 REVERSE LENGTH=162 | 201606	17 kDa			4	5		3	3		2	2	7	8	1.14286
AT3G15000.1	| cobalt ion binding protein | Chr3:5050321-5052121 FORWARD LENGTH=395 | 201606	43 kDa			3	5	4	1		2	2	3	7	8	1.14286
AT3G52340.1	| sucrose-6F-phosphate phosphohydrolase 2 | Chr3:19407412-19409182 FORWARD LENGTH=423 | 201606	49 kDa			2	3	3	3	2	2	3	3	7	8	1.14286
AT4G04040.1	| Phosphofructokinase family protein | Chr4:1939250-1942765 FORWARD LENGTH=569 | 201606	63 kDa			2	4	2	2	3	2	3	3	7	8	1.14286
AT5G10300.1	| methyl esterase 5 | Chr5:3239684-3240724 FORWARD LENGTH=258 | 201606	29 kDa			3	3	2	3	2	2	3	3	7	8	1.14286
AT1G53280.1	| Class I glutamine amidotransferase-like superfamily protein | Chr1:19864942-19867341 REVERSE LENGTH=438 | 201606	47 kDa	1	1	13	19	16	15	13	14	4	4	43	49	1.13953
AT1G15820.1	| light harvesting complex photosystem II subunit 6 | Chr1:5446685-5447676 REVERSE LENGTH=258 | 201606	28 kDa	28	22	9	16	12	18	9	10	4	4	58	66	1.13793
AT3G16520.3	| UDP-glucosyl transferase 88A1 | Chr3:5619355-5620833 REVERSE LENGTH=462 | 201606	51 kDa			4	9	10	9	8	7	3	3	22	25	1.13636
AT3G48990.1	| AMP-dependent synthetase and ligase family protein | Chr3:18159031-18161294 REVERSE LENGTH=514 | 201606	56 kDa	1		8	9	7	8	6	8	4	3	22	25	1.13636
AT3G05530.1	| regulatory particle triple-A ATPase 5A | Chr3:1603540-1605993 FORWARD LENGTH=424 | 201606	47 kDa	2	2	11	13	13	13	11	14	4	4	37	42	1.13514
AT1G30380.1	| photosystem I subunit K | Chr1:10722325-10723013 FORWARD LENGTH=130 | 201606	13 kDa	2	5	3	6	4	1	6	5	4	4	15	17	1.13333
AT3G57410.1	| villin 3 | Chr3:21243615-21249809 REVERSE LENGTH=965 | 201606	106 kDa			3	9	4	4	8	4	3	3	15	17	1.13333
AT1G54270.1	| eif4a-2 | Chr1:20260495-20262018 FORWARD LENGTH=412 | 201606	47 kDa		32	53	54	57	57	58	47	3	4	168	190	1.13095
AT3G28450.1	| Leucine-rich repeat protein kinase family protein | Chr3:10667359-10669176 FORWARD LENGTH=605 | 201606	67 kDa	123	112	72	97	84	112	88	92	4	4	367	413	1.12534
AT1G09630.1	| RAB GTPase 11C | Chr1:3118350-3119571 REVERSE LENGTH=217 | 201606	24 kDa		5	8	7	10	8	6	7	3	4	24	27	1.125
AT1G51850.1	| Leucine-rich repeat protein kinase family protein | Chr1:19252964-19256783 REVERSE LENGTH=865 | 201606	96 kDa	8	6	2	4	2	4	4	4	4	4	16	18	1.125
AT2G18020.1	| Ribosomal protein L2 family | Chr2:7837151-7838160 FORWARD LENGTH=258 | 201606	28 kDa	9	9	2	5	1	2	4	2	4	4	16	18	1.125
AT2G29560.1	| cytosolic enolase | Chr2:12646635-12649694 FORWARD LENGTH=475 | 201606	52 kDa			6	3	2	5		1	2	3	8	9	1.125
AT2G31570.1	| glutathione peroxidase 2 | Chr2:13438211-13439775 REVERSE LENGTH=169 | 201606	19 kDa			2	5	4	3	2	1	3	3	8	9	1.125
AT3G19010.1	| 2-oxoglutarate (2OG) and Fe(II)-dependent oxygenase superfamily protein | Chr3:6556306-6557862 REVERSE LENGTH=349 | 201606	41 kDa			4	2	4	4		3	2	3	8	9	1.125
AT3G55770.1	| GATA type zinc finger transcription factor family protein | Chr3:20703799-20705115 FORWARD LENGTH=199 | 201606	22 kDa		2	4	2	2	2	2	3	3	4	8	9	1.125
AT4G23650.1	| calcium-dependent protein kinase 6 | Chr4:12324967-12327415 REVERSE LENGTH=529 | 201606	59 kDa			2	3	1	4	5	2	3	3	8	9	1.125
AT4G34050.1	| S-adenosyl-L-methionine-dependent methyltransferases superfamily protein | Chr4:16310844-16311973 FORWARD LENGTH=259 | 201606	29 kDa	1		4	7	6	8	5	3	4	3	16	18	1.125
ATCG00670.1	| plastid-encoded CLP P | ChrC:69910-71882 REVERSE LENGTH=196 | 201606	22 kDa	4	5		2	2	2	2		3	3	8	9	1.125
AT1G09430.1	| ATP-citrate lyase A-3 | Chr1:3042135-3044978 FORWARD LENGTH=424 | 201606	47 kDa			13	15	15	16	13	15	3	3	41	46	1.12195
AT5G54110.1	| membrane-associated mannitol-induced | Chr5:21958356-21960367 FORWARD LENGTH=266 | 201606	30 kDa	6	3	5	10	9	13	13	11	4	4	33	37	1.12121
AT5G48180.1	| nitrile specifier protein 5 | Chr5:19541283-19542358 REVERSE LENGTH=326 | 201606	36 kDa			6	12	9	9	10	7	3	3	25	28	1.12
AT1G09130.1	| ATP-dependent caseinolytic (Clp) protease/crotonase family protein | Chr1:2940063-2942217 REVERSE LENGTH=330 | 201606	36 kDa	2	4	2	6	7	5	6	4	4	4	17	19	1.11765
AT1G20110.1	| RING/FYVE/PHD zinc finger superfamily protein | Chr1:6971554-6974578 FORWARD LENGTH=601 | 201606	65 kDa			4	5	8	8	5	6	3	3	17	19	1.11765
AT1G71860.1	| protein tyrosine phosphatase 1 | Chr1:27026866-27028675 FORWARD LENGTH=340 | 201606	38 kDa			6	8	6	4	5	7	3	3	17	19	1.11765
AT2G28900.1	| outer plastid envelope protein 16-1 | Chr2:12414423-12415459 REVERSE LENGTH=148 | 201606	15 kDa	6	6			1	2	2	2	3	3	9	10	1.11111
AT2G38860.1	| Class I glutamine amidotransferase-like superfamily protein | Chr2:16233629-16235207 REVERSE LENGTH=389 | 201606	42 kDa			13	15	12	13	11	12	3	3	36	40	1.11111
AT2G38940.1	| phosphate transporter 1%3B4 | Chr2:16258500-16260104 FORWARD LENGTH=534 | 201606	59 kDa	3			5	4	3	2	2	3	3	9	10	1.11111
AT5G62740.1	| SPFH/Band 7/PHB domain-containing membrane-associated protein family | Chr5:25201320-25202535 FORWARD LENGTH=286 | 201606	31 kDa					8	11	10	9	2	2	18	20	1.11111
AT5G64570.1	| beta-D-xylosidase 4 | Chr5:25810227-25813309 REVERSE LENGTH=784 | 201606	84 kDa			20	20	16	20	19	21	3	3	55	61	1.10909
AT5G43940.1	| GroES-like zinc-binding dehydrogenase family protein | Chr5:17684265-17686379 FORWARD LENGTH=379 | 201606	41 kDa			11	11	8	11	9	9	3	3	28	31	1.10714
AT2G23370.1	| cyclin delta-3 | Chr2:9953067-9955018 REVERSE LENGTH=340 | 201606	38 kDa			5	8	9	9	5	4	3	3	19	21	1.10526
AT2G20630.1	| PP2C induced by AVRRPM1 | Chr2:8897826-8899648 REVERSE LENGTH=279 | 201606	30 kDa			4	10	15	13	10	9	3	3	29	32	1.10345
ATCG00130.1	| ATPase%2C F0 complex%2C subunit B/B'%2C bacterial/chloroplast | ChrC:11529-12798 REVERSE LENGTH=184 | 201606	21 kDa	10	9	7	10	7	7	5	6	4	4	29	32	1.10345
AT2G33210.1	| heat shock protein 60-2 | Chr2:14075093-14078568 REVERSE LENGTH=585 | 201606	62 kDa	26	27	37	41	38	48	38	37	4	4	139	153	1.10072
AT2G37620.1	| actin 1 | Chr2:15779761-15781241 FORWARD LENGTH=377 | 201606	42 kDa	28	24	38	52	62	62	51	59	4	4	179	197	1.10056
AT1G06410.1	| trehalose-phosphatase/synthase 7 | Chr1:1955413-1958153 FORWARD LENGTH=851 | 201606	97 kDa	1	1	6	10	10	16	13	6	4	4	30	33	1.1
AT3G43300.1	| HOPM interactor 7 | Chr3:15234235-15245034 REVERSE LENGTH=1758 | 201606	195 kDa			2	5	5	4	3	2	3	3	10	11	1.1
AT3G43980.1	| Ribosomal protein S14p/S29e family protein | Chr3:15778555-15779235 REVERSE LENGTH=56 | 201606	6 kDa	6	7		2	3	1	1	1	3	4	10	11	1.1
AT2G33120.1	| synaptobrevin-related protein 1 | Chr2:14043785-14045337 REVERSE LENGTH=221 | 201606	25 kDa	1	1	10	12	11	10	9	11	4	4	31	34	1.09677
AT1G06950.1	| translocon at the inner envelope membrane of chloroplasts 110 | Chr1:2130303-2135563 REVERSE LENGTH=1016 | 201606	112 kDa	26	21	19	21	18	26	21	24	4	4	84	92	1.09524
AT4G13180.1	| NAD(P)-binding Rossmann-fold superfamily protein | Chr4:7657373-7658164 REVERSE LENGTH=263 | 201606	28 kDa			4	7	3	4	4	1	3	3	11	12	1.09091
AT5G09810.1	| actin 7 | Chr5:3052809-3054220 FORWARD LENGTH=377 | 201606	42 kDa	49	47	76	93	102	104	88	98	4	4	315	342	1.08571
AT3G58510.1	| DEA(D/H)-box RNA helicase family protein | Chr3:21640608-21643464 FORWARD LENGTH=612 | 201606	66 kDa			23	34	36	32	24	24	3	3	83	90	1.08434
AT1G31860.1	| histidine biosynthesis bifunctional protein (HISIE) | Chr1:11434250-11436530 REVERSE LENGTH=281 | 201606	32 kDa			4	2	4	8	4	3	3	3	12	13	1.08333
AT1G50200.1	| Alanyl-tRNA synthetase | Chr1:18591429-18598311 REVERSE LENGTH=1003 | 201606	110 kDa			11	15	12	15	13	9	3	3	36	39	1.08333
AT1G51690.1	| protein phosphatase 2A 55 kDa regulatory subunit B alpha isoform | Chr1:19166218-19169974 FORWARD LENGTH=513 | 201606	57 kDa			6	8	10	8	8	10	3	3	24	26	1.08333
AT2G13560.1	| NAD-dependent malic enzyme 1 | Chr2:5650089-5655103 FORWARD LENGTH=623 | 201606	70 kDa			10	8	9	12	5	6	3	3	24	26	1.08333
AT5G52560.1	| UDP-sugar pyrophosphorylase | Chr5:21331230-21334573 FORWARD LENGTH=614 | 201606	68 kDa			5	8	10	11	9	7	3	3	24	26	1.08333
AT5G63560.1	| HXXXD-type acyl-transferase family protein | Chr5:25449517-25451234 FORWARD LENGTH=426 | 201606	47 kDa			4	6	4	4	4	3	3	3	12	13	1.08333
AT3G46060.1	| RAB GTPase homolog 8A | Chr3:16917908-16919740 FORWARD LENGTH=216 | 201606	24 kDa	7	11	10	10	11	8	9	11	4	4	37	40	1.08108
AT1G14000.1	| VH1-interacting kinase | Chr1:4797606-4800043 FORWARD LENGTH=438 | 201606	49 kDa			14	21	19	19	19	16	3	3	52	56	1.07692
AT1G20560.1	| acyl activating enzyme 1 | Chr1:7119927-7121730 REVERSE LENGTH=556 | 201606	61 kDa			4	5	4	5	5	4	3	3	13	14	1.07692
AT3G44320.1	| nitrilase 3 | Chr3:15993419-15995493 FORWARD LENGTH=346 | 201606	38 kDa			15	15	12	14	13	14	3	3	40	43	1.075
AT1G69740.1	| Aldolase superfamily protein | Chr1:26232197-26234713 FORWARD LENGTH=430 | 201606	47 kDa			26	29	18	18	23	25	3	3	67	72	1.07463
AT1G16340.1	| Aldolase superfamily protein | Chr1:5588123-5590469 REVERSE LENGTH=291 | 201606	32 kDa			8	11	11	11	9	8	3	3	28	30	1.07143
AT1G30580.1	| GTP binding protein | Chr1:10831953-10835454 REVERSE LENGTH=394 | 201606	44 kDa			9	7	10	15	9	8	3	3	28	30	1.07143
AT5G05170.1	| Cellulose synthase family protein | Chr5:1530401-1535090 REVERSE LENGTH=1065 | 201606	120 kDa	2	2	2	5	6	4	4	4	4	4	14	15	1.07143
AT1G27190.1	| Leucine-rich repeat protein kinase family protein | Chr1:9446923-9448728 REVERSE LENGTH=601 | 201606	65 kDa	154	160	116	127	121	135	123	128	4	4	514	550	1.07004
AT4G01850.1	| S-adenosylmethionine synthetase 2 | Chr4:796298-797479 REVERSE LENGTH=393 | 201606	43 kDa	11	16	29	32	32	33	30	28	4	4	102	109	1.06863
AT1G72930.1	| toll/interleukin-1 receptor-like protein | Chr1:27439476-27440147 FORWARD LENGTH=176 | 201606	20 kDa			2	5	8	7	5	4	3	3	15	16	1.06667
AT3G08510.1	| phospholipase C 2 | Chr3:2582626-2585556 REVERSE LENGTH=581 | 201606	66 kDa	2		6	6	2	7	5	3	4	3	15	16	1.06667
AT5G35360.1	| acetyl Co-enzyme a carboxylase biotin carboxylase subunit | Chr5:13584300-13588268 FORWARD LENGTH=537 | 201606	58 kDa			21	23	23	22	16	19	3	3	60	64	1.06667
AT1G18270.1	| ketose-bisphosphate aldolase class-II family protein | Chr1:6283634-6293772 REVERSE LENGTH=1373 | 201606	147 kDa	2		6	7	4	5	4	5	4	3	16	17	1.0625
AT1G54490.1	| exoribonuclease 4 | Chr1:20350300-20356650 FORWARD LENGTH=947 | 201606	108 kDa			7	5	4	8	5	4	3	3	16	17	1.0625
AT3G18130.1	| receptor for activated C kinase 1C | Chr3:6211109-6212371 REVERSE LENGTH=326 | 201606	36 kDa			6	7	5	5	5	5	3	3	16	17	1.0625
AT4G17830.1	| Peptidase M20/M25/M40 family protein | Chr4:9915916-9918049 FORWARD LENGTH=440 | 201606	48 kDa			15	20	16	18	17	13	3	3	48	51	1.0625
AT5G22060.1	| DNAJ homologue 2 | Chr5:7303798-7305668 REVERSE LENGTH=419 | 201606	46 kDa	8	7	9	4	6	14	9	9	4	4	32	34	1.0625
AT5G61780.1	| TUDOR-SN protein 2 | Chr5:24822012-24826641 FORWARD LENGTH=985 | 201606	108 kDa	3	6	3	3	6	5	4	3	4	4	16	17	1.0625
AT5G48300.1	| ADP glucose pyrophosphorylase 1 | Chr5:19570326-19572557 FORWARD LENGTH=520 | 201606	57 kDa	4	2	13	19	17	17	16	15	4	4	50	53	1.06
AT3G24550.1	| proline extensin-like receptor kinase 1 | Chr3:8960411-8963303 FORWARD LENGTH=652 | 201606	69 kDa	4	3	3	5	5	5	5	5	4	4	17	18	1.05882
AT5G19510.1	| Translation elongation factor EF1B/ribosomal protein S6 family protein | Chr5:6581854-6583137 REVERSE LENGTH=224 | 201606	24 kDa	2	2	6	8	6	6	3	2	4	4	17	18	1.05882
AT4G33430.1	| BRI1-associated receptor kinase | Chr4:16086654-16090288 REVERSE LENGTH=615 | 201606	68 kDa	644	635	388	435	411	453	421	446	4	4	1864	1969	1.05633
AT1G09020.1	| sucrose nonfermenting-like protein | Chr1:2900149-2904212 REVERSE LENGTH=487 | 201606	53 kDa			5	4	6	8	7	7	3	3	18	19	1.05556
AT3G15410.1	| Leucine-rich repeat (LRR) family protein | Chr3:5203380-5207279 FORWARD LENGTH=584 | 201606	64 kDa			6	12	6	5	6	2	3	3	18	19	1.05556
AT5G47200.1	| RAB GTPase homolog 1A | Chr5:19167029-19168718 FORWARD LENGTH=202 | 201606	22 kDa	8	8	4	6	3	2	3	3	4	4	18	19	1.05556
AT5G64250.1	| Aldolase-type TIM barrel family protein | Chr5:25697623-25698752 REVERSE LENGTH=293 | 201606	32 kDa			6	7	7	6	5	6	3	3	18	19	1.05556
AT5G19550.1	| aspartate aminotransferase 2 | Chr5:6598201-6601597 FORWARD LENGTH=405 | 201606	44 kDa	6	8	5	4	5	3	3	5	4	4	19	20	1.05263
AT5G57850.1	| D-aminoacid aminotransferase-like PLP-dependent enzymes superfamily protein | Chr5:23435548-23437287 REVERSE LENGTH=373 | 201606	41 kDa			7	7	6	7	6	6	3	3	19	20	1.05263
AT1G49240.1	| actin 8 | Chr1:18216539-18217947 FORWARD LENGTH=377 | 201606	42 kDa	67	67	62	78	89	100	90	79	4	4	308	324	1.05195
AT3G25770.1	| allene oxide cyclase 2 | Chr3:9406975-9407839 FORWARD LENGTH=253 | 201606	28 kDa			13	13	13	14	13	14	3	3	39	41	1.05128
AT1G55670.1	| photosystem I subunit G | Chr1:20802874-20803356 REVERSE LENGTH=160 | 201606	17 kDa	15	9	3	13	13	13	9	7	4	4	40	42	1.05
AT1G66200.3	| hypothetical protein | Chr1:24655520-24657520 REVERSE LENGTH=365 | 201606	40 kDa			7	7	7	8	6	6	3	3	20	21	1.05
AT4G26530.1	| Aldolase superfamily protein | Chr4:13391566-13392937 FORWARD LENGTH=358 | 201606	38 kDa			16	15	14	14	11	14	3	3	41	43	1.04878
AT2G27190.1	| purple acid phosphatase 12 | Chr2:11621400-11623438 REVERSE LENGTH=469 | 201606	54 kDa			6	8	6	8	9	6	3	3	21	22	1.04762
AT3G25860.1	| 2-oxoacid dehydrogenases acyltransferase family protein | Chr3:9460632-9462585 FORWARD LENGTH=480 | 201606	50 kDa	6	3	5	8	4	8	6	3	4	4	21	22	1.04762
AT3G17970.1	| translocon at the outer membrane of chloroplasts 64-III | Chr3:6148030-6151794 FORWARD LENGTH=589 | 201606	64 kDa			11	7	6	13	5	3	3	3	22	23	1.04545
ATMG00070.1	| NADH dehydrogenase subunit 9 | ChrM:23663-24235 REVERSE LENGTH=190 | 201606	23 kDa		2	4	7	9	6	9	8	3	4	22	23	1.04545
AT3G19820.1	| cell elongation protein / DWARF1 / DIMINUTO (DIM) | Chr3:6879835-6881616 REVERSE LENGTH=561 | 201606	65 kDa	14	12	11	11	10	13	10	11	4	4	45	47	1.04444
AT3G04790.1	| Ribose 5-phosphate isomerase%2C type A protein | Chr3:1313365-1314195 FORWARD LENGTH=276 | 201606	29 kDa		1	29	37	31	26	31	31	3	4	91	95	1.04396
AT3G11630.1	| Thioredoxin superfamily protein | Chr3:3672189-3673937 FORWARD LENGTH=266 | 201606	29 kDa	7	7	7	6	3	7	6	4	4	4	23	24	1.04348
AT3G16400.1	| nitrile specifier protein 1 | Chr3:5566516-5568330 FORWARD LENGTH=470 | 201606	52 kDa	2	1	21	36	32	36	37	23	4	4	92	96	1.04348
AT2G44060.1	| Late embryogenesis abundant protein%2C group 2 | Chr2:18226922-18227988 FORWARD LENGTH=325 | 201606	36 kDa			18	31	27	21	28	24	3	3	73	76	1.0411
AT5G35630.1	| glutamine synthetase 2 | Chr5:13831220-13833239 FORWARD LENGTH=430 | 201606	47 kDa	2		24	38	36	36	36	28	4	3	98	102	1.04082
AT3G23990.1	| heat shock protein 60 | Chr3:8669013-8672278 FORWARD LENGTH=577 | 201606	61 kDa	31	36	50	53	48	54	54	47	4	4	183	190	1.03825
AT3G19990.1	| E3 ubiquitin-protein ligase | Chr3:6965671-6967102 FORWARD LENGTH=425 | 201606	48 kDa			8	7	8	11	11	10	3	3	27	28	1.03704
AT5G19770.1	| tubulin alpha-3 | Chr5:6682761-6684474 REVERSE LENGTH=450 | 201606	50 kDa	25	19	25	31	31	37	30	28	4	4	111	115	1.03604
AT4G14040.1	| selenium-binding protein 2 | Chr4:8100691-8102828 REVERSE LENGTH=487 | 201606	54 kDa			11	6	12	15	5	8	3	3	28	29	1.03571
AT5G59840.1	| Ras-related small GTP-binding family protein | Chr5:24107450-24109049 REVERSE LENGTH=216 | 201606	24 kDa			7	11	12	8	10	11	3	3	29	30	1.03448
AT5G48380.1	| BAK1-interacting receptor-like kinase 1 | Chr5:19604584-19606532 REVERSE LENGTH=620 | 201606	69 kDa	30	23	18	20	19	27	21	21	4	4	88	91	1.03409
AT5G03340.1	| ATPase%2C AAA-type%2C CDC48 protein | Chr5:810091-813133 REVERSE LENGTH=810 | 201606	90 kDa	2		19	21	20	19	18	21	4	3	59	61	1.0339
AT3G23600.1	| alpha/beta-Hydrolases superfamily protein | Chr3:8473833-8475655 FORWARD LENGTH=239 | 201606	26 kDa			8	13	10	12	12	6	3	3	30	31	1.03333
AT2G41680.1	| NADPH-dependent thioredoxin reductase C | Chr2:17376349-17379028 REVERSE LENGTH=529 | 201606	58 kDa			30	36	33	34	28	24	3	3	91	94	1.03297
AT1G13440.1	| glyceraldehyde-3-phosphate dehydrogenase C2 | Chr1:4608465-4610494 REVERSE LENGTH=338 | 201606	37 kDa	44	34	104	113	102	114	102	102	4	4	352	363	1.03125
AT1G09620.1	| ATP binding/leucine-tRNA ligases/aminoacyl-tRNA ligase | Chr1:3113077-3116455 REVERSE LENGTH=1091 | 201606	123 kDa			23	27	27	29	23	19	3	3	73	75	1.0274
AT3G03780.1	| methionine synthase 2 | Chr3:957602-960740 FORWARD LENGTH=765 | 201606	85 kDa		18	71	67	78	78	72	64	3	4	221	227	1.02715
AT1G55490.1	| chaperonin 60 beta | Chr1:20715717-20718673 REVERSE LENGTH=600 | 201606	64 kDa	20	15	20	26	15	20	21	17	4	4	76	78	1.02632
AT1G65960.2	| glutamate decarboxylase 2 | Chr1:24552094-24557253 FORWARD LENGTH=494 | 201606	56 kDa			11	11	12	11	15	17	3	3	38	39	1.02632
AT1G71830.1	| somatic embryogenesis receptor-like kinase 1 | Chr1:27018575-27021842 FORWARD LENGTH=625 | 201606	69 kDa	278	260	184	211	202	207	199	207	4	4	863	885	1.02549
AT3G43190.1	| sucrose synthase 4 | Chr3:15179204-15182577 REVERSE LENGTH=808 | 201606	93 kDa	3	1	22	36	31	29	29	21	4	4	85	87	1.02353
AT1G23190.1	| Phosphoglucomutase/phosphomannomutase family protein | Chr1:8219946-8224186 FORWARD LENGTH=583 | 201606	63 kDa		2	15	11	17	18	13	15	3	4	45	46	1.02222
AT1G48420.1	| D-cysteine desulfhydrase | Chr1:17896767-17898803 REVERSE LENGTH=401 | 201606	44 kDa			16	15	15	16	14	15	3	3	45	46	1.02222
AT3G20050.1	| T-complex protein 1 alpha subunit | Chr3:6998544-7002266 REVERSE LENGTH=545 | 201606	59 kDa			9	17	20	16	16	13	3	3	45	46	1.02222
AT2G05100.1	| photosystem II light harvesting complex protein 2.1 | Chr2:1823449-1824331 REVERSE LENGTH=265 | 201606	29 kDa	24	19	20	29	24	25	28	25	4	4	96	98	1.02083
AT5G20010.1	| RAS-related nuclear protein-1 | Chr5:6760364-6761747 FORWARD LENGTH=221 | 201606	25 kDa	1	8	18	12	15	17	16	14	4	4	50	51	1.02
AT5G50920.1	| CLPC homologue 1 | Chr5:20715710-20719800 REVERSE LENGTH=929 | 201606	103 kDa	4		63	71	69	76	68	61	4	3	204	208	1.01961
AT4G35790.1	| phospholipase D delta | Chr4:16955774-16959875 REVERSE LENGTH=868 | 201606	99 kDa			21	16	17	23	15	15	3	3	53	54	1.01887
AT3G06580.1	| Mevalonate/galactokinase family protein | Chr3:2049141-2051867 REVERSE LENGTH=496 | 201606	54 kDa			15	19	21	21	19	16	3	3	55	56	1.01818
AT5G67360.1	| Subtilase family protein | Chr5:26872192-26874465 REVERSE LENGTH=757 | 201606	79 kDa	25	26	16	13	10	12	12	13	4	4	63	64	1.01587
AT1G32060.1	| phosphoribulokinase | Chr1:11532668-11534406 FORWARD LENGTH=395 | 201606	44 kDa			19	23	25	28	24	18	3	3	68	69	1.01471
AT4G04640.1	| ATPase%2C F1 complex%2C gamma subunit protein | Chr4:2350761-2351882 REVERSE LENGTH=373 | 201606	41 kDa	20	11	18	25	17	21	29	28	4	4	84	85	1.0119
AT2G36460.1	| Aldolase superfamily protein | Chr2:15296929-15298387 REVERSE LENGTH=358 | 201606	38 kDa			62	64	60	66	61	55	3	3	183	185	1.01093
AT5G08570.1	| Pyruvate kinase family protein | Chr5:2778433-2780300 FORWARD LENGTH=510 | 201606	55 kDa			41	40	29	32	27	26	3	3	97	98	1.01031
AT3G08580.1	| ADP/ATP carrier 1 | Chr3:2605706-2607030 REVERSE LENGTH=381 | 201606	41 kDa	75	65	62	72	60	74	70	58	4	4	267	269	1.00749
AT1G12900.1	| glyceraldehyde 3-phosphate dehydrogenase A subunit 2 | Chr1:4392634-4394283 REVERSE LENGTH=399 | 201606	43 kDa	31	23	42	47	41	47	50	48	4	4	164	165	1.0061
AT3G04120.1	| glyceraldehyde-3-phosphate dehydrogenase C subunit 1 | Chr3:1081077-1083131 FORWARD LENGTH=338 | 201606	37 kDa	44	36	99	107	98	110	102	92	4	4	343	345	1.00583
AT1G03900.1	| non-intrinsic ABC protein 4 | Chr1:991252-992852 FORWARD LENGTH=272 | 201606	30 kDa			7	7	4	6	6	4	3	3	17	17	1
AT1G04170.1	| eukaryotic translation initiation factor 2 gamma subunit | Chr1:1097423-1099702 FORWARD LENGTH=465 | 201606	51 kDa			2	1	2	2		1	2	3	4	4	1
AT1G04980.1	| PDI-like 2-2 | Chr1:1413869-1416120 REVERSE LENGTH=447 | 201606	48 kDa			2	2		2	2		2	2	4	4	1
AT1G05240.1	| Peroxidase superfamily protein | Chr1:1521202-1522447 FORWARD LENGTH=325 | 201606	36 kDa	3	3							1	1	3	3	1
AT1G08980.1	| amidase 1 | Chr1:2884455-2886430 FORWARD LENGTH=425 | 201606	45 kDa			2	2	2	3	3	2	3	3	7	7	1
AT1G09490.1	| NAD(P)-binding Rossmann-fold superfamily protein | Chr1:3064172-3065815 FORWARD LENGTH=322 | 201606	36 kDa			3	6	8	6	4	3	3	3	15	15	1
AT1G10670.1	| ATP-citrate lyase A-1 | Chr1:3535787-3538098 FORWARD LENGTH=423 | 201606	47 kDa			6	5		7	6		2	2	12	12	1
AT1G16890.2	| ubiquitin-conjugating enzyme 36 | Chr1:5776550-5778327 REVERSE LENGTH=153 | 201606	17 kDa			2	6	6	4	6	4	3	3	14	14	1
AT1G18540.1	| Ribosomal protein L6 family protein | Chr1:6377448-6378548 REVERSE LENGTH=233 | 201606	26 kDa	4	9			2	2	5		3	2	11	11	1
AT1G22300.1	| general regulatory factor 10 | Chr1:7879146-7881103 REVERSE LENGTH=254 | 201606	29 kDa	2		2	4	4	3	1	2	4	3	9	9	1
AT1G22360.1	| UDP-glucosyl transferase 85A2 | Chr1:7895068-7897527 REVERSE LENGTH=481 | 201606	54 kDa			8	5	8	12	5	4	3	3	21	21	1
AT1G27450.1	| adenine phosphoribosyl transferase 1 | Chr1:9532042-9533807 FORWARD LENGTH=243 | 201606	26 kDa	2	1	1	2	2	3	1		4	3	6	6	1
AT1G30230.1	| translation elongation factor EF1B/ribosomal protein S6 family protein | Chr1:10639286-10640515 FORWARD LENGTH=231 | 201606	25 kDa		2	2		3	4	2	1	3	3	7	7	1
AT1G31230.1	| aspartate kinase-homoserine dehydrogenase i | Chr1:11158744-11163055 REVERSE LENGTH=911 | 201606	99 kDa			3	6	4	4	5	2	3	3	12	12	1
AT1G31330.1	| photosystem I subunit F | Chr1:11215011-11215939 REVERSE LENGTH=221 | 201606	24 kDa	13	14	9	10	10	10	10	8	4	4	42	42	1
AT1G35580.1	| cytosolic invertase 1 | Chr1:13122460-13124808 REVERSE LENGTH=551 | 201606	63 kDa				1	5	4	1	1	2	3	6	6	1
AT1G35720.1	| annexin 1 | Chr1:13225304-13226939 FORWARD LENGTH=317 | 201606	36 kDa	7	1	17	20	20	23	18	18	4	4	62	62	1
AT1G54100.1	| aldehyde dehydrogenase 7B4 | Chr1:20195435-20198853 REVERSE LENGTH=508 | 201606	54 kDa			6	8	6	6	8	6	3	3	20	20	1
AT1G55450.1	| S-adenosyl-L-methionine-dependent methyltransferases superfamily protein | Chr1:20705274-20706825 REVERSE LENGTH=311 | 201606	34 kDa					1	3	2		2	1	3	3	1
AT1G56190.1	| Phosphoglycerate kinase family protein | Chr1:21028403-21030454 FORWARD LENGTH=478 | 201606	50 kDa			4	7	5	4	8	6	3	3	17	17	1
AT1G59610.1	| dynamin-like 3 | Chr1:21893413-21900780 FORWARD LENGTH=920 | 201606	100 kDa	2	3	1	3	1		2		4	2	6	6	1
AT1G61250.1	| secretory carrier 3 | Chr1:22586035-22588664 FORWARD LENGTH=289 | 201606	33 kDa				1	2	1	1	1	2	3	3	3	1
AT1G65220.1	| ARM repeat superfamily protein | Chr1:24226204-24228799 FORWARD LENGTH=411 | 201606	47 kDa	1				1	2			2	1	2	2	1
AT1G65980.1	| thioredoxin-dependent peroxidase 1 | Chr1:24559524-24560753 REVERSE LENGTH=162 | 201606	17 kDa	1				1	2	1	1	3	2	3	3	1
AT2G14610.1	| pathogenesis-related protein 1 | Chr2:6241944-6242429 REVERSE LENGTH=161 | 201606	18 kDa				3	4	5	5	1	2	3	9	9	1
AT2G14750.1	| APS kinase | Chr2:6314128-6315501 FORWARD LENGTH=276 | 201606	30 kDa			10	8	11	9	6	10	3	3	27	27	1
AT2G17130.1	| isocitrate dehydrogenase subunit 2 | Chr2:7461062-7462466 REVERSE LENGTH=367 | 201606	40 kDa			12	11	11	14	10	8	3	3	33	33	1
AT2G19590.1	| ACC oxidase 1 | Chr2:8476239-8477354 REVERSE LENGTH=310 | 201606	35 kDa			3	5	5	3	4	4	3	3	12	12	1
AT2G25450.1	| 2-oxoglutarate (2OG) and Fe(II)-dependent oxygenase superfamily protein | Chr2:10830286-10831563 REVERSE LENGTH=359 | 201606	40 kDa	3	1	20	19	18	19	15	17	4	4	56	56	1
AT2G26400.1	| acireductone dioxygenase 3 | Chr2:11232058-11233274 REVERSE LENGTH=199 | 201606	23 kDa			3	5	8	8	4	2	3	3	15	15	1
AT2G27730.1	| copper ion binding protein | Chr2:11820056-11820867 REVERSE LENGTH=113 | 201606	12 kDa	4	4	4	4	4	4	4	4	4	4	16	16	1
AT2G29350.1	| senescence-associated gene 13 | Chr2:12601036-12602222 FORWARD LENGTH=269 | 201606	29 kDa			6	7	8	6	4	5	3	3	18	18	1
AT2G31390.1	| pfkB-like carbohydrate kinase family protein | Chr2:13383635-13386116 REVERSE LENGTH=325 | 201606	35 kDa	2		2	2	2	2	2	4	4	3	8	8	1
AT2G36170.1	| 60S ribosomal protein L40-1 | Chr2:15172153-15173046 FORWARD LENGTH=128 | 201606	15 kDa	21	22	35	35	33	35	34	31	4	4	123	123	1
AT2G42600.1	| phosphoenolpyruvate carboxylase 2 | Chr2:17734541-17738679 REVERSE LENGTH=963 | 201606	110 kDa	1		22	23	20	23	18	15	4	3	61	61	1
AT2G45140.1	| plant VAP homolog 12 | Chr2:18611029-18612971 FORWARD LENGTH=239 | 201606	26 kDa			5	4	3	1		3	2	3	8	8	1
AT2G47970.1	| Nuclear pore localization protein NPL4 | Chr2:19629525-19630973 FORWARD LENGTH=413 | 201606	46 kDa				1	2	1			1	2	2	2	1
AT3G01920.2	| DHBP synthase RibB-like alpha/beta domain-containing protein | Chr3:317449-319001 FORWARD LENGTH=334 | 201606	37 kDa			1	2	2	2	1		3	2	4	4	1
AT3G04000.1	| NAD(P)-binding Rossmann-fold superfamily protein | Chr3:1035500-1036435 FORWARD LENGTH=272 | 201606	28 kDa			3	2	2	2	4	5	3	3	9	9	1
AT3G10850.1	| Metallo-hydrolase/oxidoreductase superfamily protein | Chr3:3397756-3399522 REVERSE LENGTH=258 | 201606	29 kDa			10	14	10	8	12	10	3	3	32	32	1
AT3G11200.1	| alfin-like 2 | Chr3:3508387-3510418 REVERSE LENGTH=246 | 201606	28 kDa			2	1	5	4		2	2	3	7	7	1
AT3G13460.1	| evolutionarily conserved C-terminal region 2 | Chr3:4385274-4388220 REVERSE LENGTH=667 | 201606	72 kDa	1	2	4	4	5	5	5	4	4	4	15	15	1
AT3G15360.1	| thioredoxin M-type 4 | Chr3:5188448-5189457 FORWARD LENGTH=193 | 201606	21 kDa	2	2	2	2	3	3	2	2	4	4	9	9	1
AT3G18740.1	| Ribosomal protein L7Ae/L30e/S12e/Gadd45 family protein | Chr3:6453437-6453870 FORWARD LENGTH=112 | 201606	12 kDa	4	4							1	1	4	4	1
AT3G19760.1	| eukaryotic initiation factor 4A-III | Chr3:6863790-6866242 FORWARD LENGTH=408 | 201606	46 kDa	1	1	21	20	20	24	16	13	4	4	58	58	1
AT3G20370.1	| TRAF-like family protein | Chr3:7105481-7107079 FORWARD LENGTH=379 | 201606	43 kDa	5	5	2	2	2	6	4		4	3	13	13	1
AT3G23750.1	| Leucine-rich repeat protein kinase family protein | Chr3:8558332-8561263 FORWARD LENGTH=928 | 201606	100 kDa	5	6			1				2	1	6	6	1
AT3G53430.1	| Ribosomal protein L11 family protein | Chr3:19809895-19810395 REVERSE LENGTH=166 | 201606	18 kDa	8	7	4	5	4	4	4	4	4	4	20	20	1
AT3G53580.1	| diaminopimelate epimerase family protein | Chr3:19864784-19866907 FORWARD LENGTH=362 | 201606	39 kDa			5	5	3	3	4	4	3	3	12	12	1
AT3G56130.1	| biotin/lipoyl attachment domain-containing protein | Chr3:20826852-20829007 FORWARD LENGTH=281 | 201606	30 kDa				2	3	2	2	1	2	3	5	5	1
AT3G59760.1	| O-acetylserine (thiol) lyase isoform C | Chr3:22072119-22075345 REVERSE LENGTH=433 | 201606	46 kDa			8	11	10	8	6	5	3	3	24	24	1
AT3G61470.1	| photosystem I light harvesting complex protein | Chr3:22745736-22747032 FORWARD LENGTH=257 | 201606	28 kDa	9	8		4	4	3	2		3	3	15	15	1
AT3G61820.1	| Eukaryotic aspartyl protease family protein | Chr3:22880074-22881525 REVERSE LENGTH=483 | 201606	51 kDa	3	3							1	1	3	3	1
AT3G62830.1	| NAD(P)-binding Rossmann-fold superfamily protein | Chr3:23232539-23235353 FORWARD LENGTH=445 | 201606	50 kDa	9	12	12	5	3	11	7	3	4	4	31	31	1
AT3G63260.1	| Protein kinase superfamily protein | Chr3:23373090-23374747 REVERSE LENGTH=391 | 201606	43 kDa			2	3	3	3	2	1	3	3	7	7	1
AT4G03280.1	| photosynthetic electron transfer C | Chr4:1440314-1441717 FORWARD LENGTH=229 | 201606	24 kDa	6	4	1	6	5	4	2		4	3	14	14	1
AT4G08280.2	| Thioredoxin superfamily protein | Chr4:5230321-5231196 FORWARD LENGTH=134 | 201606	15 kDa					2	3	1		2	1	3	3	1
AT4G11850.1	| phospholipase D gamma 1 | Chr4:7129352-7132937 REVERSE LENGTH=858 | 201606	96 kDa			19	14	11	15	15	16	3	3	45	45	1
AT4G14030.1	| selenium-binding protein 1 | Chr4:8098121-8100165 REVERSE LENGTH=490 | 201606	54 kDa	2		21	19	25	27	16	18	4	3	64	64	1
AT4G19710.2	| aspartate kinase-homoserine dehydrogenase ii | Chr4:10725229-10729536 FORWARD LENGTH=916 | 201606	100 kDa			2	4	1	2	3		3	2	6	6	1
AT4G19840.1	| phloem protein 2-A1 | Chr4:10774336-10775701 FORWARD LENGTH=246 | 201606	28 kDa	5	5	2	4	2	2	4	2	4	4	13	13	1
AT4G26010.2	| Peroxidase superfamily protein | Chr4:13200569-13201688 FORWARD LENGTH=338 | 201606	37 kDa	7	5	2	4	2	2	2	2	4	4	13	13	1
AT4G27090.1	| Ribosomal protein L14 | Chr4:13594104-13595187 REVERSE LENGTH=134 | 201606	16 kDa	7	7							1	1	7	7	1
AT4G27320.1	| Adenine nucleotide alpha hydrolases-like superfamily protein | Chr4:13678860-13680717 REVERSE LENGTH=260 | 201606	28 kDa			4	6	4	7	6	1	3	3	14	14	1
AT4G30000.1	| Dihydropterin pyrophosphokinase / Dihydropteroate synthase | Chr4:14670524-14672397 REVERSE LENGTH=554 | 201606	61 kDa			1	2	2	2	3	2	3	3	6	6	1
AT4G31120.1	| SHK1 binding protein 1 | Chr4:15132185-15136568 REVERSE LENGTH=642 | 201606	72 kDa			8	9	10	9	7	7	3	3	25	25	1
AT4G32640.1	| Sec23/Sec24 protein transport family protein | Chr4:15742661-15750424 FORWARD LENGTH=1080 | 201606	116 kDa			1	1	2	1		1	2	3	3	3	1
AT4G34460.1	| GTP binding protein beta 1 | Chr4:16477393-16479266 REVERSE LENGTH=377 | 201606	41 kDa				1	1	1	2	1	2	3	3	3	1
AT4G34890.1	| xanthine dehydrogenase 1 | Chr4:16618736-16624983 REVERSE LENGTH=1361 | 201606	149 kDa			8	7	6	10	8	5	3	3	22	22	1
AT4G37930.1	| serine transhydroxymethyltransferase 1 | Chr4:17831891-17834742 REVERSE LENGTH=517 | 201606	57 kDa	2	4	10	10	9	8	10	9	4	4	31	31	1
AT4G38680.1	| glycine rich protein 2 | Chr4:18072240-18072851 REVERSE LENGTH=203 | 201606	19 kDa	1	2	1	1	4	3	1	1	4	4	7	7	1
AT4G39090.1	| Papain family cysteine protease | Chr4:18215826-18217326 REVERSE LENGTH=368 | 201606	40 kDa	2					4	2		2	1	4	4	1
AT5G04140.1	| glutamate synthase 1 | Chr5:1130031-1138186 FORWARD LENGTH=1622 | 201606	177 kDa	2		1	2	2	3	2	2	4	3	7	7	1
AT5G05010.1	| clathrin adaptor complexes medium subunit family protein | Chr5:1477137-1479872 FORWARD LENGTH=527 | 201606	58 kDa	2	2	5	7	2	2	4	2	4	4	13	13	1
AT5G07350.2	| TUDOR-SN protein 1 | Chr5:2320021-2324892 REVERSE LENGTH=1007 | 201606	110 kDa	8	9			4			3	2	2	12	12	1
AT5G07470.1	| peptidemethionine sulfoxide reductase 3 | Chr5:2362760-2364286 REVERSE LENGTH=202 | 201606	23 kDa			4	2	3	5	3	3	3	3	10	10	1
AT5G10240.1	| asparagine synthetase 3 | Chr5:3212934-3216418 REVERSE LENGTH=578 | 201606	65 kDa			11	11	11	12	11	10	3	3	33	33	1
AT5G10450.1	| G-box regulating factor 6 | Chr5:3284452-3286261 REVERSE LENGTH=248 | 201606	28 kDa	3		3	2	4	6	1	3	4	3	11	11	1
AT5G11810.1	| rhomboid family protein | Chr5:3808739-3810440 FORWARD LENGTH=306 | 201606	33 kDa			3	2	3	2	2	4	3	3	8	8	1
AT5G11880.1	| Pyridoxal-dependent decarboxylase family protein | Chr5:3827806-3829942 REVERSE LENGTH=489 | 201606	54 kDa			1	4	2	3	4		3	2	7	7	1
AT5G13370.1	| Auxin-responsive GH3 family protein | Chr5:4286996-4289424 FORWARD LENGTH=595 | 201606	67 kDa			8	11	10	13	11	5	3	3	29	29	1
AT5G14040.1	| phosphate transporter 3%3B1 | Chr5:4531059-4532965 REVERSE LENGTH=375 | 201606	40 kDa	30	24	10	20	14	19	21	12	4	4	75	75	1
AT5G19140.2	| aluminum induced protein with YGL and LRDR motifs | Chr5:6423398-6425785 FORWARD LENGTH=222 | 201606	24 kDa			4	4	4	4	4	4	3	3	12	12	1
AT5G19220.1	| ADP glucose pyrophosphorylase large subunit 1 | Chr5:6463931-6466775 REVERSE LENGTH=522 | 201606	58 kDa			4	2	2	4	2	2	3	3	8	8	1
AT5G22630.1	| arogenate dehydratase 5 | Chr5:7524645-7525922 FORWARD LENGTH=425 | 201606	46 kDa			8	11	9	8	7	5	3	3	24	24	1
AT5G23060.1	| calcium sensing receptor | Chr5:7736760-7738412 REVERSE LENGTH=387 | 201606	41 kDa	9	6	27	32	27	27	29	27	4	4	92	92	1
AT5G24165.1	| hypothetical protein | Chr5:8188622-8189087 FORWARD LENGTH=75 | 201606	8 kDa			2	2	4	4	2	2	3	3	8	8	1
AT5G25250.1	| SPFH/Band 7/PHB domain-containing membrane-associated protein family | Chr5:8749774-8751430 FORWARD LENGTH=470 | 201606	52 kDa			2	2	2	4	4	2	3	3	8	8	1
AT5G30510.1	| ribosomal protein S1 | Chr5:11619262-11621223 REVERSE LENGTH=416 | 201606	45 kDa	4		2	5	4	6	4	3	4	3	14	14	1
AT5G33320.1	| Glucose-6-phosphate/phosphate translocator-like protein | Chr5:12588950-12591408 FORWARD LENGTH=408 | 201606	44 kDa	4	2		1		1			1	3	4	4	1
AT5G35790.1	| glucose-6-phosphate dehydrogenase 1 | Chr5:13956879-13959686 REVERSE LENGTH=576 | 201606	65 kDa			6	4	5	7	5	5	3	3	16	16	1
AT5G42980.1	| thioredoxin 3 | Chr5:17242772-17243718 FORWARD LENGTH=118 | 201606	13 kDa	7	2	4	6	8	10	7	8	4	4	26	26	1
AT5G44070.1	| phytochelatin synthase 1 (PCS1) | Chr5:17734876-17737672 FORWARD LENGTH=485 | 201606	54 kDa			19	18	16	19	14	12	3	3	49	49	1
AT5G46790.1	| PYR1-like 1 | Chr5:18984063-18984728 REVERSE LENGTH=221 | 201606	25 kDa			6	9	11	11	6	3	3	3	23	23	1
AT5G51820.1	| phosphoglucomutase | Chr5:21063531-21067933 REVERSE LENGTH=623 | 201606	68 kDa			9	9	6	9	7	4	3	3	22	22	1
AT5G52840.1	| NADH-ubiquinone oxidoreductase-like protein | Chr5:21413718-21414794 FORWARD LENGTH=169 | 201606	19 kDa			4	4	4	4	4	4	3	3	12	12	1
AT5G52960.1	| tRNA dimethylallyltransferase | Chr5:21477250-21478269 FORWARD LENGTH=170 | 201606	19 kDa			4	6	5	3	2	2	3	3	11	11	1
AT5G53480.1	| ARM repeat superfamily protein | Chr5:21714016-21716709 FORWARD LENGTH=870 | 201606	96 kDa			2	5	6	3	2	2	3	3	10	10	1
AT5G53530.1	| vacuolar protein sorting 26A | Chr5:21746275-21748156 REVERSE LENGTH=302 | 201606	35 kDa			2	4	3	2	4	3	3	3	9	9	1
AT5G54600.1	| Translation protein SH3-like family protein | Chr5:22183046-22184403 FORWARD LENGTH=198 | 201606	22 kDa		1	3	2					1	2	3	3	1
AT5G55530.1	| Calcium-dependent lipid-binding (CaLB domain) family protein | Chr5:22494439-22495656 FORWARD LENGTH=405 | 201606	44 kDa			1		2	3	3	3	3	2	6	6	1
AT5G58490.1	| NAD(P)-binding Rossmann-fold superfamily protein | Chr5:23643068-23644455 FORWARD LENGTH=324 | 201606	36 kDa			6	6	4	6	4	2	3	3	14	14	1
AT5G60710.1	| Zinc finger (C3HC4-type RING finger) family protein | Chr5:24410953-24414849 REVERSE LENGTH=704 | 201606	76 kDa	13	14	1		2	3	2	1	4	3	18	18	1
AT5G62790.1	| 1-deoxy-D-xylulose 5-phosphate reductoisomerase | Chr5:25214358-25217292 REVERSE LENGTH=477 | 201606	52 kDa	3		6	10	12	10	7	8	4	3	28	28	1
AT5G63570.1	| glutamate-1-semialdehyde-2%2C1-aminomutase | Chr5:25451957-25453620 FORWARD LENGTH=474 | 201606	50 kDa			3	2	1	2	2	2	3	3	6	6	1
AT5G66910.1	| Disease resistance protein (CC-NBS-LRR class) family | Chr5:26718338-26721133 REVERSE LENGTH=815 | 201606	93 kDa	33	33							1	1	33	33	1
ATCG00480.1	| ATP synthase subunit beta | ChrC:52660-54156 REVERSE LENGTH=498 | 201606	54 kDa	91	79	96	110	105	103	103	103	4	4	395	395	1
AT4G20360.1	| RAB GTPase homolog E1B | Chr4:10990036-10991466 FORWARD LENGTH=476 | 201606	52 kDa	57	59	63	61	64	60	65	68	4	4	249	248	0.995984
AT5G44340.1	| tubulin beta chain 4 | Chr5:17859442-17860994 REVERSE LENGTH=444 | 201606	50 kDa	52	57	53	60	65	61	63	53	4	4	233	231	0.991416
AT5G03300.1	| adenosine kinase 2 | Chr5:796573-798997 FORWARD LENGTH=345 | 201606	38 kDa	2	2	34	43	37	33	36	30	4	4	109	108	0.990826
AT2G33150.1	| peroxisomal 3-ketoacyl-CoA thiolase 3 | Chr2:14047814-14050983 REVERSE LENGTH=462 | 201606	49 kDa	2		32	37	39	35	32	32	4	3	105	104	0.990476
AT2G39730.1	| rubisco activase | Chr2:16570951-16573345 REVERSE LENGTH=474 | 201606	52 kDa	128	119	71	88	100	91	87	83	4	4	386	381	0.987047
AT4G35260.1	| isocitrate dehydrogenase 1 | Chr4:16774494-16776233 REVERSE LENGTH=367 | 201606	40 kDa			23	25	23	25	21	16	3	3	67	66	0.985075
AT1G29910.1	| chlorophyll A/B binding protein 3 | Chr1:10472443-10473246 REVERSE LENGTH=267 | 201606	28 kDa	36	26	27	37	32	36	35	29	4	4	130	128	0.984615
AT5G14740.2	| carbonic anhydrase 2 | Chr5:4760536-4762382 FORWARD LENGTH=259 | 201606	28 kDa	16	11	17	17	16	20	16	16	4	4	65	64	0.984615
AT1G80460.1	| Actin-like ATPase superfamily protein | Chr1:30246960-30249055 REVERSE LENGTH=522 | 201606	56 kDa			20	20	27	22	16	20	3	3	63	62	0.984127
AT1G02500.1	| S-adenosylmethionine synthetase 1 | Chr1:519037-520218 FORWARD LENGTH=393 | 201606	43 kDa	11	16	36	36	40	38	37	32	4	4	124	122	0.983871
AT5G42270.1	| FtsH extracellular protease family | Chr5:16902659-16905102 FORWARD LENGTH=704 | 201606	75 kDa	16	10	12	17	14	19	19	14	4	4	61	60	0.983607
AT5G62690.1	| tubulin beta chain 2 | Chr5:25181560-25183501 FORWARD LENGTH=450 | 201606	51 kDa	57	53	57	58	60	66	63	56	4	4	237	233	0.983122
AT4G34200.1	| D-3-phosphoglycerate dehydrogenase | Chr4:16374041-16376561 REVERSE LENGTH=603 | 201606	63 kDa	1		55	51	51	56	51	48	4	3	158	155	0.981013
AT5G56010.1	| heat shock protein 81-3 | Chr5:22681410-22683911 FORWARD LENGTH=699 | 201606	80 kDa	11	7	12	16	17	17	12	11	4	4	52	51	0.980769
AT5G09590.1	| mitochondrial HSO70 2 | Chr5:2975721-2978508 FORWARD LENGTH=682 | 201606	73 kDa	8	5	14	19	14	16	13	8	4	4	49	48	0.979592
AT1G79530.1	| glyceraldehyde-3-phosphate dehydrogenase of plastid 1 | Chr1:29916232-29919088 REVERSE LENGTH=422 | 201606	45 kDa	2		14	14	14	20	18	13	4	3	48	47	0.979167
AT1G48860.1	| RNA 3'-terminal phosphate cyclase/enolpyruvate transferase%2C alpha/beta | Chr1:18068892-18071331 REVERSE LENGTH=521 | 201606	56 kDa			14	17	14	18	18	10	3	3	46	45	0.978261
AT4G29130.1	| hexokinase 1 | Chr4:14352338-14354865 REVERSE LENGTH=496 | 201606	54 kDa	5	2	15	14	9	16	17	13	4	4	46	45	0.978261
AT5G02490.1	| Heat shock protein 70 (Hsp 70) family protein | Chr5:550296-552565 REVERSE LENGTH=653 | 201606	71 kDa	42	38	61	60	62	68	63	57	4	4	228	223	0.97807
AT3G09440.1	| Heat shock protein 70 (Hsp 70) family protein | Chr3:2903434-2905632 REVERSE LENGTH=649 | 201606	71 kDa	48	43	71	69	72	79	77	71	4	4	268	262	0.977612
AT3G54050.1	| high cyclic electron flow 1 | Chr3:20016951-20018527 FORWARD LENGTH=417 | 201606	45 kDa	11	12	23	29	27	25	28	21	4	4	89	87	0.977528
AT2G21660.1	| cold%2C circadian rhythm%2C and rna binding 2 | Chr2:9265477-9266316 REVERSE LENGTH=176 | 201606	17 kDa	8	4	8	15	14	12	14	12	4	4	44	43	0.977273
AT5G65720.1	| nitrogen fixation S (NIFS)-like 1 | Chr5:26296349-26297710 FORWARD LENGTH=453 | 201606	50 kDa	4	1	11	12	15	19	14	11	4	4	44	43	0.977273
AT5G54960.1	| pyruvate decarboxylase-2 | Chr5:22310858-22312681 REVERSE LENGTH=607 | 201606	66 kDa	2		27	28	32	33	26	24	4	3	87	85	0.977011
AT2G05710.1	| aconitase 3 | Chr2:2141591-2146350 FORWARD LENGTH=990 | 201606	108 kDa			18	15	14	16	11	11	3	3	43	42	0.976744
AT2G19570.1	| cytidine deaminase 1 | Chr2:8470598-8471503 REVERSE LENGTH=301 | 201606	33 kDa			12	11	18	18	13	13	3	3	43	42	0.976744
AT2G32920.1	| PDI-like 2-3 | Chr2:13962502-13965406 REVERSE LENGTH=440 | 201606	48 kDa			25	22	34	32	27	30	3	3	86	84	0.976744
AT1G53310.1	| phosphoenolpyruvate carboxylase 1 | Chr1:19884261-19888070 REVERSE LENGTH=967 | 201606	110 kDa	6	2	40	44	45	47	36	31	4	4	127	124	0.976378
AT2G29550.1	| tubulin beta-7 chain | Chr2:12644258-12645932 REVERSE LENGTH=449 | 201606	51 kDa	51	48	45	52	52	55	54	42	4	4	202	197	0.975248
AT3G45140.1	| lipoxygenase 2 | Chr3:16525437-16529233 FORWARD LENGTH=896 | 201606	102 kDa	18	8	93	99	102	105	106	99	4	4	319	311	0.974922
AT5G28540.1	| heat shock protein 70 (Hsp 70) family protein | Chr5:10540665-10543274 REVERSE LENGTH=669 | 201606	74 kDa	89	83	95	93	98	102	101	95	4	4	383	373	0.97389
AT2G41840.1	| Ribosomal protein S5 family protein | Chr2:17460016-17461398 REVERSE LENGTH=285 | 201606	31 kDa	10	9	9	12	11	8	8	8	4	4	38	37	0.973684
AT1G32500.1	| non-intrinsic ABC protein 6 | Chr1:11750091-11751994 REVERSE LENGTH=475 | 201606	53 kDa	4	4	10	9	12	12	11	11	4	4	37	36	0.972973
AT2G21390.1	| Coatomer%2C alpha subunit | Chr2:9152428-9156577 FORWARD LENGTH=1218 | 201606	136 kDa	9	8	12	15	8	8	8	5	4	4	37	36	0.972973
AT1G51980.1	| Insulinase (Peptidase family M16) protein | Chr1:19323692-19326771 REVERSE LENGTH=503 | 201606	54 kDa	2	2	12	13	11	9	11	11	4	4	36	35	0.972222
AT1G33120.1	| Ribosomal protein L6 family | Chr1:12010986-12012223 FORWARD LENGTH=194 | 201606	22 kDa	31	24	10	13	15	14	13	16	4	4	69	67	0.971014
AT4G01070.1	| UDP-Glycosyltransferase superfamily protein | Chr4:461858-463300 REVERSE LENGTH=480 | 201606	53 kDa			22	23	23	21	24	23	3	3	69	67	0.971014
AT1G15690.1	| Inorganic H pyrophosphatase family protein | Chr1:5399115-5402185 FORWARD LENGTH=770 | 201606	81 kDa	20	19	15	16	17	16	16	15	4	4	68	66	0.970588
AT4G25130.1	| peptide met sulfoxide reductase 4 | Chr4:12898802-12899998 REVERSE LENGTH=258 | 201606	29 kDa	8	4	9	10	8	10	9	9	4	4	34	33	0.970588
AT3G08590.1	| Phosphoglycerate mutase%2C 2%2C3-bisphosphoglycerate-independent | Chr3:2608683-2611237 REVERSE LENGTH=560 | 201606	61 kDa	2	2	45	46	46	45	42	38	4	4	135	131	0.97037
AT1G78900.1	| vacuolar ATP synthase subunit A | Chr1:29660463-29664575 FORWARD LENGTH=623 | 201606	69 kDa	18	21	24	26	28	27	30	23	4	4	100	97	0.97
AT3G44310.1	| nitrilase 1 | Chr3:15986901-15988841 FORWARD LENGTH=346 | 201606	38 kDa	15	13	44	37	36	41	37	37	4	4	132	128	0.969697
AT1G07920.1	| GTP binding Elongation factor Tu family protein | Chr1:2455559-2457001 FORWARD LENGTH=449 | 201606	50 kDa	39	31	72	71	75	73	75	78	4	4	261	253	0.969349
AT2G34420.1	| photosystem II light harvesting complex protein B1B2 | Chr2:14522716-14523513 REVERSE LENGTH=265 | 201606	28 kDa	35	26	27	35	32	35	35	29	4	4	129	125	0.968992
AT3G14990.1	| Class I glutamine amidotransferase-like superfamily protein | Chr3:5047510-5049621 FORWARD LENGTH=392 | 201606	42 kDa	14	5	42	56	50	50	54	44	4	4	160	155	0.96875
AT5G42020.1	| Heat shock protein 70 (Hsp 70) family protein | Chr5:16807697-16810480 REVERSE LENGTH=668 | 201606	74 kDa	91	81	89	90	95	97	97	92	4	4	372	360	0.967742
AT1G78570.1	| rhamnose biosynthesis 1 | Chr1:29550110-29552207 FORWARD LENGTH=669 | 201606	75 kDa	8	6	19	16	18	22	16	15	4	4	61	59	0.967213
AT2G31610.1	| Ribosomal protein S3 family protein | Chr2:13450384-13451669 FORWARD LENGTH=250 | 201606	28 kDa	32	40	15	9	9	5	4	4	4	4	60	58	0.966667
AT3G02530.1	| TCP-1/cpn60 chaperonin family protein | Chr3:528806-532457 REVERSE LENGTH=535 | 201606	59 kDa	4	2	16	20	18	21	22	15	4	4	60	58	0.966667
AT3G53610.1	| RAB GTPase homolog 8 | Chr3:19876531-19878264 REVERSE LENGTH=216 | 201606	24 kDa	5	5	6	10	10	9	9	5	4	4	30	29	0.966667
AT1G71500.1	| Rieske (2Fe-2S) domain-containing protein | Chr1:26936084-26937331 FORWARD LENGTH=287 | 201606	32 kDa	7	10	6	6	8	8	8	4	4	4	29	28	0.965517
AT4G24190.1	| Chaperone protein htpG family protein | Chr4:12551902-12555851 REVERSE LENGTH=823 | 201606	94 kDa	1		9	10	11	12	8	6	4	3	29	28	0.965517
AT4G39260.1	| cold%2C circadian rhythm%2C and RNA binding 1 | Chr4:18274166-18274958 REVERSE LENGTH=169 | 201606	17 kDa		1	10	8	11	9	8	10	3	4	29	28	0.965517
AT2G07698.1	| ATPase%2C F1 complex%2C alpha subunit protein | Chr2:3361474-3364028 FORWARD LENGTH=777 | 201606	86 kDa	31	21	41	49	32	35	38	32	4	4	142	137	0.964789
AT2G45640.1	| SIN3 associated polypeptide P18 | Chr2:18799881-18801323 REVERSE LENGTH=152 | 201606	17 kDa			11	9	10	12	7	6	3	3	28	27	0.964286
AT3G26650.1	| glyceraldehyde 3-phosphate dehydrogenase A subunit | Chr3:9795226-9796848 FORWARD LENGTH=396 | 201606	42 kDa	33	24	50	53	47	55	60	51	4	4	190	183	0.963158
AT5G46800.1	| Mitochondrial substrate carrier family protein | Chr5:18988779-18989810 REVERSE LENGTH=300 | 201606	31 kDa	8	5	5	6	9	8	5	7	4	4	27	26	0.962963
ATCG00120.1	| ATP synthase subunit alpha | ChrC:9938-11461 REVERSE LENGTH=507 | 201606	55 kDa	60	52	50	54	49	52	54	47	4	4	213	205	0.962441
AT5G38830.1	| Cysteinyl-tRNA synthetase%2C class Ia family protein | Chr5:15545764-15548094 REVERSE LENGTH=511 | 201606	58 kDa			9	8	9	9	8	8	3	3	26	25	0.961538
AT1G17100.1	| SOUL heme-binding family protein | Chr1:5844766-5845539 FORWARD LENGTH=232 | 201606	25 kDa			28	26	26	25	22	22	3	3	76	73	0.960526
AT2G45810.1	| DEA(D/H)-box RNA helicase family protein | Chr2:18859836-18862318 FORWARD LENGTH=528 | 201606	60 kDa			15	20	19	17	16	11	3	3	50	48	0.96
AT4G30310.2	| FGGY family of carbohydrate kinase | Chr4:14831913-14835092 FORWARD LENGTH=579 | 201606	63 kDa			10	9	6	8	9	7	3	3	25	24	0.96
AT1G62380.1	| ACC oxidase 2 | Chr1:23082340-23084068 FORWARD LENGTH=320 | 201606	36 kDa			26	27	22	22	24	20	3	3	72	69	0.958333
AT3G14310.1	| pectin methylesterase 3 | Chr3:4772214-4775095 REVERSE LENGTH=592 | 201606	64 kDa	4		7	8	7	9	6	6	4	3	24	23	0.958333
AT1G22780.1	| Ribosomal protein S13/S18 family | Chr1:8067990-8069163 FORWARD LENGTH=152 | 201606	18 kDa	17	19	18	19	18	18	18	12	4	4	71	68	0.957746
AT1G04410.1	| Lactate/malate dehydrogenase family protein | Chr1:1189418-1191267 REVERSE LENGTH=332 | 201606	36 kDa	6	2	33	39	39	39	40	33	4	4	118	113	0.957627
AT4G14960.2	| Tubulin/FtsZ family protein | Chr4:8548769-8550319 REVERSE LENGTH=450 | 201606	50 kDa	33	31	20	26	32	27	27	23	4	4	112	107	0.955357
AT4G14716.1	| acireductone dioxygenase 1 | Chr4:8430484-8431867 REVERSE LENGTH=192 | 201606	23 kDa			9	7	7	9	6	5	3	3	22	21	0.954545
AT1G24510.1	| TCP-1/cpn60 chaperonin family protein | Chr1:8685504-8688101 REVERSE LENGTH=535 | 201606	59 kDa			22	27	22	21	21	14	3	3	65	62	0.953846
AT5G10860.1	| Cystathionine beta-synthase (CBS) family protein | Chr5:3429173-3430142 REVERSE LENGTH=206 | 201606	23 kDa			9	4	5	9	7	7	3	3	21	20	0.952381
AT1G07890.1	| ascorbate peroxidase 1 | Chr1:2438005-2439435 FORWARD LENGTH=250 | 201606	28 kDa	10	10	65	59	54	56	58	53	4	4	187	178	0.951872
AT3G12580.1	| heat shock protein 70 | Chr3:3991487-3993689 REVERSE LENGTH=650 | 201606	71 kDa	40	34	49	45	48	53	48	44	4	4	185	176	0.951351
AT3G46970.1	| alpha-glucan phosphorylase 2 | Chr3:17301625-17306111 REVERSE LENGTH=841 | 201606	95 kDa			16	15	10	17	15	7	3	3	41	39	0.95122
AT4G10340.1	| light harvesting complex of photosystem II 5 | Chr4:6408200-6409496 FORWARD LENGTH=280 | 201606	30 kDa	43	33	26	30	25	27	28	26	4	4	122	116	0.95082
AT1G72370.1	| 40s ribosomal protein SA | Chr1:27243148-27244842 REVERSE LENGTH=298 | 201606	32 kDa	15	14	30	30	31	28	25	24	4	4	101	96	0.950495
AT3G22890.1	| ATP sulfurylase 1 | Chr3:8112837-8114734 FORWARD LENGTH=463 | 201606	51 kDa	1		12	16	13	12	14	10	4	3	40	38	0.95
AT3G11830.1	| TCP-1/cpn60 chaperonin family protein | Chr3:3732734-3736156 FORWARD LENGTH=557 | 201606	60 kDa	2		18	17	20	20	18	18	4	3	58	55	0.948276
AT1G79930.1	| heat shock protein 91 | Chr1:30063781-30067067 REVERSE LENGTH=831 | 201606	92 kDa			35	27	30	36	30	27	3	3	95	90	0.947368
AT3G53420.1	| plasma membrane intrinsic protein 2A | Chr3:19803906-19805454 REVERSE LENGTH=287 | 201606	30 kDa	13	9	9	7	8	10	8	10	4	4	38	36	0.947368
AT4G20850.1	| tripeptidyl peptidase ii | Chr4:11160935-11169889 REVERSE LENGTH=1380 | 201606	152 kDa	4	2	65	73	81	86	76	53	4	4	226	214	0.946903
AT4G20890.1	| tubulin beta-9 chain | Chr4:11182218-11183840 FORWARD LENGTH=444 | 201606	50 kDa	48	48	51	58	62	57	62	48	4	4	223	211	0.946188
AT4G01370.1	| MAP kinase 4 | Chr4:567219-568889 FORWARD LENGTH=376 | 201606	43 kDa			13	15	18	23	24	14	3	3	55	52	0.945455
AT3G13920.1	| eukaryotic translation initiation factor 4A1 | Chr3:4592635-4594128 REVERSE LENGTH=412 | 201606	47 kDa	35	34	53	53	56	55	57	48	4	4	201	190	0.945274
AT4G21470.1	| riboflavin kinase/FMN hydrolase | Chr4:11431284-11433197 FORWARD LENGTH=379 | 201606	42 kDa			14	11	12	12	10	11	3	3	36	34	0.944444
AT5G65010.1	| asparagine synthetase 2 | Chr5:25969224-25972278 FORWARD LENGTH=578 | 201606	65 kDa			23	25	26	24	22	18	3	3	71	67	0.943662
AT3G07720.1	| Galactose oxidase/kelch repeat superfamily protein | Chr3:2465439-2467033 FORWARD LENGTH=329 | 201606	36 kDa			13	12	10	14	12	7	3	3	35	33	0.942857
AT4G34230.1	| cinnamyl alcohol dehydrogenase 5 | Chr4:16386898-16388666 REVERSE LENGTH=357 | 201606	39 kDa			12	12	13	14	10	7	3	3	35	33	0.942857
AT4G08850.1	| Leucine-rich repeat receptor-like protein kinase family protein | Chr4:5636693-5640496 REVERSE LENGTH=1045 | 201606	115 kDa	14	6	9	15	13	14	16	14	4	4	52	49	0.942308
AT5G66760.1	| succinate dehydrogenase 1-1 | Chr5:26653776-26657224 FORWARD LENGTH=634 | 201606	70 kDa		1	32	35	35	34	36	27	3	4	103	97	0.941748
AT1G27400.1	| Ribosomal protein L22p/L17e family protein | Chr1:9515230-9516725 FORWARD LENGTH=176 | 201606	20 kDa	8	9	3	3	4	2	2	2	4	4	17	16	0.941176
AT4G15560.1	| Deoxyxylulose-5-phosphate synthase | Chr4:8884218-8887254 FORWARD LENGTH=717 | 201606	77 kDa			5	5	7	6	5	5	3	3	17	16	0.941176
AT4G18480.1	| P-loop containing nucleoside triphosphate hydrolases superfamily protein | Chr4:10201897-10203361 REVERSE LENGTH=424 | 201606	46 kDa			11	15	9	9	14	8	3	3	34	32	0.941176
AT5G45750.1	| RAB GTPase homolog A1C | Chr5:18559318-18560639 FORWARD LENGTH=216 | 201606	24 kDa	7	6		5	6		4	5	3	3	17	16	0.941176
AT1G35670.1	| calcium-dependent protein kinase 2 | Chr1:13205456-13208058 FORWARD LENGTH=495 | 201606	56 kDa			8	12	13	9	12	10	3	3	33	31	0.939394
AT2G38230.1	| pyridoxine biosynthesis 1.1 | Chr2:16011475-16012404 FORWARD LENGTH=309 | 201606	33 kDa			11	10	8	12	14	9	3	3	33	31	0.939394
AT5G01530.1	| light harvesting complex photosystem II | Chr5:209084-210243 FORWARD LENGTH=290 | 201606	31 kDa	25	20	18	19	18	16	20	21	4	4	81	76	0.938272
ATCG00270.1	| photosystem II reaction center protein D | ChrC:32711-33772 FORWARD LENGTH=353 | 201606	40 kDa	11	9	6	8	7	8	8	5	4	4	32	30	0.9375
AT2G40100.1	| light harvesting complex photosystem II | Chr2:16745884-16747190 FORWARD LENGTH=276 | 201606	30 kDa	12	8	5	7	6	9	8	5	4	4	31	29	0.935484
AT5G08590.1	| SNF1-related protein kinase 2.1 | Chr5:2783537-2785869 FORWARD LENGTH=353 | 201606	40 kDa			14	10	8	9	9	10	3	3	31	29	0.935484
AT1G20010.1	| tubulin beta-5 chain | Chr1:6938033-6940481 REVERSE LENGTH=449 | 201606	50 kDa	50	48	52	51	57	57	57	46	4	4	216	202	0.935185
AT5G17380.1	| Thiamine pyrophosphate dependent pyruvate decarboxylase family protein | Chr5:5724920-5726720 REVERSE LENGTH=572 | 201606	61 kDa			58	59	68	63	58	50	3	3	184	172	0.934783
AT1G09780.1	| Phosphoglycerate mutase%2C 2%2C3-bisphosphoglycerate-independent | Chr1:3165550-3167812 REVERSE LENGTH=557 | 201606	61 kDa	1		70	70	76	70	63	56	4	3	210	196	0.933333
AT1G61520.1	| PSI type III chlorophyll a/b-binding protein | Chr1:22700152-22701149 FORWARD LENGTH=273 | 201606	29 kDa	30	27	16	19	20	20	24	18	4	4	90	84	0.933333
AT2G38750.1	| annexin 4 | Chr2:16196582-16198431 REVERSE LENGTH=319 | 201606	36 kDa	2	2	4	4	5	4	4	4	4	4	15	14	0.933333
AT3G44870.1	| S-adenosyl-L-methionine-dependent methyltransferases superfamily protein | Chr3:16382277-16383605 FORWARD LENGTH=379 | 201606	42 kDa			5	4	5	5	5	5	3	3	15	14	0.933333
AT4G35250.1	| NAD(P)-binding Rossmann-fold superfamily protein | Chr4:16771401-16773269 REVERSE LENGTH=395 | 201606	44 kDa	3	7	3	4	4	1	5	2	4	4	15	14	0.933333
AT5G15650.1	| reversibly glycosylated polypeptide 2 | Chr5:5092203-5094093 FORWARD LENGTH=360 | 201606	41 kDa			7	9	12	11	11	8	3	3	30	28	0.933333
AT5G17990.1	| tryptophan biosynthesis 1 | Chr5:5957330-5959681 FORWARD LENGTH=444 | 201606	47 kDa	2		4	4	5	5	4	5	4	3	15	14	0.933333
AT1G56070.1	| Ribosomal protein S5/Elongation factor G/III/V family protein | Chr1:20968245-20971077 REVERSE LENGTH=843 | 201606	94 kDa	29	20	146	136	145	151	143	125	4	4	463	432	0.933045
AT5G12250.1	| beta-6 tubulin | Chr5:3961317-3962971 REVERSE LENGTH=449 | 201606	51 kDa	49	44	45	45	50	52	49	39	4	4	193	180	0.932642
AT1G06290.1	| acyl-CoA oxidase 3 | Chr1:1922423-1926002 FORWARD LENGTH=675 | 201606	76 kDa			8	11	11	11	10	5	3	3	29	27	0.931034
AT2G20610.1	| Tyrosine transaminase family protein | Chr2:8878150-8880298 REVERSE LENGTH=462 | 201606	51 kDa			20	19	24	22	14	13	3	3	58	54	0.931034
AT3G02090.1	| Insulinase (Peptidase family M16) protein | Chr3:365624-368526 FORWARD LENGTH=531 | 201606	59 kDa	31	21	26	36	41	37	43	37	4	4	141	131	0.929078
AT1G20620.1	| catalase 3 | Chr1:7143142-7146193 FORWARD LENGTH=492 | 201606	57 kDa	39	30	85	87	96	93	88	76	4	4	308	286	0.928571
AT1G23490.1	| ADP-ribosylation factor 1 | Chr1:8337232-8338373 FORWARD LENGTH=181 | 201606	21 kDa	30	34	12	10	11	4	3	4	4	4	56	52	0.928571
AT5G20890.1	| TCP-1/cpn60 chaperonin family protein | Chr5:7087020-7089906 REVERSE LENGTH=527 | 201606	57 kDa	1		17	16	20	20	17	15	4	3	55	51	0.927273
AT5G17920.1	| Cobalamin-independent synthase family protein | Chr5:5935771-5939195 FORWARD LENGTH=765 | 201606	84 kDa	48	30	104	99	108	112	106	98	4	4	366	339	0.92623
AT1G64190.1	| 6-phosphogluconate dehydrogenase family protein | Chr1:23825549-23827012 REVERSE LENGTH=487 | 201606	53 kDa			8	5	7	9	12	11	3	3	27	25	0.925926
AT2G37500.1	| arginine biosynthesis protein ArgJ family | Chr2:15739904-15742689 REVERSE LENGTH=468 | 201606	49 kDa			11	9	8	10	8	6	3	3	27	25	0.925926
AT1G12000.1	| Phosphofructokinase family protein | Chr1:4050159-4053727 REVERSE LENGTH=566 | 201606	61 kDa	2		11	14	13	11	14	12	4	3	40	37	0.925
AT3G02360.1	| 6-phosphogluconate dehydrogenase family protein | Chr3:482498-483958 FORWARD LENGTH=486 | 201606	54 kDa	2		9	7	6	7	9	10	4	3	26	24	0.923077
AT5G48230.2	| acetoacetyl-CoA thiolase 2 | Chr5:19552570-19555122 REVERSE LENGTH=403 | 201606	41 kDa			4	5	5	3	4	4	3	3	13	12	0.923077
AT4G39980.1	| 3-deoxy-D-arabino-heptulosonate 7-phosphate synthase 1 | Chr4:18539654-18541832 FORWARD LENGTH=525 | 201606	58 kDa	10	8	31	33	32	30	30	24	4	4	103	95	0.92233
ATCG00490.1	| ribulose-bisphosphate carboxylase | ChrC:54958-56397 FORWARD LENGTH=479 | 201606	53 kDa	92	78	70	77	70	74	83	61	4	4	315	290	0.920635
AT1G02170.1	| metacaspase 1 | Chr1:411883-413426 FORWARD LENGTH=367 | 201606	40 kDa			6	7	8	10	11	6	3	3	25	23	0.92
AT1G79920.1	| Heat shock protein 70 (Hsp 70) family protein | Chr1:30059302-30062224 REVERSE LENGTH=736 | 201606	82 kDa			30	22	22	26	23	21	3	3	75	69	0.92
AT2G01140.1	| Aldolase superfamily protein | Chr2:95006-96491 REVERSE LENGTH=391 | 201606	42 kDa	2		7	11	9	8	7	4	4	3	25	23	0.92
AT4G37800.1	| xyloglucan endotransglucosylase/hydrolase 7 | Chr4:17775703-17777372 REVERSE LENGTH=293 | 201606	34 kDa	21	19		2	2	2	2		3	3	25	23	0.92
AT1G62020.1	| Coatomer%2C alpha subunit | Chr1:22919814-22923728 FORWARD LENGTH=1216 | 201606	137 kDa	10	9	10	10	7	8	10	7	4	4	37	34	0.918919
AT3G01290.1	| SPFH/Band 7/PHB domain-containing membrane-associated protein family | Chr3:88252-89356 REVERSE LENGTH=285 | 201606	31 kDa	10	6	20	22	21	21	23	19	4	4	74	68	0.918919
AT1G59900.1	| pyruvate dehydrogenase complex E1 alpha subunit | Chr1:22051368-22053660 FORWARD LENGTH=389 | 201606	43 kDa			19	18	15	14	15	13	3	3	49	45	0.918367
AT2G43910.1	| HARMLESS TO OZONE LAYER 1 | Chr2:18184658-18186951 REVERSE LENGTH=227 | 201606	25 kDa			17	16	16	16	16	13	3	3	49	45	0.918367
AT2G28000.1	| chaperonin-60alpha | Chr2:11926603-11929184 FORWARD LENGTH=586 | 201606	62 kDa	11	6	31	32	37	33	31	30	4	4	110	101	0.918182
AT1G23310.1	| glutamate:glyoxylate aminotransferase | Chr1:8268720-8271329 REVERSE LENGTH=481 | 201606	53 kDa	5		18	21	21	18	16	16	4	3	60	55	0.916667
AT2G03680.1	| spiral1 | Chr2:1121398-1121850 FORWARD LENGTH=119 | 201606	12 kDa			4	3	5	5	3	3	3	3	12	11	0.916667
AT3G08030.1	| DNA-directed RNA polymerase subunit beta (Protein of unknown function%2C DUF642) | Chr3:2564191-2565819 FORWARD LENGTH=365 | 201606	39 kDa	12	11							1	1	12	11	0.916667
AT3G52730.1	| ubiquinol-cytochrome C reductase UQCRX/QCR9-like family protein | Chr3:19543146-19544167 REVERSE LENGTH=72 | 201606	8 kDa	6	6	6	5	6	6	6	5	4	4	24	22	0.916667
AT1G18500.1	| methylthioalkylmalate synthase-like 4 | Chr1:6369347-6372861 FORWARD LENGTH=631 | 201606	69 kDa	1	2	19	21	22	17	17	14	4	4	59	54	0.915254
AT4G24280.1	| chloroplast heat shock protein 70-1 | Chr4:12590094-12593437 FORWARD LENGTH=718 | 201606	77 kDa	29	24	37	33	36	36	39	36	4	4	141	129	0.914894
AT3G03960.1	| TCP-1/cpn60 chaperonin family protein | Chr3:1024432-1027604 FORWARD LENGTH=549 | 201606	59 kDa	2	2	22	24	27	27	31	22	4	4	82	75	0.914634
AT3G22850.1	| aluminum induced protein with YGL and LRDR motifs | Chr3:8089067-8090275 FORWARD LENGTH=248 | 201606	27 kDa			10	11	13	12	12	9	3	3	35	32	0.914286
AT3G24503.1	| aldehyde dehydrogenase 2C4 | Chr3:8919732-8923029 REVERSE LENGTH=501 | 201606	54 kDa			15	18	26	31	28	14	3	3	69	63	0.913043
AT5G48960.1	| HAD-superfamily hydrolase%2C subfamily IG%2C 5'-nucleotidase | Chr5:19849645-19853382 FORWARD LENGTH=642 | 201606	73 kDa			6	9	7	6	10	6	3	3	23	21	0.913043
AT2G47510.1	| fumarase 1 | Chr2:19498614-19502020 FORWARD LENGTH=492 | 201606	53 kDa			61	58	60	64	61	44	3	3	182	166	0.912088
AT4G34670.1	| Ribosomal protein S3Ae | Chr4:16548724-16550222 FORWARD LENGTH=262 | 201606	30 kDa	14	13	6	6	6	6	8	6	4	4	34	31	0.911765
AT4G33010.1	| glycine decarboxylase P-protein 1 | Chr4:15926852-15931150 REVERSE LENGTH=1037 | 201606	113 kDa	3		59	59	63	58	67	58	4	3	192	175	0.911458
AT1G53750.1	| regulatory particle triple-A 1A | Chr1:20065921-20068324 REVERSE LENGTH=426 | 201606	48 kDa	4	2	4	7	8	7	6	4	4	4	22	20	0.909091
AT1G73260.1	| kunitz trypsin inhibitor 1 | Chr1:27547410-27548057 REVERSE LENGTH=215 | 201606	24 kDa	7	6	14	11	19	17	15	16	4	4	55	50	0.909091
AT3G25760.1	| allene oxide cyclase 1 | Chr3:9403972-9405105 FORWARD LENGTH=254 | 201606	28 kDa			9	6	6	6	7	8	3	3	22	20	0.909091
AT1G42970.1	| glyceraldehyde-3-phosphate dehydrogenase B subunit | Chr1:16127552-16129584 FORWARD LENGTH=447 | 201606	48 kDa	39	34	39	40	46	42	50	42	4	4	174	158	0.908046
AT5G11670.1	| NADP-malic enzyme 2 | Chr5:3754456-3758040 FORWARD LENGTH=588 | 201606	64 kDa	1		23	29	37	29	26	21	4	3	87	79	0.908046
AT3G48000.1	| aldehyde dehydrogenase 2B4 | Chr3:17717082-17719843 REVERSE LENGTH=538 | 201606	59 kDa			20	22	24	20	21	17	3	3	65	59	0.907692
AT5G08680.1	| ATP synthase alpha/beta family protein | Chr5:2821992-2824683 FORWARD LENGTH=559 | 201606	60 kDa	32	25	82	70	60	61	62	58	4	4	236	214	0.90678
AT3G47470.1	| light-harvesting chlorophyll-protein complex I subunit A4 | Chr3:17493622-17494773 REVERSE LENGTH=251 | 201606	28 kDa	23	20	11	13	14	14	16	11	4	4	64	58	0.90625
AT1G11860.3	| Glycine cleavage T-protein family | Chr1:4001485-4003245 FORWARD LENGTH=423 | 201606	46 kDa	2		26	28	27	24	29	24	4	3	84	76	0.904762
AT4G04910.1	| AAA-type ATPase family protein | Chr4:2489696-2495666 REVERSE LENGTH=742 | 201606	81 kDa			19	17	11	11	12	10	3	3	42	38	0.904762
AT2G36880.1	| methionine adenosyltransferase 3 | Chr2:15479721-15480893 REVERSE LENGTH=390 | 201606	42 kDa	12	8	43	40	37	39	43	35	4	4	135	122	0.903704
AT3G46000.3	| actin depolymerizing factor 2 | Chr3:16907743-16908216 REVERSE LENGTH=130 | 201606	15 kDa			9	13	12	6	10	9	3	3	31	28	0.903226
AT3G25530.2	| glyoxylate reductase 1 | Chr3:9271949-9273514 REVERSE LENGTH=278 | 201606	30 kDa			13	13	15	11	13	13	3	3	41	37	0.902439
AT5G51970.1	| GroES-like zinc-binding alcohol dehydrogenase family protein | Chr5:21111820-21113284 FORWARD LENGTH=364 | 201606	39 kDa			14	11	11	13	16	13	3	3	41	37	0.902439
AT2G22250.1	| aspartate aminotransferase | Chr2:9458011-9460028 REVERSE LENGTH=428 | 201606	46 kDa	1	2	5	4	6	8	8	4	4	4	20	18	0.9
AT2G36160.1	| Ribosomal protein S11 family protein | Chr2:15169925-15171159 FORWARD LENGTH=150 | 201606	16 kDa	10	6	2	4	4	4	4	4	4	4	20	18	0.9
AT2G46280.1	| TGF-beta receptor interacting protein 1 | Chr2:19003656-19005393 REVERSE LENGTH=328 | 201606	36 kDa	2		2	2	3	5	3	2	4	3	10	9	0.9
AT3G01500.2	| carbonic anhydrase 1 | Chr3:194853-197873 REVERSE LENGTH=347 | 201606	37 kDa	17	11	16	16	14	15	13	12	4	4	60	54	0.9
AT3G07480.1	| 2Fe-2S ferredoxin-like superfamily protein | Chr3:2389026-2389505 FORWARD LENGTH=159 | 201606	18 kDa			2	2	3	4	5	3	3	3	10	9	0.9
AT3G47810.1	| Calcineurin-like metallo-phosphoesterase superfamily protein | Chr3:17637256-17639017 REVERSE LENGTH=190 | 201606	21 kDa			4	4	4	3	2	2	3	3	10	9	0.9
AT3G55620.1	| Translation initiation factor IF6 | Chr3:20634581-20636312 FORWARD LENGTH=245 | 201606	26 kDa			3	3	3	3	4	3	3	3	10	9	0.9
AT4G35450.4	| ankyrin repeat-containing protein 2 | Chr4:16840072-16841759 FORWARD LENGTH=304 | 201606	33 kDa			14	12	14	12	12	12	3	3	40	36	0.9
AT5G02500.1	| heat shock cognate protein 70-1 | Chr5:554055-556334 REVERSE LENGTH=651 | 201606	71 kDa	76	60	93	82	99	94	97	92	4	4	365	328	0.89863
AT3G52930.1	| Aldolase superfamily protein | Chr3:19627383-19628874 REVERSE LENGTH=358 | 201606	39 kDa	11	5	83	81	90	84	87	73	4	4	271	243	0.896679
AT1G51800.1	| Leucine-rich repeat protein kinase family protein | Chr1:19214203-19217833 FORWARD LENGTH=894 | 201606	100 kDa	8	4	6	8	8	7	7	7	4	4	29	26	0.896552
AT1G69990.1	| Leucine-rich repeat protein kinase family protein | Chr1:26360235-26362010 REVERSE LENGTH=591 | 201606	66 kDa	29	26							1	1	29	26	0.896552
AT3G54890.4	| chlorophyll a-b binding protein 6 | Chr3:20339881-20340922 REVERSE LENGTH=213 | 201606	23 kDa	16	14	3	6	6	5	4	1	4	4	29	26	0.896552
AT2G26080.1	| glycine decarboxylase P-protein 2 | Chr2:11109330-11113786 REVERSE LENGTH=1044 | 201606	114 kDa			34	36	40	36	41	31	3	3	115	103	0.895652
AT4G30190.1	| H[+]-ATPase 2 | Chr4:14770820-14775920 REVERSE LENGTH=948 | 201606	104 kDa	82	74	47	66	70	61	69	39	4	4	268	240	0.895522
AT4G32260.1	| ATPase%2C F0 complex%2C subunit B/B'%2C bacterial/chloroplast | Chr4:15573859-15574586 REVERSE LENGTH=219 | 201606	24 kDa	5	2	3	7	6	5	5	3	4	4	19	17	0.894737
AT5G17330.1	| glutamate decarboxylase | Chr5:5711141-5714839 FORWARD LENGTH=502 | 201606	57 kDa			22	23	23	19	21	17	3	3	66	59	0.893939
AT4G35090.1	| catalase 2 | Chr4:16700937-16703215 REVERSE LENGTH=492 | 201606	57 kDa	16	12	36	39	46	45	43	30	4	4	141	126	0.893617
AT5G50850.1	| Transketolase family protein | Chr5:20689671-20692976 FORWARD LENGTH=363 | 201606	39 kDa	2	1	22	23	26	23	25	20	4	4	75	67	0.893333
AT5G03650.1	| starch branching enzyme 2.2 | Chr5:931924-937470 FORWARD LENGTH=805 | 201606	93 kDa			10	13	11	12	16	8	3	3	37	33	0.891892
AT1G17290.1	| alanine aminotransferas | Chr1:5922771-5926093 FORWARD LENGTH=543 | 201606	60 kDa			9	9	9	9	9	6	3	3	27	24	0.888889
AT1G43690.1	| ubiquitin interaction motif-containing protein | Chr1:16478519-16482589 FORWARD LENGTH=599 | 201606	65 kDa			2	2	3	4	4	2	3	3	9	8	0.888889
AT1G68100.1	| ZIP metal ion transporter family | Chr1:25521325-25524032 FORWARD LENGTH=469 | 201606	51 kDa	6	2	2			4	1	2	3	3	9	8	0.888889
AT3G05970.1	| long-chain acyl-CoA synthetase 6 | Chr3:1786510-1791746 REVERSE LENGTH=701 | 201606	77 kDa		1	17	20	27	20	19	15	3	4	63	56	0.888889
AT3G27740.1	| carbamoyl phosphate synthetase A | Chr3:10281470-10283792 REVERSE LENGTH=430 | 201606	47 kDa			3	3	3	3	3	2	3	3	9	8	0.888889
AT3G49910.1	| Translation protein SH3-like family protein | Chr3:18504311-18504751 FORWARD LENGTH=146 | 201606	17 kDa	6	6			1	2	2		3	2	9	8	0.888889
AT4G09520.1	| Cofactor-independent phosphoglycerate mutase | Chr4:6024970-6026751 REVERSE LENGTH=492 | 201606	53 kDa			4	3	3	3	2	2	3	3	9	8	0.888889
AT5G10470.2	| kinesin like protein for actin based chloroplast movement 1 | Chr5:3290121-3297248 REVERSE LENGTH=1274 | 201606	141 kDa			1	4	2	2	6	2	3	3	9	8	0.888889
AT2G45300.1	| RNA 3'-terminal phosphate cyclase/enolpyruvate transferase%2C alpha/beta | Chr2:18677518-18679868 FORWARD LENGTH=520 | 201606	56 kDa			18	17	14	17	21	13	3	3	53	47	0.886792
AT3G09820.1	| adenosine kinase 1 | Chr3:3012122-3014624 FORWARD LENGTH=344 | 201606	38 kDa	2		34	39	40	29	30	26	4	3	106	94	0.886792
AT4G38970.1	| fructose-bisphosphate aldolase 2 | Chr4:18163714-18165659 REVERSE LENGTH=398 | 201606	43 kDa	14	8	18	22	27	23	20	17	4	4	79	70	0.886076
AT1G14810.1	| semialdehyde dehydrogenase family protein | Chr1:5102684-5104633 REVERSE LENGTH=375 | 201606	41 kDa			20	22	23	25	27	15	3	3	70	62	0.885714
AT3G44110.1	| DNAJ homologue 3 | Chr3:15869115-15871059 REVERSE LENGTH=420 | 201606	46 kDa	15	10	10	8	13	16	14	12	4	4	52	46	0.884615
AT1G24180.1	| Thiamin diphosphate-binding fold (THDP-binding) superfamily protein | Chr1:8560777-8563382 REVERSE LENGTH=393 | 201606	43 kDa			26	20	23	21	20	20	3	3	69	61	0.884058
AT1G74030.1	| enolase 1 | Chr1:27839465-27841901 REVERSE LENGTH=477 | 201606	51 kDa			25	24	23	21	21	16	3	3	69	61	0.884058
AT3G59770.3	| sacI homology domain-containing protein / WW domain-containing protein | Chr3:22079281-22085674 REVERSE LENGTH=1646 | 201606	182 kDa			18	17	20	15	13	13	3	3	51	45	0.882353
AT4G36220.1	| ferulic acid 5-hydroxylase 1 | Chr4:17137584-17139619 REVERSE LENGTH=520 | 201606	59 kDa			7	4	6	7	4	4	3	3	17	15	0.882353
AT5G05730.1	| anthranilate synthase alpha subunit 1 | Chr5:1719740-1722811 REVERSE LENGTH=595 | 201606	66 kDa			54	50	59	55	57	45	3	3	170	150	0.882353
AT4G13940.1	| S-adenosyl-L-homocysteine hydrolase | Chr4:8054931-8056676 FORWARD LENGTH=485 | 201606	53 kDa	17	19	22	27	25	22	29	14	4	4	93	82	0.88172
AT1G60710.1	| NAD(P)-linked oxidoreductase superfamily protein | Chr1:22355073-22356627 REVERSE LENGTH=345 | 201606	38 kDa			35	23	22	25	19	19	3	3	76	67	0.881579
AT3G25520.1	| ribosomal protein L5 | Chr3:9269573-9271327 REVERSE LENGTH=301 | 201606	34 kDa	12	17	15	11	8	5	7	4	4	4	42	37	0.880952
AT2G43920.1	| S-adenosyl-L-methionine-dependent methyltransferases superfamily protein | Chr2:18189319-18191248 REVERSE LENGTH=227 | 201606	25 kDa			10	8	9	8	6	6	3	3	25	22	0.88
AT3G16640.1	| translationally controlled tumor protein | Chr3:5669709-5670729 REVERSE LENGTH=168 | 201606	19 kDa	3	1	10	9	7	7	5	5	4	4	25	22	0.88
AT3G45030.1	| Ribosomal protein S10p/S20e family protein | Chr3:16471606-16472312 REVERSE LENGTH=124 | 201606	14 kDa	7	6	6	5	6	6	6	5	4	4	25	22	0.88
AT4G19410.1	| Pectinacetylesterase family protein | Chr4:10582188-10584766 REVERSE LENGTH=391 | 201606	42 kDa	25	22							1	1	25	22	0.88
AT3G17390.1	| S-adenosylmethionine synthetase family protein | Chr3:5952484-5953665 REVERSE LENGTH=393 | 201606	43 kDa	18	18	49	48	56	45	51	42	4	4	174	153	0.87931
AT2G14120.1	| dynamin related protein | Chr2:5954253-5960015 REVERSE LENGTH=780 | 201606	87 kDa			12	9	9	14	12	6	3	3	33	29	0.878788
AT5G19760.1	| Mitochondrial substrate carrier family protein | Chr5:6679591-6681845 REVERSE LENGTH=298 | 201606	32 kDa	24	22	15	14	18	17	17	12	4	4	74	65	0.878378
AT1G75270.1	| dehydroascorbate reductase 2 | Chr1:28250255-28251237 REVERSE LENGTH=213 | 201606	23 kDa			14	11	14	15	13	10	3	3	41	36	0.878049
AT1G06430.1	| FTSH protease 8 | Chr1:1960214-1962525 REVERSE LENGTH=685 | 201606	73 kDa	6	1	13	12	12	16	18	14	4	4	49	43	0.877551
ATCG00280.1	| photosystem II reaction center protein C | ChrC:33720-35141 FORWARD LENGTH=473 | 201606	52 kDa	42	29	19	24	16	14	20	18	4	4	97	85	0.876289
AT1G04270.1	| cytosolic ribosomal protein S15 | Chr1:1141852-1142960 REVERSE LENGTH=152 | 201606	17 kDa	8	7	2	3	3	4	3		4	3	16	14	0.875
AT1G34420.1	| leucine-rich repeat transmembrane protein kinase family protein | Chr1:12584587-12587570 FORWARD LENGTH=966 | 201606	106 kDa	3	2	4	4	2	4	7	4	4	4	16	14	0.875
AT1G58270.1	| TRAF-like family protein | Chr1:21612394-21614089 REVERSE LENGTH=396 | 201606	45 kDa	1		3	3	2	2	2	2	4	3	8	7	0.875
AT1G79230.1	| mercaptopyruvate sulfurtransferase 1 | Chr1:29800824-29803679 FORWARD LENGTH=379 | 201606	42 kDa			15	12	12	11	13	12	3	3	40	35	0.875
AT2G03510.1	| SPFH/Band 7/PHB domain-containing membrane-associated protein family | Chr2:1066717-1068934 FORWARD LENGTH=356 | 201606	41 kDa	4		1	2	1	2	2	3	4	3	8	7	0.875
AT2G20790.1	| clathrin adaptor complexes medium subunit family protein | Chr2:8950162-8952613 REVERSE LENGTH=613 | 201606	67 kDa			4	2	2	2	2	3	3	3	8	7	0.875
AT2G43980.1	| inositol 1%2C3%2C4-trisphosphate 5/6-kinase 4 | Chr2:18208437-18211604 REVERSE LENGTH=488 | 201606	54 kDa			2	4	2	3	4		3	2	8	7	0.875
AT2G44350.1	| Citrate synthase family protein | Chr2:18316673-18320524 FORWARD LENGTH=473 | 201606	53 kDa			15	18	19	20	22	11	3	3	56	49	0.875
AT3G22960.1	| Pyruvate kinase family protein | Chr3:8139369-8141771 FORWARD LENGTH=596 | 201606	65 kDa			12	12	13	15	15	8	3	3	40	35	0.875
AT4G15210.1	| beta-amylase 5 | Chr4:8666734-8669357 REVERSE LENGTH=498 | 201606	56 kDa			2	3	2	2	4	2	3	3	8	7	0.875
AT4G31480.1	| Coatomer%2C beta subunit | Chr4:15264145-15267384 FORWARD LENGTH=948 | 201606	106 kDa	7	4	7	6	3	7	7	4	4	4	24	21	0.875
AT4G31700.1	| ribosomal protein S6 | Chr4:15346306-15347714 REVERSE LENGTH=250 | 201606	28 kDa	3	5	1		3	1	1	1	4	3	8	7	0.875
AT5G04360.1	| limit dextrinase | Chr5:1221566-1228399 FORWARD LENGTH=965 | 201606	107 kDa			2	3	2	2	4	2	3	3	8	7	0.875
AT5G11420.1	| transmembrane protein%2C putative (Protein of unknown function%2C DUF642) | Chr5:3644655-3646991 FORWARD LENGTH=366 | 201606	40 kDa	7	7					1		2	1	8	7	0.875
AT5G11900.1	| Translation initiation factor SUI1 family protein | Chr5:3834154-3836023 FORWARD LENGTH=198 | 201606	22 kDa			3	3	3	2	2	2	3	3	8	7	0.875
AT5G38660.1	| acclimation of photosynthesis to environment | Chr5:15473285-15475497 REVERSE LENGTH=286 | 201606	31 kDa		1	2	2	4	2	2	2	3	4	8	7	0.875
AT5G63860.1	| Regulator of chromosome condensation (RCC1) family protein | Chr5:25554821-25558587 REVERSE LENGTH=440 | 201606	47 kDa			3	3	2	2	3	2	3	3	8	7	0.875
AT1G69830.1	| alpha-amylase-like 3 | Chr1:26288518-26293003 REVERSE LENGTH=887 | 201606	100 kDa			19	20	16	16	20	12	3	3	55	48	0.872727
AT3G61240.1	| DEA(D/H)-box RNA helicase family protein | Chr3:22666590-22669154 FORWARD LENGTH=498 | 201606	57 kDa			12	13	10	13	17	8	3	3	39	34	0.871795
AT2G18960.1	| H[+]-ATPase 1 | Chr2:8221858-8227268 FORWARD LENGTH=949 | 201606	104 kDa	81	71	47	59	71	60	65	40	4	4	264	230	0.871212
AT1G26630.1	| Eukaryotic translation initiation factor 5A-1 (eIF-5A 1) protein | Chr1:9205968-9207098 FORWARD LENGTH=159 | 201606	17 kDa			7	9	9	6	7	5	3	3	23	20	0.869565
AT5G20290.1	| Ribosomal protein S8e family protein | Chr5:6851695-6853012 REVERSE LENGTH=222 | 201606	25 kDa	12	11	5	4	3	3	3	2	4	4	23	20	0.869565
AT5G61170.1	| Ribosomal protein S19e family protein | Chr5:24611158-24612202 FORWARD LENGTH=143 | 201606	16 kDa	5	5	6	8	6	4	6	3	4	4	23	20	0.869565
AT1G20260.1	| ATPase%2C V1 complex%2C subunit B protein | Chr1:7016971-7020290 FORWARD LENGTH=487 | 201606	54 kDa	22	16	10	15	15	15	14	7	4	4	61	53	0.868852
AT3G13470.1	| TCP-1/cpn60 chaperonin family protein | Chr3:4389685-4392624 FORWARD LENGTH=596 | 201606	63 kDa			18	27	15	19	20		3	2	53	46	0.867925
AT1G06700.1	| Protein kinase superfamily protein | Chr1:2052750-2054552 REVERSE LENGTH=361 | 201606	40 kDa	6	5	1	5	5	1	3	2	4	4	15	13	0.866667
AT2G40490.1	| Uroporphyrinogen decarboxylase | Chr2:16912961-16914988 FORWARD LENGTH=394 | 201606	44 kDa			7	5	5	4	3	4	3	3	15	13	0.866667
AT3G21750.1	| UDP-glucosyl transferase 71B1 | Chr3:7664565-7665986 FORWARD LENGTH=473 | 201606	53 kDa			4	7	7	4	4	2	3	3	15	13	0.866667
AT4G16143.1	| importin alpha isoform 2 | Chr4:9134450-9137134 REVERSE LENGTH=535 | 201606	59 kDa			12	9	9	8	9	9	3	3	30	26	0.866667
AT5G43060.1	| Granulin repeat cysteine protease family protein | Chr5:17269784-17272117 REVERSE LENGTH=463 | 201606	51 kDa	1		5	6	5	3	4	4	4	3	15	13	0.866667
AT3G14415.1	| Aldolase-type TIM barrel family protein | Chr3:4818667-4820748 FORWARD LENGTH=367 | 201606	40 kDa	31	26	44	40	48	46	41	30	4	4	164	142	0.865854
AT5G63680.1	| Pyruvate kinase family protein | Chr5:25490507-25492530 FORWARD LENGTH=510 | 201606	55 kDa	2		50	46	45	43	44	33	4	3	141	122	0.865248
AT3G16420.1	| PYK10-binding protein 1 | Chr3:5579560-5580674 FORWARD LENGTH=298 | 201606	32 kDa	17	17	21	26	36	30	29	16	4	4	103	89	0.864078
AT3G02780.1	| isopentenyl pyrophosphate:dimethylallyl pyrophosphate isomerase 2 | Chr3:602578-604648 REVERSE LENGTH=284 | 201606	33 kDa	4		15	15	13	13	12	10	4	3	44	38	0.863636
AT5G45500.3	| RNI-like superfamily protein | Chr5:18432636-18434951 REVERSE LENGTH=763 | 201606	87 kDa			7	6	8	8	7	5	3	3	22	19	0.863636
AT1G66270.1	| Glycosyl hydrolase superfamily protein | Chr1:24700110-24702995 REVERSE LENGTH=524 | 201606	60 kDa	15	9	11	9	9	11	8	8	4	4	43	37	0.860465
AT4G34450.1	| coatomer gamma-2 subunit%2C putative / gamma-2 coat protein%2C putative / gamma-2 COP | Chr4:16471956-16476795 FORWARD LENGTH=886 | 201606	98 kDa	5	4	13	11	12	11	13	11	4	4	43	37	0.860465
AT5G20830.1	| sucrose synthase 1 | Chr5:7050599-7054032 REVERSE LENGTH=808 | 201606	93 kDa	3	1	39	43	54	40	38	31	4	4	134	115	0.858209
AT1G05520.1	| Sec23/Sec24 protein transport family protein | Chr1:1631126-1635703 REVERSE LENGTH=783 | 201606	86 kDa			2	2	4	2	1	2	3	3	7	6	0.857143
AT1G53440.1	| Leucine-rich repeat transmembrane protein kinase | Chr1:19945959-19951562 FORWARD LENGTH=1035 | 201606	115 kDa	7	1		4	5	5	2	2	3	4	14	12	0.857143
AT1G70410.2	| beta carbonic anhydrase 4 | Chr1:26534167-26537457 REVERSE LENGTH=280 | 201606	31 kDa	2	2	8	12	7	9	11	1	4	4	28	24	0.857143
AT1G70730.3	| Phosphoglucomutase/phosphomannomutase family protein | Chr1:26669020-26673166 REVERSE LENGTH=662 | 201606	73 kDa		2	11	8	9	9	8	5	3	4	28	24	0.857143
AT2G21330.3	| fructose-bisphosphate aldolase 1 | Chr2:9128416-9130152 REVERSE LENGTH=389 | 201606	42 kDa	11	5	15	18	20	20	17	11	4	4	63	54	0.857143
AT2G32730.1	| 26S proteasome regulatory complex%2C non-ATPase subcomplex%2C Rpn2/Psmd1 subunit | Chr2:13880189-13885464 FORWARD LENGTH=1004 | 201606	109 kDa	1		3	9	7	7	10	2	4	3	21	18	0.857143
AT2G38540.1	| lipid transfer protein 1 | Chr2:16130418-16130893 FORWARD LENGTH=118 | 201606	12 kDa	6	5	1	1					2	2	7	6	0.857143
AT3G13330.1	| proteasome activating protein 200 | Chr3:4319804-4330061 REVERSE LENGTH=1811 | 201606	203 kDa			3	2	2	2	2	2	3	3	7	6	0.857143
AT3G46830.1	| RAB GTPase homolog A2C | Chr3:17246699-17248362 REVERSE LENGTH=217 | 201606	24 kDa	3	4	14	10	15	13	10	9	4	4	42	36	0.857143
AT4G17300.1	| Class II aminoacyl-tRNA and biotin synthetases superfamily protein | Chr4:9681558-9684833 FORWARD LENGTH=567 | 201606	64 kDa			3	3	2	2	2	1	3	3	7	6	0.857143
AT5G09660.1	| peroxisomal NAD-malate dehydrogenase 2 | Chr5:2993645-2995551 REVERSE LENGTH=354 | 201606	37 kDa		1	8	8	10	7	10	8	3	4	28	24	0.857143
AT5G11720.1	| Glycosyl hydrolases family 31 protein | Chr5:3776840-3780025 FORWARD LENGTH=902 | 201606	101 kDa	28	24							1	1	28	24	0.857143
AT5G41670.1	| 6-phosphogluconate dehydrogenase family protein | Chr5:16665647-16667110 REVERSE LENGTH=487 | 201606	53 kDa			10	9	11	9	14	12	3	3	35	30	0.857143
AT5G54270.1	| light-harvesting chlorophyll B-binding protein 3 | Chr5:22038424-22039383 FORWARD LENGTH=265 | 201606	29 kDa	17	14	8	10	7	8	10	4	4	4	42	36	0.857143
AT3G08940.2	| light harvesting complex photosystem II | Chr3:2717717-2718665 FORWARD LENGTH=287 | 201606	31 kDa	26	19	21	21	20	15	23	22	4	4	90	77	0.855556
AT3G14420.1	| Aldolase-type TIM barrel family protein | Chr3:4821804-4823899 FORWARD LENGTH=367 | 201606	40 kDa	34	26	42	44	53	45	42	31	4	4	171	146	0.853801
AT3G55610.1	| delta 1-pyrroline-5-carboxylate synthase 2 | Chr3:20624278-20628989 REVERSE LENGTH=726 | 201606	79 kDa			12	12	14	13	15	10	3	3	41	35	0.853659
AT1G09640.1	| Translation elongation factor EF1B%2C gamma chain | Chr1:3120162-3122152 FORWARD LENGTH=414 | 201606	47 kDa	9	6	17	17	16	17	19	12	4	4	61	52	0.852459
AT2G37040.1	| PHE ammonia lyase 1 | Chr2:15557602-15560237 REVERSE LENGTH=725 | 201606	79 kDa			8	10	9	8	10	5	3	3	27	23	0.851852
AT1G57720.1	| Translation elongation factor EF1B%2C gamma chain | Chr1:21377873-21380114 FORWARD LENGTH=413 | 201606	46 kDa	6	2	20	19	21	19	20	17	4	4	67	57	0.850746
AT2G30950.4	| FtsH extracellular protease family | Chr2:13174680-13177064 FORWARD LENGTH=699 | 201606	75 kDa	8	3	15	15	17	17	20	16	4	4	60	51	0.85
AT3G03270.2	| Adenine nucleotide alpha hydrolases-like superfamily protein | Chr3:762136-763075 REVERSE LENGTH=159 | 201606	17 kDa			8	7	10	7	2	3	3	3	20	17	0.85
AT1G52510.1	| alpha/beta-Hydrolases superfamily protein | Chr1:19563039-19565260 REVERSE LENGTH=380 | 201606	42 kDa			12	10	9	13	12	5	3	3	33	28	0.848485
AT5G16440.1	| isopentenyl diphosphate isomerase 1 | Chr5:5371765-5373575 FORWARD LENGTH=291 | 201606	33 kDa			12	12	11	10	10	6	3	3	33	28	0.848485
AT1G76680.1	| 12-oxophytodienoate reductase 1 | Chr1:28776982-28778271 FORWARD LENGTH=372 | 201606	41 kDa			12	17	18	16	16	6	3	3	46	39	0.847826
AT4G33070.1	| Thiamine pyrophosphate dependent pyruvate decarboxylase family protein | Chr4:15952519-15954676 REVERSE LENGTH=607 | 201606	66 kDa	3	2	30	28	31	28	28	20	4	4	92	78	0.847826
AT5G49910.1	| chloroplast heat shock protein 70-2 | Chr5:20303470-20306295 FORWARD LENGTH=718 | 201606	77 kDa	33	23	37	32	36	34	38	33	4	4	144	122	0.847222
AT1G23140.1	| Calcium-dependent lipid-binding (CaLB domain) family protein | Chr1:8202362-8203172 REVERSE LENGTH=165 | 201606	19 kDa			4	4	5	3	4	4	3	3	13	11	0.846154
AT4G10450.1	| Ribosomal protein L6 family | Chr4:6463201-6464458 REVERSE LENGTH=194 | 201606	22 kDa	9	11			4				2	1	13	11	0.846154
AT4G13360.1	| ATP-dependent caseinolytic (Clp) protease/crotonase family protein | Chr4:7775133-7777701 FORWARD LENGTH=421 | 201606	46 kDa			13	12	14	12	12	9	3	3	39	33	0.846154
AT5G05600.1	| 2-oxoglutarate (2OG) and Fe(II)-dependent oxygenase superfamily protein | Chr5:1672266-1674602 FORWARD LENGTH=371 | 201606	42 kDa			4	4	7	5	2	2	3	3	13	11	0.846154
AT1G27020.1	| plant/protein | Chr1:9378635-9380419 FORWARD LENGTH=308 | 201606	35 kDa			29	30	32	21	29	25	3	3	90	76	0.844444
AT1G69410.1	| eukaryotic elongation factor 5A-3 | Chr1:26089301-26090194 FORWARD LENGTH=158 | 201606	17 kDa			5	7	8	5	6	4	3	3	19	16	0.842105
AT2G13360.1	| alanine:glyoxylate aminotransferase | Chr2:5539417-5540902 REVERSE LENGTH=401 | 201606	44 kDa	10	5	12	14	21	16	14	13	4	4	57	48	0.842105
AT3G26060.1	| Thioredoxin superfamily protein | Chr3:9524807-9526123 FORWARD LENGTH=216 | 201606	24 kDa	4		2	2	6	10	7	4	4	3	19	16	0.842105
AT1G20630.1	| catalase 1 | Chr1:7146812-7149609 FORWARD LENGTH=492 | 201606	57 kDa			26	24	32	35	30	15	3	3	88	74	0.840909
AT3G09200.1	| Ribosomal protein L10 family protein | Chr3:2823364-2825020 REVERSE LENGTH=320 | 201606	34 kDa	11	12	5	2	3	5	6	2	4	4	25	21	0.84
AT4G15530.1	| pyruvate orthophosphate dikinase | Chr4:8864828-8870727 REVERSE LENGTH=956 | 201606	104 kDa			27	17	25	24	16	16	3	3	68	57	0.838235
AT4G27450.1	| aluminum induced protein with YGL and LRDR motifs | Chr4:13727665-13728683 REVERSE LENGTH=250 | 201606	28 kDa	2		10	10	14	13	11	8	4	3	37	31	0.837838
AT3G03250.1	| UDP-GLUCOSE PYROPHOSPHORYLASE 1 | Chr3:749761-754014 REVERSE LENGTH=469 | 201606	52 kDa			20	23	31	26	29	18	3	3	80	67	0.8375
AT5G56350.1	| Pyruvate kinase family protein | Chr5:22820254-22822529 REVERSE LENGTH=498 | 201606	54 kDa			30	26	30	26	26	20	3	3	86	72	0.837209
AT1G74470.1	| Pyridine nucleotide-disulfide oxidoreductase family protein | Chr1:27991248-27992845 FORWARD LENGTH=467 | 201606	52 kDa	8	5	31	25	29	30	30	22	4	4	98	82	0.836735
AT1G03220.1	| Eukaryotic aspartyl protease family protein | Chr1:787143-788444 FORWARD LENGTH=433 | 201606	46 kDa	22	20	2						2	1	24	20	0.833333
AT1G12360.1	| Sec1/munc18-like (SM) proteins superfamily | Chr1:4201172-4206144 FORWARD LENGTH=666 | 201606	75 kDa				2	2	3	4		2	2	6	5	0.833333
AT1G12840.1	| vacuolar ATP synthase subunit C (VATC) / V-ATPase C subunit / vacuolar proton pump C subunit (DET3) | Chr1:4375584-4378220 FORWARD LENGTH=375 | 201606	43 kDa	8	2	11	14	10	10	13	9	4	4	42	35	0.833333
AT1G29690.1	| MAC/Perforin domain-containing protein | Chr1:10379310-10381861 REVERSE LENGTH=561 | 201606	62 kDa			4	4	4	4	4	2	3	3	12	10	0.833333
AT1G43190.1	| polypyrimidine tract-binding protein 3 | Chr1:16275432-16278185 REVERSE LENGTH=432 | 201606	48 kDa			6	4	7	7	5	4	3	3	18	15	0.833333
AT1G76810.1	| eukaryotic translation initiation factor 2 (eIF-2) family protein | Chr1:28831366-28836310 REVERSE LENGTH=1294 | 201606	142 kDa			3	1	1	3	2	1	3	3	6	5	0.833333
AT2G14260.1	| proline iminopeptidase | Chr2:6041441-6043869 REVERSE LENGTH=380 | 201606	43 kDa			12	11	10	9	14	10	3	3	36	30	0.833333
AT3G04600.1	| Nucleotidylyl transferase superfamily protein | Chr3:1243152-1245958 FORWARD LENGTH=402 | 201606	46 kDa			6	2	4	6	2	2	3	3	12	10	0.833333
AT3G09630.1	| Ribosomal protein L4/L1 family | Chr3:2953813-2955444 FORWARD LENGTH=406 | 201606	45 kDa	9	9	3	3	2	2	4	1	4	4	18	15	0.833333
AT3G44300.1	| nitrilase 2 | Chr3:15983351-15985172 FORWARD LENGTH=339 | 201606	37 kDa			12	8	8	9	10	8	3	3	30	25	0.833333
AT4G04770.1	| ATP binding cassette protein 1 | Chr4:2427998-2429785 REVERSE LENGTH=557 | 201606	62 kDa			10	6	8	8	6	6	3	3	24	20	0.833333
AT4G11600.1	| glutathione peroxidase 6 | Chr4:7010021-7011330 REVERSE LENGTH=232 | 201606	26 kDa	2	1			2	3	2	1	3	3	6	5	0.833333
AT4G23850.1	| AMP-dependent synthetase and ligase family protein | Chr4:12403720-12408263 REVERSE LENGTH=666 | 201606	75 kDa	6	2	19	23	26	21	21	14	4	4	72	60	0.833333
AT4G34620.1	| small subunit ribosomal protein 16 | Chr4:16535084-16536092 REVERSE LENGTH=113 | 201606	13 kDa	6	4	2	2	2	2	2	2	4	4	12	10	0.833333
AT4G37870.1	| phosphoenolpyruvate carboxykinase 1 | Chr4:17802974-17806332 REVERSE LENGTH=671 | 201606	73 kDa	2		5	4	13	16	10	5	4	3	30	25	0.833333
AT5G16710.1	| dehydroascorbate reductase 1 | Chr5:5483312-5484926 FORWARD LENGTH=258 | 201606	29 kDa			4	5	4	2	4	3	3	3	12	10	0.833333
AT5G51070.1	| Clp ATPase | Chr5:20764479-20768481 FORWARD LENGTH=945 | 201606	103 kDa			8	5	10	12	6	3	3	3	24	20	0.833333
ATCG00470.1	| ATP synthase epsilon chain | ChrC:52265-52663 REVERSE LENGTH=132 | 201606	14 kDa	11	7	4	4	4	4	5	5	4	4	24	20	0.833333
AT4G35830.1	| aconitase 1 | Chr4:16973007-16977949 REVERSE LENGTH=898 | 201606	98 kDa			30	30	26	29	33	15	3	3	89	74	0.831461
AT1G48600.2	| S-adenosyl-L-methionine-dependent methyltransferases superfamily protein | Chr1:17966074-17969077 FORWARD LENGTH=491 | 201606	56 kDa			18	17	16	13	13	9	3	3	47	39	0.829787
AT3G06650.1	| ATP-citrate lyase B-1 | Chr3:2079247-2082633 REVERSE LENGTH=608 | 201606	66 kDa			31	25	35	28	28	25	3	3	94	78	0.829787
AT5G46290.1	| 3-ketoacyl-acyl carrier protein synthase I | Chr5:18774439-18776629 REVERSE LENGTH=473 | 201606	50 kDa	2		12	17	13	14	20	8	4	3	47	39	0.829787
AT4G00570.1	| NAD-dependent malic enzyme 2 | Chr4:242817-246522 REVERSE LENGTH=607 | 201606	67 kDa			26	25	33	31	23	12	3	3	82	68	0.829268
AT1G66280.1	| Glycosyl hydrolase superfamily protein | Chr1:24706759-24709737 REVERSE LENGTH=524 | 201606	60 kDa	12	8	16	11	15	19	15	10	4	4	58	48	0.827586
AT2G25280.1	| AmmeMemoRadiSam system protein B | Chr2:10762639-10764631 REVERSE LENGTH=291 | 201606	33 kDa			6	8	8	6	9	5	3	3	23	19	0.826087
AT3G27190.1	| uridine kinase-like 2 | Chr3:10039504-10042917 REVERSE LENGTH=483 | 201606	54 kDa			9	6	9	9	5	4	3	3	23	19	0.826087
AT3G47520.1	| malate dehydrogenase | Chr3:17513657-17514868 FORWARD LENGTH=403 | 201606	42 kDa	2	2	27	26	28	22	29	21	4	4	86	71	0.825581
AT3G29360.1	| UDP-glucose 6-dehydrogenase family protein | Chr3:11267375-11268817 REVERSE LENGTH=480 | 201606	53 kDa	2		19	18	21	14	15	15	4	3	57	47	0.824561
AT1G79340.1	| metacaspase 4 | Chr1:29842849-29844368 FORWARD LENGTH=418 | 201606	45 kDa			6	6	4	4	7	4	3	3	17	14	0.823529
AT3G12290.1	| Amino acid dehydrogenase family protein | Chr3:3919591-3921326 FORWARD LENGTH=299 | 201606	32 kDa			6	5	6	5	5	4	3	3	17	14	0.823529
AT2G37270.1	| ribosomal protein 5B | Chr2:15647883-15649042 REVERSE LENGTH=207 | 201606	23 kDa	16	15	17	14	17	11	12	11	4	4	62	51	0.822581
AT2G13790.1	| somatic embryogenesis receptor-like kinase 4 | Chr2:5741979-5746581 FORWARD LENGTH=620 | 201606	69 kDa	171	177	102	119	116		111	115	4	3	500	411	0.822
AT1G45000.1	| AAA-type ATPase family protein | Chr1:17009220-17011607 FORWARD LENGTH=399 | 201606	45 kDa	3		9	5	10	11	6	7	4	3	28	23	0.821429
AT3G54470.1	| uridine 5'-monophosphate synthase / UMP synthase (PYRE-F) (UMPS) | Chr3:20168285-20170245 REVERSE LENGTH=476 | 201606	52 kDa			8	9	10	8	10	6	3	3	28	23	0.821429
AT5G49460.1	| ATP citrate lyase subunit B 2 | Chr5:20055048-20058195 FORWARD LENGTH=608 | 201606	66 kDa			25	22	31	22	22	20	3	3	78	64	0.820513
AT1G77120.1	| alcohol dehydrogenase 1 | Chr1:28975509-28977216 FORWARD LENGTH=379 | 201606	41 kDa			40	39	45	37	37	24	3	3	122	100	0.819672
AT1G21440.1	| Phosphoenolpyruvate carboxylase family protein | Chr1:7502325-7504103 REVERSE LENGTH=336 | 201606	36 kDa			6	6	10	8	6	4	3	3	22	18	0.818182
AT1G80360.1	| Pyridoxal phosphate (PLP)-dependent transferases superfamily protein | Chr1:30208736-30210643 REVERSE LENGTH=394 | 201606	44 kDa			3	3	3	3	5	3	3	3	11	9	0.818182
AT2G06850.1	| xyloglucan endotransglucosylase/hydrolase 4 | Chr2:2763619-2765490 FORWARD LENGTH=296 | 201606	34 kDa	7	5	2	2	2	2			3	3	11	9	0.818182
AT2G31170.1	| Cysteinyl-tRNA synthetase%2C class Ia family protein | Chr2:13282559-13285616 REVERSE LENGTH=563 | 201606	64 kDa			1	5	5	2	5	2	3	3	11	9	0.818182
AT2G31750.1	| UDP-glucosyl transferase 74D1 | Chr2:13497312-13499870 FORWARD LENGTH=456 | 201606	51 kDa			4	3	4	5	3	1	3	3	11	9	0.818182
AT4G02080.1	| secretion-associated RAS super family 2 | Chr4:921554-922547 FORWARD LENGTH=193 | 201606	22 kDa	2		1	3	3	3	5	3	4	3	11	9	0.818182
AT5G54500.1	| flavodoxin-like quinone reductase 1 | Chr5:22124674-22126256 FORWARD LENGTH=204 | 201606	22 kDa	1		2	3	4	4	4	2	4	3	11	9	0.818182
AT1G23730.1	| beta carbonic anhydrase 3 | Chr1:8395965-8398014 FORWARD LENGTH=258 | 201606	29 kDa	2	2	17	14	14	13	16	11	4	4	49	40	0.816327
AT4G15390.1	| HXXXD-type acyl-transferase family protein | Chr4:8792941-8794281 REVERSE LENGTH=446 | 201606	49 kDa			14	16	18	13	17	11	3	3	49	40	0.816327
AT2G39800.1	| delta1-pyrroline-5-carboxylate synthase 1 | Chr2:16598516-16602939 REVERSE LENGTH=717 | 201606	78 kDa			13	12	12	12	13	7	3	3	38	31	0.815789
AT5G38410.1	| Ribulose bisphosphate carboxylase (small chain) family protein | Chr5:15377501-15378306 REVERSE LENGTH=181 | 201606	20 kDa	18	11	10	12	15	14	11	7	4	4	54	44	0.814815
AT5G58330.2	| lactate/malate dehydrogenase family protein | Chr5:23580010-23582287 REVERSE LENGTH=442 | 201606	48 kDa	8	3	6	6	6	8	7	5	4	4	27	22	0.814815
AT1G10940.1	| Protein kinase superfamily protein | Chr1:3656050-3658170 REVERSE LENGTH=363 | 201606	41 kDa			17	13	13	10	13	12	3	3	43	35	0.813953
AT1G15470.1	| Transducin/WD40 repeat-like superfamily protein | Chr1:5315838-5317696 FORWARD LENGTH=333 | 201606	36 kDa			8	5	3	5	5	3	3	3	16	13	0.8125
AT2G36390.1	| starch branching enzyme 2.1 | Chr2:15264283-15269940 FORWARD LENGTH=858 | 201606	98 kDa			3	6	5	4	8	3	3	3	16	13	0.8125
AT5G20280.1	| sucrose phosphate synthase 1F | Chr5:6844994-6849997 REVERSE LENGTH=1043 | 201606	117 kDa			7	6	1	5	8	2	3	3	16	13	0.8125
AT5G40370.1	| Glutaredoxin family protein | Chr5:16147826-16149052 REVERSE LENGTH=111 | 201606	12 kDa	2	2	20	19	24	18	23	17	4	4	69	56	0.811594
AT3G04840.1	| Ribosomal protein S3Ae | Chr3:1329751-1331418 FORWARD LENGTH=262 | 201606	30 kDa	18	16	7	6	5	8	7		4	3	37	30	0.810811
AT4G23100.1	| glutamate-cysteine ligase | Chr4:12103458-12106751 REVERSE LENGTH=522 | 201606	59 kDa			23	21	28	25	23	14	3	3	74	60	0.810811
AT3G62120.1	| Class II aaRS and biotin synthetases superfamily protein | Chr3:23001227-23003849 REVERSE LENGTH=530 | 201606	61 kDa	2		12	12	12	16	16	6	4	3	42	34	0.809524
AT4G29900.1	| autoinhibited Ca(2+)-ATPase 10 | Chr4:14611225-14618775 REVERSE LENGTH=1069 | 201606	117 kDa	11	6	2	5	4	3	4	3	4	4	21	17	0.809524
AT5G66420.2	| TIM-barrel signal transduction protein | Chr5:26521893-26524986 REVERSE LENGTH=754 | 201606	81 kDa			32	26	28	26	29	20	3	3	89	72	0.808989
AT5G43830.1	| aluminum induced protein with YGL and LRDR motifs | Chr5:17622593-17624239 REVERSE LENGTH=251 | 201606	28 kDa			13	9	15	16	13	8	3	3	41	33	0.804878
AT1G23740.1	| Oxidoreductase%2C zinc-binding dehydrogenase family protein | Chr1:8398245-8399656 REVERSE LENGTH=386 | 201606	41 kDa			20	19	17	12	18	13	3	3	55	44	0.8
AT1G54580.1	| acyl carrier protein 2 | Chr1:20389572-20390770 FORWARD LENGTH=136 | 201606	15 kDa			3		2	2		2	2	2	5	4	0.8
AT2G17390.1	| ankyrin repeat-containing 2B | Chr2:7555870-7557743 FORWARD LENGTH=344 | 201606	37 kDa			12	10	14	8	14	14	3	3	40	32	0.8
AT2G33040.1	| gamma subunit of Mt ATP synthase | Chr2:14018978-14021047 REVERSE LENGTH=325 | 201606	35 kDa	3	2	1		1	2			3	2	5	4	0.8
AT2G35010.1	| thioredoxin O1 | Chr2:14754398-14755888 FORWARD LENGTH=194 | 201606	21 kDa			2	2	3	2			2	2	5	4	0.8
AT2G44490.1	| Glycosyl hydrolase superfamily protein | Chr2:18364872-18367515 FORWARD LENGTH=560 | 201606	64 kDa				1	4	3	1		2	2	5	4	0.8
AT3G09940.1	| monodehydroascorbate reductase | Chr3:3056501-3059103 REVERSE LENGTH=441 | 201606	48 kDa					3	2	2	2	2	2	5	4	0.8
AT3G21630.1	| chitin elicitor receptor kinase 1 | Chr3:7615543-7618530 REVERSE LENGTH=617 | 201606	67 kDa	4	1		2	2	4	4	1	3	4	10	8	0.8
AT3G52140.1	| tetratricopeptide repeat (TPR)-containing protein | Chr3:19333232-19341295 FORWARD LENGTH=1403 | 201606	153 kDa			2	8	7	4	6		3	2	15	12	0.8
AT4G10320.1	| tRNA synthetase class I (I%2C L%2C M and V) family protein | Chr4:6397526-6404509 REVERSE LENGTH=1190 | 201606	135 kDa			3	4	4	2	3	2	3	3	10	8	0.8
AT4G23180.1	| cysteine-rich RLK (RECEPTOR-like protein kinase) 10 | Chr4:12138171-12140780 FORWARD LENGTH=669 | 201606	74 kDa			4	3	4	4	7	5	3	3	15	12	0.8
AT4G24490.1	| RAB geranylgeranyl transferase alpha subunit 1 | Chr4:12655330-12658103 REVERSE LENGTH=678 | 201606	77 kDa			5	5	6	4	4	3	3	3	15	12	0.8
AT4G26870.1	| Class II aminoacyl-tRNA and biotin synthetases superfamily protein | Chr4:13505381-13507619 FORWARD LENGTH=532 | 201606	60 kDa	1		3	2	3	4	3	2	4	3	10	8	0.8
AT5G14200.1	| isopropylmalate dehydrogenase 1 | Chr5:4576220-4578111 FORWARD LENGTH=409 | 201606	44 kDa			17	13	18	12	15	15	3	3	50	40	0.8
AT5G39080.1	| HXXXD-type acyl-transferase family protein | Chr5:15641681-15643072 FORWARD LENGTH=463 | 201606	51 kDa			4	2	5	2	1	4	3	3	10	8	0.8
AT5G64040.1	| photosystem I reaction center subunit PSI-N%2C chloroplast%2C putative / PSI-N%2C putative (PSAN) | Chr5:25628724-25629409 REVERSE LENGTH=171 | 201606	18 kDa	4	2	2	2	2	2	2	2	4	4	10	8	0.8
AT4G37910.1	| mitochondrial heat shock protein 70-1 | Chr4:17825368-17828099 REVERSE LENGTH=682 | 201606	73 kDa	13	9	45	38	51	42	34	25	4	4	143	114	0.797203
AT3G28940.1	| AIG2-like (avirulence induced gene) family protein | Chr3:10968324-10969311 REVERSE LENGTH=169 | 201606	19 kDa			23	20	22	17	14	10	3	3	59	47	0.79661
AT5G15490.1	| UDP-glucose 6-dehydrogenase family protein | Chr5:5027872-5029314 REVERSE LENGTH=480 | 201606	53 kDa			19	19	19	10	16	14	3	3	54	43	0.796296
AT4G39330.1	| cinnamyl alcohol dehydrogenase 9 | Chr4:18291268-18292772 FORWARD LENGTH=360 | 201606	39 kDa			12	12	9	10	13	5	3	3	34	27	0.794118
ATCG00680.1	| photosystem II reaction center protein B | ChrC:72371-73897 FORWARD LENGTH=508 | 201606	56 kDa	31	22	8	12	12	10	12	6	4	4	63	50	0.793651
AT3G53180.1	| nodulin/glutamine synthase-like protein | Chr3:19707068-19711188 FORWARD LENGTH=852 | 201606	94 kDa			30	25	33	26	29	22	3	3	92	73	0.793478
AT2G40290.1	| Eukaryotic translation initiation factor 2 subunit 1 | Chr2:16829030-16830889 REVERSE LENGTH=344 | 201606	39 kDa			11	4	9	11	9	8	3	3	29	23	0.793103
AT3G16460.1	| Mannose-binding lectin superfamily protein | Chr3:5593029-5595522 FORWARD LENGTH=705 | 201606	72 kDa	22	17	37	24	36	47	30	11	4	4	125	99	0.792
AT4G02930.1	| GTP binding Elongation factor Tu family protein | Chr4:1295751-1298354 REVERSE LENGTH=454 | 201606	49 kDa	8	6	22	13	19	15	13	15	4	4	62	49	0.790323
AT1G22410.1	| Class-II DAHP synthetase family protein | Chr1:7912120-7914742 FORWARD LENGTH=527 | 201606	58 kDa	11	5	30	23	31	27	28	24	4	4	100	79	0.79
AT1G29880.1	| glycyl-tRNA synthetase / glycine-tRNA ligase | Chr1:10459662-10462781 REVERSE LENGTH=729 | 201606	82 kDa	2		6	4	6	8	5	3	4	3	19	15	0.789474
AT2G05920.1	| Subtilase family protein | Chr2:2269831-2272207 REVERSE LENGTH=754 | 201606	80 kDa	13	9	2	2	2	2	2	2	4	4	19	15	0.789474
AT5G11680.1	| classical AGP protein | Chr5:3759463-3760634 FORWARD LENGTH=207 | 201606	23 kDa			12	10	18	11	8	9	3	3	38	30	0.789474
AT3G51550.1	| Malectin/receptor-like protein kinase family protein | Chr3:19117877-19120564 REVERSE LENGTH=895 | 201606	98 kDa	11	9	8	6	5	5	9	6	4	4	33	26	0.787879
AT2G36530.1	| Enolase | Chr2:15321081-15323786 REVERSE LENGTH=444 | 201606	48 kDa	9	7	100	83	93	71	85	65	4	4	287	226	0.787456
AT1G47550.1	| exocyst complex component sec3A | Chr1:17457171-17463896 FORWARD LENGTH=887 | 201606	100 kDa	27	16	5	4	5	7	10	10	4	4	47	37	0.787234
AT2G02760.1	| ubiquiting-conjugating enzyme 2 | Chr2:774271-775149 FORWARD LENGTH=152 | 201606	17 kDa			4	4	6	3	4	4	3	3	14	11	0.785714
AT4G09650.1	| F-type H+-transporting ATPase subunit delta | Chr4:6100799-6101503 FORWARD LENGTH=234 | 201606	26 kDa	3		3	4	6	3	2	4	4	3	14	11	0.785714
AT5G07860.1	| HXXXD-type acyl-transferase family protein | Chr5:2511449-2512976 FORWARD LENGTH=454 | 201606	50 kDa			5	2	4	6	5	3	3	3	14	11	0.785714
AT3G63460.1	| transducin family protein / WD-40 repeat family protein | Chr3:23431009-23437241 REVERSE LENGTH=1104 | 201606	120 kDa			13	13	12	11	12	5	3	3	37	29	0.783784
AT2G22780.1	| peroxisomal NAD-malate dehydrogenase 1 | Chr2:9689995-9691923 REVERSE LENGTH=354 | 201606	37 kDa	2	1	16	18	16	13	12	4	4	4	46	36	0.782609
AT5G26360.1	| TCP-1/cpn60 chaperonin family protein | Chr5:9255561-9258891 REVERSE LENGTH=555 | 201606	60 kDa	3		5	9	11	7	4	2	4	3	23	18	0.782609
AT5G56630.1	| phosphofructokinase 7 | Chr5:22924311-22926728 FORWARD LENGTH=485 | 201606	53 kDa	1		8	11	8	4	6	3	4	3	23	18	0.782609
AT2G24180.1	| cytochrome p450 71b6 | Chr2:10281890-10283589 FORWARD LENGTH=503 | 201606	57 kDa			3	2	4	3	2	2	3	3	9	7	0.777778
AT4G32150.1	| vesicle-associated membrane protein 711 | Chr4:15526407-15527651 REVERSE LENGTH=219 | 201606	25 kDa	5	2	2	1		2	2	2	3	4	9	7	0.777778
AT5G17820.1	| Peroxidase superfamily protein | Chr5:5888195-5890101 REVERSE LENGTH=313 | 201606	34 kDa		2	3	3	3	2	3		3	3	9	7	0.777778
AT5G36880.2	| acetyl-CoA synthetase | Chr5:14534961-14540296 REVERSE LENGTH=743 | 201606	82 kDa			8	7	9	9	10	5	3	3	27	21	0.777778
AT3G09260.1	| Glycosyl hydrolase superfamily protein | Chr3:2840657-2843730 REVERSE LENGTH=524 | 201606	60 kDa	40	28	34	27	39	36	37	25	4	4	150	116	0.773333
AT3G06860.1	| multifunctional protein 2 | Chr3:2161926-2166009 FORWARD LENGTH=725 | 201606	79 kDa			6	4	9	10	7	3	3	3	22	17	0.772727
AT5G49810.1	| methionine S-methyltransferase | Chr5:20239418-20246046 FORWARD LENGTH=1071 | 201606	119 kDa			17	12	16	12	15	13	3	3	48	37	0.770833
AT1G17720.2	| Protein phosphatase 2A%2C regulatory subunit PR55 | Chr1:6093949-6098065 REVERSE LENGTH=500 | 201606	56 kDa			8	9	8	7	10	4	3	3	26	20	0.769231
AT1G24360.1	| NAD(P)-binding Rossmann-fold superfamily protein | Chr1:8640820-8643283 FORWARD LENGTH=319 | 201606	34 kDa			5	4	3	2	5	4	3	3	13	10	0.769231
AT1G47420.1	| succinate dehydrogenase 5 | Chr1:17395774-17397176 REVERSE LENGTH=257 | 201606	28 kDa			2	7	6	3	5		3	2	13	10	0.769231
AT5G28050.3	| Cytidine/deoxycytidylate deaminase family protein | Chr5:10044209-10046070 REVERSE LENGTH=290 | 201606	32 kDa			6	4	5	6	2		3	2	13	10	0.769231
AT1G58684.1	| Ribosomal protein S5 family protein | Chr1:21770021-21771217 REVERSE LENGTH=284 | 201606	31 kDa	6		6	12	10	4	8	7	4	3	30	23	0.766667
AT4G00660.1	| RNAhelicase-like 8 | Chr4:274638-277438 FORWARD LENGTH=505 | 201606	58 kDa			6	6	6	5	5	2	3	3	17	13	0.764706
AT5G13110.1	| glucose-6-phosphate dehydrogenase 2 | Chr5:4158952-4161640 FORWARD LENGTH=596 | 201606	67 kDa			6	6	7	4	4	3	3	3	17	13	0.764706
AT5G19990.1	| regulatory particle triple-A ATPase 6A | Chr5:6752144-6754918 FORWARD LENGTH=419 | 201606	47 kDa	4	2	6	4	5	5	2	2	4	4	17	13	0.764706
AT2G47000.1	| ATP binding cassette subfamily B4 | Chr2:19310008-19314750 REVERSE LENGTH=1286 | 201606	139 kDa	12	6		6	4	3	5	1	3	4	21	16	0.761905
AT4G00620.1	| Amino acid dehydrogenase family protein | Chr4:259265-260788 REVERSE LENGTH=360 | 201606	39 kDa			12	12	15	10	15	10	3	3	42	32	0.761905
AT3G15610.1	| Transducin/WD40 repeat-like superfamily protein | Chr3:5291076-5292796 REVERSE LENGTH=341 | 201606	37 kDa			7	5	9	9	9	5	3	3	25	19	0.76
AT1G78850.1	| D-mannose binding lectin protein with Apple-like carbohydrate-binding domain-containing protein | Chr1:29642072-29643397 REVERSE LENGTH=441 | 201606	49 kDa	30	23	6	4	7	8	6	2	4	4	49	37	0.755102
AT1G49040.1	| stomatal cytokinesis defective / SCD1 protein (SCD1) | Chr1:18139419-18148826 REVERSE LENGTH=1187 | 201606	132 kDa			3	2	2	3	3	1	3	3	8	6	0.75
AT1G60940.1	| SNF1-related protein kinase 2.10 | Chr1:22439398-22441896 REVERSE LENGTH=361 | 201606	41 kDa			15	12	11	8	14	10	3	3	40	30	0.75
AT2G35780.1	| serine carboxypeptidase-like 26 | Chr2:15037733-15040104 REVERSE LENGTH=452 | 201606	52 kDa	4	3							1	1	4	3	0.75
AT2G40660.1	| Nucleic acid-binding%2C OB-fold-like protein | Chr2:16966011-16968866 FORWARD LENGTH=389 | 201606	42 kDa				1		2	4		1	2	4	3	0.75
AT3G04870.1	| zeta-carotene desaturase | Chr3:1342842-1346189 FORWARD LENGTH=558 | 201606	62 kDa			4	1				2	1	2	4	3	0.75
AT3G15290.1	| 3-hydroxyacyl-CoA dehydrogenase family protein | Chr3:5145054-5146613 FORWARD LENGTH=294 | 201606	32 kDa			3	2	1	3	4	1	3	3	8	6	0.75
AT3G17020.1	| Adenine nucleotide alpha hydrolases-like superfamily protein | Chr3:5802728-5804063 REVERSE LENGTH=163 | 201606	18 kDa			2	3	4	3	2		3	2	8	6	0.75
AT3G18190.1	| TCP-1/cpn60 chaperonin family protein | Chr3:6232226-6233836 FORWARD LENGTH=536 | 201606	58 kDa			8	7	11	8	5	3	3	3	24	18	0.75
AT3G27160.1	| Ribosomal protein S21 family protein | Chr3:10017531-10018854 FORWARD LENGTH=183 | 201606	21 kDa	2	2			2	1			2	2	4	3	0.75
AT4G13430.1	| isopropyl malate isomerase large subunit 1 | Chr4:7804194-7807789 REVERSE LENGTH=509 | 201606	55 kDa	2		8	13	13	8	13	6	4	3	36	27	0.75
AT4G26910.1	| Dihydrolipoamide succinyltransferase | Chr4:13520127-13522889 REVERSE LENGTH=464 | 201606	50 kDa	3	4			3	1	2	1	3	3	8	6	0.75
AT4G27000.1	| RNA-binding (RRM/RBD/RNP motifs) family protein | Chr4:13554983-13557763 REVERSE LENGTH=415 | 201606	45 kDa			8	6	11	8	9	7	3	3	28	21	0.75
AT4G30140.1	| GDSL-like Lipase/Acylhydrolase superfamily protein | Chr4:14738603-14740548 REVERSE LENGTH=348 | 201606	37 kDa			2	4		2	6		2	2	8	6	0.75
AT5G11170.1	| DEAD/DEAH box RNA helicase family protein | Chr5:3553334-3556646 FORWARD LENGTH=427 | 201606	48 kDa			6	6	10	7	8	5	3	3	24	18	0.75
AT5G40870.1	| uridine kinase/uracil phosphoribosyltransferase 1 | Chr5:16375021-16378384 FORWARD LENGTH=486 | 201606	54 kDa			6	4	6	5	4	3	3	3	16	12	0.75
AT5G42080.3	| dynamin-like protein | Chr5:16820661-16824536 REVERSE LENGTH=604 | 201606	68 kDa	6	6	3	3	2		1		4	2	12	9	0.75
AT5G49760.1	| Leucine-rich repeat protein kinase family protein | Chr5:20216679-20221052 FORWARD LENGTH=953 | 201606	105 kDa	2		1	2			1	1	3	2	4	3	0.75
ATCG00340.1	| Photosystem I%2C PsaA/PsaB protein | ChrC:37375-39579 REVERSE LENGTH=734 | 201606	82 kDa	4	3	3	2	2	2	3	2	4	4	12	9	0.75
AT3G52990.1	| Pyruvate kinase family protein | Chr3:19649046-19652237 FORWARD LENGTH=527 | 201606	57 kDa			17	18	24	14	18	12	3	3	59	44	0.745763
AT5G44020.1	| HAD superfamily%2C subfamily IIIB acid phosphatase | Chr5:17712433-17714046 FORWARD LENGTH=272 | 201606	31 kDa	4	5	7	6	9	7	7	2	4	4	27	20	0.740741
AT1G07670.1	| endomembrane-type CA-ATPase 4 | Chr1:2370305-2374196 REVERSE LENGTH=1061 | 201606	116 kDa			10	5	5	8	8	4	3	3	23	17	0.73913
AT1G06000.1	| UDP-Glycosyltransferase superfamily protein | Chr1:1820495-1821802 REVERSE LENGTH=435 | 201606	48 kDa			6	6	5	4	8	4	3	3	19	14	0.736842
AT5G01410.1	| Aldolase-type TIM barrel family protein | Chr5:172576-173505 REVERSE LENGTH=309 | 201606	33 kDa			13	13	16	13	20	10	3	3	49	36	0.734694
AT3G18080.1	| B-S glucosidase 44 | Chr3:6191586-6194124 FORWARD LENGTH=512 | 201606	59 kDa	1		5	3	5	8	4		4	2	15	11	0.733333
AT3G60750.1	| Transketolase | Chr3:22454004-22456824 FORWARD LENGTH=741 | 201606	80 kDa	8	1	22	21	26	22	30	19	4	4	86	63	0.732558
AT5G01210.1	| HXXXD-type acyl-transferase family protein | Chr5:84554-85981 FORWARD LENGTH=475 | 201606	52 kDa			37	30	42	37	33	15	3	3	112	82	0.732143
AT5G43330.1	| Lactate/malate dehydrogenase family protein | Chr5:17390552-17392449 FORWARD LENGTH=332 | 201606	36 kDa			17	22	22	24	24		3	2	63	46	0.730159
AT1G11650.2	| RNA-binding (RRM/RBD/RNP motifs) family protein | Chr1:3914895-3917941 FORWARD LENGTH=405 | 201606	44 kDa			13	9	7	7	13	8	3	3	33	24	0.727273
AT1G18070.3	| Translation elongation factor EF1A/initiation factor IF2gamma family protein | Chr1:6214236-6218211 REVERSE LENGTH=543 | 201606	61 kDa			10	8	8	5	4	3	3	3	22	16	0.727273
AT1G23820.2	| spermidine synthase | Chr1:8420278-8422480 FORWARD LENGTH=327 | 201606	37 kDa	1	2	9	7	9	5	3	2	4	4	22	16	0.727273
AT2G01250.1	| Ribosomal protein L30/L7 family protein | Chr2:132943-134264 REVERSE LENGTH=242 | 201606	28 kDa	9	4	4	7	5	4	4	1	4	4	22	16	0.727273
AT2G33800.1	| Ribosomal protein S5 family protein | Chr2:14300925-14302352 REVERSE LENGTH=303 | 201606	33 kDa	5	4	6	4	7	6	4	2	4	4	22	16	0.727273
AT2G44120.1	| Ribosomal protein L30/L7 family protein | Chr2:18249227-18250402 REVERSE LENGTH=242 | 201606	28 kDa	8	5	3	7	7	3	4	1	4	4	22	16	0.727273
AT3G17410.1	| Protein kinase superfamily protein | Chr3:5956601-5958882 FORWARD LENGTH=364 | 201606	40 kDa			3	3	3	2	5	3	3	3	11	8	0.727273
AT3G46780.1	| plastid transcriptionally active 16 | Chr3:17228766-17231021 FORWARD LENGTH=510 | 201606	54 kDa			5	4	2	3	4	1	3	3	11	8	0.727273
AT4G34150.1	| Calcium-dependent lipid-binding (CaLB domain) family protein | Chr4:16355035-16356955 FORWARD LENGTH=247 | 201606	27 kDa			6	8	8	4	8	4	3	3	22	16	0.727273
AT5G59160.1	| type one serine/threonine protein phosphatase 2 | Chr5:23879567-23881102 FORWARD LENGTH=312 | 201606	36 kDa			4	3	3	3	4	2	3	3	11	8	0.727273
AT5G23540.1	| Mov34/MPN/PAD-1 family protein | Chr5:7937772-7939339 FORWARD LENGTH=308 | 201606	34 kDa			6	4	6	6	6	3	3	3	18	13	0.722222
AT1G20950.1	| Phosphofructokinase family protein | Chr1:7297467-7301336 REVERSE LENGTH=614 | 201606	67 kDa			9	3	10	9	6	6	3	3	25	18	0.72
AT5G57870.1	| MIF4G domain-containing protein / MA3 domain-containing protein | Chr5:23439755-23443433 FORWARD LENGTH=780 | 201606	86 kDa			8	6	10	5	7	7	3	3	25	18	0.72
AT3G12780.1	| phosphoglycerate kinase 1 | Chr3:4061127-4063140 REVERSE LENGTH=481 | 201606	50 kDa	4		8	10	9	5	11	8	4	3	32	23	0.71875
AT1G09340.1	| chloroplast RNA binding protein | Chr1:3015473-3018035 FORWARD LENGTH=378 | 201606	43 kDa	1		4	8	6	5	10	2	4	3	21	15	0.714286
AT2G30620.1	| winged-helix DNA-binding transcription factor family protein | Chr2:13045360-13046267 FORWARD LENGTH=273 | 201606	28 kDa			7	5	5	10	9		3	2	21	15	0.714286
AT3G05560.1	| Ribosomal L22e protein family | Chr3:1614641-1615204 FORWARD LENGTH=124 | 201606	14 kDa	3	3	2		1	1	1	1	4	3	7	5	0.714286
AT3G18060.1	| transducin family protein / WD-40 repeat family protein | Chr3:6183880-6186788 FORWARD LENGTH=609 | 201606	66 kDa			3	5	4	4	7	1	3	3	14	10	0.714286
AT3G57330.1	| autoinhibited Ca2+-ATPase 11 | Chr3:21211655-21216375 REVERSE LENGTH=1025 | 201606	112 kDa	2	2	1		2	3	2		4	2	7	5	0.714286
AT4G33720.1	| CAP (Cysteine-rich secretory proteins%2C Antigen 5%2C and Pathogenesis-related 1 protein) superfamily protein | Chr4:16182813-16183304 FORWARD LENGTH=163 | 201606	18 kDa			2	2	4	2	1	1	3	3	7	5	0.714286
AT5G26340.1	| Major facilitator superfamily protein | Chr5:9243851-9246994 REVERSE LENGTH=526 | 201606	57 kDa			2	1	3	2	2	2	3	3	7	5	0.714286
AT1G18080.1	| Transducin/WD40 repeat-like superfamily protein | Chr1:6222325-6223901 FORWARD LENGTH=327 | 201606	36 kDa			8	8	9	5	7	4	3	3	24	17	0.708333
AT2G33370.2	| Ribosomal protein L14p/L23e family protein | Chr2:14143718-14144270 REVERSE LENGTH=125 | 201606	13 kDa	9	7	2	2	3	1	3	2	4	4	17	12	0.705882
AT5G54900.1	| RNA-binding protein 45A | Chr5:22295412-22298126 FORWARD LENGTH=387 | 201606	42 kDa			5	4	6	4	6	4	3	3	17	12	0.705882
AT1G45201.3	| triacylglycerol lipase-like 1 | Chr1:17123814-17128462 FORWARD LENGTH=504 | 201606	58 kDa	6	6	10	8	10	5	11	7	4	4	37	26	0.702703
AT3G58610.1	| ketol-acid reductoisomerase | Chr3:21671561-21674639 FORWARD LENGTH=591 | 201606	64 kDa	1		27	17	13	10	6	6	4	3	47	33	0.702128
AT3G14210.1	| GDSL-like lipase/acylhydrolase superfamily protein | Chr3:4729886-4731562 FORWARD LENGTH=392 | 201606	44 kDa	25	18	29	19	29	30	24	8	4	4	107	75	0.700935
AT2G40510.1	| Ribosomal protein S26e family protein | Chr2:16918506-16919623 FORWARD LENGTH=133 | 201606	15 kDa	3	4	2		2	3	3		4	2	10	7	0.7
AT5G24400.1	| NagB/RpiA/CoA transferase-like superfamily protein | Chr5:8330532-8331784 REVERSE LENGTH=325 | 201606	36 kDa			9	7	10	12	11	2	3	3	30	21	0.7
AT5G61410.1	| D-ribulose-5-phosphate-3-epimerase | Chr5:24684085-24685836 REVERSE LENGTH=281 | 201606	30 kDa			5	2	3	3	2	2	3	3	10	7	0.7
AT4G19210.1	| RNAse l inhibitor protein 2 | Chr4:10501906-10504776 FORWARD LENGTH=605 | 201606	68 kDa		3	18	11	13	7	5	4	3	4	36	25	0.694444
AT1G14510.1	| alfin-like 7 | Chr1:4962171-4964154 REVERSE LENGTH=252 | 201606	28 kDa			3	2	3	3	7	4	3	3	13	9	0.692308
AT1G78870.2	| ubiquitin-conjugating enzyme 35 | Chr1:29650589-29652203 FORWARD LENGTH=153 | 201606	17 kDa			2	5	6	2	5	2	3	3	13	9	0.692308
AT2G42740.1	| ribosomal protein large subunit 16A | Chr2:17791794-17792946 FORWARD LENGTH=182 | 201606	21 kDa	5	6	3	3	3		2		4	2	13	9	0.692308
AT4G16060.1	| hypothetical protein | Chr4:9094424-9096147 FORWARD LENGTH=289 | 201606	33 kDa			3	2	6	4	4	3	3	3	13	9	0.692308
AT5G16050.1	| general regulatory factor 5 | Chr5:5244008-5245402 REVERSE LENGTH=268 | 201606	30 kDa			7	2	3	4	3	3	3	3	13	9	0.692308
AT5G43350.1	| phosphate transporter 1%3B1 | Chr5:17399918-17401643 REVERSE LENGTH=524 | 201606	58 kDa	4		3	3	3	3	3	3	4	3	13	9	0.692308
AT1G07770.1	| ribosomal protein S15A | Chr1:2408413-2409065 REVERSE LENGTH=130 | 201606	15 kDa	9	4	4	8	10	6	6	2	4	4	29	20	0.689655
AT2G23600.1	| acetone-cyanohydrin lyase | Chr2:10042325-10043641 REVERSE LENGTH=263 | 201606	30 kDa			3	3	8	5	5	3	3	3	16	11	0.6875
AT5G63620.1	| GroES-like zinc-binding alcohol dehydrogenase family protein | Chr5:25466380-25468296 REVERSE LENGTH=427 | 201606	45 kDa			7	7	4	2	5	2	3	3	16	11	0.6875
AT4G08870.1	| Arginase/deacetylase superfamily protein | Chr4:5646654-5648693 REVERSE LENGTH=344 | 201606	38 kDa			27	25	30	16	22	13	3	3	79	54	0.683544
AT4G24620.1	| phosphoglucose isomerase 1 | Chr4:12708972-12712610 REVERSE LENGTH=613 | 201606	67 kDa			15	15	22	16	16	5	3	3	53	36	0.679245
AT1G43670.1	| Inositol monophosphatase family protein | Chr1:16468184-16470347 FORWARD LENGTH=341 | 201606	37 kDa			21	24	24	12	20	8	3	3	65	44	0.676923
AT2G30490.1	| cinnamate-4-hydroxylase | Chr2:12993861-12995683 REVERSE LENGTH=505 | 201606	58 kDa			20	10	19	18	13	7	3	3	52	35	0.673077
AT3G11130.1	| Clathrin%2C heavy chain | Chr3:3482575-3491667 REVERSE LENGTH=1705 | 201606	193 kDa	20	2	18	23	18	15	20	11	4	4	76	51	0.671053
AT1G05350.1	| NAD(P)-binding Rossmann-fold superfamily protein | Chr1:1560891-1564005 REVERSE LENGTH=431 | 201606	47 kDa			2		2	2	2	2	3	2	6	4	0.666667
AT1G14320.1	| Ribosomal protein L16p/L10e family protein | Chr1:4888270-4889408 FORWARD LENGTH=220 | 201606	25 kDa	5	4	2	2	2	2	3		4	3	12	8	0.666667
AT1G15950.1	| cinnamoyl coa reductase 1 | Chr1:5478855-5481915 FORWARD LENGTH=344 | 201606	37 kDa			8	4	11	10	8	4	3	3	27	18	0.666667
AT1G28440.1	| HAESA-like 1 | Chr1:9996914-10000171 FORWARD LENGTH=996 | 201606	109 kDa	3	2							1	1	3	2	0.666667
AT1G54010.1	| GDSL-like Lipase/Acylhydrolase superfamily protein | Chr1:20158854-20160747 REVERSE LENGTH=386 | 201606	43 kDa	9	1	6	8	8	7	7	4	4	4	30	20	0.666667
AT1G56700.1	| Peptidase C15%2C pyroglutamyl peptidase I-like protein | Chr1:21256743-21257640 FORWARD LENGTH=219 | 201606	24 kDa			4	2	3	2	2	2	3	3	9	6	0.666667
AT1G68010.1	| hydroxypyruvate reductase | Chr1:25493418-25495720 FORWARD LENGTH=386 | 201606	42 kDa			2	3	2	2	5	1	3	3	9	6	0.666667
AT2G05830.4	| NagB/RpiA/CoA transferase-like superfamily protein | Chr2:2229964-2231839 FORWARD LENGTH=328 | 201606	35 kDa			5	6	6	6	10	2	3	3	21	14	0.666667
AT2G34480.2	| Ribosomal protein L18ae/LX family protein | Chr2:14532916-14534278 REVERSE LENGTH=217 | 201606	26 kDa	6	6			2		1		3	1	9	6	0.666667
AT2G41475.1	| Embryo-specific protein 3%2C (ATS3) | Chr2:17295259-17296329 REVERSE LENGTH=179 | 201606	20 kDa	9	6							1	1	9	6	0.666667
AT2G41530.1	| S-formylglutathione hydrolase | Chr2:17323656-17325430 REVERSE LENGTH=284 | 201606	32 kDa			9	6	6	5	6	3	3	3	21	14	0.666667
AT2G45960.1	| plasma membrane intrinsic protein 1B | Chr2:18910450-18911703 FORWARD LENGTH=286 | 201606	31 kDa	12	8	4	3	3	3	5	2	4	4	24	16	0.666667
AT3G07100.1	| Sec23/Sec24 protein transport family protein | Chr3:2245689-2250077 REVERSE LENGTH=1038 | 201606	114 kDa			3	3	4	4	5	1	3	3	12	8	0.666667
AT3G15650.1	| alpha/beta-Hydrolases superfamily protein | Chr3:5306006-5307764 FORWARD LENGTH=255 | 201606	28 kDa			3	2	5	2	4	4	3	3	12	8	0.666667
AT3G48090.1	| alpha/beta-Hydrolases superfamily protein | Chr3:17755553-17757692 REVERSE LENGTH=623 | 201606	72 kDa			3		3	2		2	2	2	6	4	0.666667
AT3G53990.1	| Adenine nucleotide alpha hydrolases-like superfamily protein | Chr3:19989658-19991019 REVERSE LENGTH=160 | 201606	18 kDa			1	2	3	1	2	1	3	3	6	4	0.666667
AT3G55280.1	| ribosomal protein L23AB | Chr3:20500667-20501519 FORWARD LENGTH=154 | 201606	17 kDa	2	2	2		3	2	2	2	4	3	9	6	0.666667
AT3G62870.1	| Ribosomal protein L7Ae/L30e/S12e/Gadd45 family protein | Chr3:23242862-23244273 REVERSE LENGTH=256 | 201606	29 kDa	5	4	1						2	1	6	4	0.666667
AT4G25970.1	| phosphatidylserine decarboxylase 3 | Chr4:13184240-13189139 FORWARD LENGTH=635 | 201606	70 kDa			8	6	6	6	7	2	3	3	21	14	0.666667
AT4G28030.1	| Acyl-CoA N-acyltransferases (NAT) superfamily protein | Chr4:13937748-13939131 REVERSE LENGTH=274 | 201606	30 kDa			1	2	2	2	3		3	2	6	4	0.666667
AT4G29010.1	| Enoyl-CoA hydratase/isomerase family | Chr4:14297312-14302016 REVERSE LENGTH=721 | 201606	78 kDa			6	1	4	5	2	2	3	3	12	8	0.666667
AT4G36940.1	| nicotinate phosphoribosyltransferase 1 | Chr4:17416938-17419883 FORWARD LENGTH=559 | 201606	62 kDa				2	2		1		2	1	3	2	0.666667
AT5G03940.1	| chloroplast signal recognition particle 54 kDa subunit | Chr5:1060265-1063257 REVERSE LENGTH=564 | 201606	61 kDa			1	1	2	2	3	1	3	3	6	4	0.666667
AT5G37510.1	| NADH-ubiquinone dehydrogenase | Chr5:14897490-14900352 FORWARD LENGTH=745 | 201606	81 kDa			6	4	5	4	4	2	3	3	15	10	0.666667
AT5G54770.1	| thiazole biosynthetic enzyme%2C chloroplast (ARA6) (THI1) (THI4) | Chr5:22246634-22247891 FORWARD LENGTH=349 | 201606	37 kDa	9	4	6	10	9	8	12	2	4	4	36	24	0.666667
AT3G09840.1	| cell division cycle 48 | Chr3:3019494-3022832 FORWARD LENGTH=809 | 201606	89 kDa			21	22	22	19	19		3	2	62	41	0.66129
AT1G17745.1	| D-3-phosphoglycerate dehydrogenase | Chr1:6101157-6104979 FORWARD LENGTH=624 | 201606	66 kDa			19	13	12	10	10	4	3	3	41	27	0.658537
AT1G65930.1	| cytosolic NADP+-dependent isocitrate dehydrogenase | Chr1:24539088-24541861 FORWARD LENGTH=410 | 201606	46 kDa	9	5	48	37	37	17	19	15	4	4	113	74	0.654867
AT1G26550.1	| FKBP-like peptidyl-prolyl cis-trans isomerase family protein | Chr1:9171800-9172716 FORWARD LENGTH=142 | 201606	15 kDa			3	2	13	10	10	5	3	3	26	17	0.653846
AT3G16450.1	| Mannose-binding lectin superfamily protein | Chr3:5588593-5589792 FORWARD LENGTH=300 | 201606	32 kDa		1	6	3	6	8	8	1	3	4	20	13	0.65
AT3G50500.1	| SNF1-related protein kinase 2.2 | Chr3:18741805-18743904 REVERSE LENGTH=362 | 201606	41 kDa			4	5	7	3	6	3	3	3	17	11	0.647059
AT3G58140.1	| phenylalanyl-tRNA synthetase class IIc family protein | Chr3:21529988-21532386 REVERSE LENGTH=429 | 201606	49 kDa			14	7	18	13	13	9	3	3	45	29	0.644444
AT1G67090.1	| ribulose bisphosphate carboxylase small chain 1A | Chr1:25048465-25049249 REVERSE LENGTH=180 | 201606	20 kDa	19	14	11	9	16	10	13	5	4	4	59	38	0.644068
AT3G10380.1	| subunit of exocyst complex 8 | Chr3:3219922-3228356 REVERSE LENGTH=1053 | 201606	117 kDa	8	6	2	1	2	1	2	1	4	4	14	9	0.642857
AT4G13930.1	| serine hydroxymethyltransferase 4 | Chr4:8048013-8050021 REVERSE LENGTH=471 | 201606	52 kDa	5	1	3	3	3	4	3	1	4	4	14	9	0.642857
AT3G13870.1	| Root hair defective 3 GTP-binding protein (RHD3) | Chr3:4565762-4571109 REVERSE LENGTH=802 | 201606	89 kDa			15	10	15	6	9	9	3	3	39	25	0.641026
AT4G02520.1	| glutathione S-transferase PHI 2 | Chr4:1110673-1111531 REVERSE LENGTH=212 | 201606	24 kDa	5	3	12	9	12	6	10	7	4	4	39	25	0.641026
AT1G43170.1	| ribosomal protein 1 | Chr1:16266992-16268631 FORWARD LENGTH=389 | 201606	45 kDa	19	14	4		2	2			3	2	25	16	0.64
AT1G71820.1	| SEC6 | Chr1:27010022-27016745 FORWARD LENGTH=752 | 201606	86 kDa	10	6				1	1		2	2	11	7	0.636364
AT3G55750.1	| Ribosomal protein L35Ae family protein | Chr3:20698641-20699553 FORWARD LENGTH=111 | 201606	13 kDa	5	2	2	2	2	2	2	1	4	4	11	7	0.636364
AT5G26280.3	| TRAF-like family protein | Chr5:9208667-9210403 FORWARD LENGTH=369 | 201606	42 kDa	3	2	6	6	12	7	9	4	4	4	30	19	0.633333
AT1G12050.1	| fumarylacetoacetase | Chr1:4072904-4075856 FORWARD LENGTH=421 | 201606	46 kDa			5	3	4	5	7	2	3	3	16	10	0.625
AT1G50480.1	| 10-formyltetrahydrofolate synthetase | Chr1:18702064-18704687 FORWARD LENGTH=634 | 201606	68 kDa			2	1	4	2	2	2	3	3	8	5	0.625
AT3G05090.1	| Transducin/WD40 repeat-like superfamily protein | Chr3:1418573-1422723 REVERSE LENGTH=753 | 201606	82 kDa			4	3	2	2	2		3	2	8	5	0.625
AT5G06600.1	| ubiquitin-specific protease 12 | Chr5:2019545-2027834 REVERSE LENGTH=1116 | 201606	131 kDa			4	2	1	3	3		3	2	8	5	0.625
AT5G20990.1	| molybdopterin biosynthesis CNX1 protein / molybdenum cofactor biosynthesis enzyme CNX1 (CNX1) | Chr5:7128737-7133397 REVERSE LENGTH=670 | 201606	71 kDa			2	2	4	2	2	1	3	3	8	5	0.625
AT5G47910.1	| respiratory burst oxidase homologue D | Chr5:19397585-19401768 FORWARD LENGTH=921 | 201606	104 kDa				2	4	3	4		2	2	8	5	0.625
AT5G63890.2	| histidinol dehydrogenase | Chr5:25565600-25568104 REVERSE LENGTH=466 | 201606	50 kDa			8	7	7	4	9	4	3	3	24	15	0.625
AT2G47940.1	| DEGP protease 2 | Chr2:19618372-19622164 REVERSE LENGTH=607 | 201606	67 kDa			12	12	12	8	13	3	3	3	37	23	0.621622
AT1G53240.1	| Lactate/malate dehydrogenase family protein | Chr1:19854966-19856802 REVERSE LENGTH=341 | 201606	36 kDa	2		8	8	9	3	10	7	4	3	29	18	0.62069
AT5G09650.1	| pyrophosphorylase 6 | Chr5:2991331-2993117 REVERSE LENGTH=300 | 201606	33 kDa			9	4	4	2		2	2	3	13	8	0.615385
AT5G13490.1	| ADP/ATP carrier 2 | Chr5:4336034-4337379 FORWARD LENGTH=385 | 201606	42 kDa	38				37	42	38	27	3	2	113	69	0.610619
AT1G29900.1	| carbamoyl phosphate synthetase B | Chr1:10468164-10471976 FORWARD LENGTH=1187 | 201606	130 kDa			11	5	8	6	4	3	3	3	23	14	0.608696
AT5G64120.1	| Peroxidase superfamily protein | Chr5:25659551-25660946 REVERSE LENGTH=328 | 201606	35 kDa			6	5	9	7	8	2	3	3	23	14	0.608696
AT1G16350.1	| Aldolase-type TIM barrel family protein | Chr1:5590951-5592872 FORWARD LENGTH=502 | 201606	54 kDa			8	7	10	7	10	3	3	3	28	17	0.607143
AT1G02880.3	| thiamin pyrophosphokinase1 | Chr1:643063-644485 REVERSE LENGTH=267 | 201606	30 kDa			2	2		1	3		2	2	5	3	0.6
AT1G07780.1	| phosphoribosylanthranilate isomerase 1 | Chr1:2410352-2411833 REVERSE LENGTH=275 | 201606	30 kDa			2	1	2	2	1		3	2	5	3	0.6
AT1G59870.1	| ABC-2 and Plant PDR ABC-type transporter family protein | Chr1:22034661-22039844 FORWARD LENGTH=1469 | 201606	165 kDa	35	17	13	10	9	9	18	9	4	4	75	45	0.6
AT1G62660.1	| Glycosyl hydrolases family 32 protein | Chr1:23199949-23203515 FORWARD LENGTH=648 | 201606	72 kDa			1	1	2	2	2		3	2	5	3	0.6
AT1G62740.1	| stress-inducible protein | Chr1:23231026-23233380 FORWARD LENGTH=571 | 201606	65 kDa			2	3	4	2	4	1	3	3	10	6	0.6
AT1G76160.1	| SKU5 similar 5 | Chr1:28578211-28581020 REVERSE LENGTH=541 | 201606	60 kDa				1	2	2	3		2	2	5	3	0.6
AT3G54400.1	| Eukaryotic aspartyl protease family protein | Chr3:20140291-20142599 REVERSE LENGTH=425 | 201606	45 kDa	15	9							1	1	15	9	0.6
AT4G29220.1	| phosphofructokinase 1 | Chr4:14403621-14406071 REVERSE LENGTH=473 | 201606	52 kDa			16	9	7	2	2	4	3	3	25	15	0.6
AT4G29510.1	| arginine methyltransferase 11 | Chr4:14491739-14493752 FORWARD LENGTH=390 | 201606	44 kDa			2			2	3	1	2	2	5	3	0.6
AT5G12470.1	| UvrABC system C protein%2C putative (DUF3411) | Chr5:4044950-4047290 REVERSE LENGTH=386 | 201606	41 kDa	12	4	3	2	3	4	2	2	4	4	20	12	0.6
AT5G22650.1	| histone deacetylase 2B | Chr5:7534120-7536054 FORWARD LENGTH=306 | 201606	32 kDa			1	2	5	2	4	2	3	3	10	6	0.6
AT5G18380.1	| Ribosomal protein S5 domain 2-like superfamily protein | Chr5:6090253-6090693 REVERSE LENGTH=146 | 201606	17 kDa	17	12	1	1	5	2	4	1	4	4	27	16	0.592593
AT1G11580.2	| methylesterase PCR A | Chr1:3888667-3890649 FORWARD LENGTH=578 | 201606	64 kDa	2			4	4	3	6		3	2	12	7	0.583333
AT1G74260.1	| purine biosynthesis 4 | Chr1:27923005-27927764 REVERSE LENGTH=1407 | 201606	154 kDa			5	2	5	3	2	2	3	3	12	7	0.583333
AT2G45710.1	| Zinc-binding ribosomal protein family protein | Chr2:18831243-18831999 FORWARD LENGTH=84 | 201606	9 kDa	6	3	2		2	2	2	2	4	3	12	7	0.583333
AT5G59910.1	| Histone superfamily protein | Chr5:24127206-24127658 FORWARD LENGTH=150 | 201606	16 kDa	7	2	6	4	6	6	7	3	4	4	26	15	0.576923
AT1G68560.1	| alpha-xylosidase 1 | Chr1:25734435-25737897 REVERSE LENGTH=915 | 201606	102 kDa	7	4							1	1	7	4	0.571429
AT3G61220.1	| NAD(P)-binding Rossmann-fold superfamily protein | Chr3:22663025-22664316 FORWARD LENGTH=296 | 201606	33 kDa			6	2		2	1		2	2	7	4	0.571429
AT4G09000.1	| general regulatory factor 1 | Chr4:5775387-5777157 FORWARD LENGTH=267 | 201606	30 kDa	5	1	17	7	10	9	10	7	4	4	42	24	0.571429
AT4G30010.1	| ATP-dependent RNA helicase | Chr4:14672947-14673219 FORWARD LENGTH=90 | 201606	10 kDa	8	2	2	2	2	2	2	2	4	4	14	8	0.571429
AT5G16510.1	| Alpha-1%2C4-glucan-protein synthase family protein | Chr5:5393296-5394342 FORWARD LENGTH=348 | 201606	39 kDa			2		2	2	3	2	3	2	7	4	0.571429
AT5G24460.1	| RING-H2 zinc finger protein | Chr5:8354815-8355717 FORWARD LENGTH=300 | 201606	33 kDa			3	3	6	4	5	1	3	3	14	8	0.571429
AT5G56760.1	| serine acetyltransferase 1%3B1 | Chr5:22961498-22962582 REVERSE LENGTH=312 | 201606	33 kDa			1	2	2	2	4		3	2	7	4	0.571429
AT5G66200.1	| armadillo repeat only 2 | Chr5:26453648-26455603 REVERSE LENGTH=651 | 201606	71 kDa	4			1	2	2	1	1	3	3	7	4	0.571429
AT5G54430.1	| Adenine nucleotide alpha hydrolases-like superfamily protein | Chr5:22097563-22099693 REVERSE LENGTH=242 | 201606	26 kDa			10	7	10	4	10	6	3	3	30	17	0.566667
AT4G09320.1	| nucleoside diphosphate kinase | Chr4:5923484-5924366 FORWARD LENGTH=149 | 201606	17 kDa	4		9	4	6	5	6	5	4	3	25	14	0.56
AT1G74050.1	| Ribosomal protein L6 family protein | Chr1:27847256-27848680 REVERSE LENGTH=233 | 201606	26 kDa	6	5			1		2		3	1	9	5	0.555556
AT3G51800.1	| metallopeptidase M24 family protein | Chr3:19211261-19213568 REVERSE LENGTH=392 | 201606	43 kDa			5		1	2	3	3	3	2	9	5	0.555556
AT4G24820.1	| 26S proteasome regulatory subunit Rpn7 | Chr4:12790471-12792599 REVERSE LENGTH=387 | 201606	44 kDa	2		3	2	2	3	2		4	2	9	5	0.555556
AT2G17340.1	| pantothenate kinase | Chr2:7541615-7544089 REVERSE LENGTH=367 | 201606	41 kDa			5	4	4		2	2	3	2	11	6	0.545455
AT4G23600.1	| Tyrosine transaminase family protein | Chr4:12310657-12312885 FORWARD LENGTH=422 | 201606	47 kDa			17	7	19	13	14	7	3	3	50	27	0.54
AT1G62640.1	| 3-ketoacyl-acyl carrier protein synthase III | Chr1:23192502-23194737 FORWARD LENGTH=404 | 201606	43 kDa			2	4	4	2	7	1	3	3	13	7	0.538462
AT3G49010.1	| breast basic conserved 1 | Chr3:18166971-18168047 REVERSE LENGTH=206 | 201606	24 kDa	7	4	2	3	2		2		4	2	13	7	0.538462
AT4G16260.1	| Glycosyl hydrolase superfamily protein | Chr4:9200180-9201441 REVERSE LENGTH=344 | 201606	38 kDa	2		2	2	6	2	3	3	4	3	13	7	0.538462
AT4G23190.1	| cysteine-rich RLK (RECEPTOR-like protein kinase) 11 | Chr4:12141197-12143710 REVERSE LENGTH=667 | 201606	74 kDa	4	2	4	2	2		5	4	4	3	15	8	0.533333
AT4G39520.1	| GTP-binding protein-like protein | Chr4:18371329-18374000 REVERSE LENGTH=369 | 201606	41 kDa			6	2	5	3	4	3	3	3	15	8	0.533333
AT3G58500.1	| protein phosphatase 2A-4 | Chr3:21635503-21638911 REVERSE LENGTH=313 | 201606	36 kDa			5	5	6	4	6		3	2	17	9	0.529412
AT3G52500.1	| Eukaryotic aspartyl protease family protein | Chr3:19465644-19467053 REVERSE LENGTH=469 | 201606	51 kDa	5	3	4	6	3		7	1	4	3	19	10	0.526316
AT4G33090.1	| aminopeptidase M1 | Chr4:15965915-15970418 REVERSE LENGTH=879 | 201606	98 kDa	7	2	8	4	5	7	9	2	4	4	29	15	0.517241
AT2G17360.1	| Ribosomal protein S4 (RPS4A) family protein | Chr2:7546598-7548138 FORWARD LENGTH=261 | 201606	30 kDa	19	13	7	2	4	2	3		4	3	33	17	0.515152
AT1G02920.1	| glutathione S-transferase 7 | Chr1:658886-659705 REVERSE LENGTH=209 | 201606	24 kDa	2	1	5	2	4	3	7	3	4	4	18	9	0.5
AT1G07660.1	| Histone superfamily protein | Chr1:2369212-2369523 FORWARD LENGTH=103 | 201606	11 kDa	6	2				1			1	2	6	3	0.5
AT1G09750.1	| Eukaryotic aspartyl protease family protein | Chr1:3157541-3158960 FORWARD LENGTH=449 | 201606	48 kDa	6	3							1	1	6	3	0.5
AT2G16600.1	| rotamase CYP 3 | Chr2:7200862-7201383 FORWARD LENGTH=173 | 201606	18 kDa			4	1	2		2	3	3	2	8	4	0.5
AT2G35840.1	| Sucrose-6F-phosphate phosphohydrolase family protein | Chr2:15053952-15055776 FORWARD LENGTH=422 | 201606	48 kDa			3	2	2	1	1		3	2	6	3	0.5
AT3G02760.1	| Class II aaRS and biotin synthetases superfamily protein | Chr3:597588-600650 REVERSE LENGTH=883 | 201606	98 kDa			7	5	5	2	4	1	3	3	16	8	0.5
AT3G09350.2	| Fes1A | Chr3:2871710-2873109 FORWARD LENGTH=327 | 201606	36 kDa				1	2	2	4		2	2	6	3	0.5
AT3G20820.1	| Leucine-rich repeat (LRR) family protein | Chr3:7280930-7282027 FORWARD LENGTH=365 | 201606	40 kDa	4	2							1	1	4	2	0.5
AT3G22230.1	| Ribosomal L27e protein family | Chr3:7844136-7844543 REVERSE LENGTH=135 | 201606	16 kDa	6	3							1	1	6	3	0.5
AT3G28715.1	| ATPase%2C V0/A0 complex%2C subunit C/D | Chr3:10778025-10780350 FORWARD LENGTH=351 | 201606	41 kDa	5	1		2			1		2	2	6	3	0.5
AT3G44100.1	| MD-2-related lipid recognition domain-containing protein | Chr3:15866162-15867273 REVERSE LENGTH=152 | 201606	16 kDa	4	2							1	1	4	2	0.5
AT3G56940.1	| dicarboxylate diiron protein%2C putative (Crd1) | Chr3:21076594-21078269 FORWARD LENGTH=409 | 201606	48 kDa	9	4					1	1	2	2	10	5	0.5
AT4G11420.1	| eukaryotic translation initiation factor 3A | Chr4:6947834-6952053 REVERSE LENGTH=987 | 201606	114 kDa	3		2	2	3	2	4	2	4	3	12	6	0.5
AT4G11820.1	| hydroxymethylglutaryl-CoA synthase / HMG-CoA synthase / 3-hydroxy-3-methylglutaryl coenzyme A synthase | Chr4:7109124-7111213 REVERSE LENGTH=406 | 201606	45 kDa			7	7	6	2	9	2	3	3	22	11	0.5
AT4G11960.1	| PGR5-like B | Chr4:7175340-7177709 REVERSE LENGTH=313 | 201606	35 kDa			3	2	4		3	3	3	2	10	5	0.5
AT4G14880.1	| O-acetylserine (thiol) lyase (OAS-TL) isoform A1 | Chr4:8518209-8520050 REVERSE LENGTH=322 | 201606	34 kDa	1		6	3		2	3		3	2	10	5	0.5
AT4G33360.1	| NAD(P)-binding Rossmann-fold superfamily protein | Chr4:16067989-16069374 REVERSE LENGTH=344 | 201606	38 kDa	2		2	3	1		1		4	1	6	3	0.5
AT5G01600.1	| ferretin 1 | Chr5:228149-229594 REVERSE LENGTH=255 | 201606	28 kDa			4	2	4	2	4	2	3	3	12	6	0.5
AT5G02960.1	| Ribosomal protein S12/S23 family protein | Chr5:693280-694396 REVERSE LENGTH=142 | 201606	16 kDa	8	4							1	1	8	4	0.5
AT5G23120.1	| photosystem II stability/assembly factor%2C chloroplast (HCF136) | Chr5:7778154-7780463 FORWARD LENGTH=403 | 201606	44 kDa	3	2					1		2	1	4	2	0.5
AT5G25265.1	| Hyp O-arabinosyltransferase-like protein | Chr5:8754794-8756855 REVERSE LENGTH=366 | 201606	41 kDa			2	2	2		4	2	3	2	8	4	0.5
AT5G27850.1	| Ribosomal protein L18e/L15 superfamily protein | Chr5:9873169-9874297 FORWARD LENGTH=187 | 201606	21 kDa	4	4	2		2				3	1	8	4	0.5
AT5G36220.1	| cytochrome p450 81d1 | Chr5:14253827-14256015 REVERSE LENGTH=502 | 201606	57 kDa			3	3	7	2			2	2	10	5	0.5
AT5G67290.1	| FAD-dependent oxidoreductase family protein | Chr5:26848419-26849755 REVERSE LENGTH=406 | 201606	43 kDa			1	1	2		1	1	3	2	4	2	0.5
ATCG00830.1	| ribosomal protein L2 | ChrC:84337-85843 REVERSE LENGTH=274 | 201606	30 kDa	3	2	1						2	1	4	2	0.5
AT3G44720.1	| arogenate dehydratase 4 | Chr3:16271759-16273033 FORWARD LENGTH=424 | 201606	46 kDa			7	5	8	7	10		3	2	25	12	0.48
AT1G05010.1	| ethylene-forming enzyme | Chr1:1431419-1432695 REVERSE LENGTH=323 | 201606	37 kDa	2		12	8	12	6	8	2	4	3	34	16	0.470588
AT3G19170.1	| presequence protease 1 | Chr3:6625578-6631874 REVERSE LENGTH=1080 | 201606	121 kDa			4	3	5	3	4		3	2	13	6	0.461538
AT5G26830.1	| Threonyl-tRNA synthetase | Chr5:9437351-9441568 FORWARD LENGTH=709 | 201606	81 kDa			3	2	5	4	5		3	2	13	6	0.461538
AT3G04720.1	| pathogenesis-related 4 | Chr3:1285691-1286531 REVERSE LENGTH=212 | 201606	23 kDa			2	1	6	4	3		3	2	11	5	0.454545
AT5G07440.1	| glutamate dehydrogenase 2 | Chr5:2356153-2358012 FORWARD LENGTH=411 | 201606	45 kDa	2		6	4		1	3		3	2	11	5	0.454545
AT5G46630.2	| Clathrin adaptor complexes medium subunit family protein | Chr5:18920580-18923060 FORWARD LENGTH=441 | 201606	49 kDa			3	2	2	2	4		3	2	9	4	0.444444
AT2G43090.1	| Aconitase/3-isopropylmalate dehydratase protein | Chr2:17918957-17919712 FORWARD LENGTH=251 | 201606	27 kDa			8	2	4	3	4	2	3	3	16	7	0.4375
AT2G26740.1	| soluble epoxide hydrolase | Chr2:11393148-11394257 REVERSE LENGTH=321 | 201606	36 kDa			3				4	3	2	1	7	3	0.428571
AT3G49430.1	| SER/ARG-rich protein 34A | Chr3:18332668-18334829 FORWARD LENGTH=300 | 201606	34 kDa			2	4	7	2	5		3	2	14	6	0.428571
AT3G53900.2	| uracil phosphoribosyltransferase | Chr3:19956914-19959006 REVERSE LENGTH=296 | 201606	32 kDa			2	1	3	2	2		3	2	7	3	0.428571
AT3G60770.1	| Ribosomal protein S13/S15 | Chr3:22460525-22461656 REVERSE LENGTH=151 | 201606	17 kDa	2	1		2	5				2	2	7	3	0.428571
AT3G63140.1	| chloroplast stem-loop binding protein of 41 kDa | Chr3:23327006-23328620 REVERSE LENGTH=406 | 201606	44 kDa			3	1		2	4		2	2	7	3	0.428571
AT1G51760.1	| peptidase M20/M25/M40 family protein | Chr1:19199562-19201424 FORWARD LENGTH=440 | 201606	48 kDa			3		2	2			2	1	5	2	0.4
AT1G78830.1	| Curculin-like (mannose-binding) lectin family protein | Chr1:29637141-29638508 REVERSE LENGTH=455 | 201606	50 kDa	4	2	2		2	2	2		4	2	10	4	0.4
AT2G35490.1	| Plastid-lipid associated protein PAP / fibrillin family protein | Chr2:14912309-14913797 REVERSE LENGTH=376 | 201606	41 kDa			2		3	2			2	1	5	2	0.4
AT2G38530.1	| lipid transfer protein 2 | Chr2:16128481-16128948 FORWARD LENGTH=118 | 201606	12 kDa	5	2							1	1	5	2	0.4
AT3G63520.1	| carotenoid cleavage dioxygenase 1 | Chr3:23452940-23455896 FORWARD LENGTH=538 | 201606	61 kDa			2	4	4		4		3	1	10	4	0.4
AT4G35230.1	| BR-signaling kinase 1 | Chr4:16755325-16758041 REVERSE LENGTH=512 | 201606	57 kDa	2					2	3		2	1	5	2	0.4
AT5G27540.1	| MIRO-related GTP-ase 1 | Chr5:9722816-9727112 FORWARD LENGTH=648 | 201606	72 kDa			6	2	2	2	2		3	2	10	4	0.4
AT1G54000.1	| GDSL-like Lipase/Acylhydrolase superfamily protein | Chr1:20154548-20156365 REVERSE LENGTH=391 | 201606	43 kDa	7			2	6	5	5		3	2	18	7	0.388889
AT1G43800.1	| Plant stearoyl-acyl-carrier-protein desaturase family protein | Chr1:16577662-16579549 FORWARD LENGTH=391 | 201606	44 kDa	5	3	1		2				3	1	8	3	0.375
AT2G43620.1	| Chitinase family protein | Chr2:18093954-18095025 REVERSE LENGTH=283 | 201606	30 kDa	2		1	2	3	4	10		4	2	16	6	0.375
AT4G05160.1	| AMP-dependent synthetase and ligase family protein | Chr4:2664451-2666547 FORWARD LENGTH=544 | 201606	60 kDa			2	1	4	2	2		3	2	8	3	0.375
AT1G33590.1	| Leucine-rich repeat (LRR) family protein | Chr1:12177788-12179221 FORWARD LENGTH=477 | 201606	52 kDa	11	4							1	1	11	4	0.363636
AT3G04880.1	| DNA-damage-repair/toleration protein (DRT102) | Chr3:1346431-1347363 REVERSE LENGTH=310 | 201606	33 kDa			4	2	5	1	2	1	3	3	11	4	0.363636
AT1G32990.1	| plastid ribosomal protein l11 | Chr1:11955827-11957139 FORWARD LENGTH=222 | 201606	23 kDa			3	1					1	1	3	1	0.333333
AT1G35680.1	| Ribosomal protein L21 | Chr1:13208777-13210246 FORWARD LENGTH=220 | 201606	24 kDa	6	2							1	1	6	2	0.333333
AT2G16950.1	| transportin 1 | Chr2:7353939-7360637 FORWARD LENGTH=895 | 201606	100 kDa				1	4	1	2		2	2	6	2	0.333333
AT3G53020.1	| Ribosomal protein L24e family protein | Chr3:19660749-19661912 REVERSE LENGTH=163 | 201606	19 kDa	8	4			2		2		3	1	12	4	0.333333
AT4G17090.1	| chloroplast beta-amylase | Chr4:9605266-9607250 REVERSE LENGTH=548 | 201606	61 kDa			4	2	3	2	5		3	2	12	4	0.333333
AT5G28840.1	| GDP-D-mannose 3'%2C5'-epimerase | Chr5:10862472-10864024 REVERSE LENGTH=377 | 201606	43 kDa			6	2	4	2	2		3	2	12	4	0.333333
AT5G35735.1	| Auxin-responsive family protein | Chr5:13900913-13902934 REVERSE LENGTH=404 | 201606	44 kDa	2			2	2		2		3	1	6	2	0.333333
AT5G40770.1	| prohibitin 3 | Chr5:16315589-16316621 REVERSE LENGTH=277 | 201606	30 kDa	8	1	3	1	3	2	8	3	4	4	22	7	0.318182
AT3G16470.1	| Mannose-binding lectin superfamily protein | Chr3:5596096-5597709 REVERSE LENGTH=451 | 201606	48 kDa	8	2	8	2	4	4	6		4	3	26	8	0.307692
AT4G16340.1	| guanyl-nucleotide exchange factors%3BGTPase binding%3BGTP binding protein | Chr4:9228773-9241060 REVERSE LENGTH=1830 | 201606	207 kDa			4	4	2		7		3	1	13	4	0.307692
AT5G15200.1	| Ribosomal protein S4 | Chr5:4935124-4936334 REVERSE LENGTH=198 | 201606	23 kDa	10	3	1	1	1		1		4	2	13	4	0.307692
AT5G26260.1	| TRAF-like family protein | Chr5:9200492-9202153 FORWARD LENGTH=351 | 201606	40 kDa	2		2	2	4	2	5		4	2	13	4	0.307692
AT3G12670.1	| CTP synthase family protein | Chr3:4020351-4024086 REVERSE LENGTH=591 | 201606	64 kDa			2	1	6	2	2		3	2	10	3	0.3
AT1G32900.1	| UDP-Glycosyltransferase superfamily protein | Chr1:11920582-11923506 REVERSE LENGTH=610 | 201606	67 kDa	8	17	49						2	1	57	17	0.298246
AT2G30050.1	| transducin family protein / WD-40 repeat family protein | Chr2:12825540-12826448 FORWARD LENGTH=302 | 201606	33 kDa				2	5		2		2	1	7	2	0.285714
AT2G38760.1	| annexin 3 | Chr2:16201086-16202490 FORWARD LENGTH=321 | 201606	36 kDa			2		1	2	4		3	1	7	2	0.285714
AT3G46740.1	| translocon at the outer envelope membrane of chloroplasts 75-III | Chr3:17216104-17219296 REVERSE LENGTH=818 | 201606	89 kDa	3			2	2		2		3	1	7	2	0.285714
AT3G52560.1	| ubiquitin E2 variant 1D-4 | Chr3:19494678-19495954 REVERSE LENGTH=146 | 201606	17 kDa			6	3	4		1		3	1	11	3	0.272727
AT3G48930.1	| Nucleic acid-binding%2C OB-fold-like protein | Chr3:18141017-18142189 REVERSE LENGTH=160 | 201606	18 kDa	4	1							1	1	4	1	0.25
AT5G04800.1	| Ribosomal S17 family protein | Chr5:1389217-1389642 FORWARD LENGTH=141 | 201606	16 kDa	5	1	2	1	1		1		4	2	9	2	0.222222
AT2G39010.1	| plasma membrane intrinsic protein 2E | Chr2:16291564-16293746 FORWARD LENGTH=289 | 201606	31 kDa	4	2	2		2		2		4	1	10	2	0.2
AT5G20630.1	| germin 3 | Chr5:6975315-6975950 REVERSE LENGTH=211 | 201606	22 kDa	4		2		2	2	2		4	1	10	2	0.2
AT5G42830.1	| HXXXD-type acyl-transferase family protein | Chr5:17176384-17177906 FORWARD LENGTH=450 | 201606	51 kDa			4	1	1				2	1	5	1	0.2
AT3G50820.1	| photosystem II subunit O-2 | Chr3:18891008-18892311 REVERSE LENGTH=331 | 201606	35 kDa	2	1	3		2		4	1	4	2	11	2	0.181818
AT3G15730.1	| phospholipase D alpha 1 | Chr3:5330835-5333474 FORWARD LENGTH=810 | 201606	92 kDa	3		1	1			2		3	1	6	1	0.166667
AT4G30920.1	| Cytosol aminopeptidase family protein | Chr4:15046589-15049304 REVERSE LENGTH=583 | 201606	61 kDa			6	2	2		5		3	1	13	2	0.153846
AT2G26560.1	| phospholipase A 2A | Chr2:11293912-11295708 REVERSE LENGTH=407 | 201606	44 kDa			1		4	1	2		3	1	7	1	0.142857
AT3G54110.1	| plant uncoupling mitochondrial protein 1 | Chr3:20038890-20040996 FORWARD LENGTH=306 | 201606	33 kDa	8		2	1	2		2	1	4	2	14	2	0.142857
AT1G73650.2	| 3-oxo-5-alpha-steroid 4-dehydrogenase (DUF1295) | Chr1:27688549-27690165 REVERSE LENGTH=291 | 201606	33 kDa	2		4	1	2		2		4	1	10	1	0.1
AT2G40840.1	| disproportionating enzyme 2 | Chr2:17045368-17050779 FORWARD LENGTH=955 | 201606	110 kDa	1	1	12						2	1	13	1	0.0769231
Below absent in mock treatment
AT2G31345.1	| transmembrane protein (CTNIP4) | Chr2:13365496-13365708 REVERSE LENGTH=70 | 201606	8 kDa		4		2		2		2	0	4	0	10	#DIV/0!
AT3G29090.1	| pectin methylesterase 31 | Chr3:11073804-11075335 FORWARD LENGTH=317 | 201606	36 kDa				3		1		1	0	3	0	5	#DIV/0!
AT2G17790.1	| vacuolar protein sorting-associated 35A-like protein | Chr2:7733685-7739344 FORWARD LENGTH=787 | 201606	89 kDa						4		2	0	2	0	6	#DIV/0!
AT3G57280.1	| Transmembrane proteins 14C | Chr3:21193960-21195547 FORWARD LENGTH=226 | 201606	24 kDa						1		3	0	2	0	4	#DIV/0!
AT4G17870.1	| Polyketide cyclase/dehydrase and lipid transport superfamily protein | Chr4:9928792-9929367 FORWARD LENGTH=191 | 201606	22 kDa				2		5			0	2	0	7	#DIV/0!
AT5G12200.1	| pyrimidine 2 | Chr5:3941700-3944727 REVERSE LENGTH=531 | 201606	58 kDa						3		2	0	2	0	5	#DIV/0!
AT5G25980.1	| glucoside glucohydrolase 2 | Chr5:9072730-9075143 FORWARD LENGTH=467 | 201606	53 kDa				2		3			0	2	0	5	#DIV/0!
AT4G35630.1	| phosphoserine aminotransferase | Chr4:16904205-16905497 FORWARD LENGTH=430 | 201606	47 kDa				3					0	1	0	3	#DIV/0!
AT2G41790.1	| Insulinase (Peptidase family M16) family protein | Chr2:17429453-17436110 REVERSE LENGTH=970 | 201606	111 kDa								2	0	1	0	2	#DIV/0!
AT1G75750.1	| GAST1 protein homolog 1 | Chr1:28441813-28442284 REVERSE LENGTH=98 | 201606	11 kDa		4							0	1	0	4	#DIV/0!
AT1G73010.1	| inorganic pyrophosphatase 1 | Chr1:27464780-27466180 REVERSE LENGTH=295 | 201606	34 kDa						3			0	1	0	3	#DIV/0!
AT4G11860.1	| FAM63A-like protein (DUF544) | Chr4:7134237-7138361 REVERSE LENGTH=682 | 201606	74 kDa						3			0	1	0	3	#DIV/0!
AT4G24770.1	| 31-kDa RNA binding protein | Chr4:12766223-12767952 REVERSE LENGTH=329 | 201606	36 kDa		3							0	1	0	3	#DIV/0!
AT5G42960.1	| outer envelope pore 24B-like protein | Chr5:17235184-17236478 FORWARD LENGTH=213 | 201606	23 kDa				3					0	1	0	3	#DIV/0!
ATCG00640.1	| ribosomal protein L33 | ChrC:67488-67688 FORWARD LENGTH=66 | 201606	8 kDa		5							0	1	0	5	#DIV/0!
Below absent in CTNIP4 treatment
AT1G11910.1	| aspartic proteinase A1 | Chr1:4017119-4019874 REVERSE LENGTH=506 | 201606	55 kDa					3		1		2	0	4	0	0
AT1G14830.1	| DYNAMIN-like 1C | Chr1:5107699-5111470 REVERSE LENGTH=614 | 201606	69 kDa	4								1	0	4	0	0
AT1G30360.1	| Early-responsive to dehydration stress protein (ERD4) | Chr1:10715892-10718799 FORWARD LENGTH=724 | 201606	82 kDa	5								1	0	5	0	0
AT1G64520.1	| regulatory particle non-ATPase 12A | Chr1:23956459-23958120 FORWARD LENGTH=267 | 201606	31 kDa			4						1	0	4	0	0
AT2G22170.1	| Lipase/lipooxygenase%2C PLAT/LH2 family protein | Chr2:9427010-9427742 REVERSE LENGTH=183 | 201606	20 kDa	4								1	0	4	0	0
AT2G25470.2	| receptor like protein 21 | Chr2:10838366-10841621 FORWARD LENGTH=814 | 201606	92 kDa	7								1	0	7	0	0
AT2G25910.1	| 3'-5' exonuclease domain-containing protein / K homology domain-containing protein / KH domain-containing protein | Chr2:11049379-11051997 REVERSE LENGTH=341 | 201606	38 kDa			3						1	0	3	0	0
AT2G31810.1	| ACT domain-containing small subunit of acetolactate synthase protein | Chr2:13524271-13528246 FORWARD LENGTH=491 | 201606	54 kDa	3								1	0	3	0	0
AT2G32700.1	| LEUNIG-like protein | Chr2:13867235-13871844 FORWARD LENGTH=787 | 201606	86 kDa					1		2		2	0	3	0	0
AT2G39470.2	| PsbP-like protein 2 | Chr2:16476335-16477653 FORWARD LENGTH=230 | 201606	26 kDa	3								1	0	3	0	0
AT2G41970.1	| Protein kinase superfamily protein | Chr2:17520517-17522304 REVERSE LENGTH=365 | 201606	39 kDa	6				2				2	0	8	0	0
AT2G42790.1	| citrate synthase 3 | Chr2:17803132-17805991 REVERSE LENGTH=509 | 201606	56 kDa					4				1	0	4	0	0
AT2G45790.1	| phosphomannomutase | Chr2:18855876-18857753 FORWARD LENGTH=246 | 201606	28 kDa			7						1	0	7	0	0
AT3G01180.1	| starch synthase 2 | Chr3:62456-65678 REVERSE LENGTH=792 | 201606	88 kDa			4				1		2	0	5	0	0
AT3G15950.1	| DNA topoisomerase-like protein | Chr3:5397783-5402610 REVERSE LENGTH=772 | 201606	85 kDa	3								1	0	3	0	0
AT3G26840.1	| Esterase/lipase/thioesterase family protein | Chr3:9892808-9896154 FORWARD LENGTH=701 | 201606	79 kDa			2						1	0	2	0	0
AT3G26935.1	| DHHC-type zinc finger family protein | Chr3:9933001-9935218 REVERSE LENGTH=443 | 201606	50 kDa	2				1				2	0	3	0	0
AT3G49870.2	| ADP-ribosylation factor-like A1C | Chr3:18492674-18493518 REVERSE LENGTH=165 | 201606	18 kDa	3								1	0	3	0	0
AT3G57520.1	| seed imbibition 2 | Chr3:21288982-21292694 REVERSE LENGTH=773 | 201606	85 kDa			3		1				2	0	4	0	0
AT4G01480.1	| pyrophosphorylase 5 | Chr4:626539-627758 FORWARD LENGTH=216 | 201606	25 kDa			3						1	0	3	0	0
AT4G02770.1	| photosystem I subunit D-1 | Chr4:1229247-1229873 REVERSE LENGTH=208 | 201606	23 kDa	2						3		2	0	5	0	0
AT4G14800.1	| 20S proteasome beta subunit D2 | Chr4:8500398-8502058 FORWARD LENGTH=199 | 201606	22 kDa	2								1	0	2	0	0
AT4G21580.1	| oxidoreductase%2C zinc-binding dehydrogenase family protein | Chr4:11475822-11477514 FORWARD LENGTH=325 | 201606	34 kDa							3		1	0	3	0	0
AT4G27500.1	| proton pump interactor 1 | Chr4:13743614-13745900 FORWARD LENGTH=612 | 201606	69 kDa			4		1		2		3	0	7	0	0
AT4G28750.1	| Photosystem I reaction centre subunit IV / PsaE protein | Chr4:14202951-14203888 REVERSE LENGTH=143 | 201606	15 kDa	2								1	0	2	0	0
AT4G38630.1	| regulatory particle non-ATPase 10 | Chr4:18057357-18059459 REVERSE LENGTH=386 | 201606	41 kDa			4		1				2	0	5	0	0
AT5G13450.1	| delta subunit of Mt ATP synthase | Chr5:4310558-4311941 REVERSE LENGTH=238 | 201606	26 kDa			1		2				2	0	3	0	0
AT5G23050.1	| acyl-activating enzyme 17 | Chr5:7731513-7735399 REVERSE LENGTH=721 | 201606	79 kDa							4		1	0	4	0	0
AT5G24650.1	| Mitochondrial import inner membrane translocase subunit Tim17/Tim22/Tim23 family protein | Chr5:8437123-8438859 FORWARD LENGTH=259 | 201606	28 kDa	4								1	0	4	0	0
AT5G26742.1	| DEAD box RNA helicase (RH3) | Chr5:9285540-9288871 REVERSE LENGTH=747 | 201606	81 kDa	3								1	0	3	0	0
AT5G45280.1	| Pectinacetylesterase family protein | Chr5:18346862-18349432 FORWARD LENGTH=370 | 201606	41 kDa	7								1	0	7	0	0
AT5G55940.1	| Uncharacterized protein family (UPF0172) | Chr5:22656256-22657894 REVERSE LENGTH=208 | 201606	23 kDa			2		1				2	0	3	0	0
ATCG00380.1	| chloroplast ribosomal protein S4 | ChrC:45223-45828 REVERSE LENGTH=201 | 201606	23 kDa	4								1	0	4	0	0
ATCG00720.1	| photosynthetic electron transfer B | ChrC:74841-76292 FORWARD LENGTH=215 | 201606	24 kDa	4								1	0	4	0	0
ATCG00810.1	| ribosomal protein L22 | ChrC:83467-83949 REVERSE LENGTH=160 | 201606	19 kDa	3								1	0	3	0	0
