# Supplementary material for: Perception of a conserved family of plant signalling peptides by the receptor kinase HSL3
Source: eLife. 2022 May 26;11:e74687. doi: 10.7554/eLife.74687 (PMC9191895; doi:10.7554/eLife.74687)
Supplement: Supplementary file 4. [file elife-74687-supp4.csv]

GO.ID	Term	Annotated	Significant	Expected	Uncorrected_p
Enriched among CTNIP-upregulated genes (1017 genes)
GO:0010200	response to chitin	137	78	6.44	1.00E-30
GO:0071456	cellular response to hypoxia	238	82	11.2	1.00E-30
GO:0006468	protein phosphorylation	1028	149	48.36	1.00E-30
GO:0042742	defense response to bacterium	454	96	21.36	5.10E-26
GO:0007165	signal transduction	1395	155	65.62	1.20E-17
GO:0002237	response to molecule of bacterial origin	40	17	1.88	7.40E-13
GO:0009611	response to wounding	230	39	10.82	1.60E-11
GO:0002229	defense response to oomycetes	79	23	3.72	5.40E-11
GO:0045087	innate immune response	216	48	10.16	4.50E-10
GO:0050832	defense response to fungus	239	39	11.24	6.30E-09
GO:0009751	response to salicylic acid	162	30	7.62	6.60E-09
GO:0006952	defense response	1044	184	49.11	1.80E-07
GO:0042343	indole glucosinolate metabolic process	16	8	0.75	2.10E-07
GO:0002239	response to oomycetes	101	32	4.75	2.50E-07
GO:0046777	protein autophosphorylation	178	26	8.37	2.70E-07
GO:0007166	cell surface receptor signaling pathway	58	14	2.73	3.40E-07
GO:0009626	plant-type hypersensitive response	63	14	2.96	4.30E-07
GO:0042436	indole-containing compound catabolic pro...	13	7	0.61	6.70E-07
GO:0002238	response to molecule of fungal origin	19	8	0.89	1.10E-06
GO:0009617	response to bacterium	540	114	25.4	1.20E-06
GO:0009620	response to fungus	328	57	15.43	2.20E-06
GO:0002221	pattern recognition receptor signaling p...	21	8	0.99	2.70E-06
GO:0098542	defense response to other organism	870	160	40.93	2.80E-06
GO:0052542	defense response by callose deposition	28	12	1.32	7.40E-06
GO:0002758	innate immune response-activating signal...	31	9	1.46	8.50E-06
GO:0071417	cellular response to organonitrogen comp...	41	13	1.93	1.50E-05
GO:0010193	response to ozone	33	9	1.55	1.50E-05
GO:0048544	recognition of pollen	46	10	2.16	4.40E-05
GO:0052544	defense response by callose deposition i...	16	6	0.75	5.70E-05
GO:2000280	regulation of root development	64	10	3.01	6.40E-05
GO:0009737	response to abscisic acid	561	52	26.39	0.00012
GO:1900150	regulation of defense response to fungus	35	8	1.65	0.00018
GO:1900426	positive regulation of defense response ...	27	7	1.27	0.00019
GO:0080142	regulation of salicylic acid biosyntheti...	13	5	0.61	0.00021
GO:1900424	regulation of defense response to bacter...	52	16	2.45	0.00028
GO:0009414	response to water deprivation	383	33	18.02	0.00038
GO:0071230	cellular response to amino acid stimulus	22	6	1.03	0.00042
GO:0006979	response to oxidative stress	452	47	21.26	0.00057
GO:0019722	calcium-mediated signaling	43	8	2.02	0.00078
GO:0007063	regulation of sister chromatid cohesion	10	4	0.47	0.00081
GO:0034502	protein localization to chromosome	10	4	0.47	0.00081
GO:0031348	negative regulation of defense response	69	13	3.25	0.00085
GO:0009863	salicylic acid mediated signaling pathwa...	64	9	3.01	0.00087
GO:1900425	negative regulation of defense response ...	17	5	0.8	0.00088
GO:0050776	regulation of immune response	98	19	4.61	0.00093
GO:0032879	regulation of localization	149	12	7.01	0.00096
GO:0032259	methylation	237	9	11.15	0.00113
GO:0006863	purine nucleobase transport	18	5	0.85	0.00117
GO:0051865	protein autoubiquitination	18	5	0.85	0.00117
GO:0006887	exocytosis	51	8	2.4	0.00174
GO:0009651	response to salt stress	465	38	21.87	0.00186
GO:0006816	calcium ion transport	67	10	3.15	0.00197
GO:0010941	regulation of cell death	85	12	4	0.00218
GO:0009612	response to mechanical stimulus	21	5	0.99	0.00247
GO:0050829	defense response to Gram-negative bacter...	21	5	0.99	0.00247
GO:0010337	regulation of salicylic acid metabolic p...	20	8	0.94	0.0031
GO:0010120	camalexin biosynthetic process	14	4	0.66	0.00333
GO:0007186	G protein-coupled receptor signaling pat...	23	5	1.08	0.00377
GO:0009682	induced systemic resistance	33	6	1.55	0.00396
GO:0031349	positive regulation of defense response	97	20	4.56	0.00415
GO:0009407	toxin catabolic process	44	7	2.07	0.00416
GO:0031408	oxylipin biosynthetic process	15	4	0.71	0.00438
GO:0071216	cellular response to biotic stimulus	15	4	0.71	0.00438
GO:0043928	exonucleolytic catabolism of deadenylate...	16	4	0.75	0.00562
GO:0051606	detection of stimulus	56	7	2.63	0.00639
GO:0006749	glutathione metabolic process	72	9	3.39	0.00646
GO:0019762	glucosinolate catabolic process	26	5	1.22	0.00657
GO:0045088	regulation of innate immune response	87	15	4.09	0.00685
GO:0006568	tryptophan metabolic process	31	4	1.46	0.00704
GO:0043069	negative regulation of programmed cell d...	27	5	1.27	0.00775
GO:0006874	cellular calcium ion homeostasis	50	7	2.35	0.0085
GO:0006817	phosphate ion transport	34	6	1.6	0.00872
GO:0010555	response to mannitol	18	4	0.85	0.00877
GO:0009738	abscisic acid-activated signaling pathwa...	193	18	9.08	0.00893
GO:0002213	defense response to insect	28	5	1.32	0.00908
GO:1902290	positive regulation of defense response ...	10	3	0.47	0.00971
GO:0051707	response to other organism	1135	202	53.39	0.012
GO:0071395	cellular response to jasmonic acid stimu...	106	11	4.99	0.01233
GO:1990748	cellular detoxification	40	4	1.88	0.01244
GO:0019438	aromatic compound biosynthetic process	2490	98	117.13	0.01513
GO:0007064	mitotic sister chromatid cohesion	21	4	0.99	0.01534
GO:1990110	callus formation	21	4	0.99	0.01534
GO:0050688	regulation of defense response to virus	12	3	0.56	0.01659
GO:0010310	regulation of hydrogen peroxide metaboli...	13	3	0.61	0.02083
GO:0045332	phospholipid translocation	13	3	0.61	0.02083
GO:0061025	membrane fusion	63	5	2.96	0.02085
GO:0009873	ethylene-activated signaling pathway	73	8	3.43	0.02101
GO:0008361	regulation of cell size	23	4	1.08	0.02108
GO:0010229	inflorescence development	23	4	1.08	0.02108
GO:0010150	leaf senescence	145	15	6.82	0.02125
GO:0000302	response to reactive oxygen species	163	22	7.67	0.02177
GO:0010038	response to metal ion	424	20	19.95	0.02326
GO:0009753	response to jasmonic acid	196	20	9.22	0.02452
GO:1902074	response to salt	25	4	1.18	0.02797
GO:0009593	detection of chemical stimulus	25	4	1.18	0.02797
GO:0090693	plant organ senescence	151	17	7.1	0.02868
GO:0009225	nucleotide-sugar metabolic process	50	3	2.35	0.02929
GO:0006629	lipid metabolic process	860	33	40.45	0.02989
GO:0042402	cellular biogenic amine catabolic proces...	15	3	0.71	0.0309
GO:2000067	regulation of root morphogenesis	27	4	1.27	0.03606
GO:0006955	immune response	234	54	11.01	0.03608
GO:0009967	positive regulation of signal transducti...	87	9	4.09	0.03808
GO:0002833	positive regulation of response to bioti...	89	18	4.19	0.03859
GO:0006898	receptor-mediated endocytosis	39	3	1.83	0.03969
GO:0071669	plant-type cell wall organization or bio...	277	7	13.03	0.04033
GO:0010224	response to UV-B	69	7	3.25	0.04297
GO:0072659	protein localization to plasma membrane	17	3	0.8	0.04309
GO:0052482	defense response by cell wall thickening	17	7	0.8	0.04675
GO:0009991	response to extracellular stimulus	253	14	11.9	0.04698
GO:0099587	inorganic ion import across plasma membr...	22	2	1.03	0.04704
GO:0062197	cellular response to chemical stress	123	4	5.79	0.04719
GO:0002252	immune effector process	77	11	3.62	0.04918
GO:0009862	systemic acquired resistance, salicylic ...	18	3	0.85	0.04995
Enriched among CTNIP-downregulated genes (58 genes)
GO:0009963	positive regulation of flavonoid biosynt...	11	2	0.03	4.00E-04
GO:0071483	cellular response to blue light	26	2	0.07	0.0023
GO:0043086	negative regulation of catalytic activit...	63	2	0.17	0.0129
GO:0016125	sterol metabolic process	68	2	0.19	0.015
GO:0010224	response to UV-B	69	2	0.19	0.0154
GO:0009723	response to ethylene	162	3	0.44	0.0207
GO:0010439	regulation of glucosinolate biosynthetic...	10	1	0.03	0.0271
GO:0071324	cellular response to disaccharide stimul...	10	1	0.03	0.0271
GO:0010117	photoprotection	10	1	0.03	0.0271
GO:0009926	auxin polar transport	94	2	0.26	0.0275
GO:0070370	cellular heat acclimation	11	1	0.03	0.0298
GO:0019430	removal of superoxide radicals	12	1	0.03	0.0324
GO:0071491	cellular response to red light	12	1	0.03	0.0324
GO:0071484	cellular response to light intensity	12	1	0.03	0.0324
GO:0098869	cellular oxidant detoxification	26	2	0.07	0.037
GO:0031540	regulation of anthocyanin biosynthetic p...	14	1	0.04	0.0378
GO:0051555	flavonol biosynthetic process	15	1	0.04	0.0404
GO:0016119	carotene metabolic process	15	1	0.04	0.0404
GO:0010100	negative regulation of photomorphogenesi...	15	1	0.04	0.0404
GO:2000038	regulation of stomatal complex developme...	16	1	0.04	0.043
GO:0080167	response to karrikin	123	2	0.34	0.0449
GO:0009861	jasmonic acid and ethylene-dependent sys...	17	1	0.05	0.0457
GO:0009862	systemic acquired resistance, salicylic ...	18	1	0.05	0.0483
GO:0034644	cellular response to UV	18	1	0.05	0.0483
