# Supplementary material for: Perception of a conserved family of plant signalling peptides by the receptor kinase HSL3
Source: eLife. 2022 May 26;11:e74687. doi: 10.7554/eLife.74687 (PMC9191895; doi:10.7554/eLife.74687)
Supplement: Supplementary file 5. [file elife-74687-supp5.xlsx]

## Sheet: Sheet1
Cloning
Goldengate cloning of AT5G25930
JR732_AT5G25930_Fw1	TGGTTGGGTCTCCAATGACTCGTTTACCCTTACCTTTCC
JR733_AT5G25930_Rv1	TGGTTGGGTCTCCCACATCAGACCTAGCTTGAAAACTGTTGTCATCGC
JR734_AT5G25930_Fw2	CGCAGAGGCGTTTGATGAGG
JR735_AT5G25930_Rv2_Tag	ACTGACGGTCTCCCGAAACAAAACCTAAATCTTCATCTTCTACCCT
Goldengate cloning of Medtr3g110450
Medtr3g110450 FWD	ACAGCAGGTCTCCAATGtccaaactacccctttccatatcaaaattcc
Medtr3g110450 REV	ACAGCAGGTCTCCCGAAacactatataagcaactttcttcgttttcacttcc
Goldengate cloning of AT2G31345
CTNIP4_fw	AGGGAAGGTCTCCAATGATGATGaaaaaaCAATTGGTGGtcgt
CTNIP4_Rv	AGGGAAGGTCTCCAAGCTCAGTTATGGCATCTGCCTGAAC
Goldengate cloning of AT2G31345-GFP
CTNIP4_fw	AGGGAAGGTCTCCAATGATGaaaaaaCAATTGGTGGtcgtagtt
CTNIP4_tag_Rv	TTGGACGGTCTCGCGAATTATGGCATCTGCCTGAACCG
Genotyping
JR881	CTGTTTCCGACAATCCGGTAAGC
JR882	CTTAACGGGTCGGATCCCAGATG
LBb1.3	ATTTTGCCGATTTCGGAAC
WiscDsLB	TCCTCGAGTTTCTCCATAATAATGT
CRISPR_constructs
JR655_At2g31345CRISPR	tgtggtctcaATTGTCAGGCGTTGCAAAGAGGACGTTTAAGAGCTATGCTGGAA
JR657_AT1G06135CRISPR	tgtggtctcaATTGTCATCGGCAGCTGTTGGGAAGTTTAAGAGCTATGCTGGAA
JR659_AT1G06137CRISPR	tgtggtctcaATTGATCTCACTGTCGGCTTGAAGGTTTAAGAGCTATGCTGGAA
JR661_At2g31335CRISPR	tgtggtctcaATTGGCAAGGACTCGAACACGAACGTTTAAGAGCTATGCTGGAA
JR654_At2g31345CRISPR	tgtggtctcaATTGTGGCATCTGCCTGAACCGCGGTTTAAGAGCTATGCTGGAA
JR656_AT1G06135CRISPR	tgtggtctcaATTGTGGCACCTAGGTGTACCACGGTTTAAGAGCTATGCTGGAA
JR658_AT1G06137CRISPR	tgtggtctcaATTGGGTTGCACAAACATCCCAGGGTTTAAGAGCTATGCTGGAA
JR660_At2g31335CRISPR	tgtggtctcaATTGCTTTGGGGATGTGAGAGCAAGTTTAAGAGCTATGCTGGAA
